# Supplementary material for: Cortical astrocytes develop in a plastic manner at both clonal and cellular levels
Source: PubMed Central journal article supplement (PMC6814723; doi:10.1038/s41467-019-12791-5), 2019-10-25

# **P7 Clones**

**P7 Dataset #1**

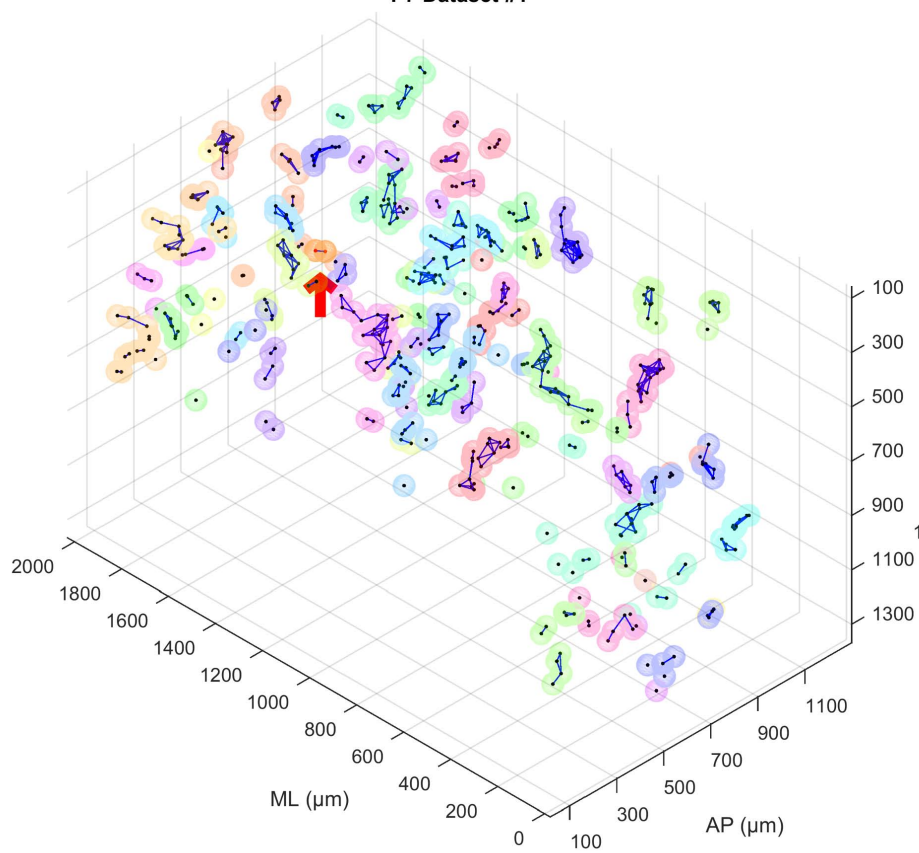

**Clone #1**

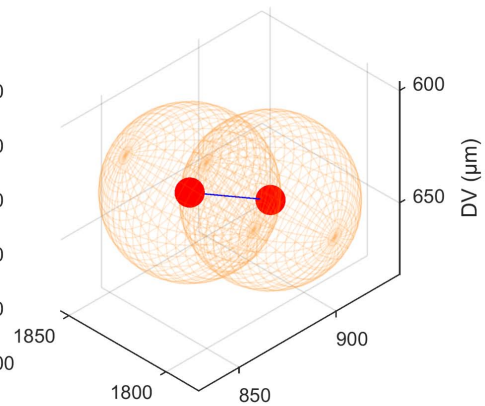

P7 Dataset #1

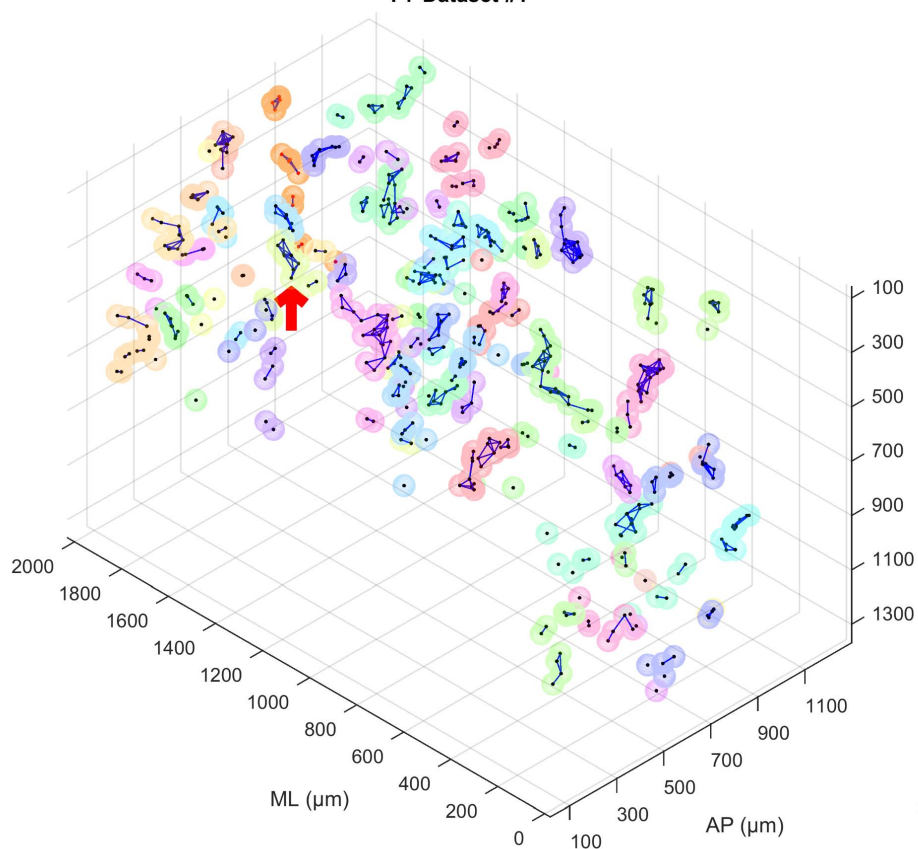

Clone #2

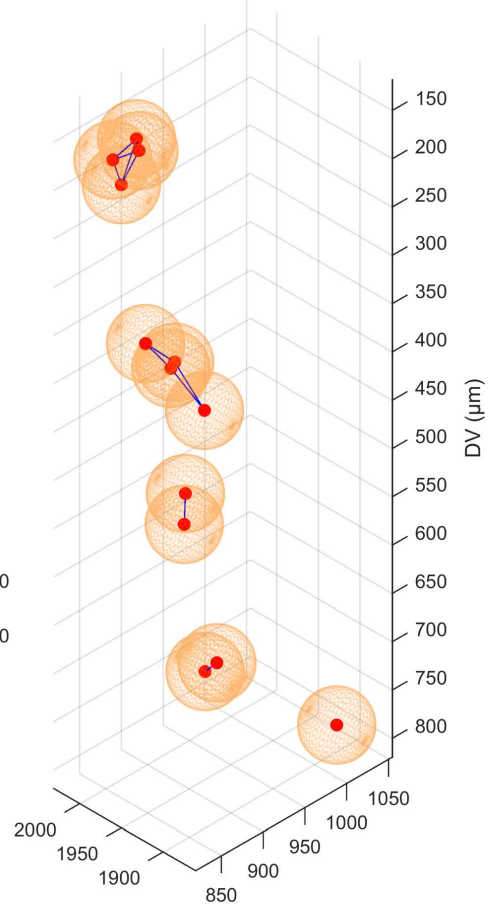

P7 Dataset #1

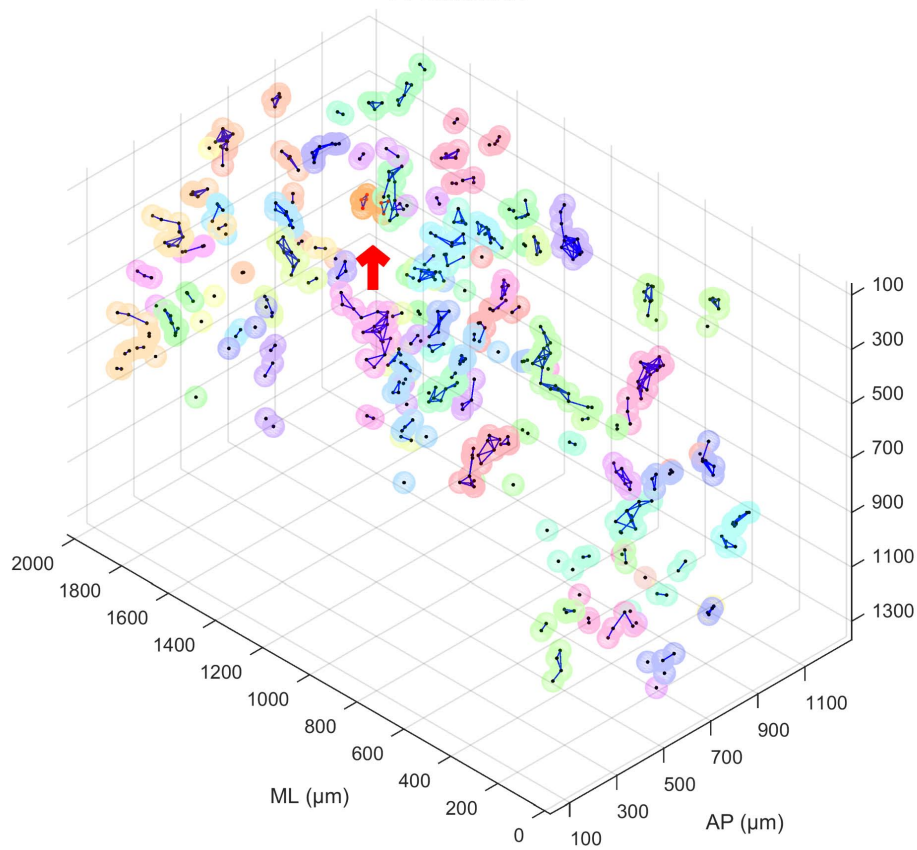

Clone #3

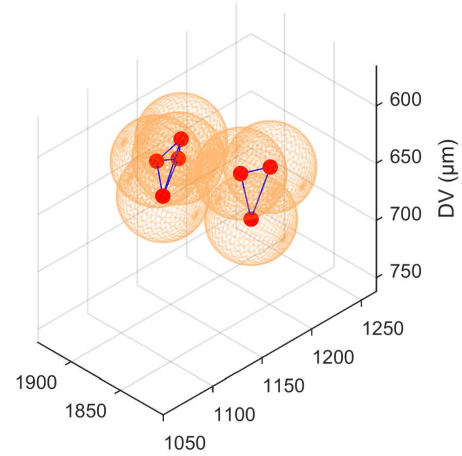

**P7 Dataset #1**

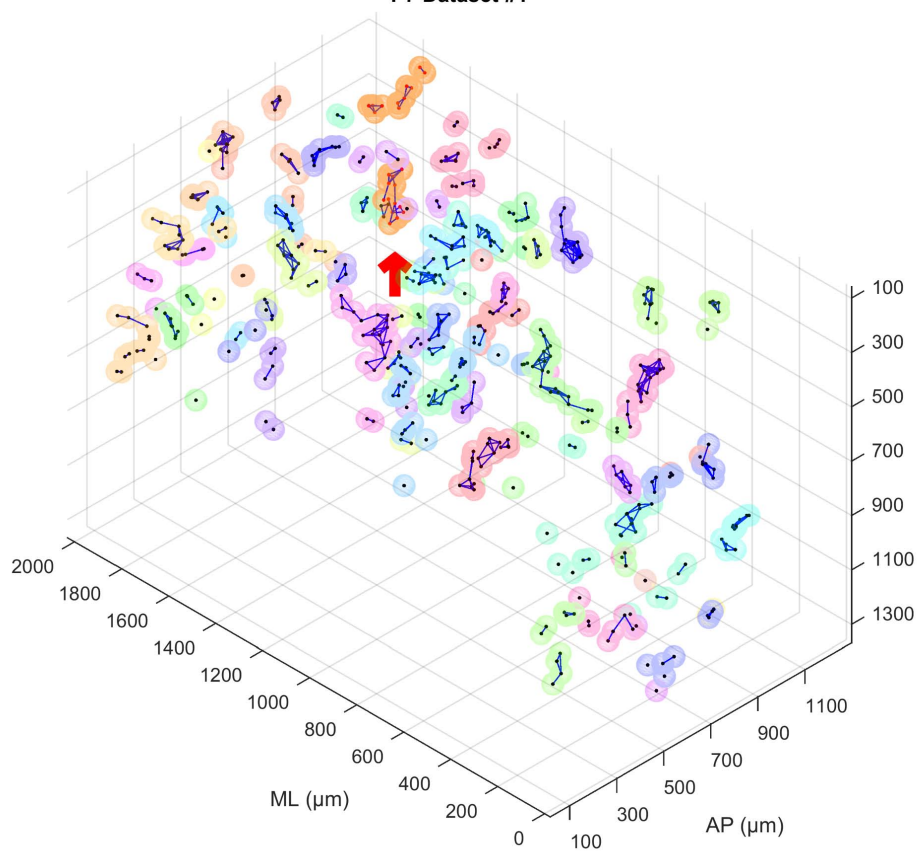

**Clone #4**

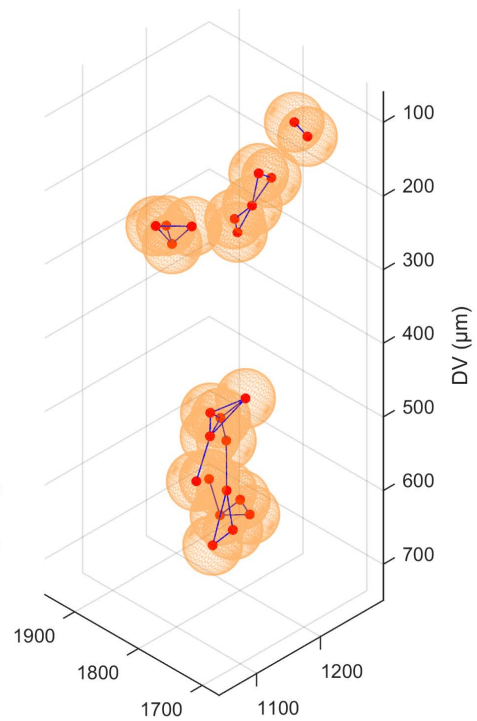

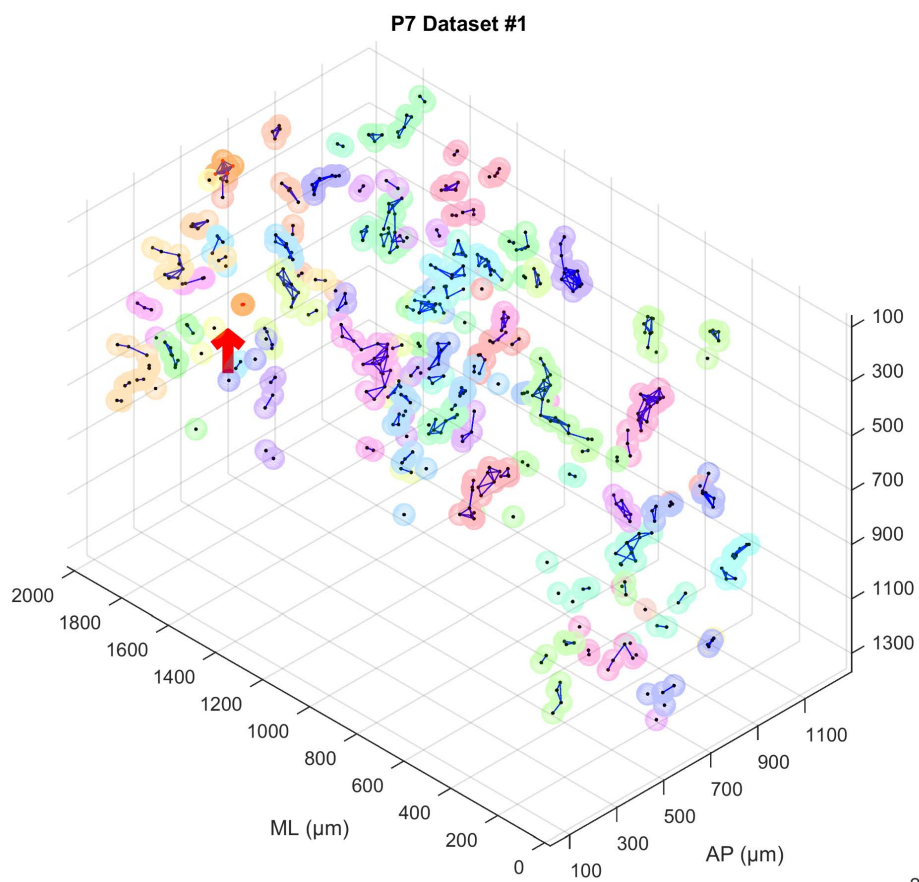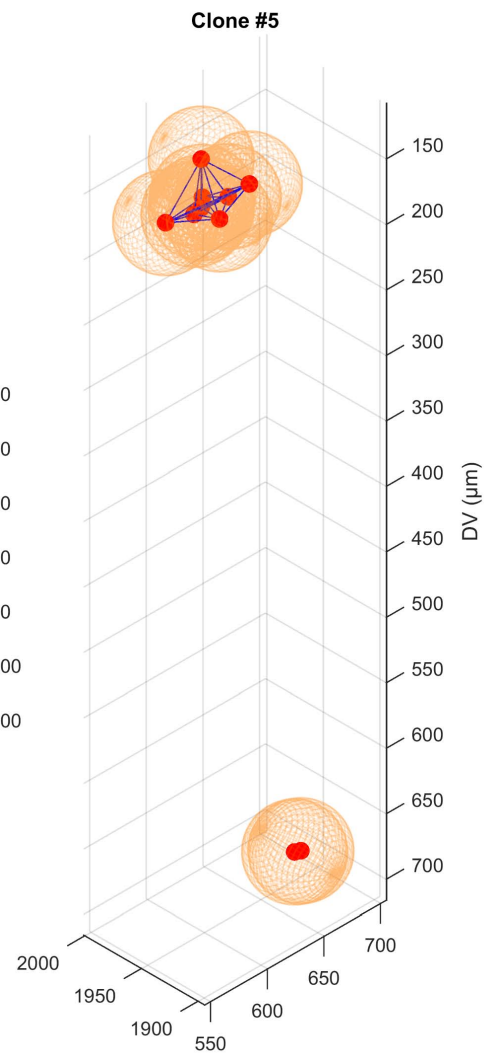

P7 Dataset #1

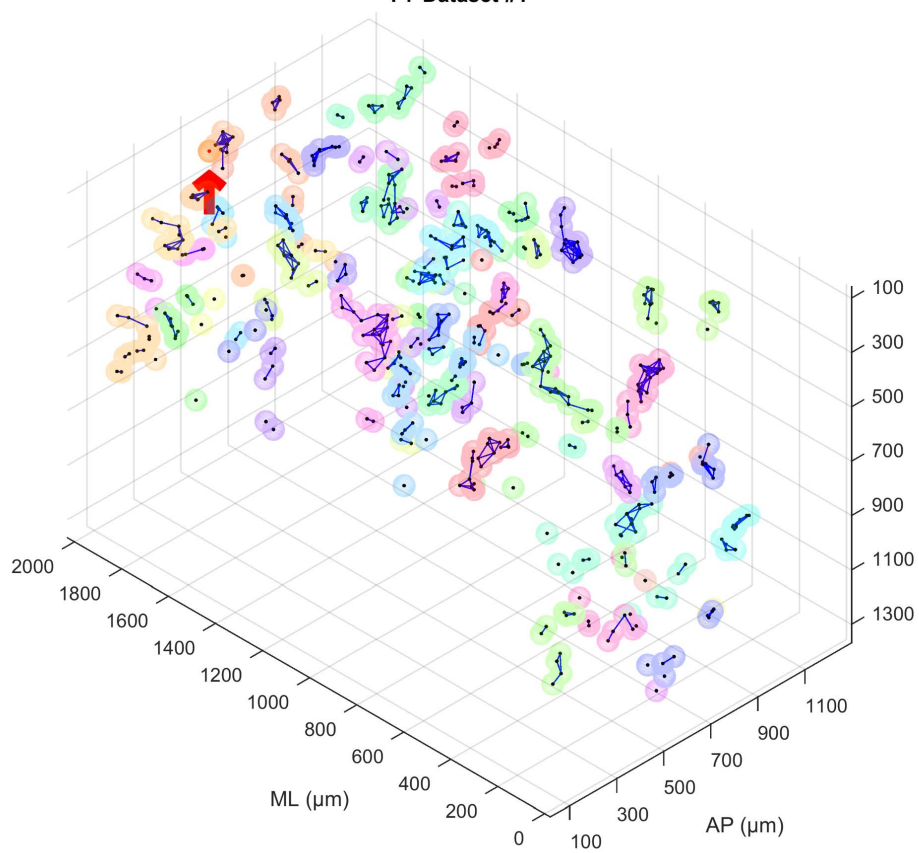

Clone #6

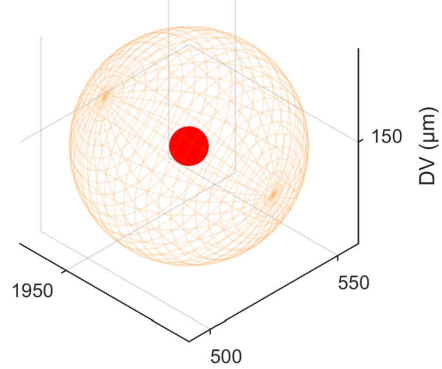

**P7 Dataset #1**

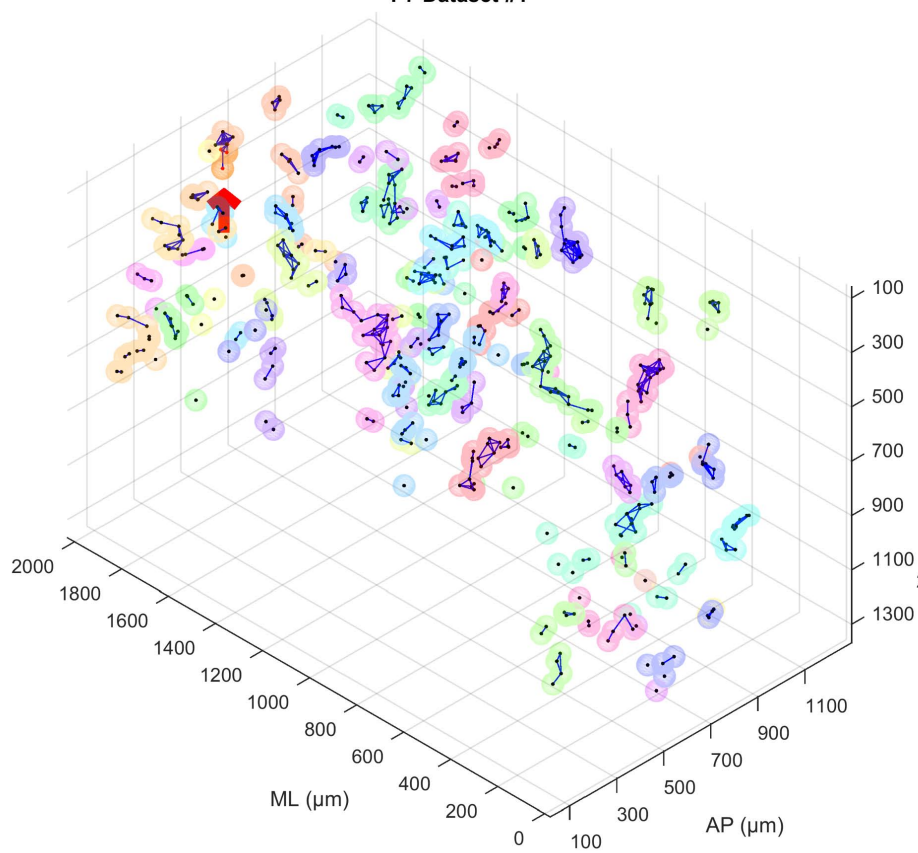

**Clone #7**

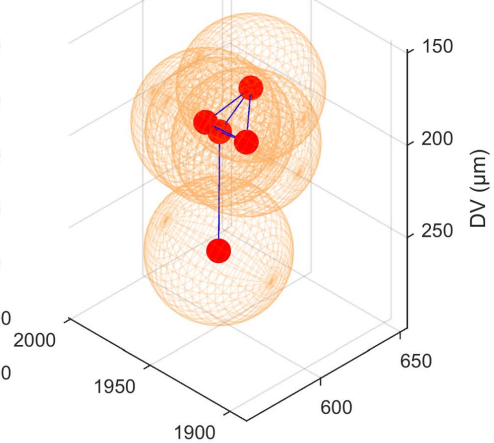



P7 Dataset #1

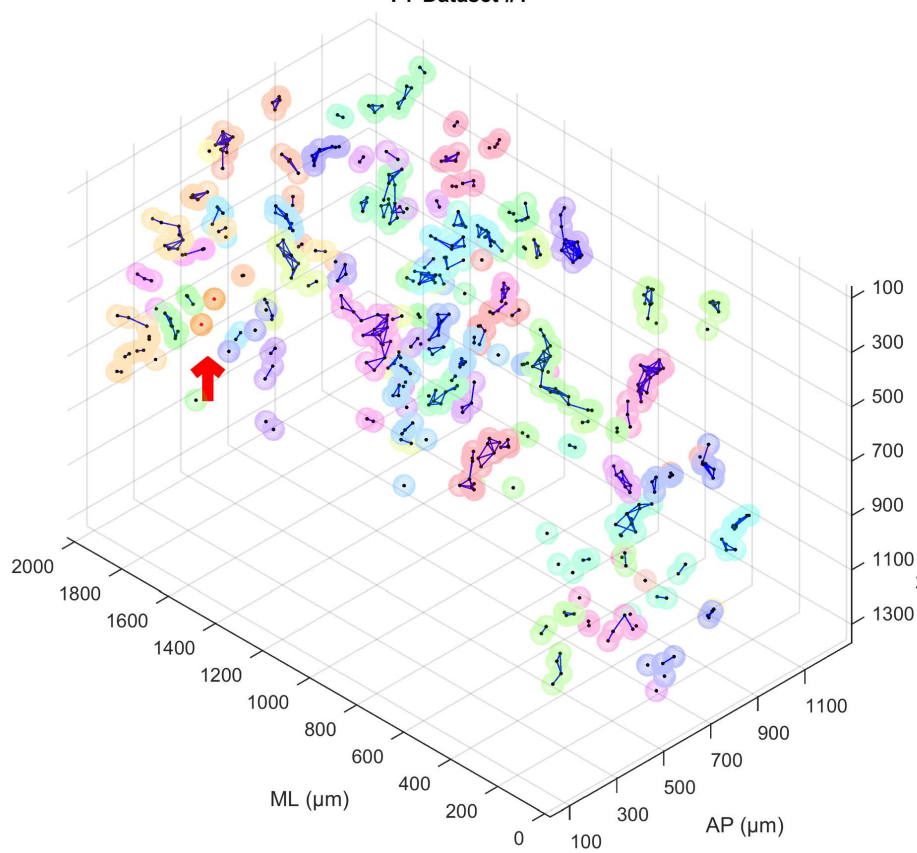

Clone #8

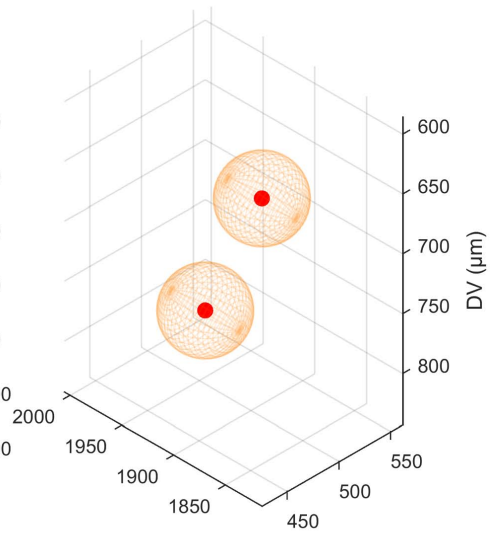

P7 Dataset #1

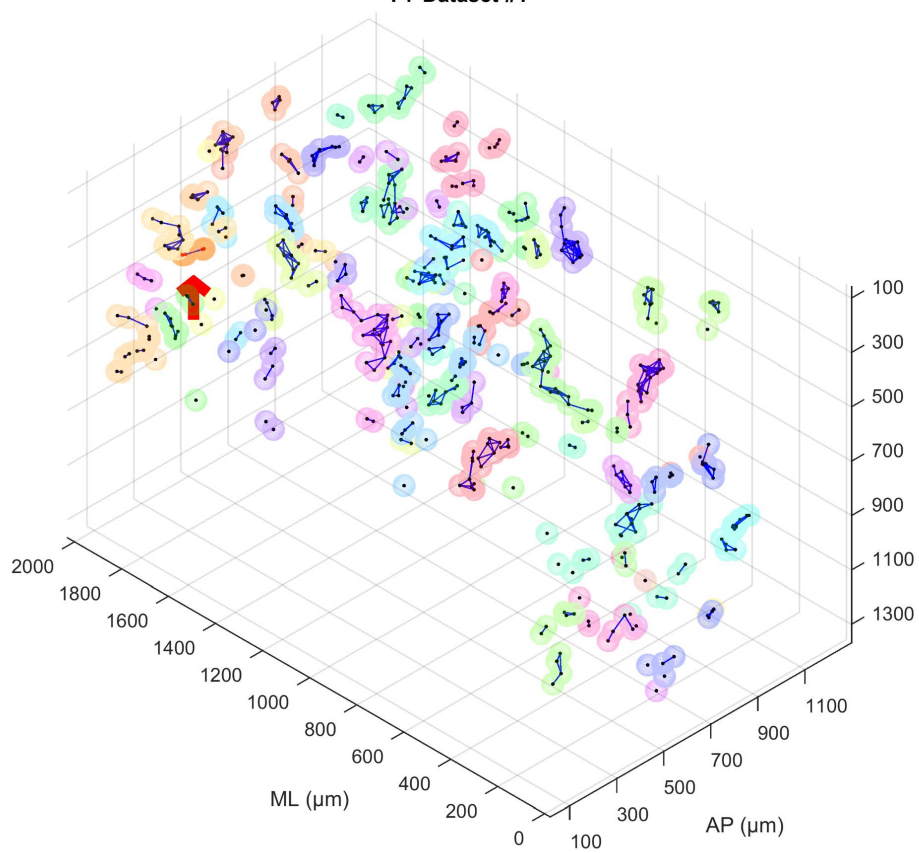

Clone #9

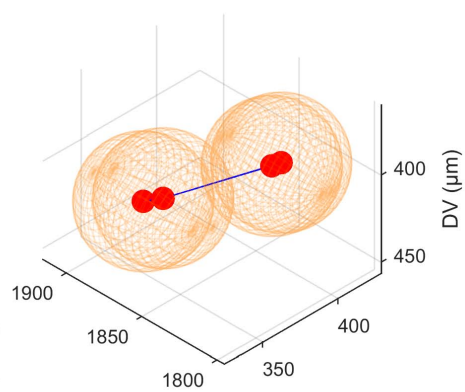

**P7 Dataset #1**

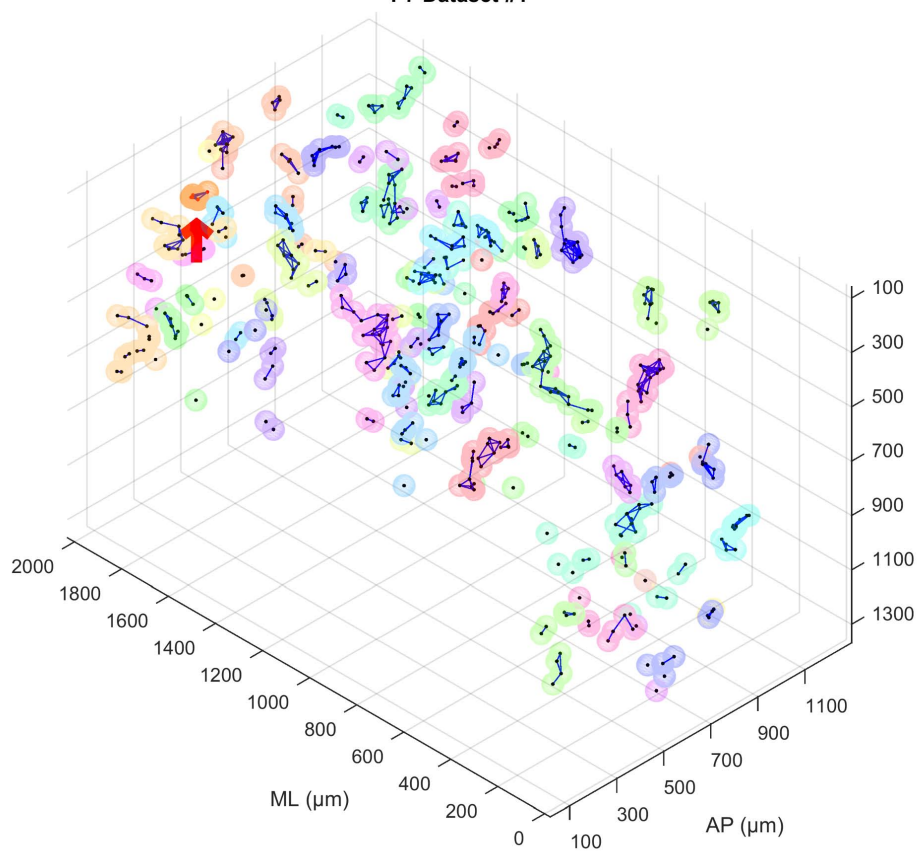

**Clone #10**

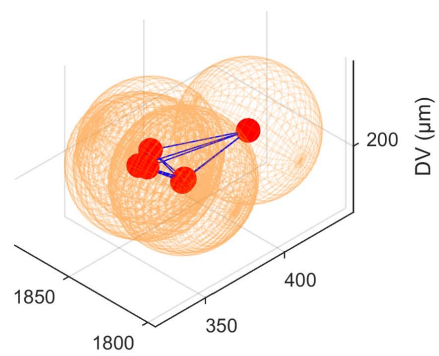

P7 Dataset #1

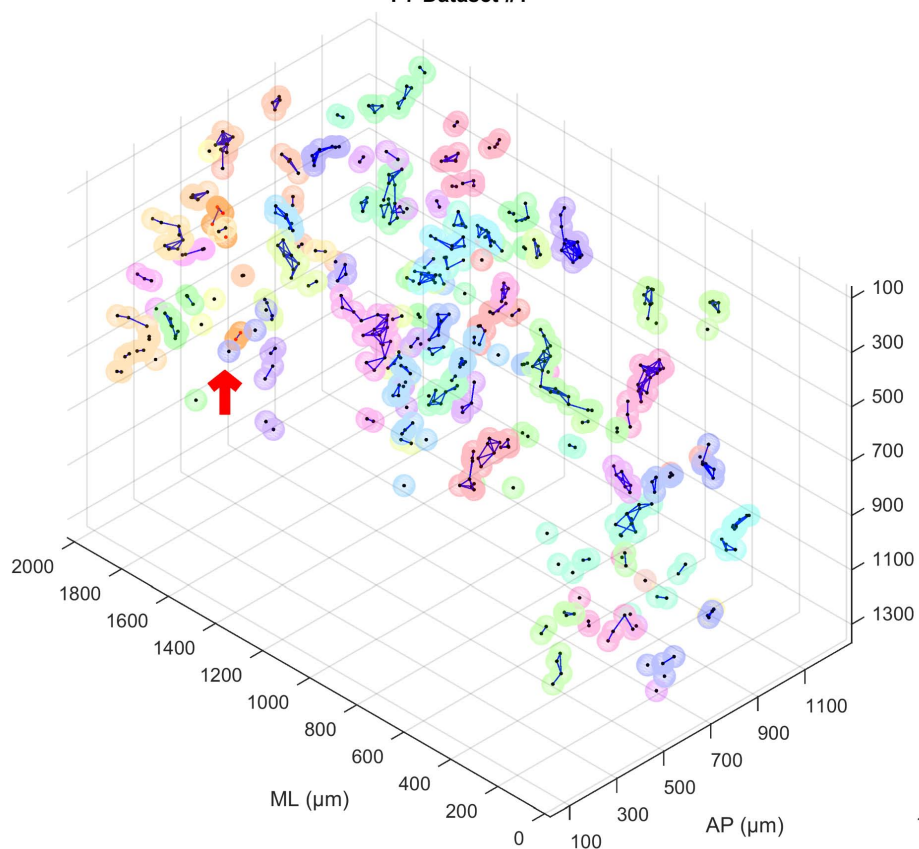

Clone #11

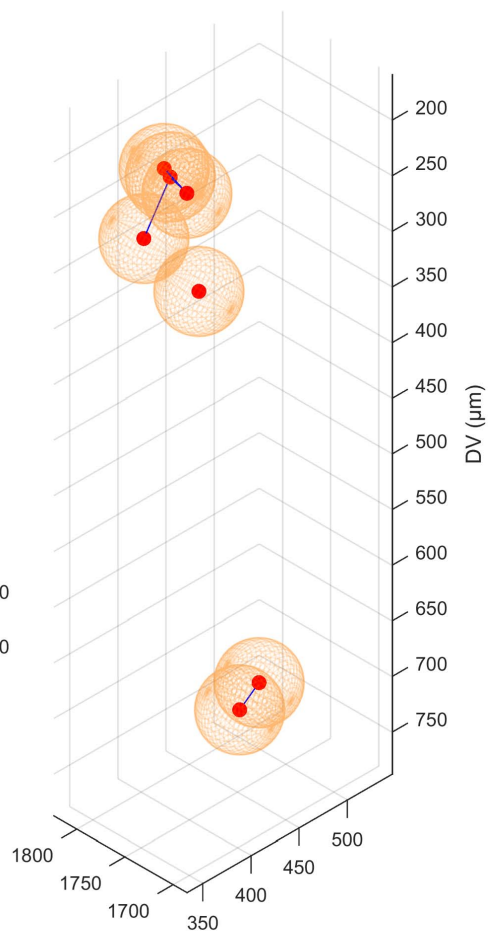

**P7 Dataset #1**

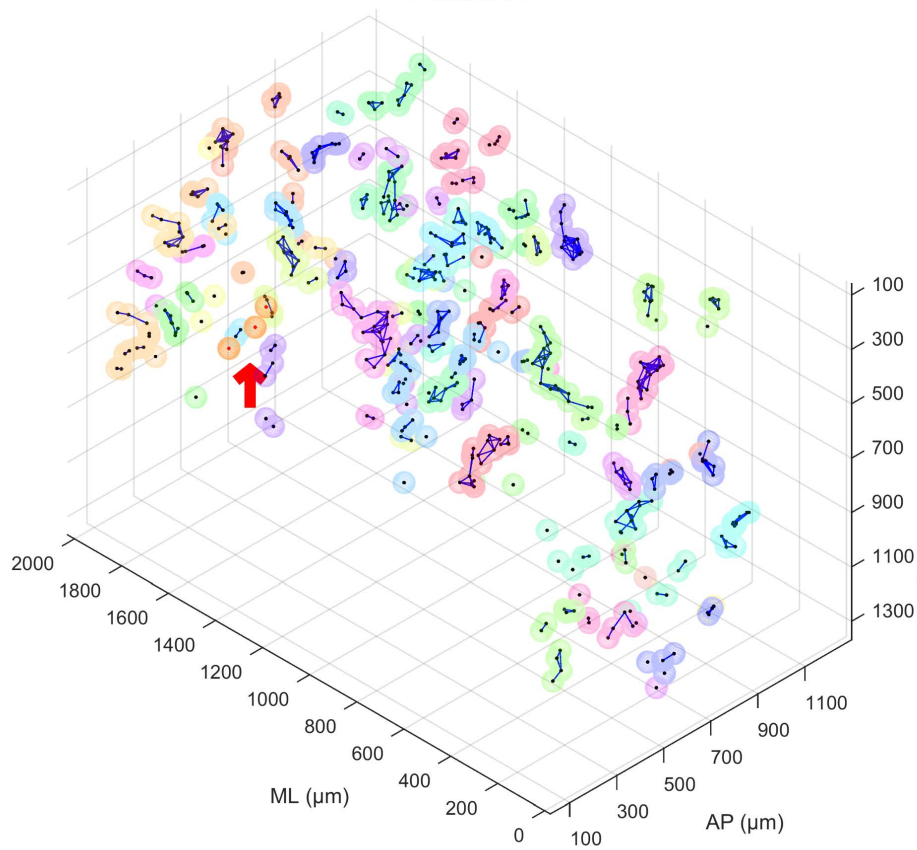

**Clone #12**

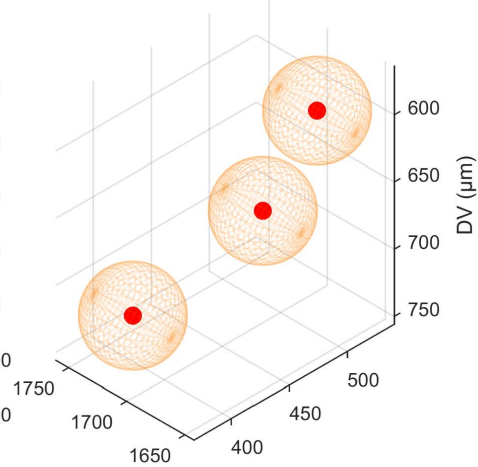

**P7 Dataset #1**

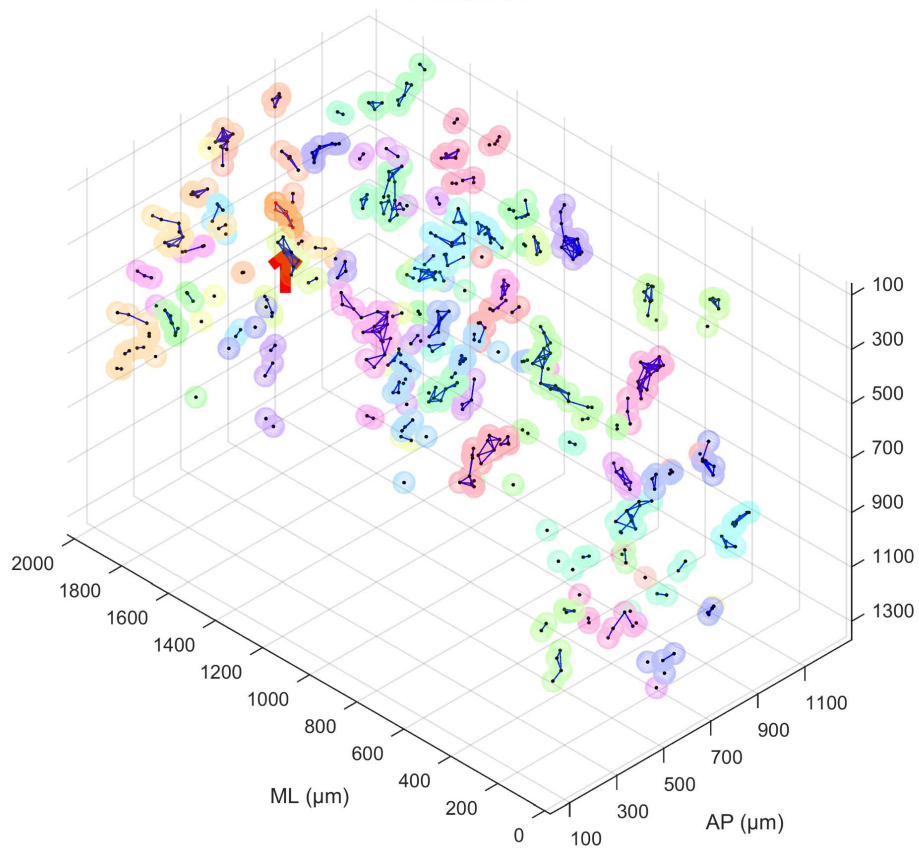

**Clone #13**

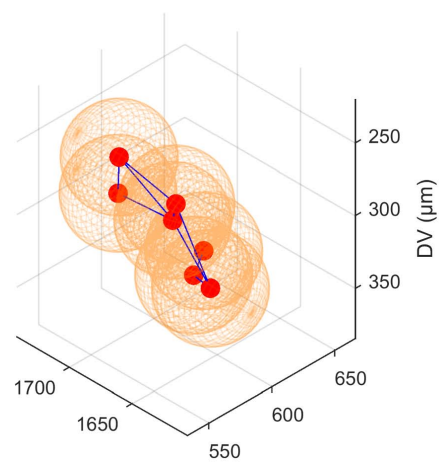

**P7 Dataset #1**

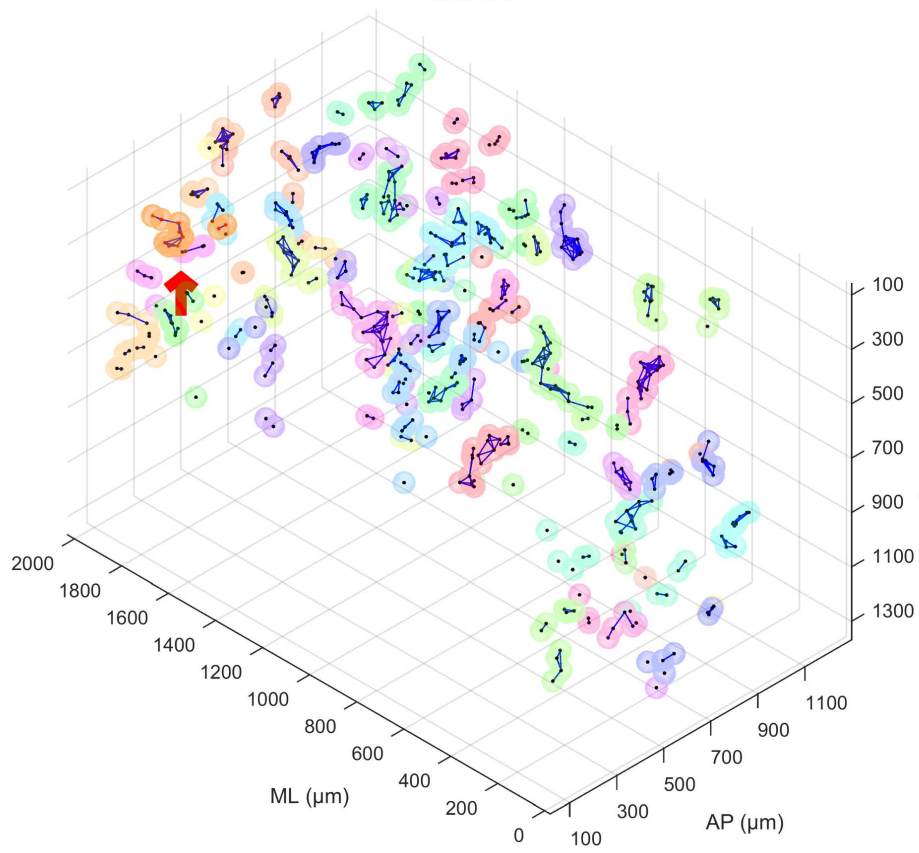

**Clone #14**

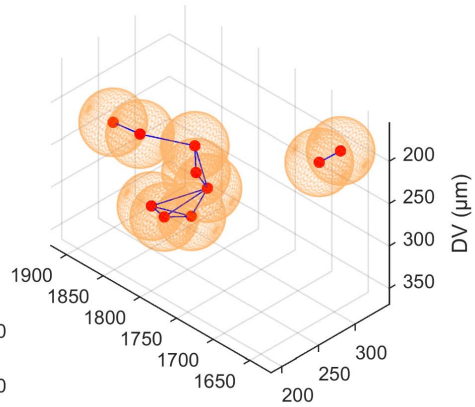

**P7 Dataset #1**

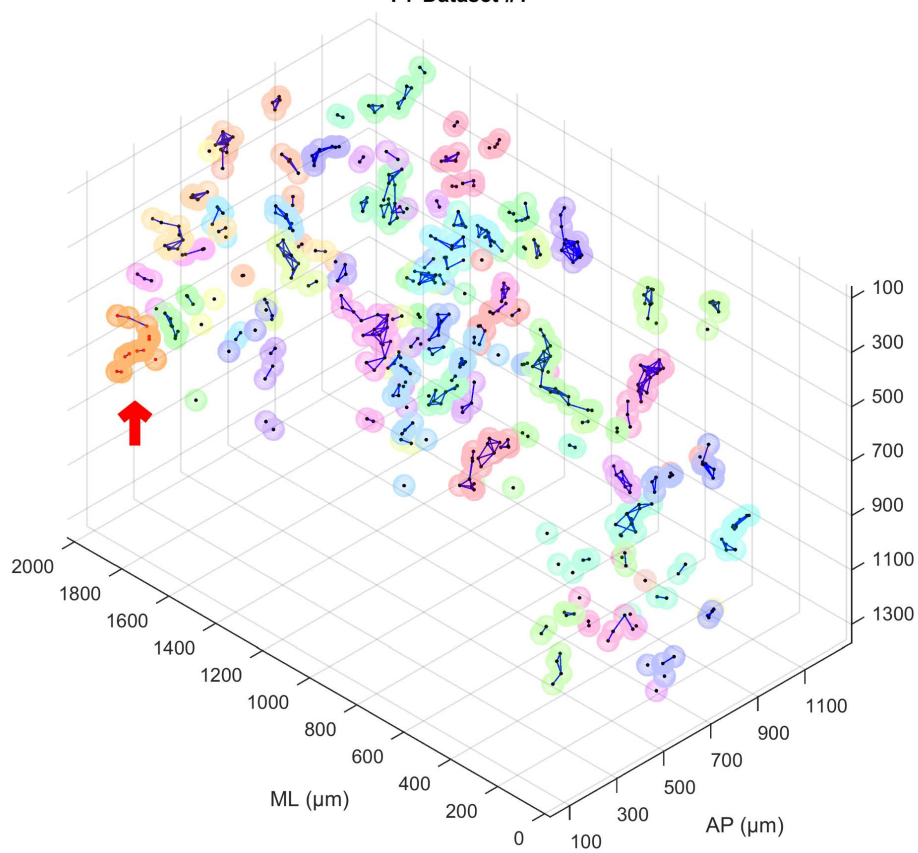

**Clone #15**

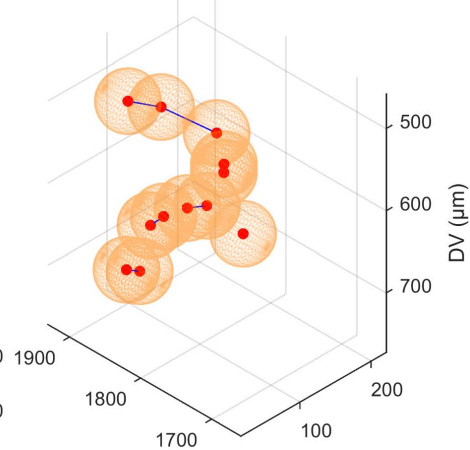



**P7 Dataset #1**

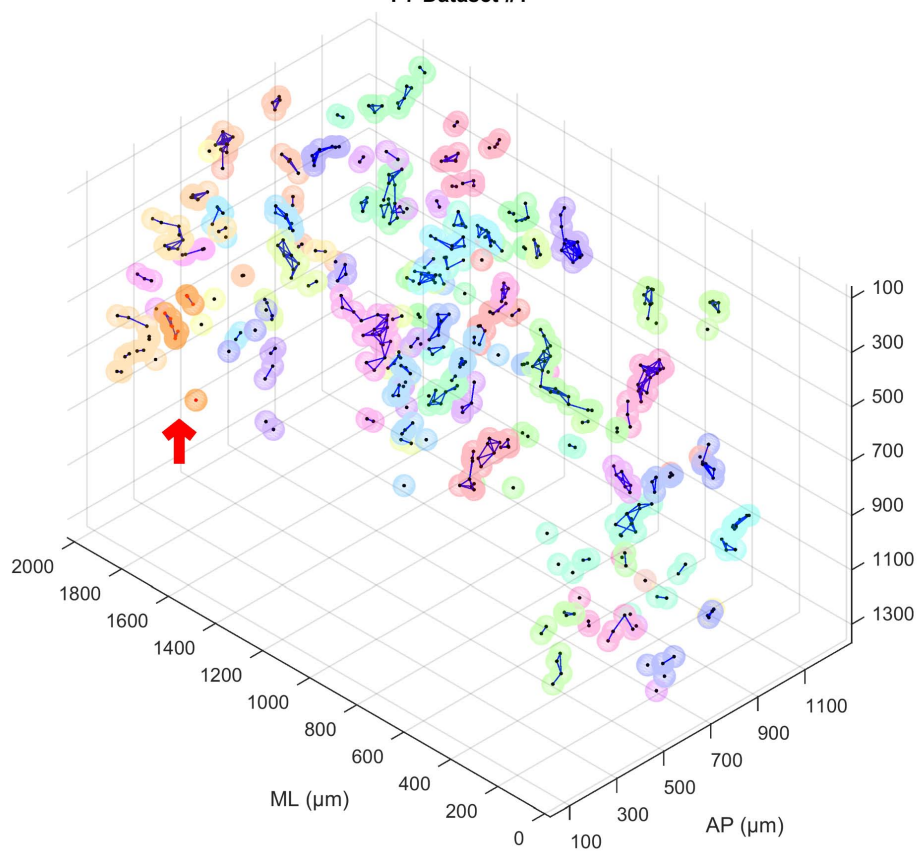

**Clone #16**

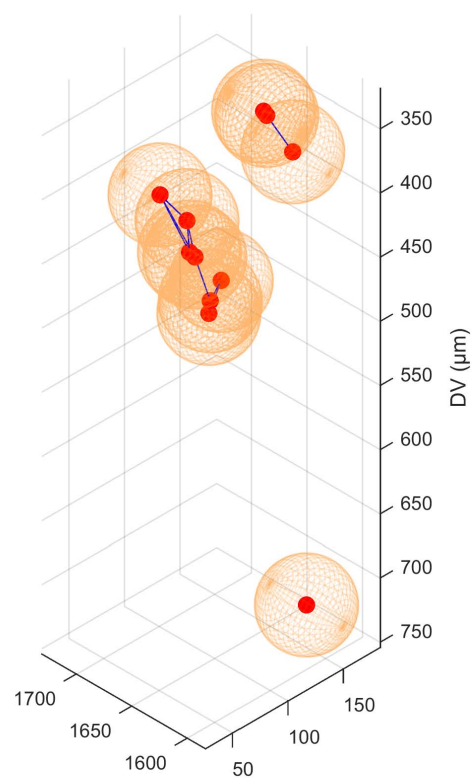

P7 Dataset #1

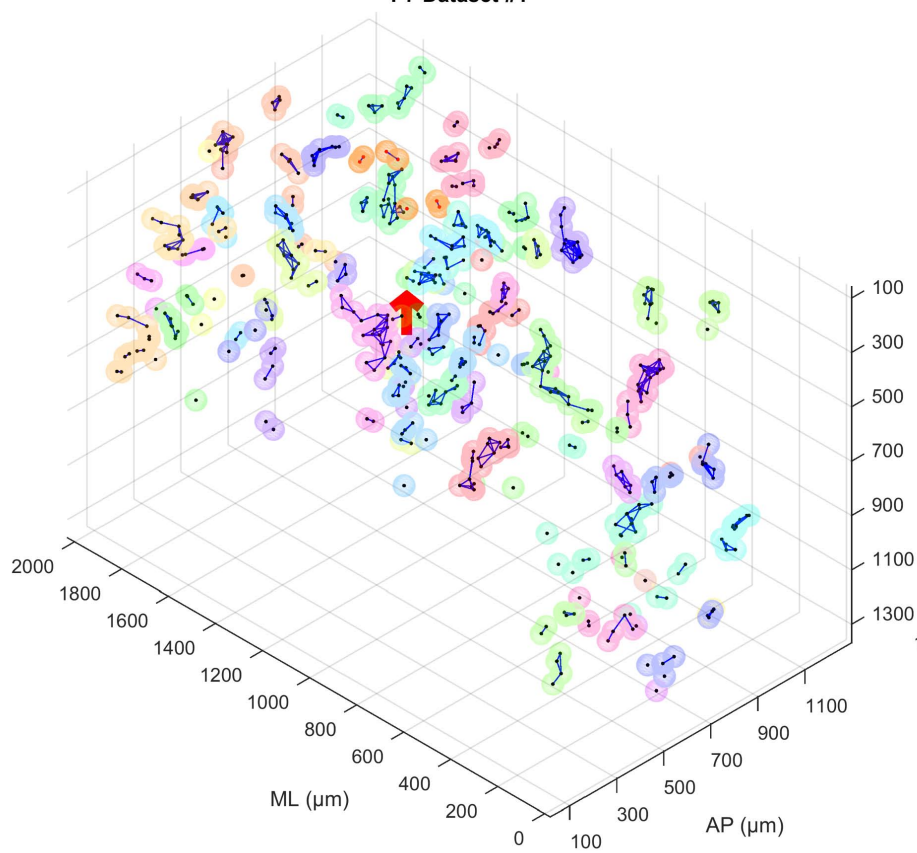

Clone #17

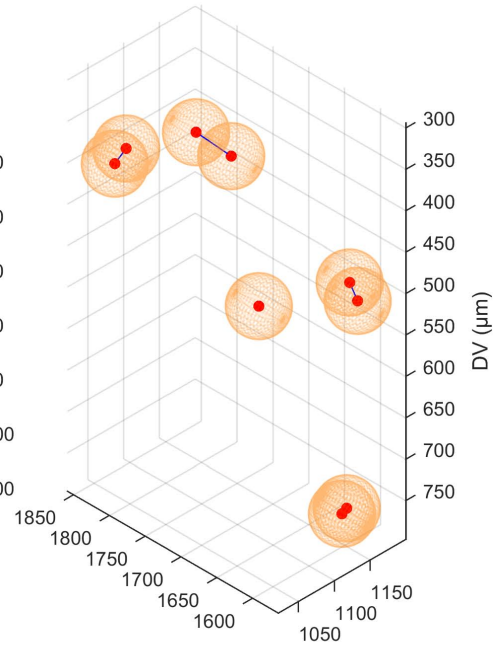

**P7 Dataset #1**

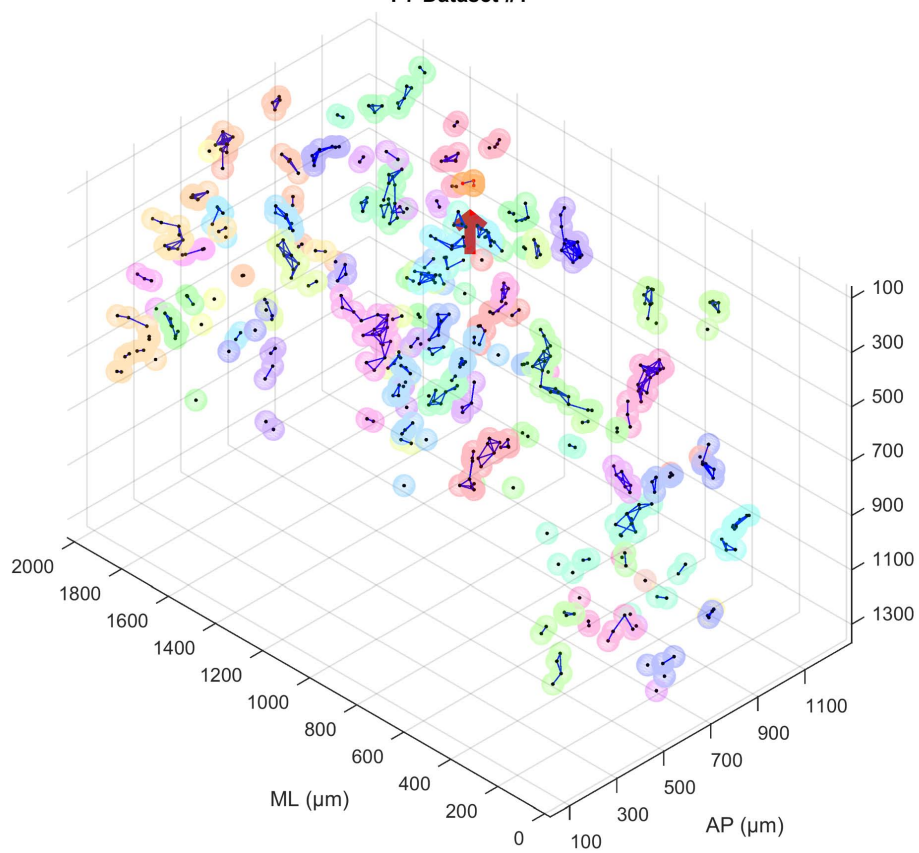

**Clone #18**

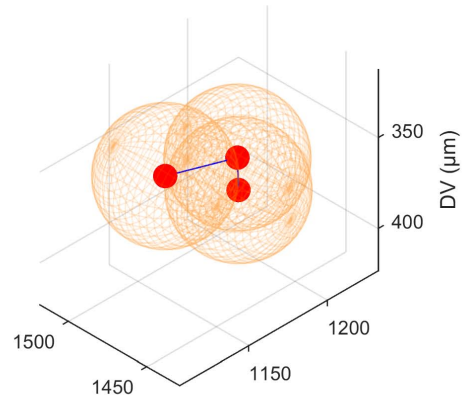

**P7 Dataset #1**

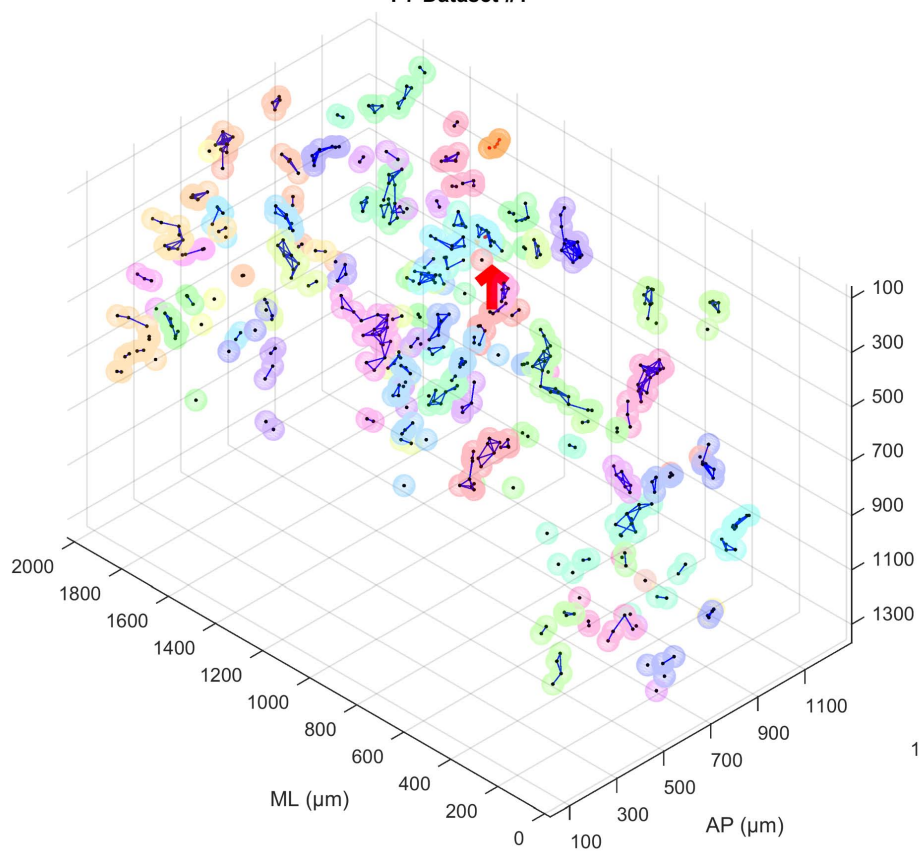

**Clone #19**

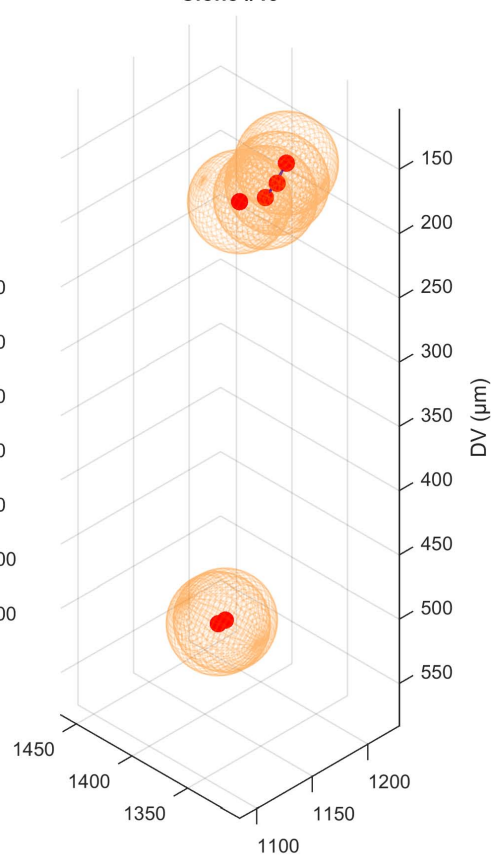

P7 Dataset #1

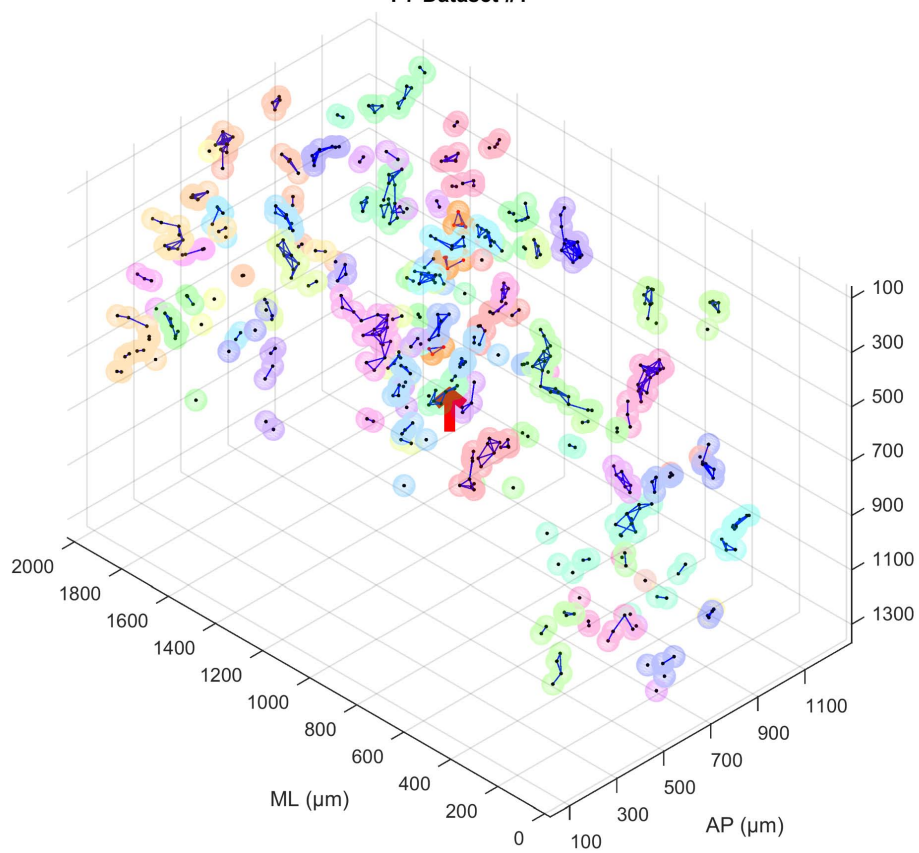

Clone #20

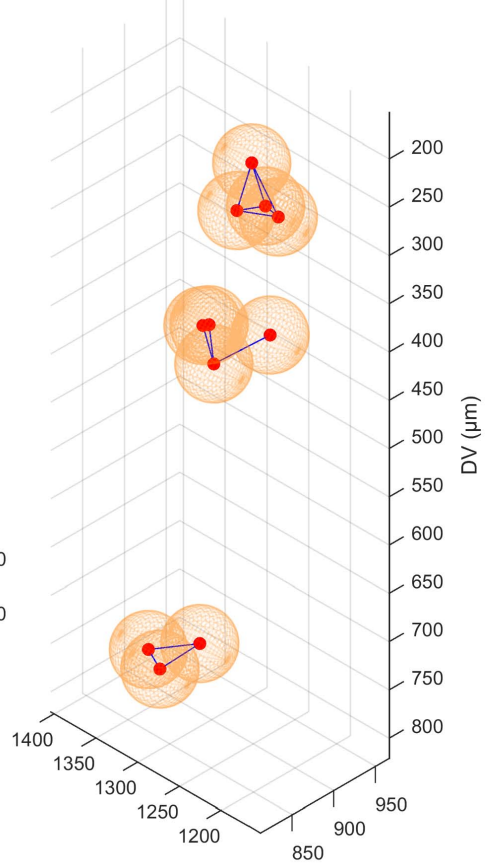

**P7 Dataset #1**

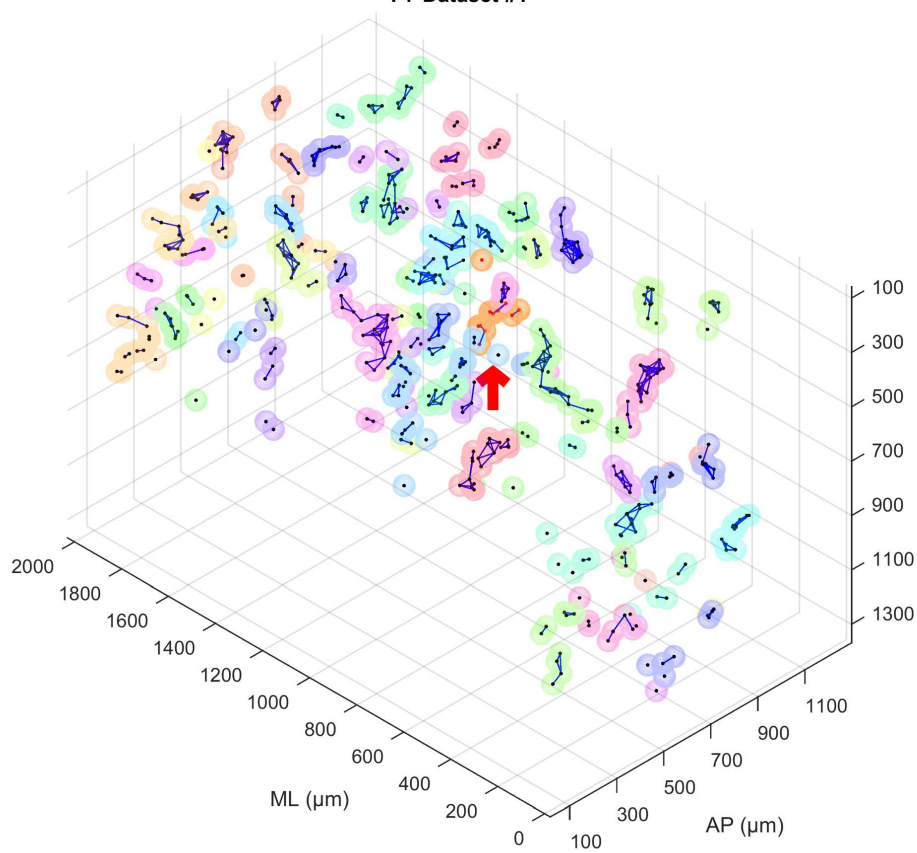

**Clone #21**

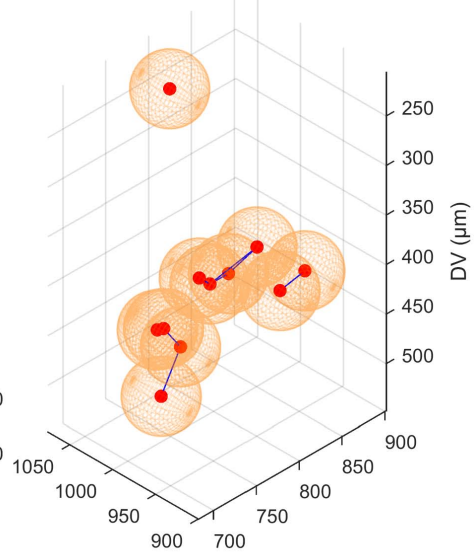

**P7 Dataset #1**

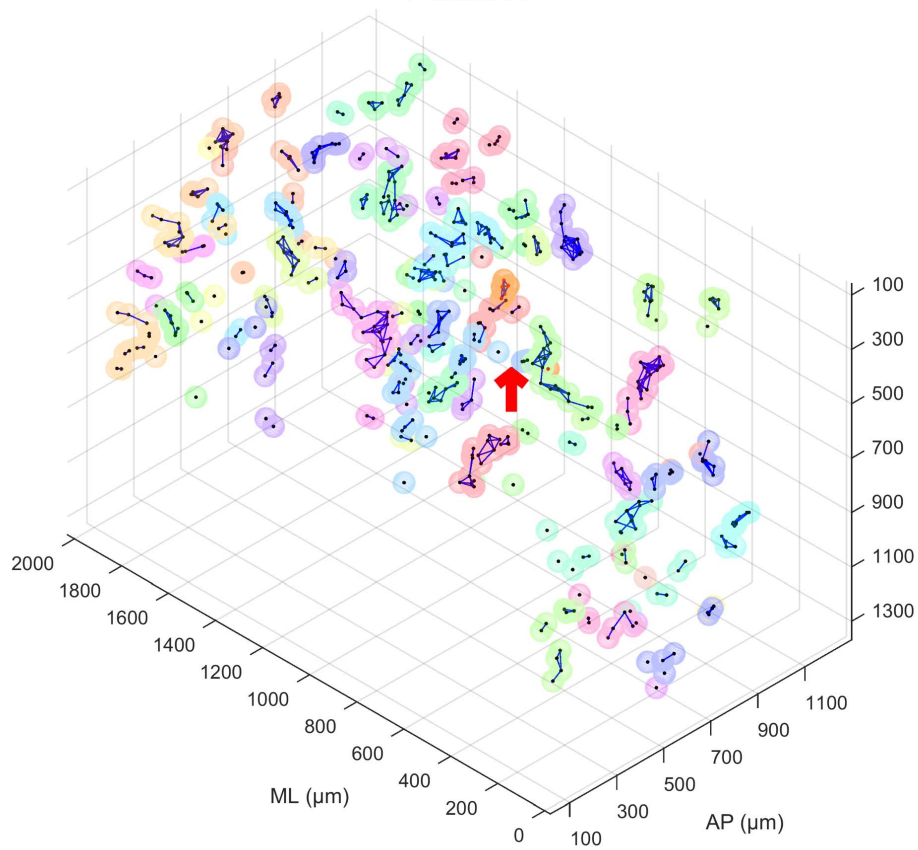

**Clone #22**

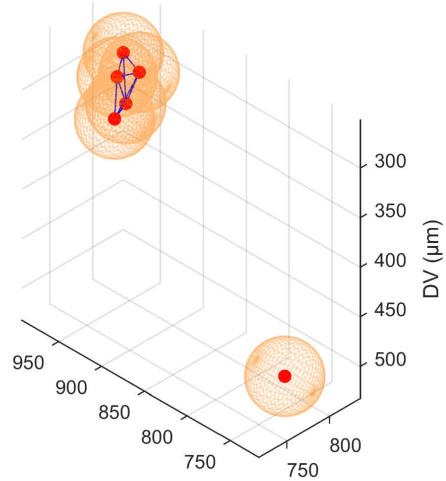

**P7 Dataset #1**

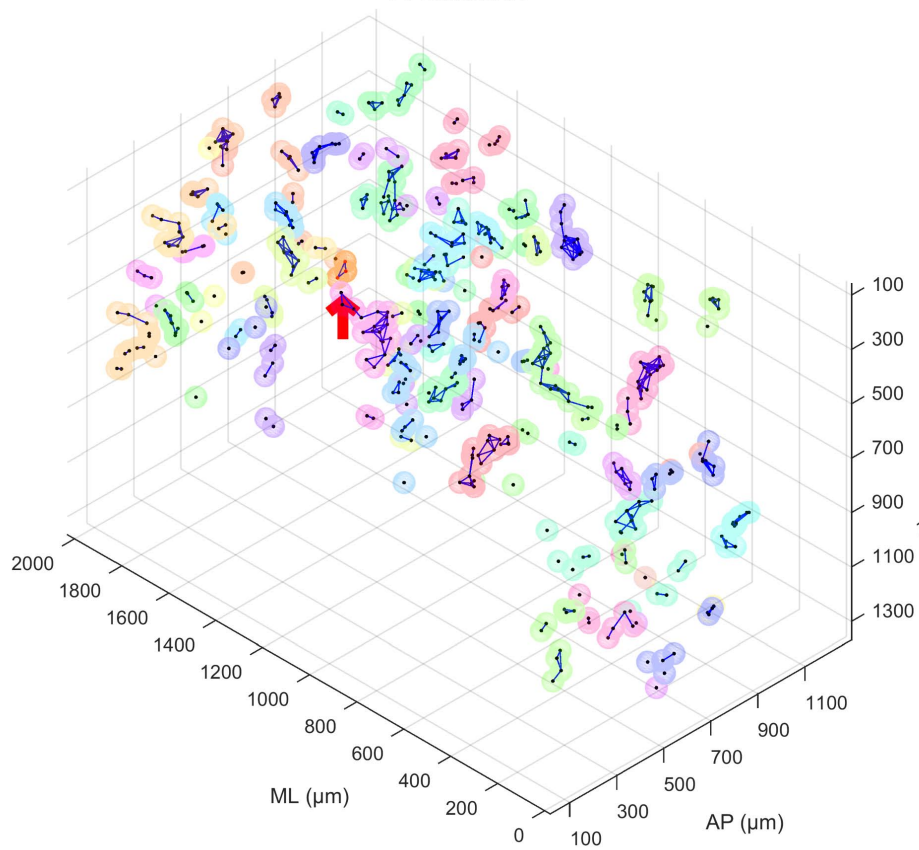

**Clone #23**

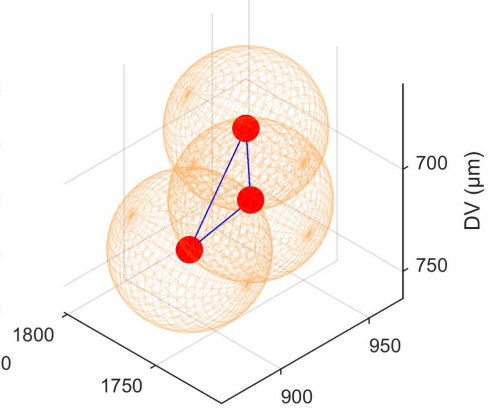



**P7 Dataset #1**

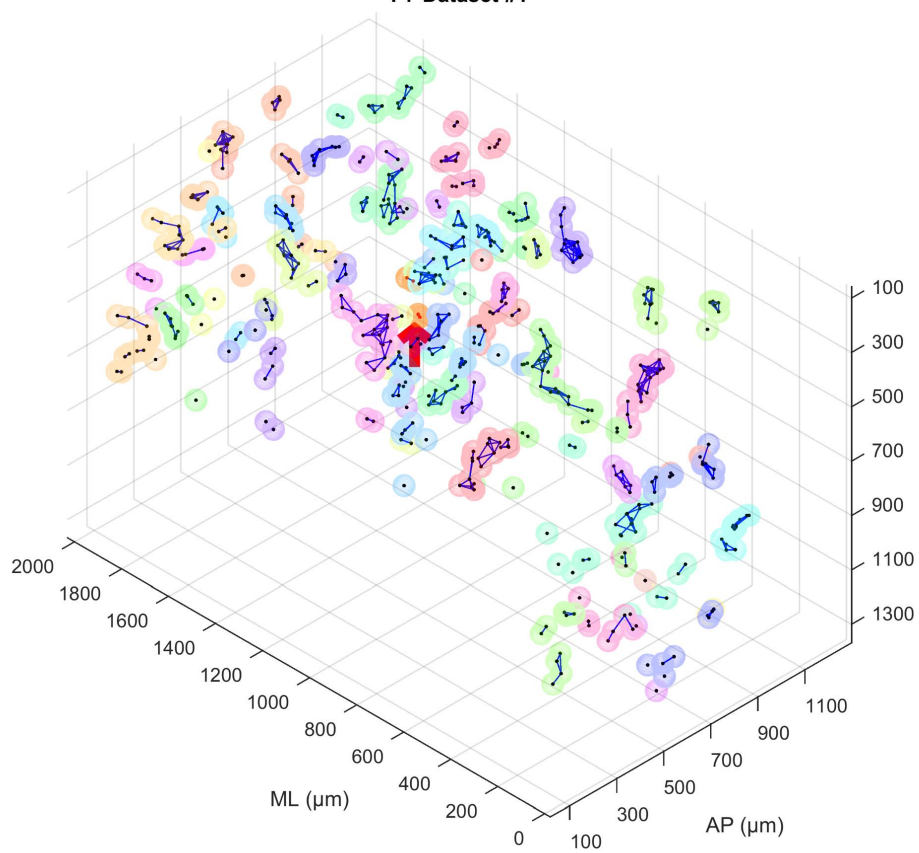

**Clone #24**

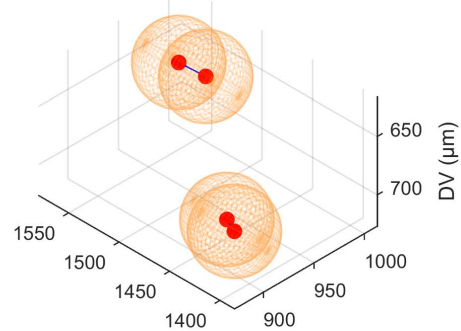

**P7 Dataset #1**

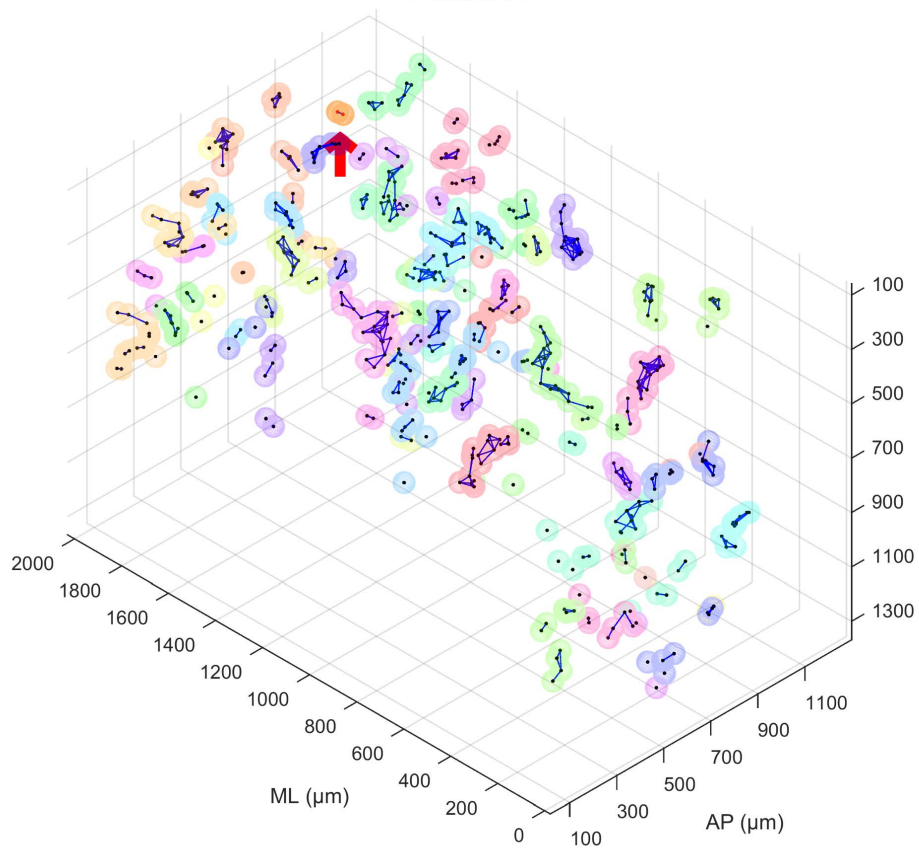

**Clone #25**

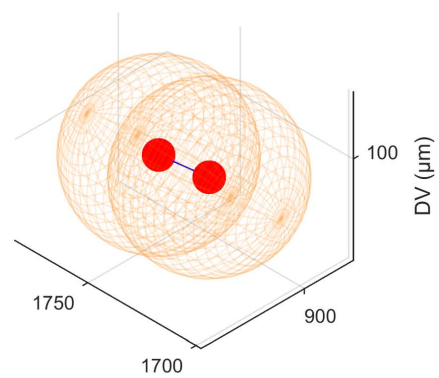

**P7 Dataset #1**

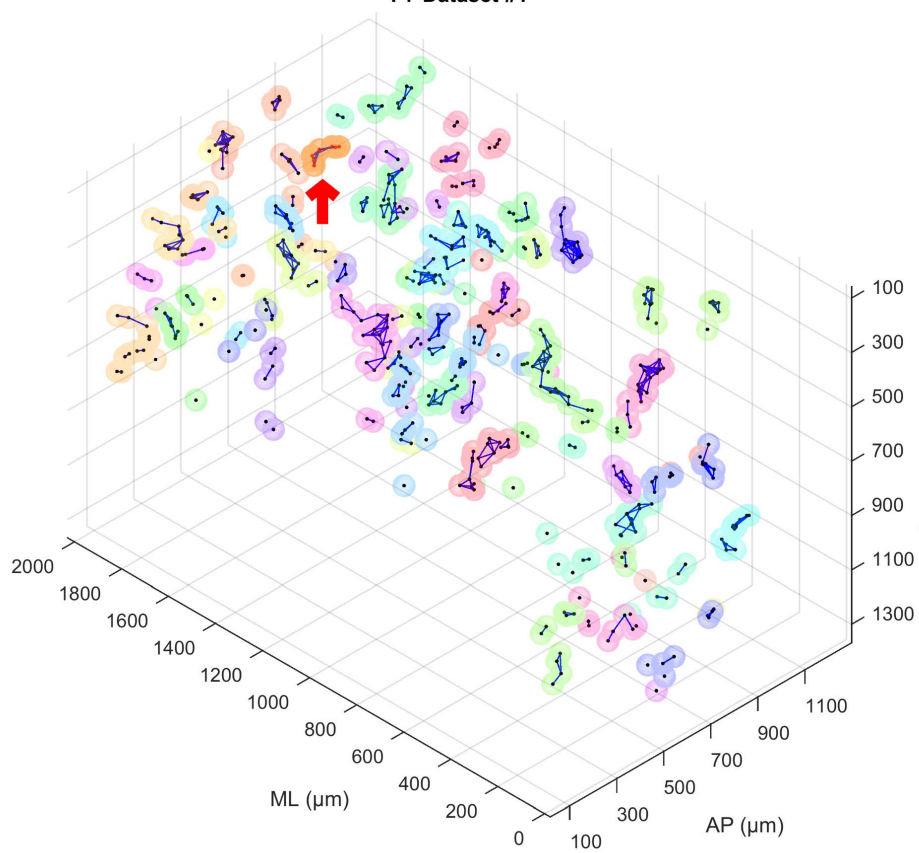

**Clone #26**

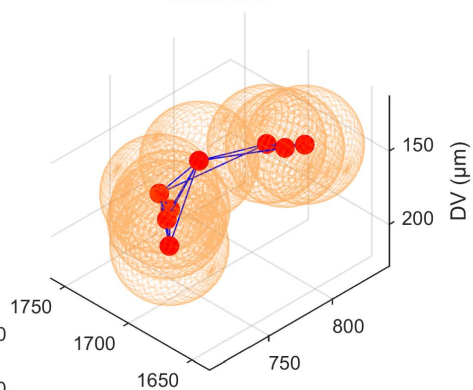

**P7 Dataset #1**

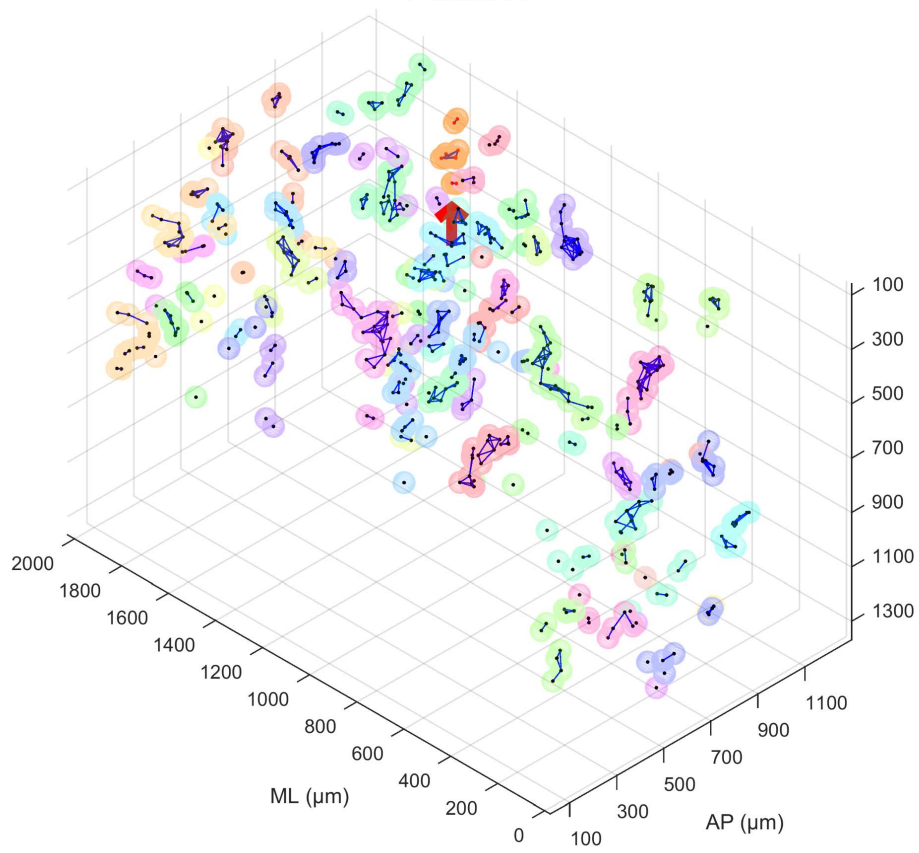

**Clone #27**

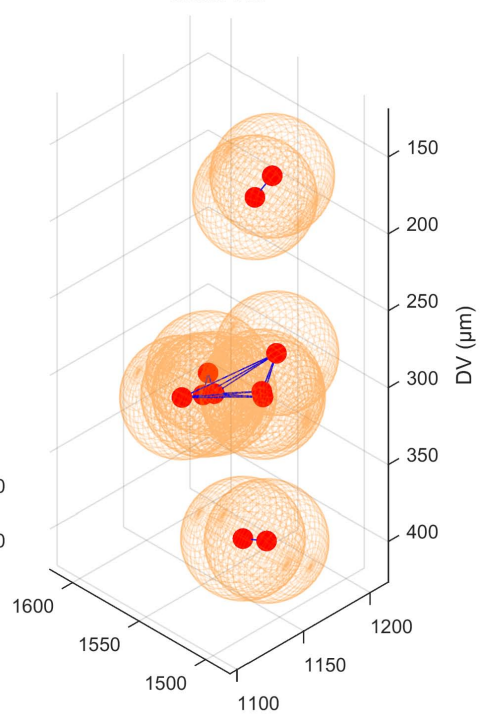

**P7 Dataset #1**

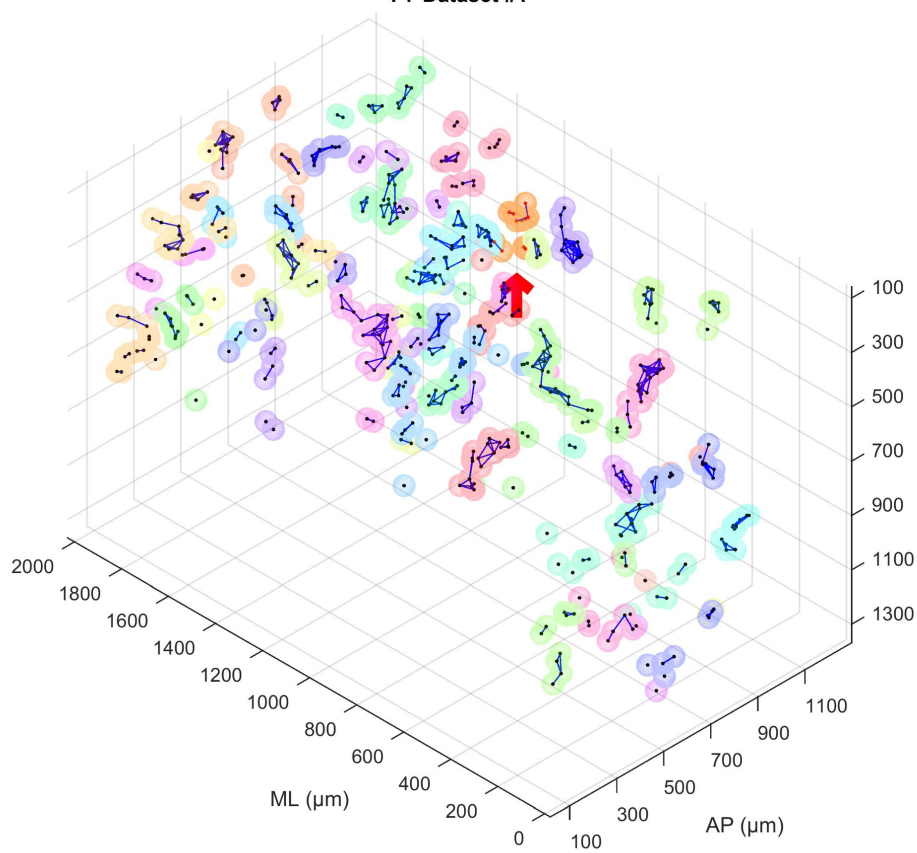

**Clone #28**

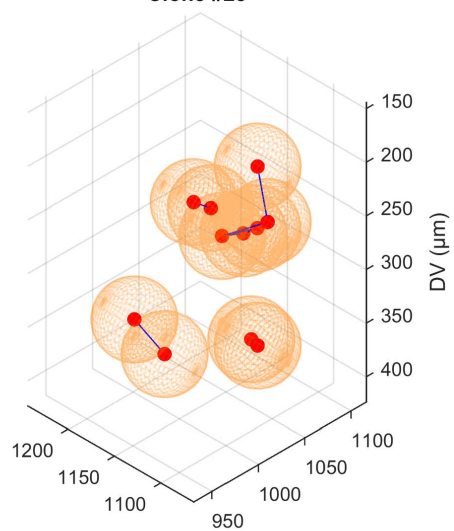

P7 Dataset #1

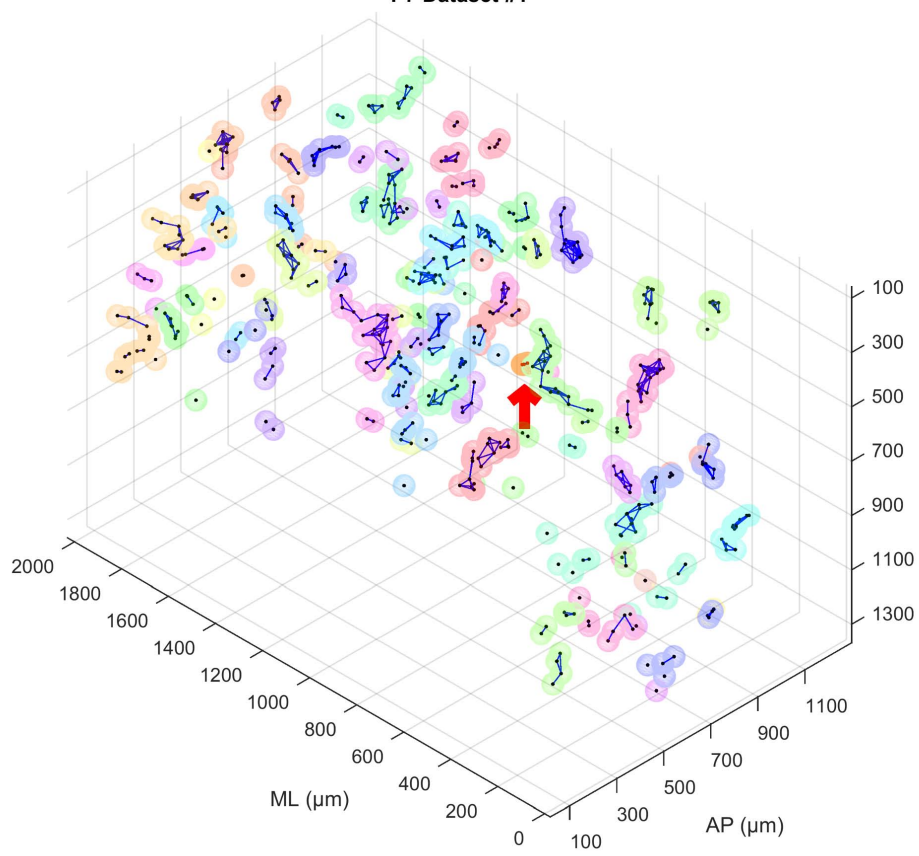

Clone #29

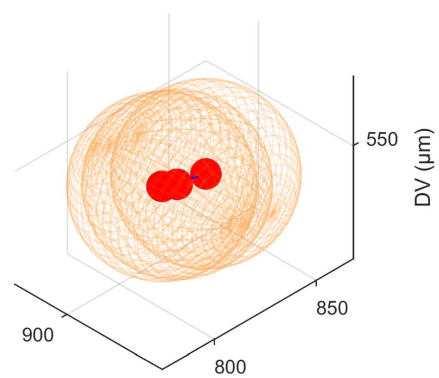

**P7 Dataset #1**

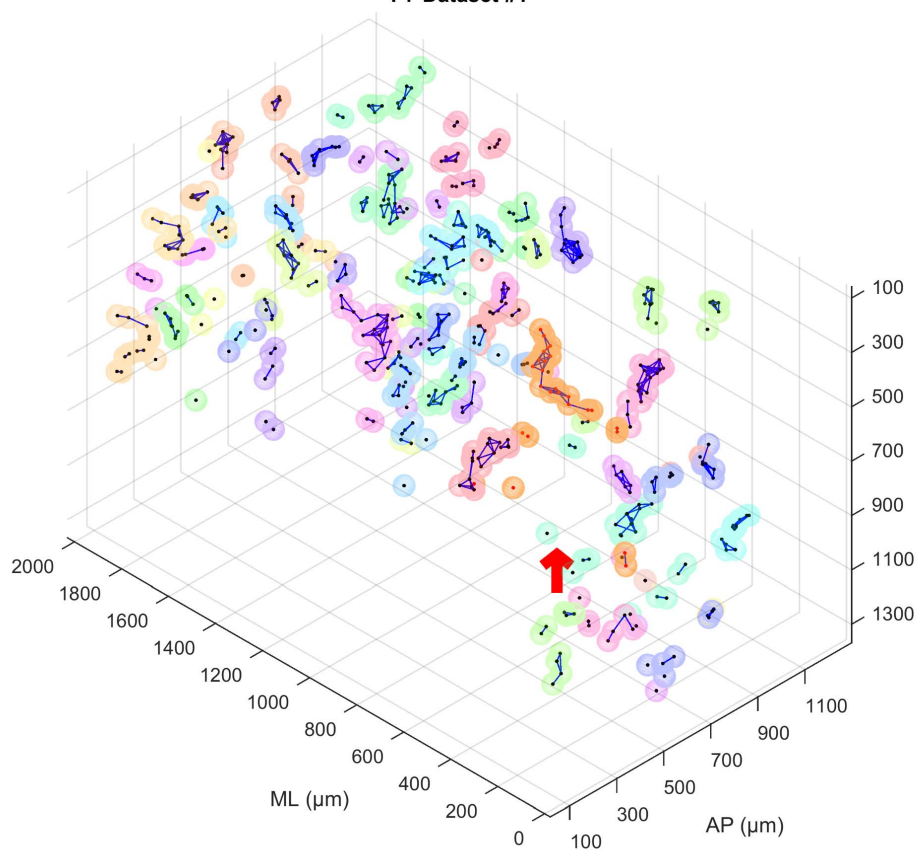

**Clone #30**

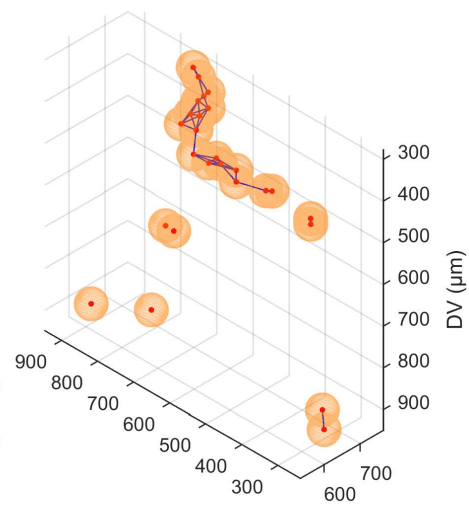

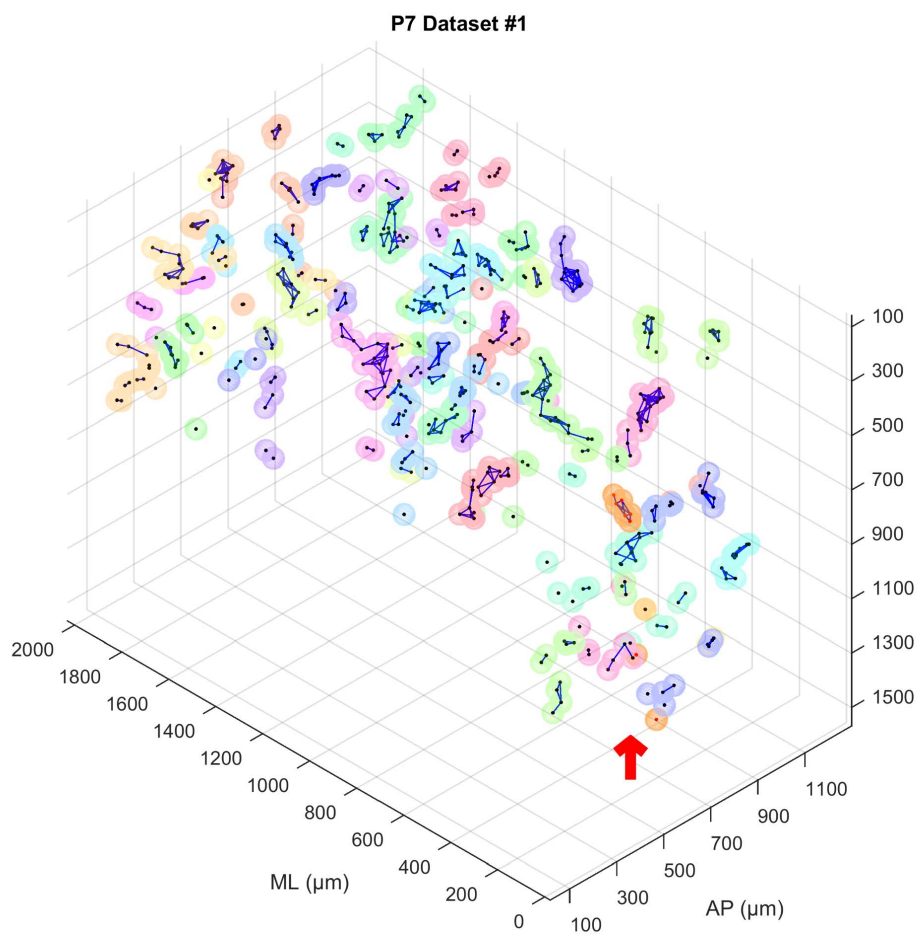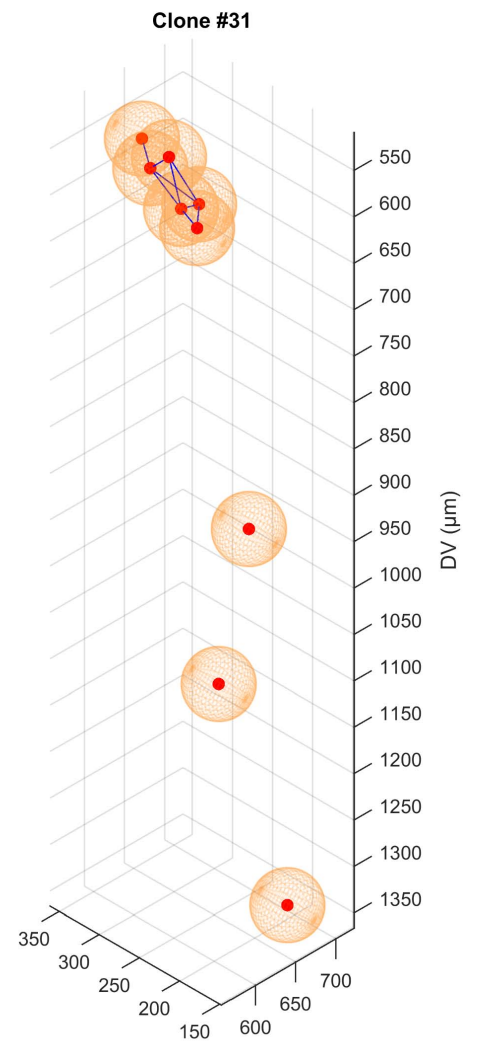



P7 Dataset #1

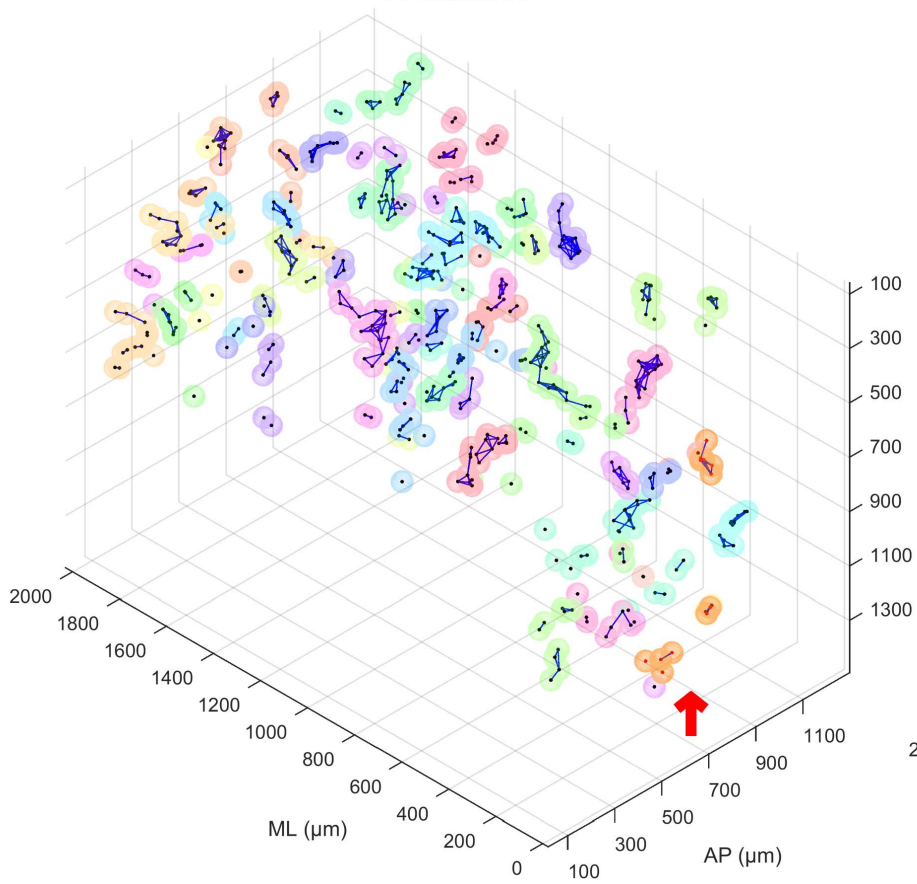

Clone #32

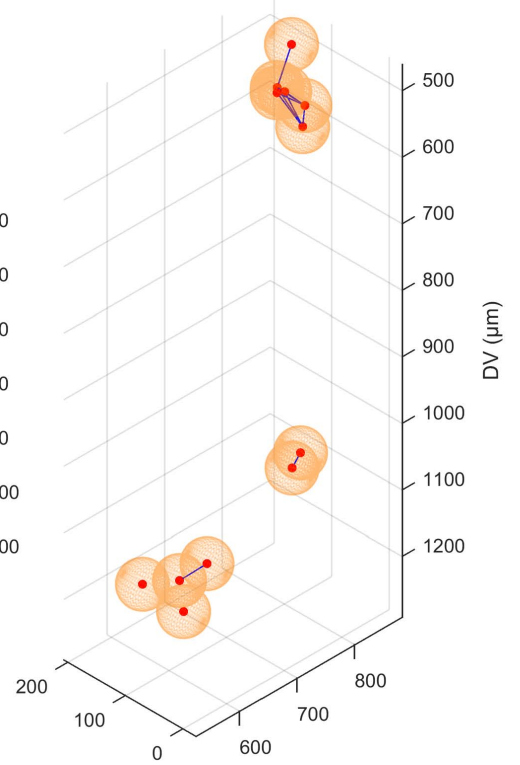

P7 Dataset #1

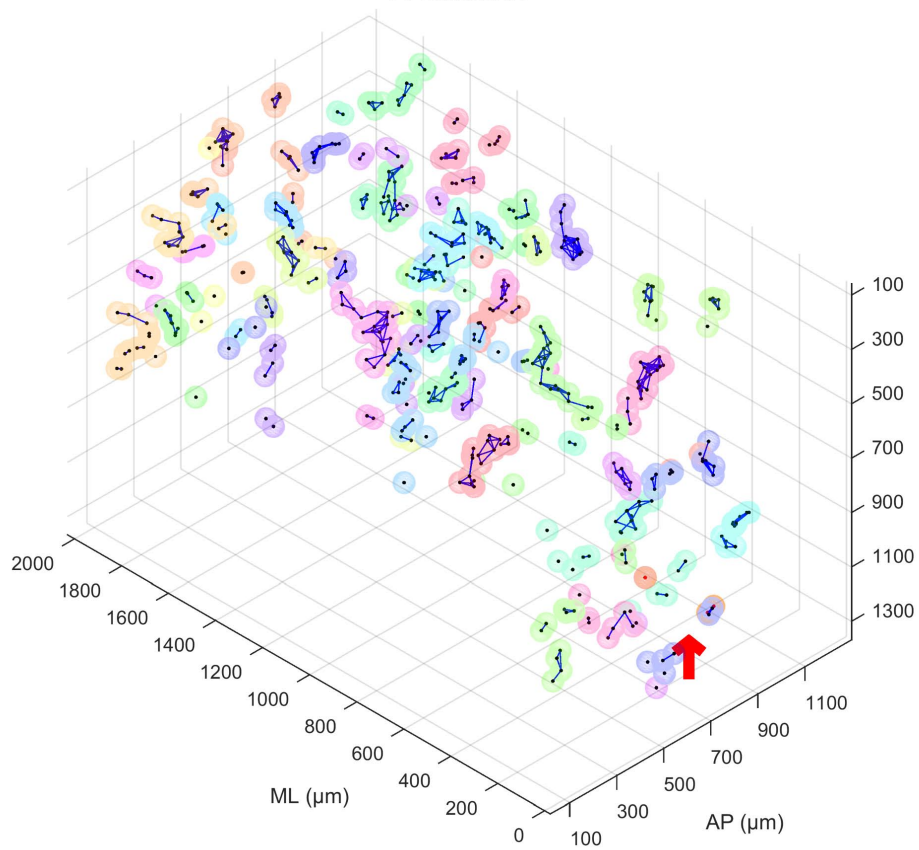

Clone #33

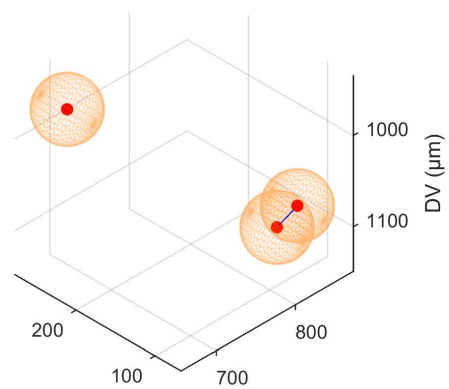

**P7 Dataset #1**

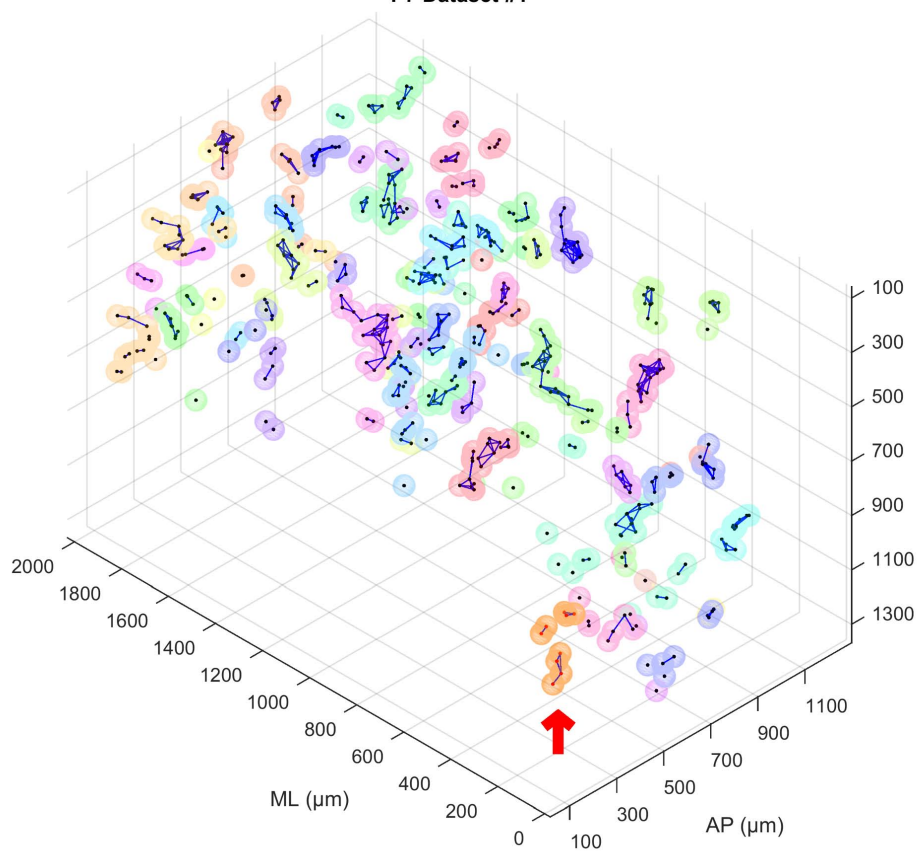

**Clone #34**

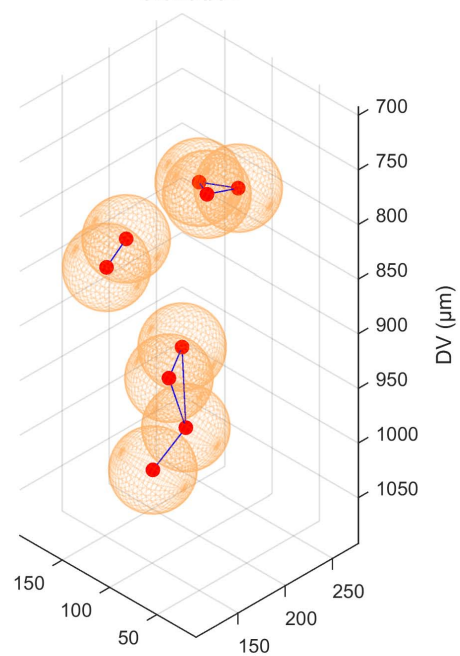

P7 Dataset #1

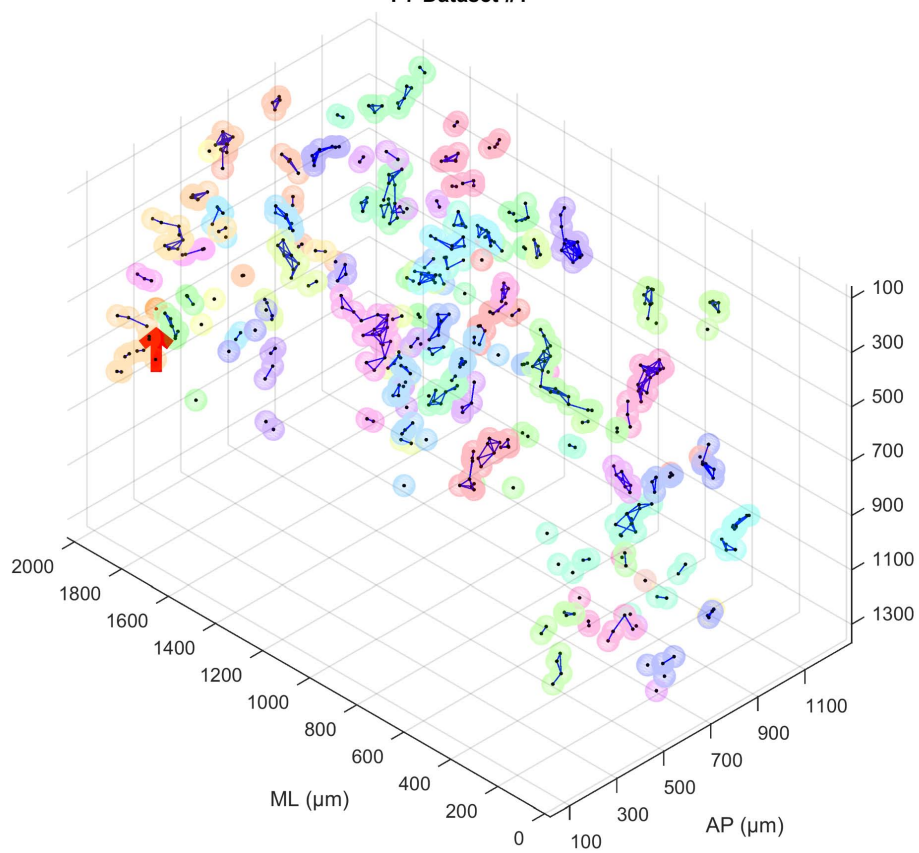

Clone #35

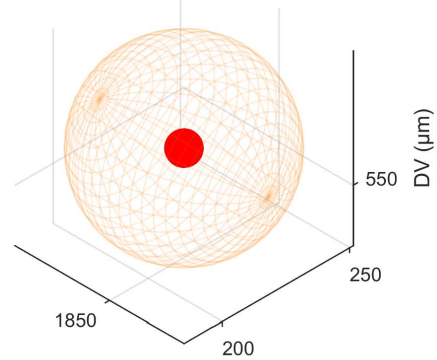

**P7 Dataset #1**

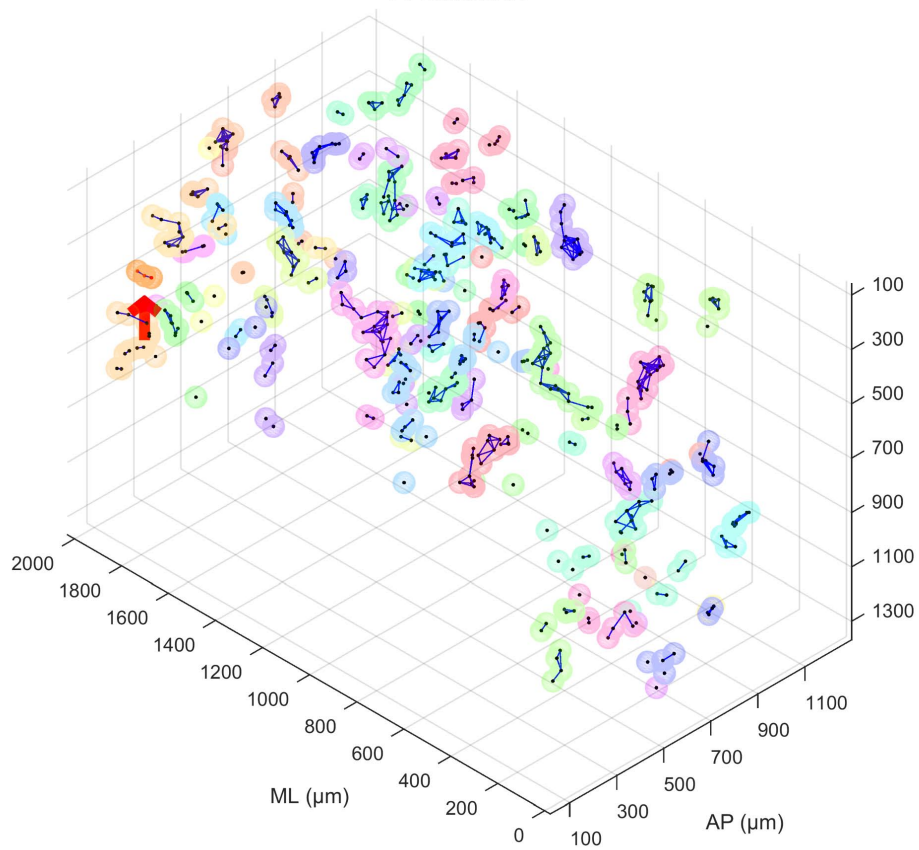

**Clone #36**

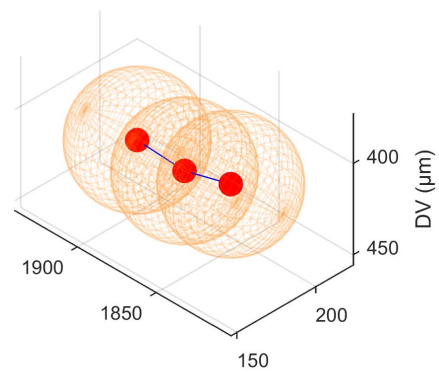

**P7 Dataset #1**

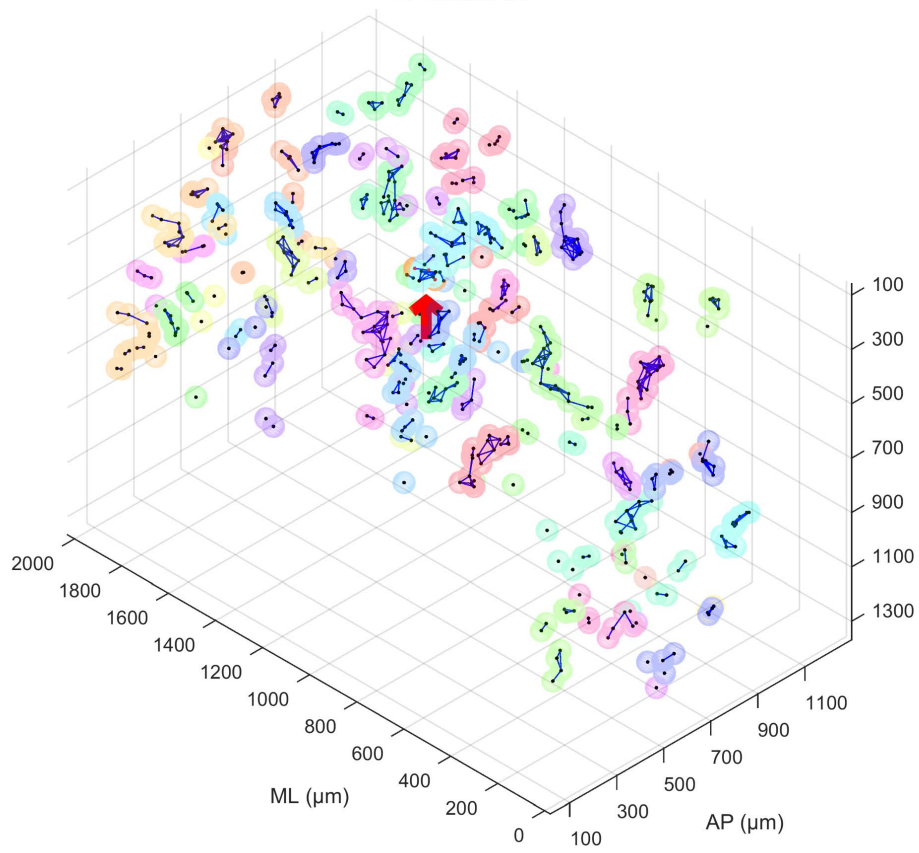

**Clone #37**

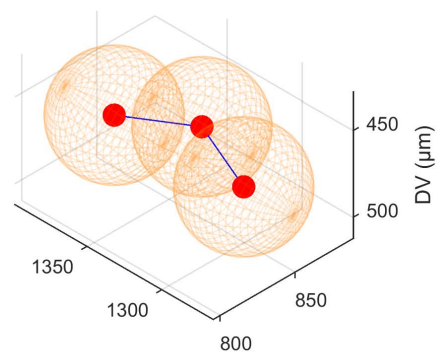

**P7 Dataset #1**

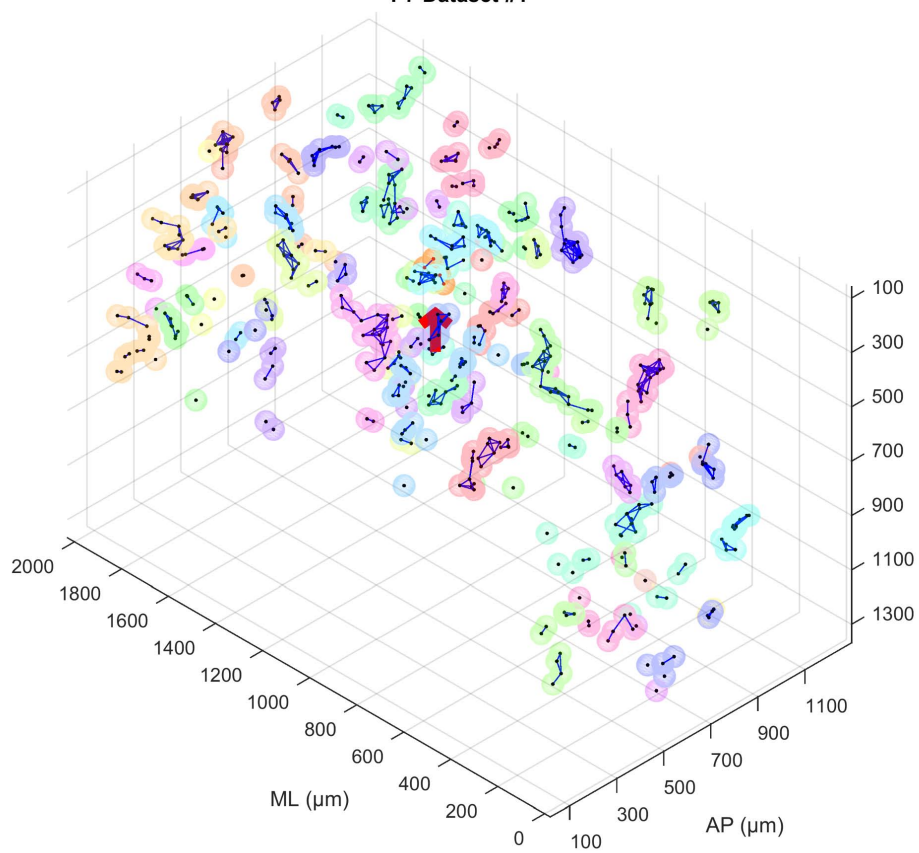

**Clone #38**

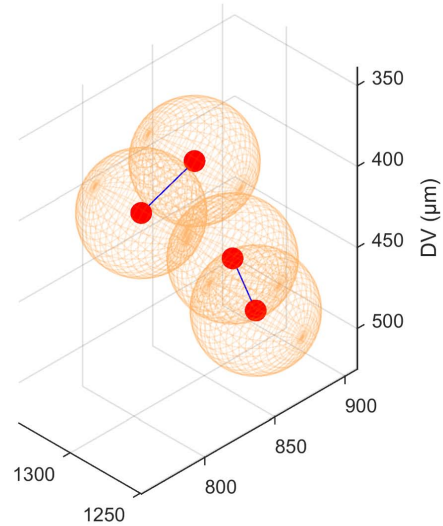

**P7 Dataset #1**

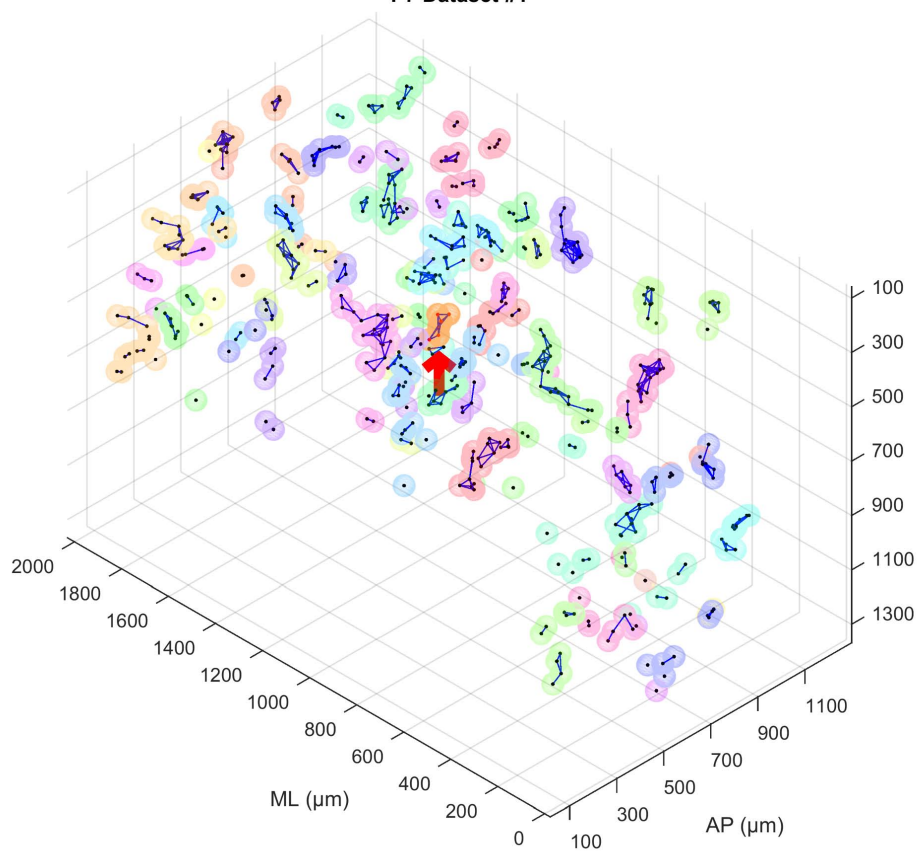

**Clone #39**

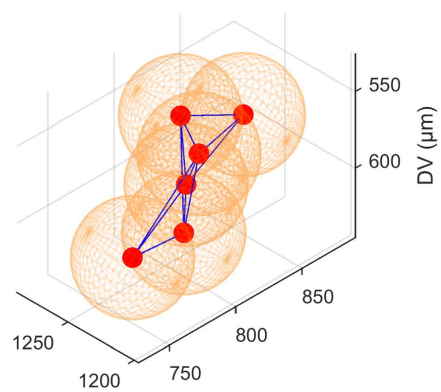



**P7 Dataset #1**

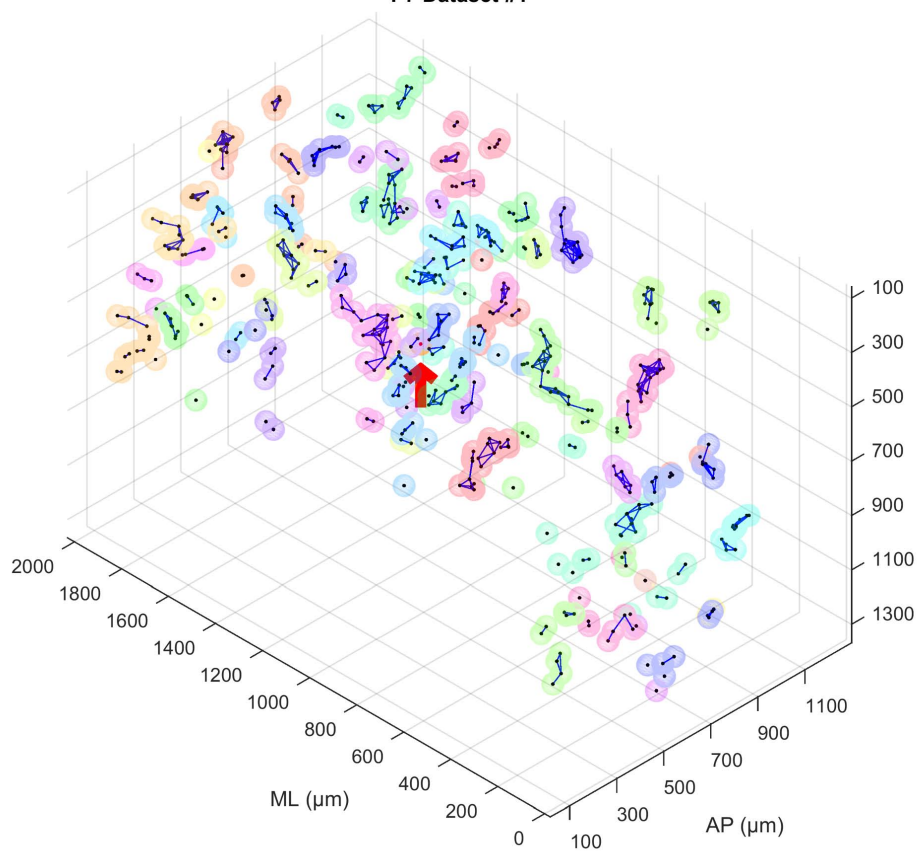

**Clone #40**

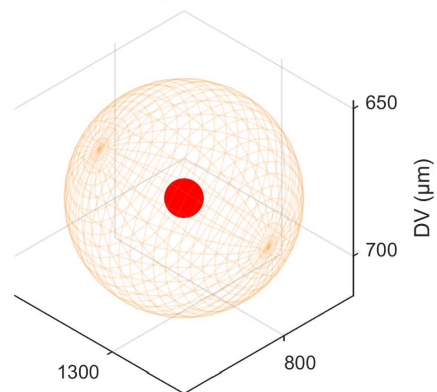

**P7 Dataset #1**

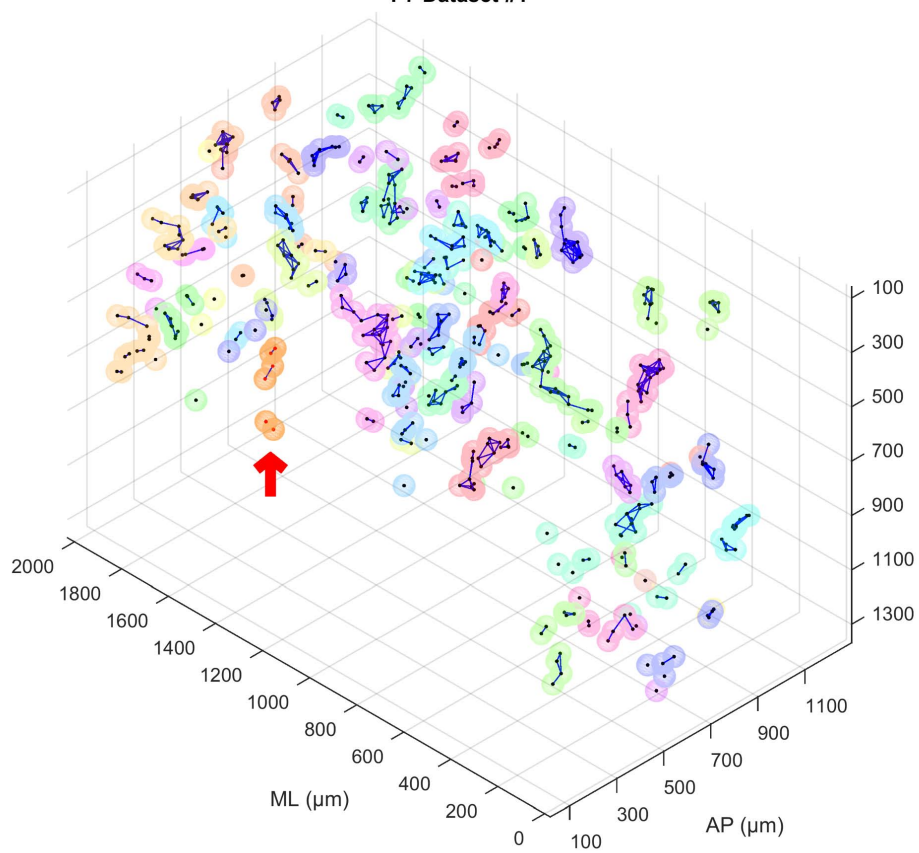

**Clone #41**

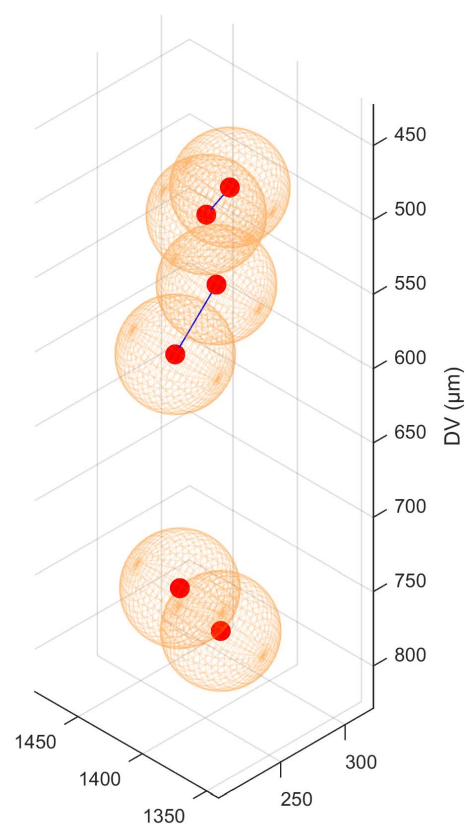

**P7 Dataset #1**

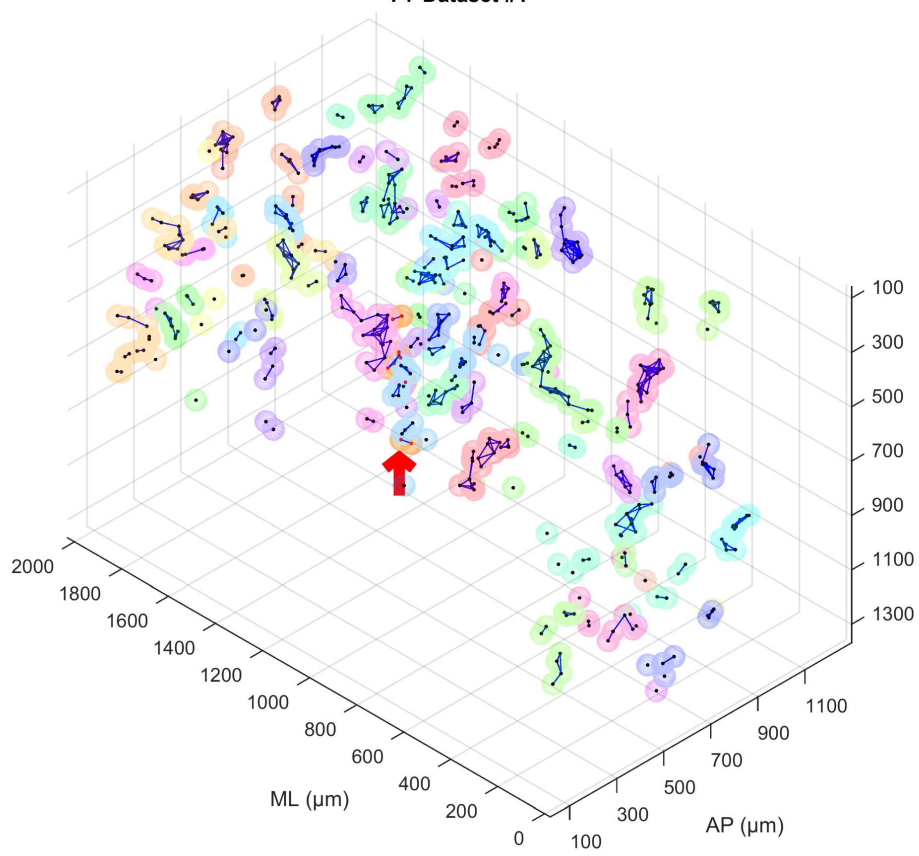

**Clone #42**

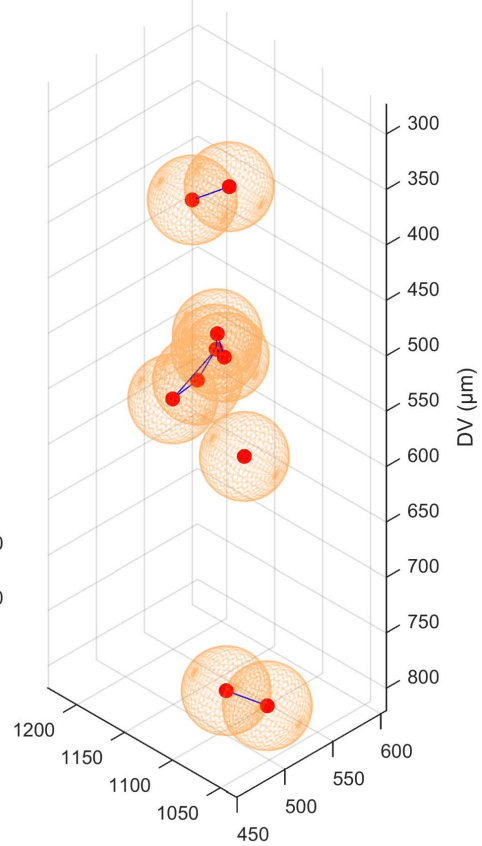

**P7 Dataset #1**

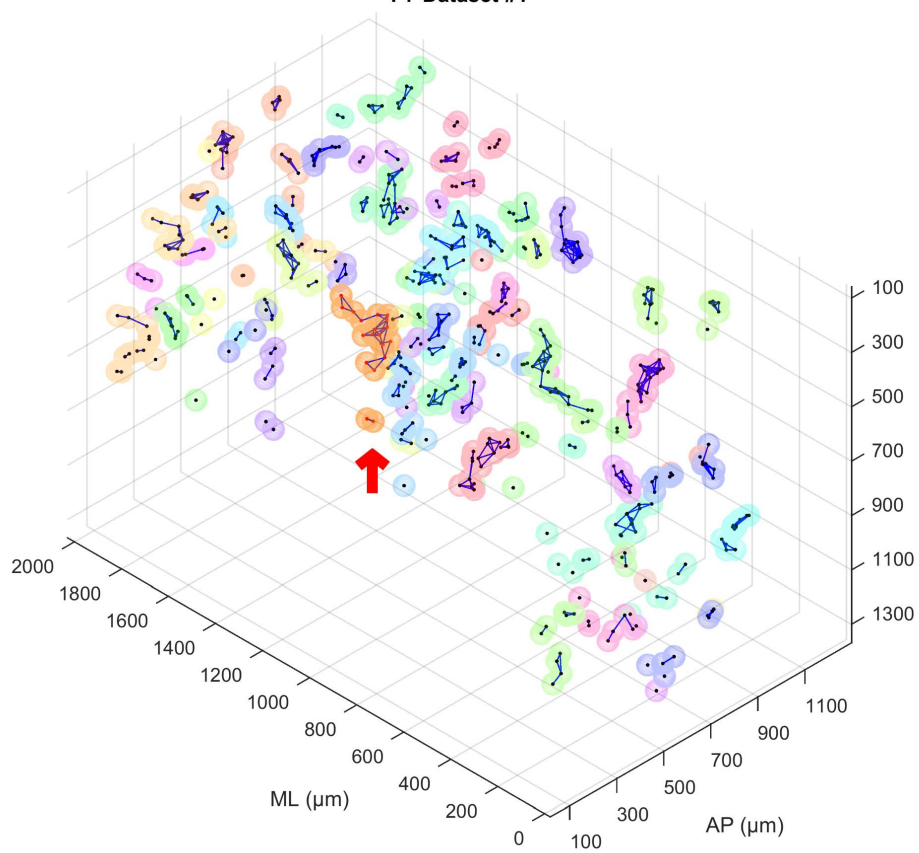

**Clone #43**

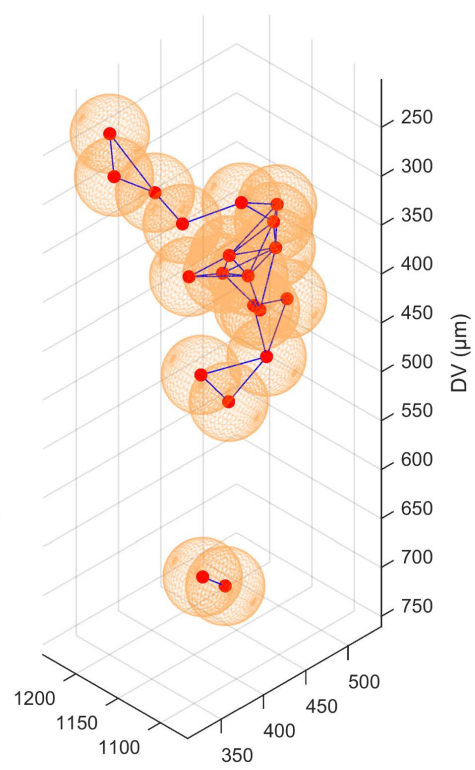

P7 Dataset #1

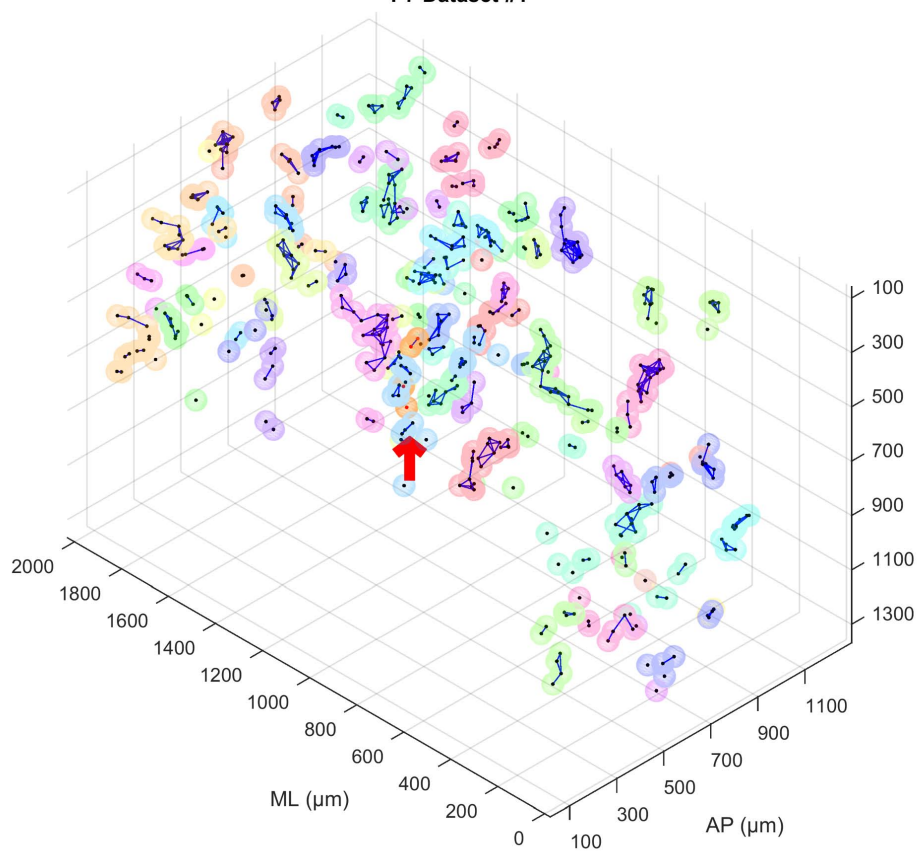

Clone #44

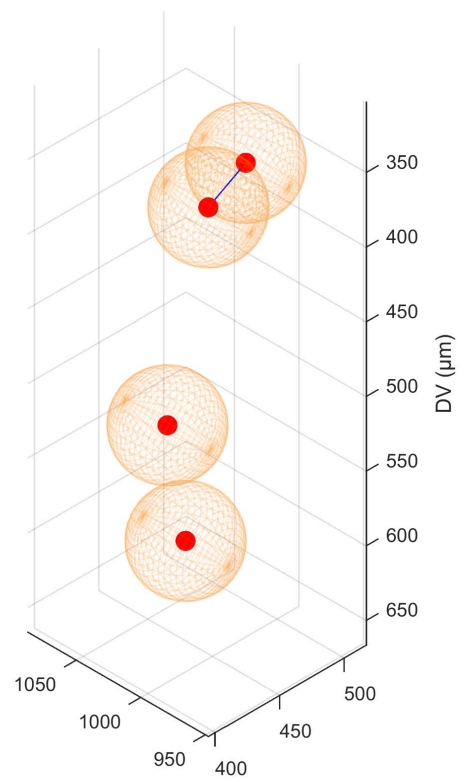

P7 Dataset #1

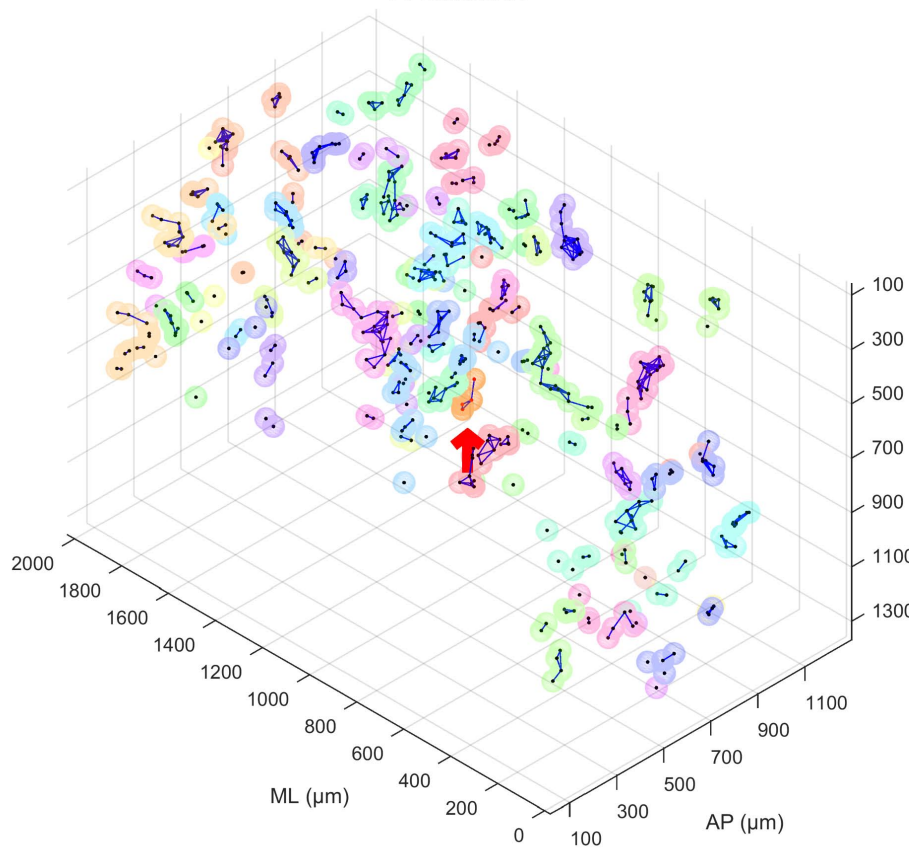

Clone #45

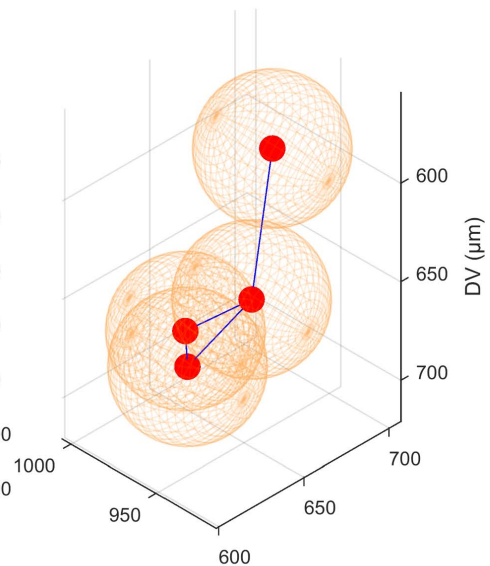

**P7 Dataset #1**

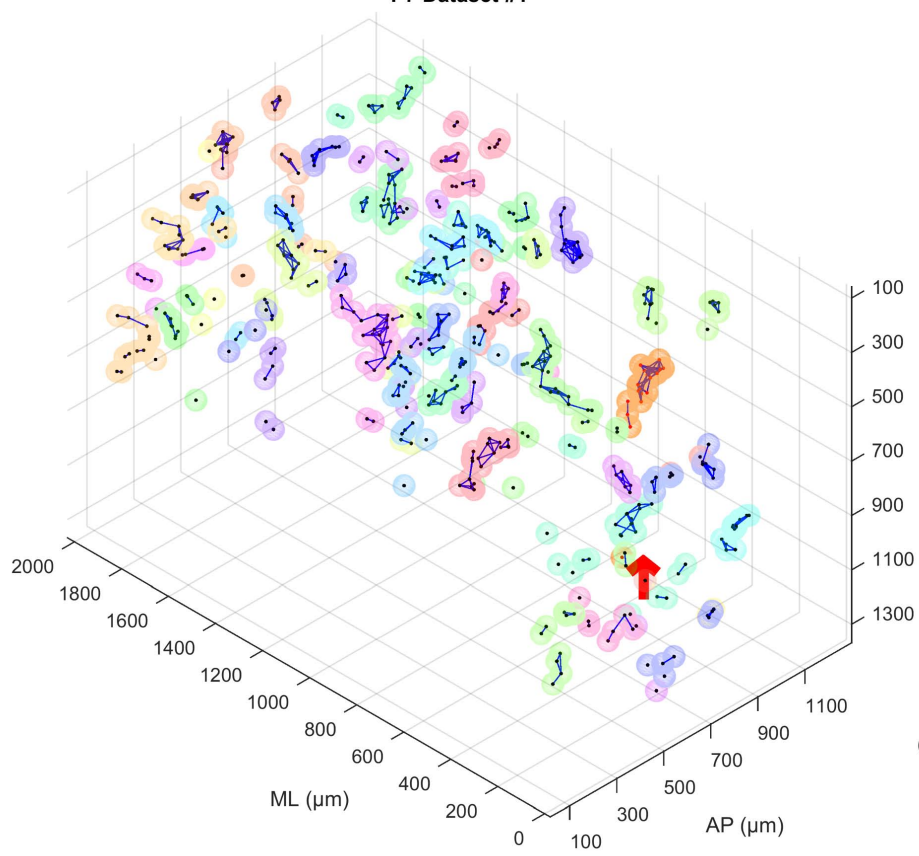

**Clone #46**

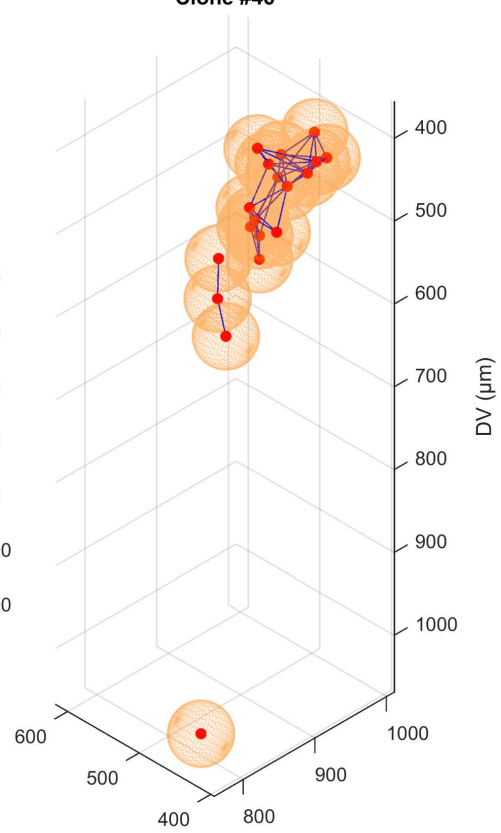

**P7 Dataset #1**

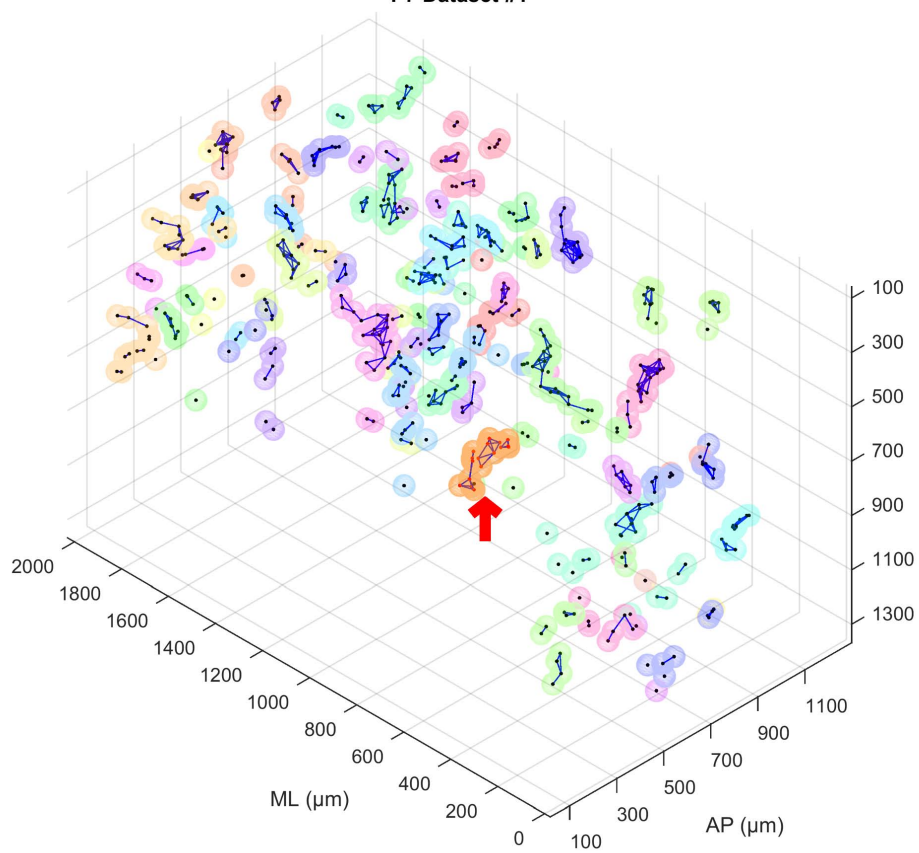

**Clone #47**

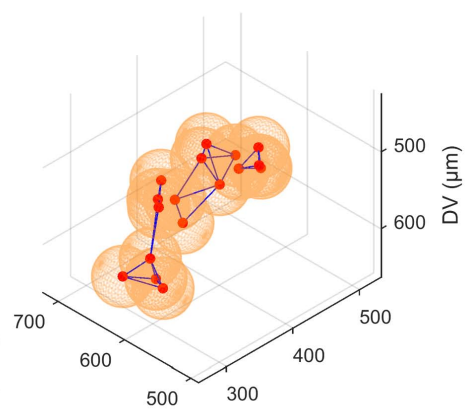



P7 Dataset #1

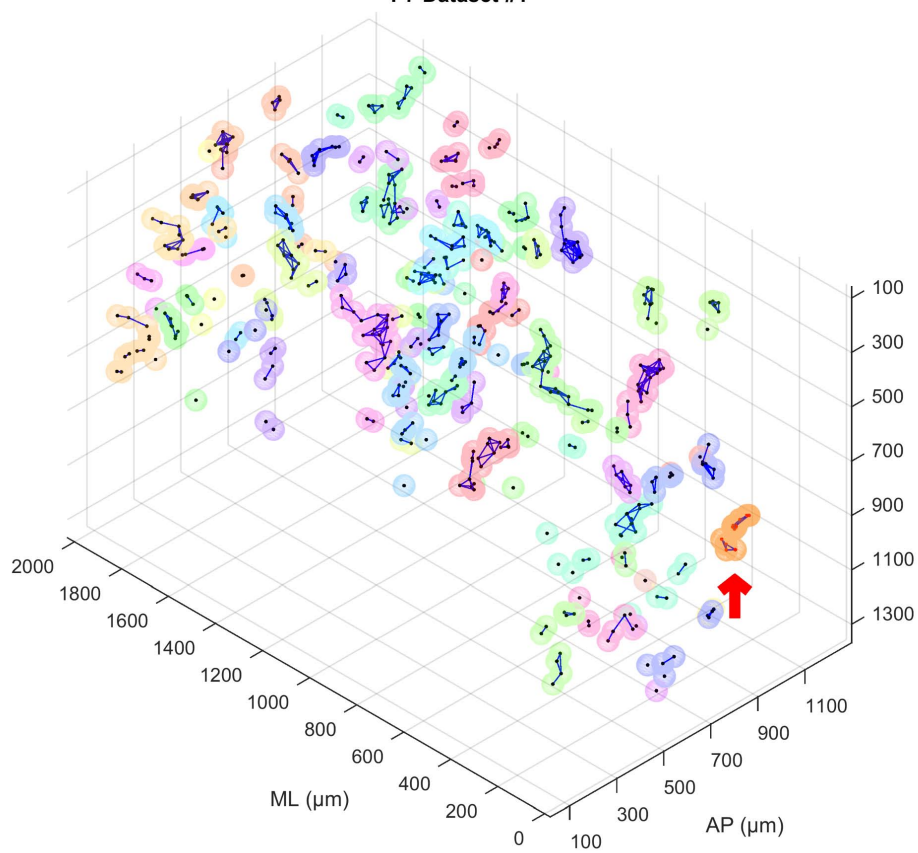

Clone #48

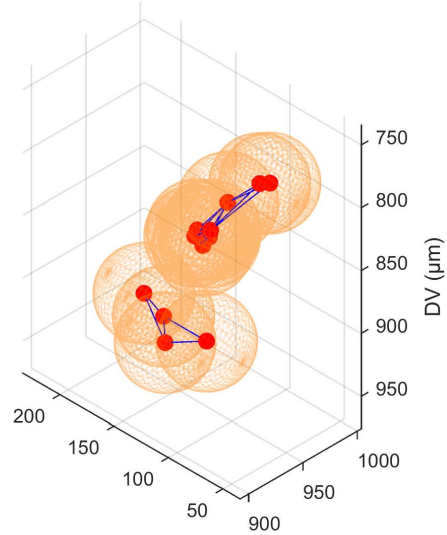

**P7 Dataset #1**

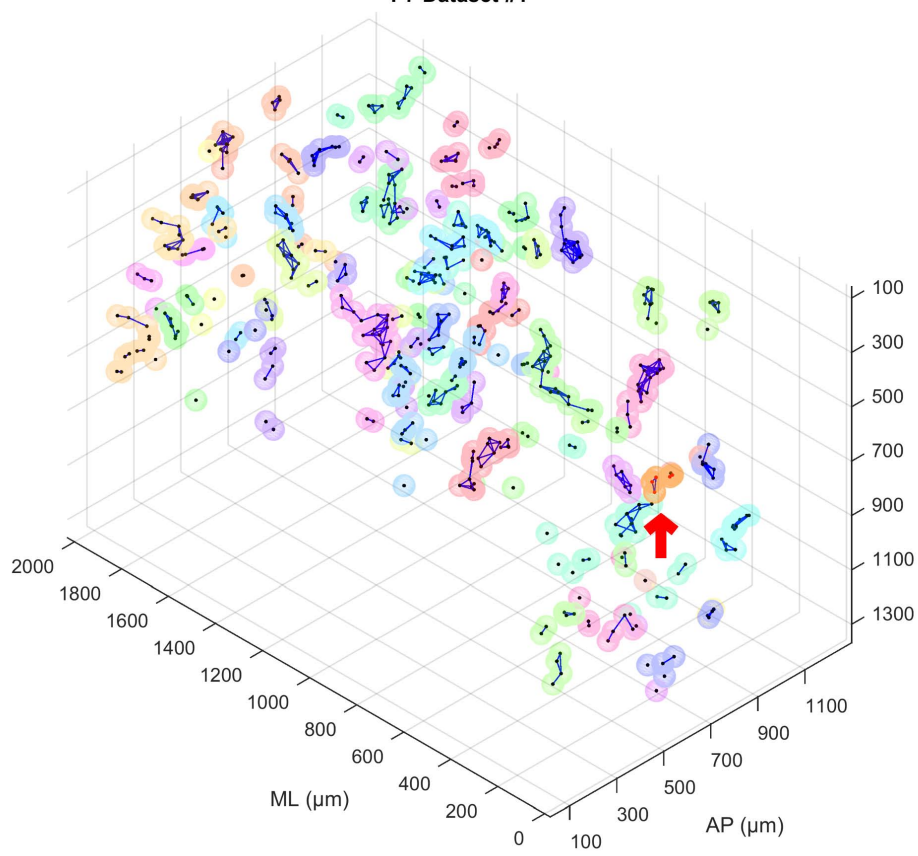

**Clone #49**

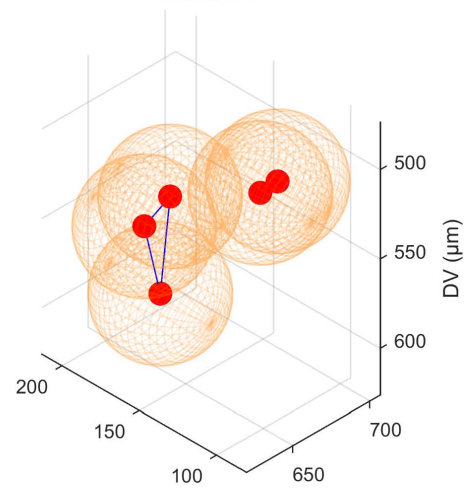

**P7 Dataset #1**

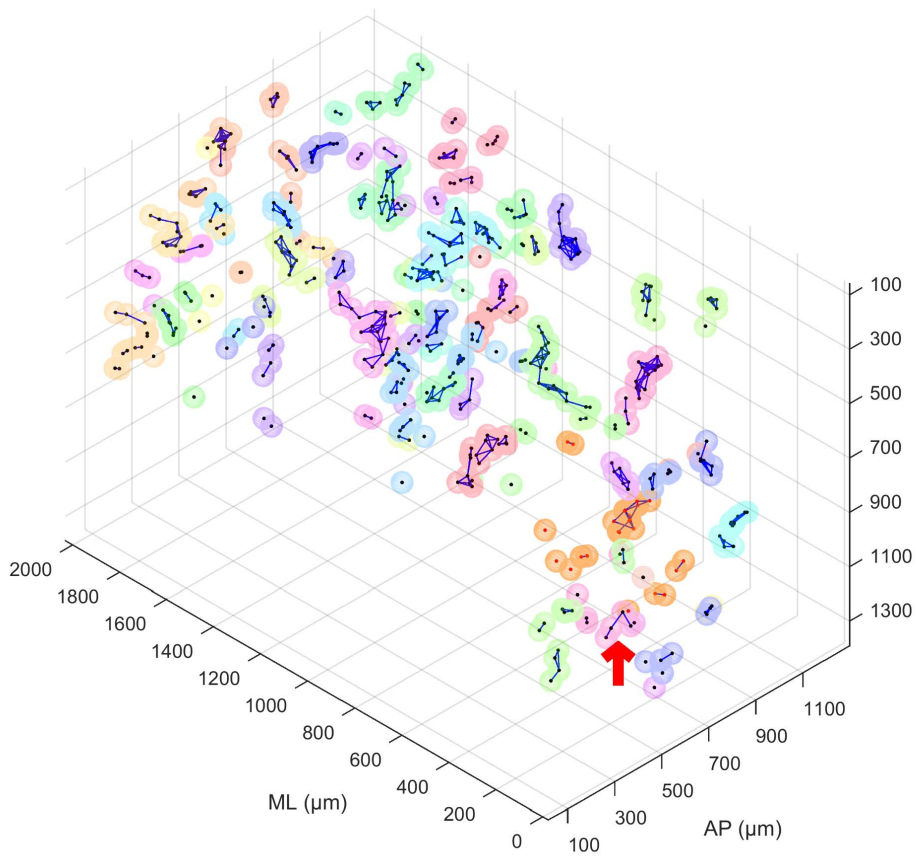

**Clone #50**

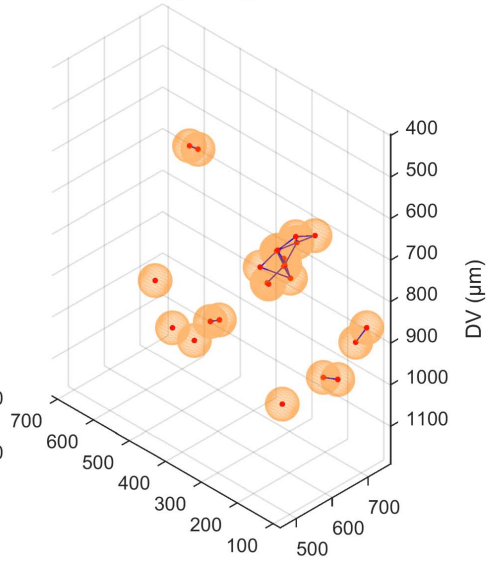

**P7 Dataset #1**

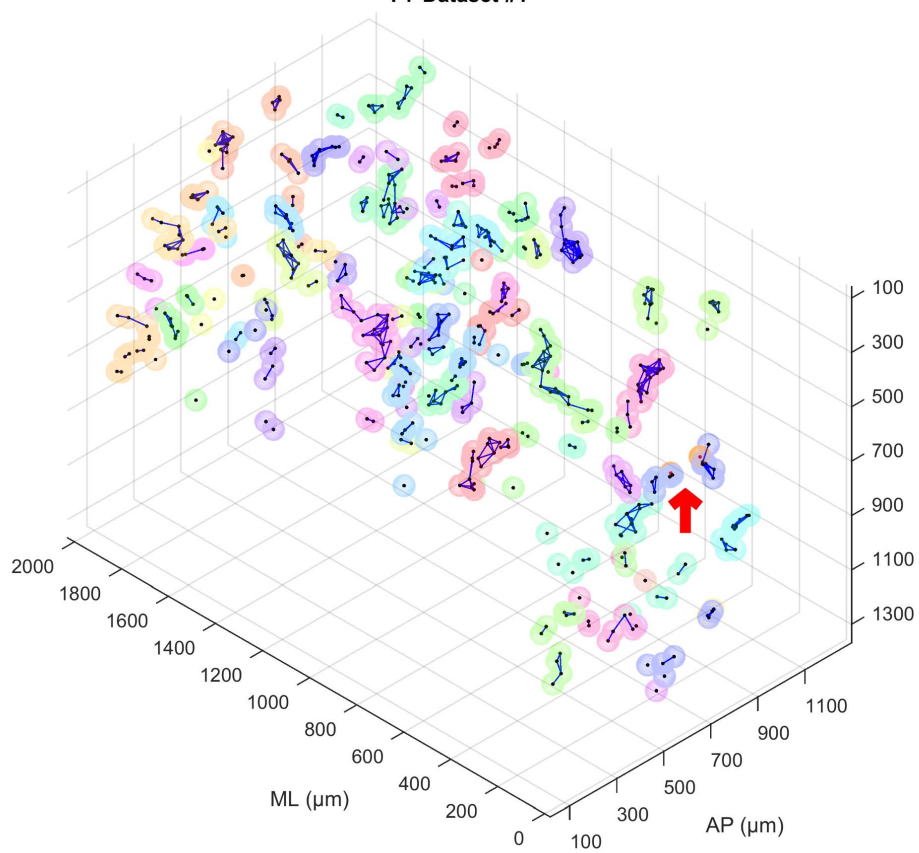

**Clone #51**

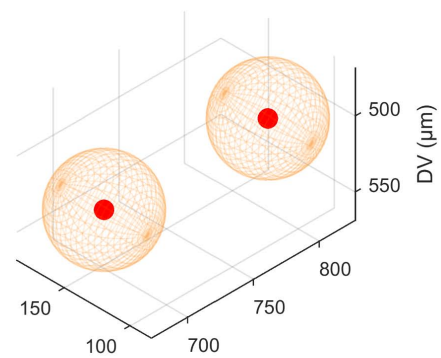

**P7 Dataset #1**

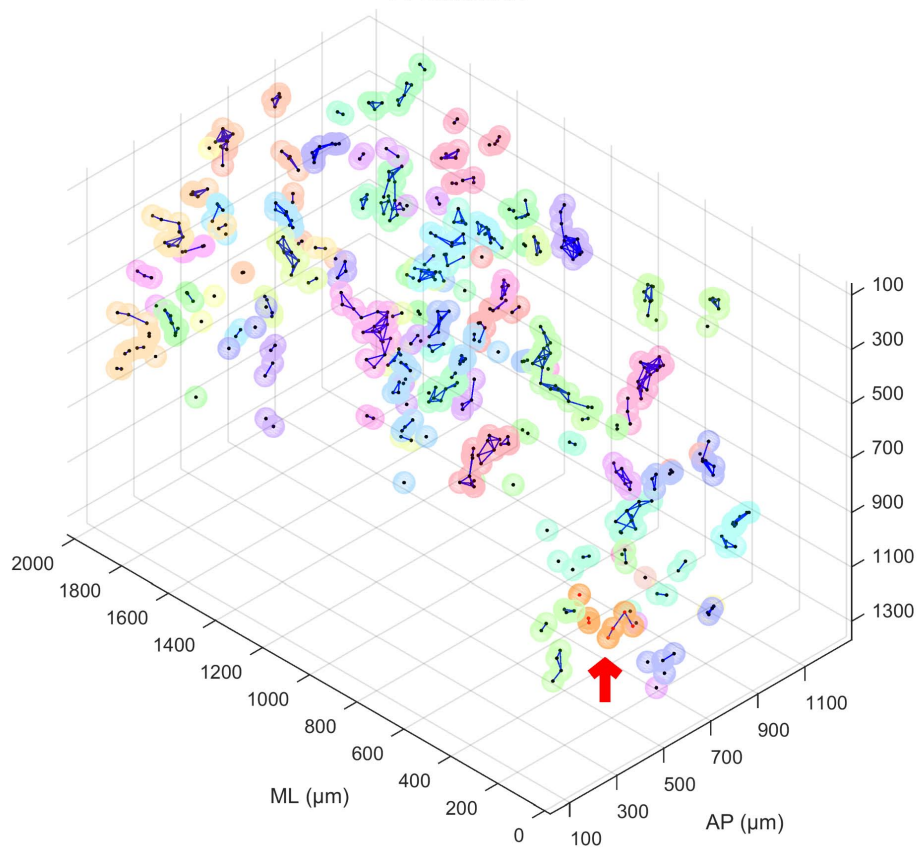

**Clone #52**

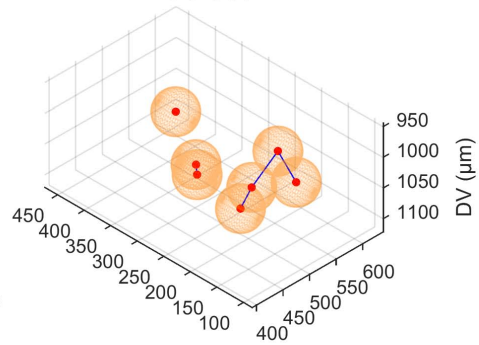

**P7 Dataset #1**

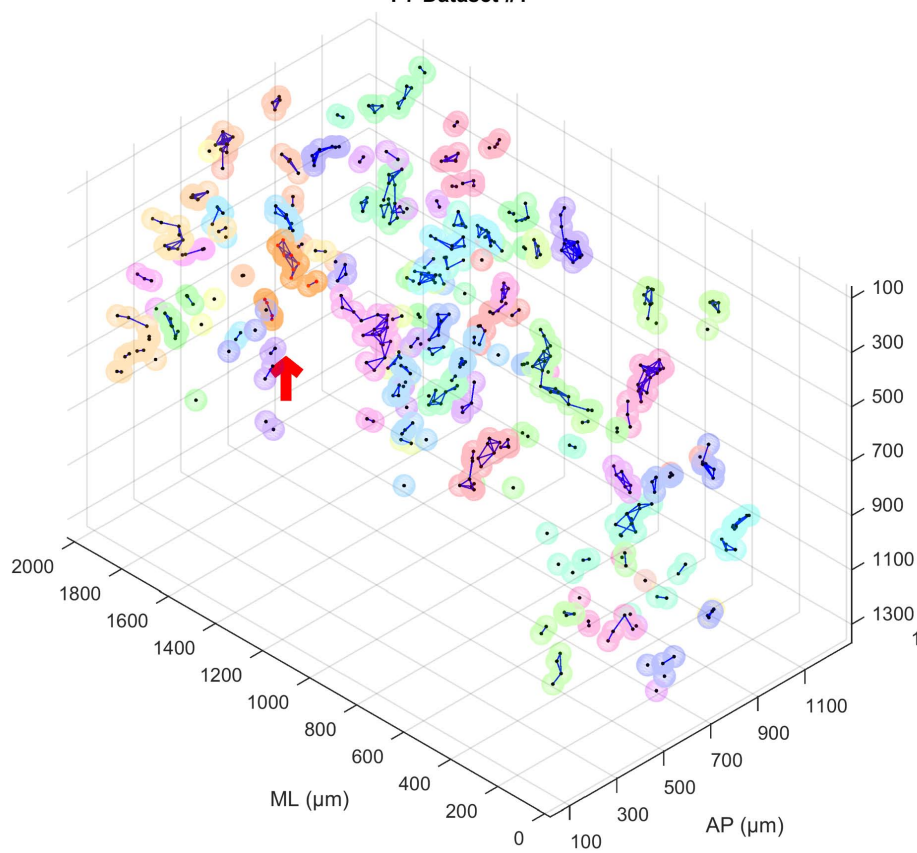

**Clone #53**

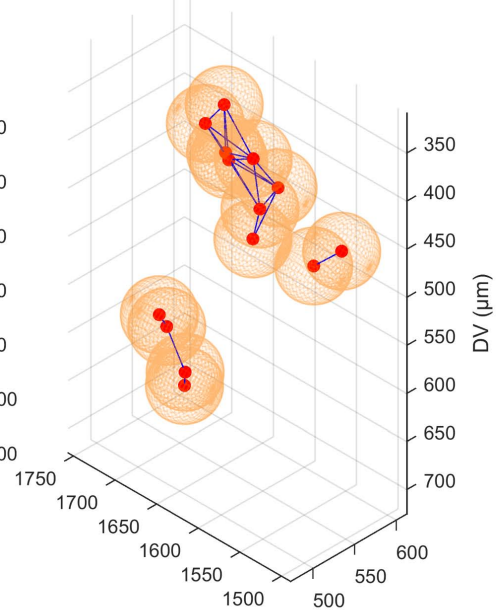

P7 Dataset #1

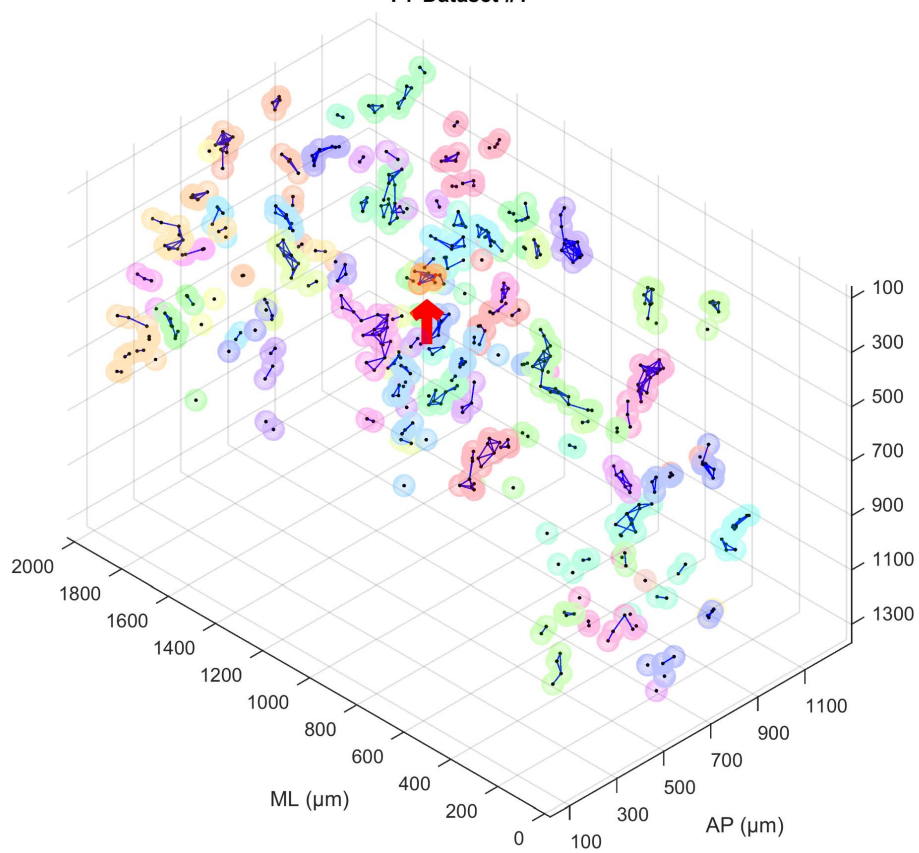

Clone #54

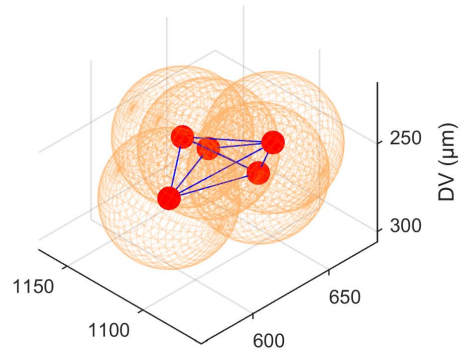

P7 Dataset #1

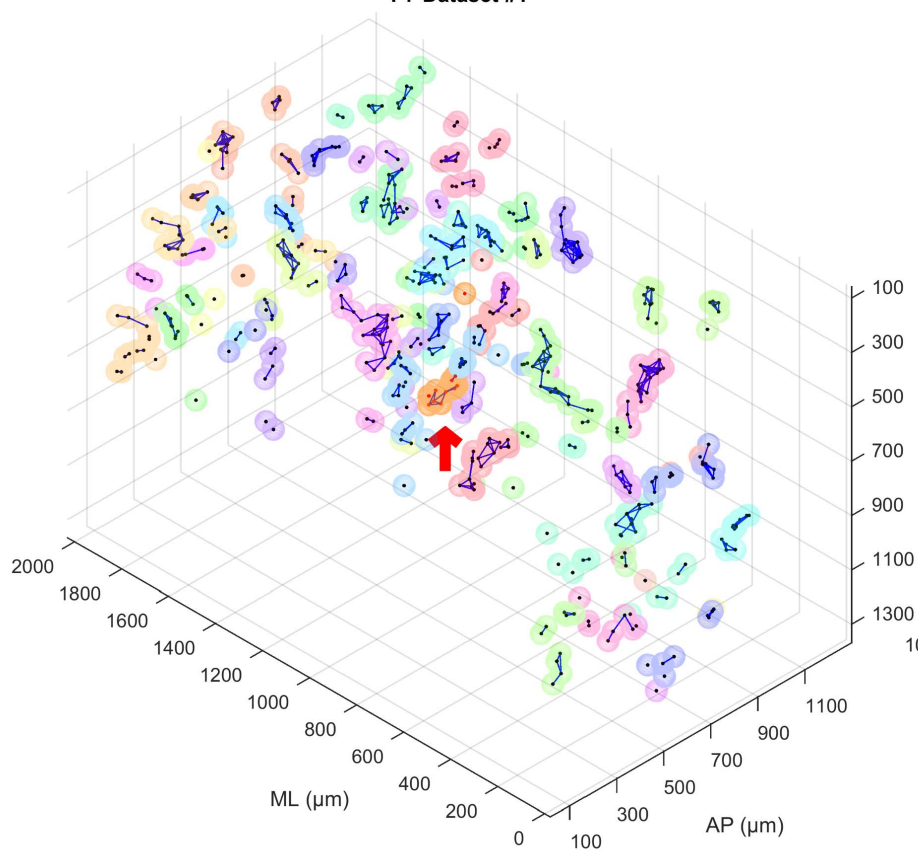

Clone #55

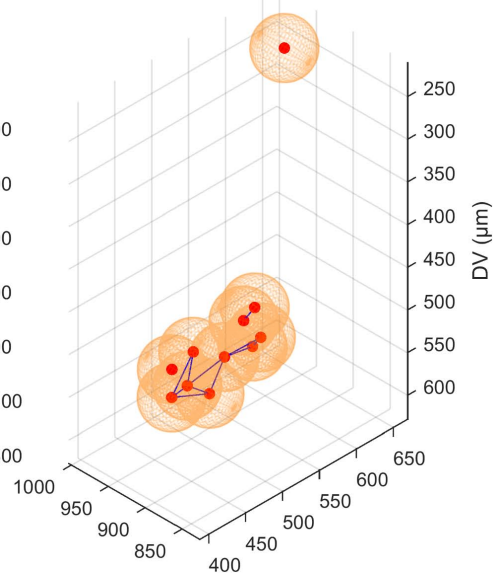



P7 Dataset #1

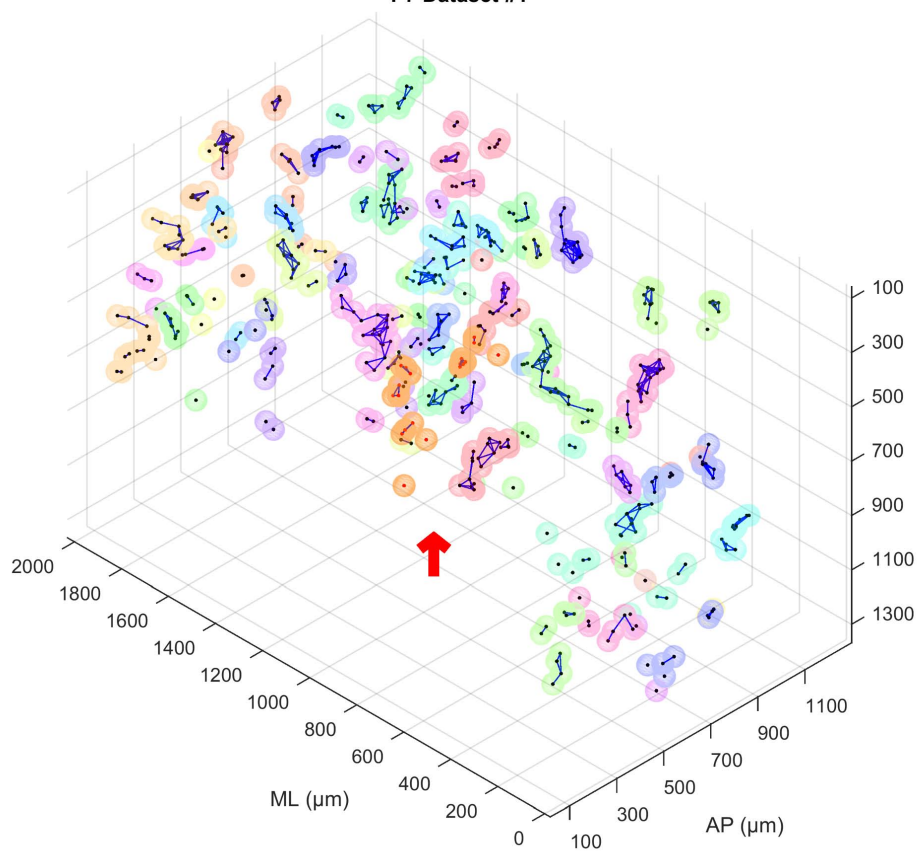

Clone #56

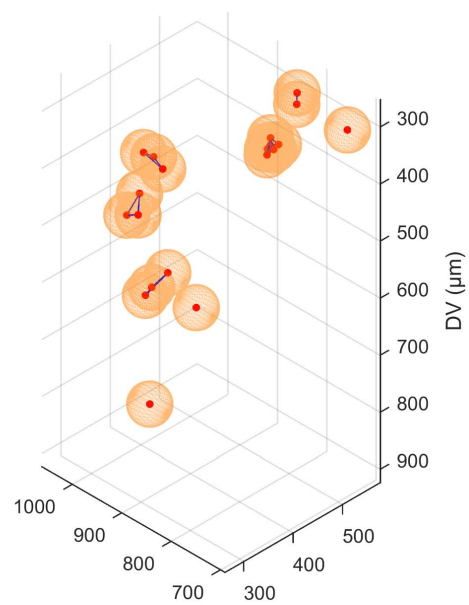

**P7 Dataset #1**

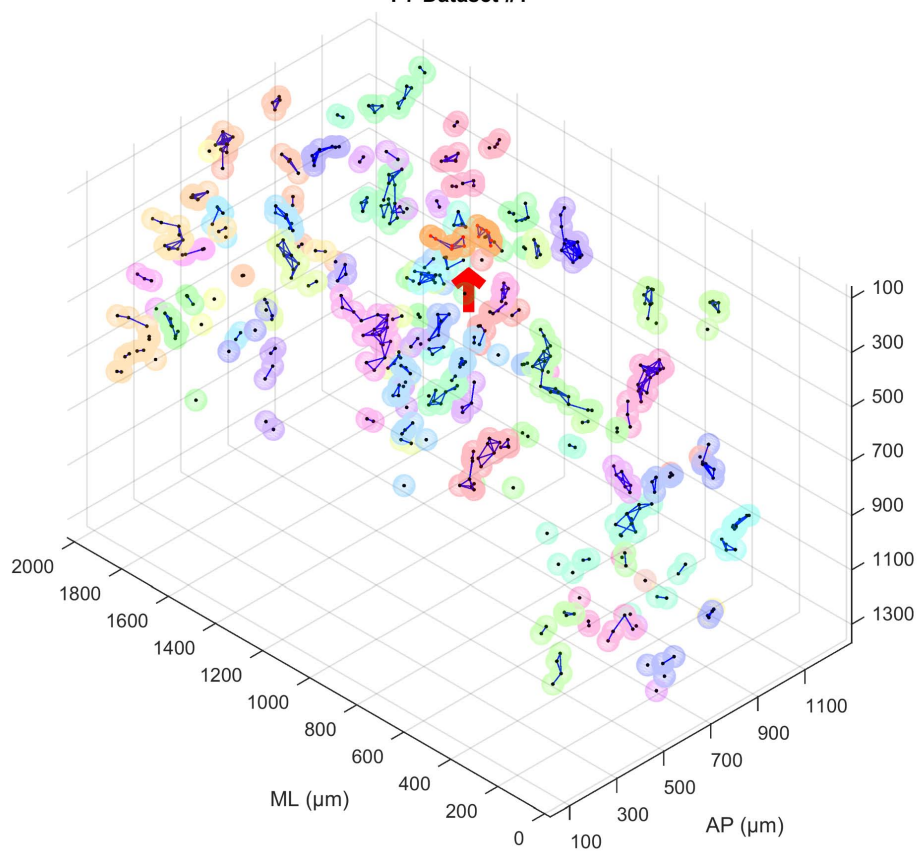

**Clone #57**

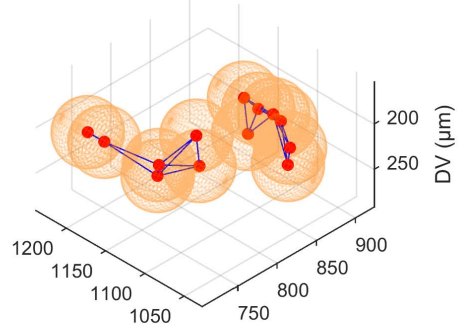

**P7 Dataset #1**

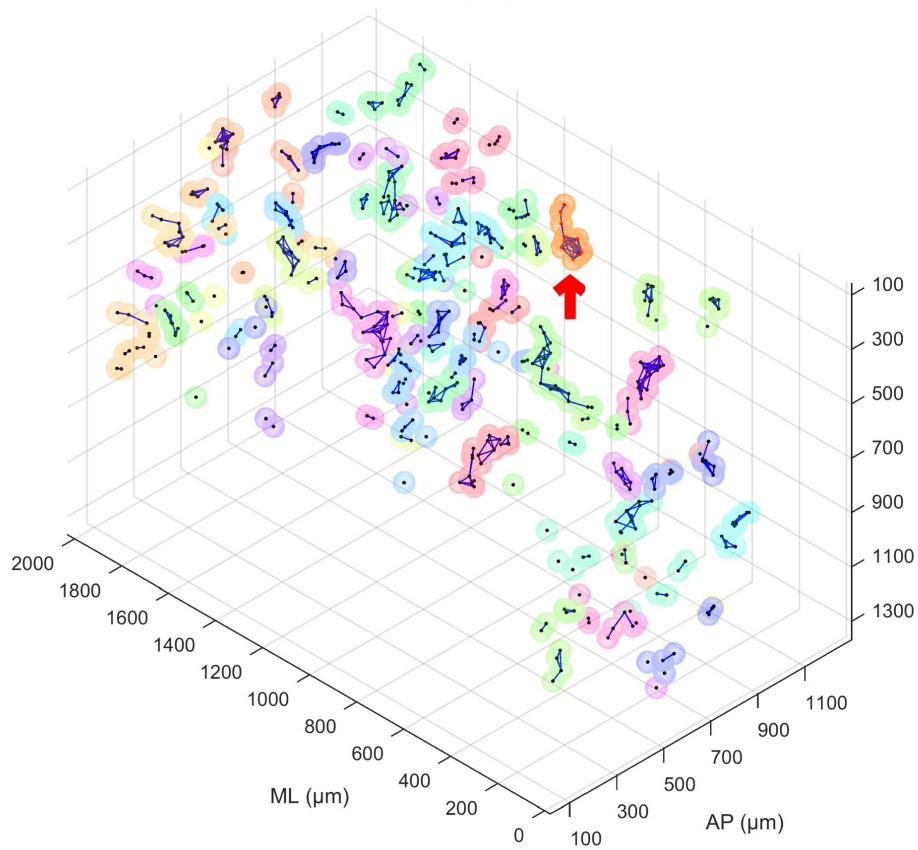

**Clone #58**

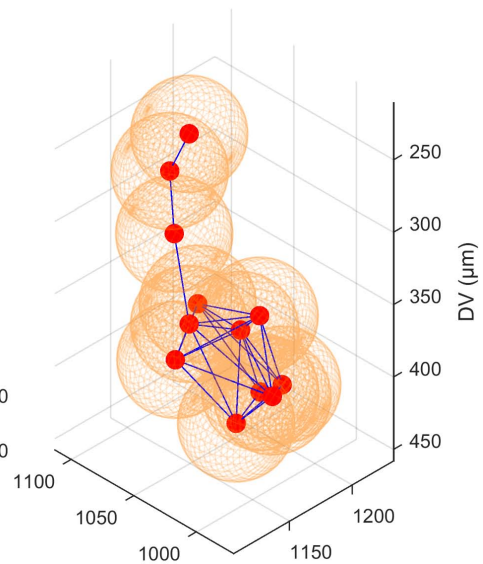

**P7 Dataset #1**

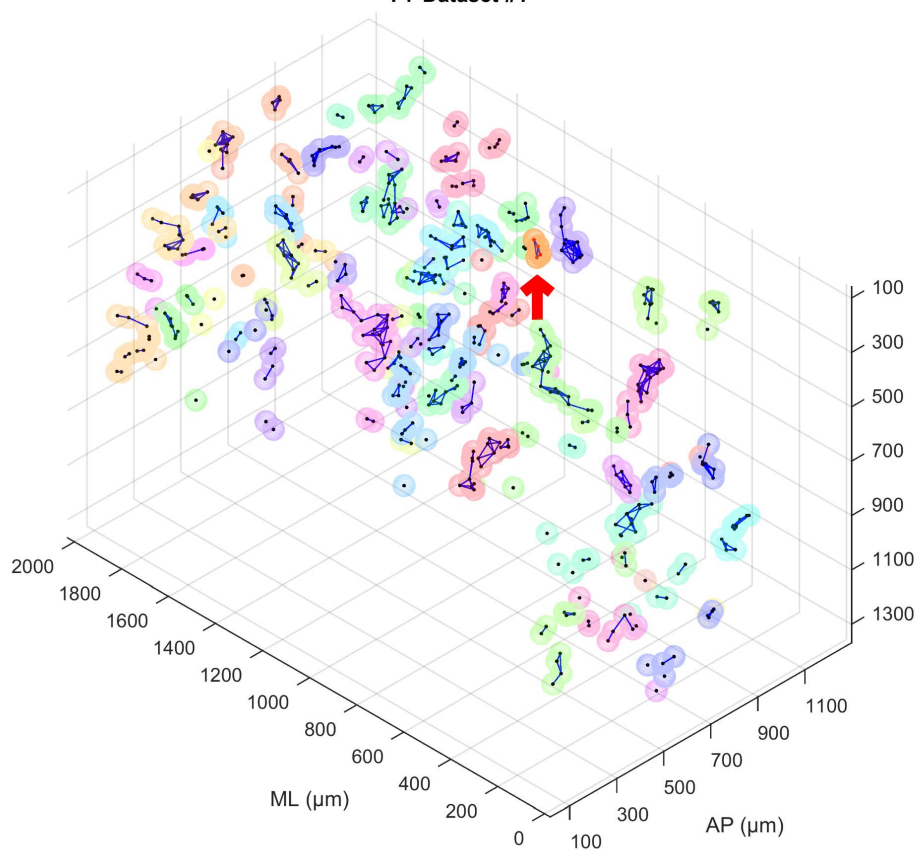

**Clone #59**

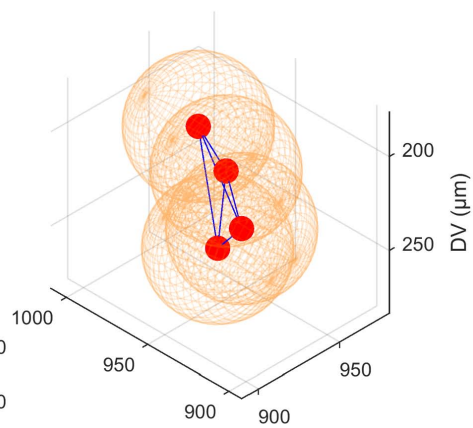

P7 Dataset #1

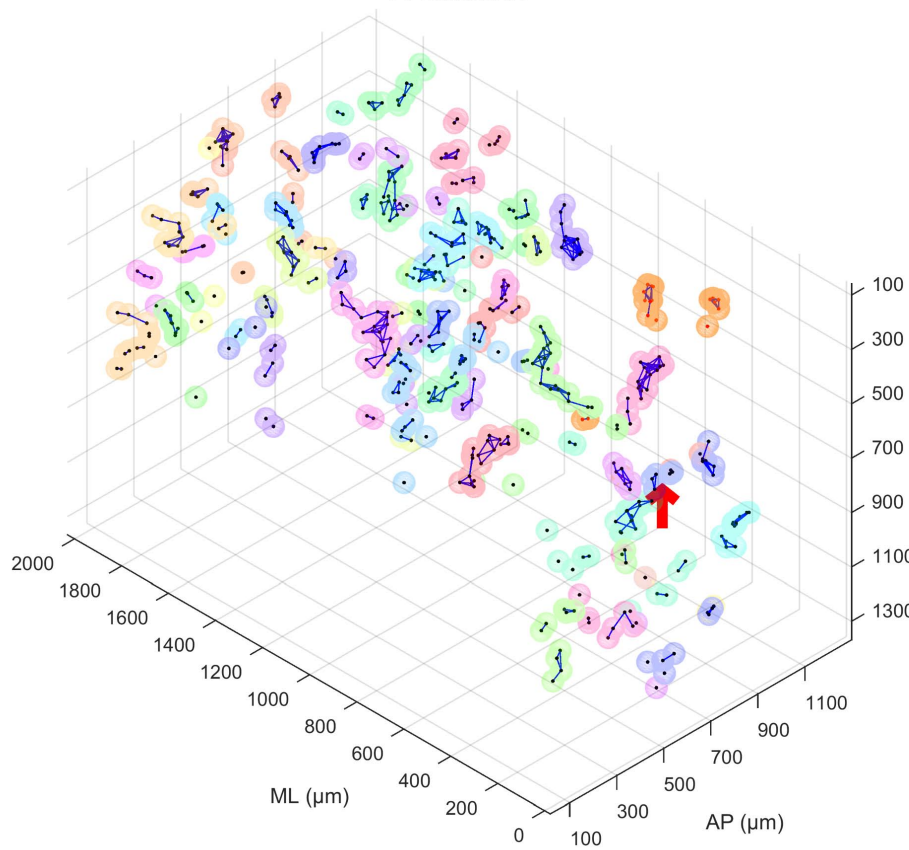

Clone #60

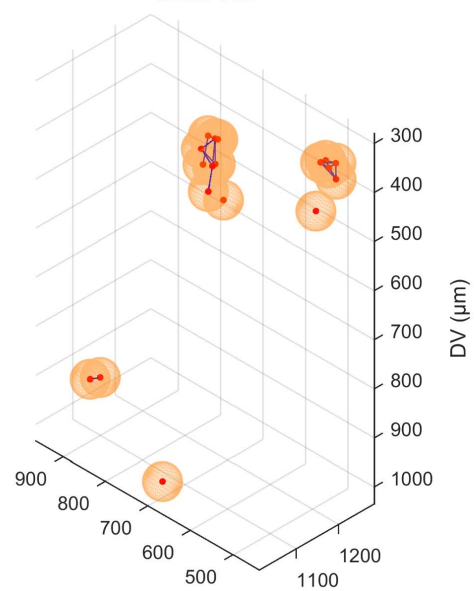

**P7 Dataset #2**

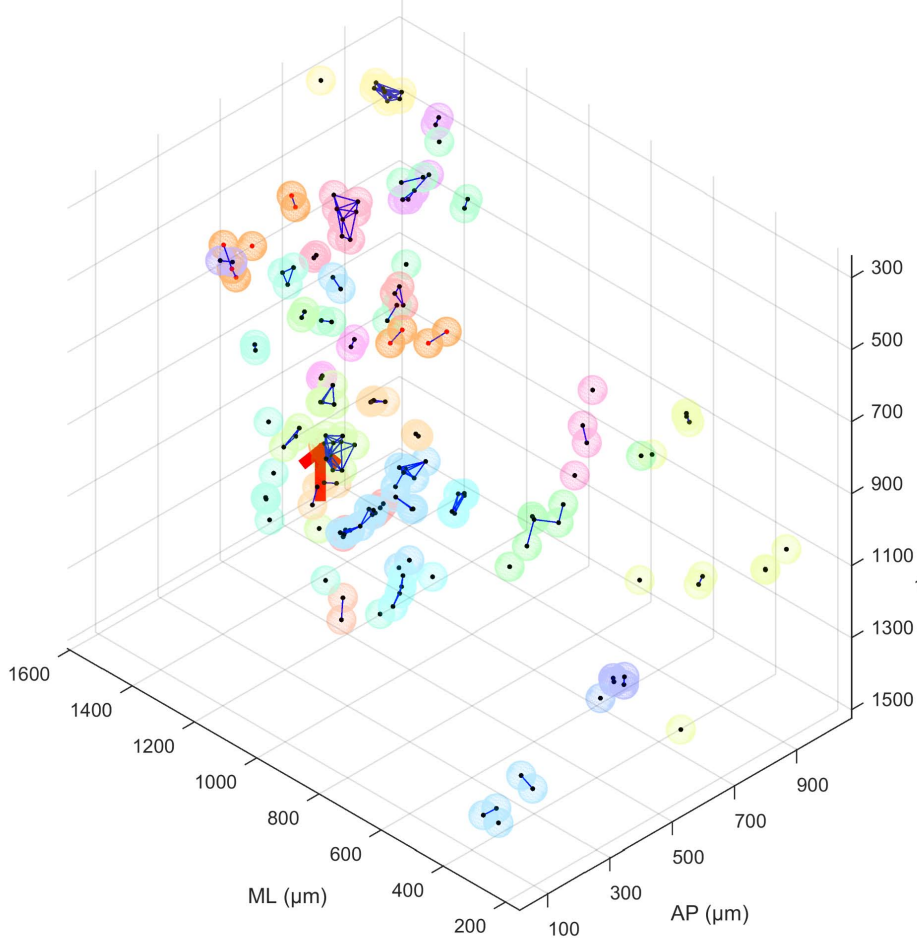

**Clone #1**

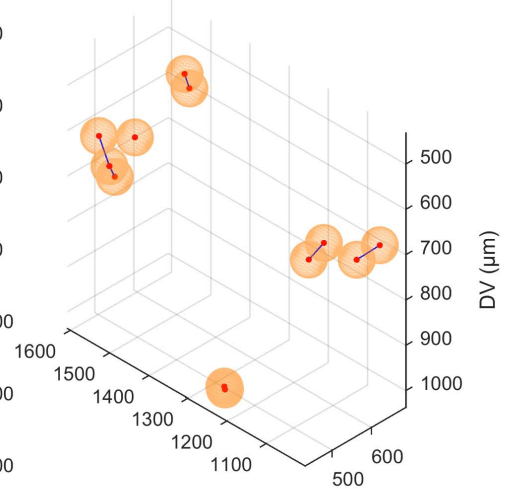

P7 Dataset #2

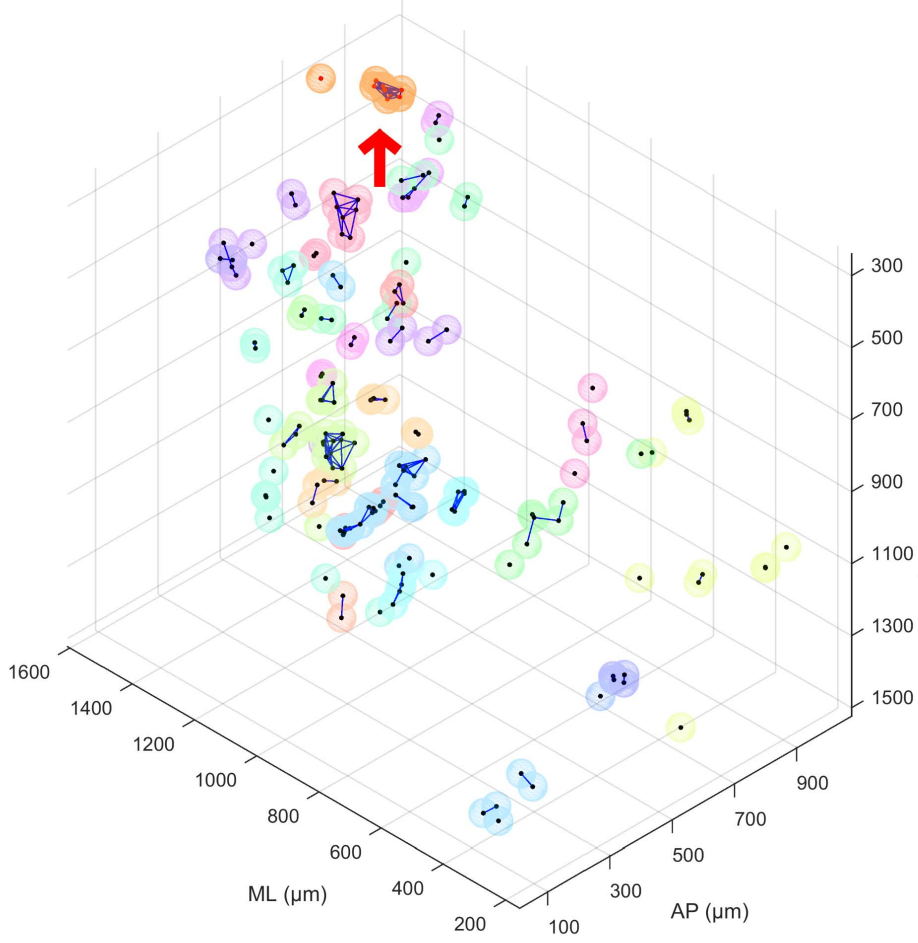

Clone #2

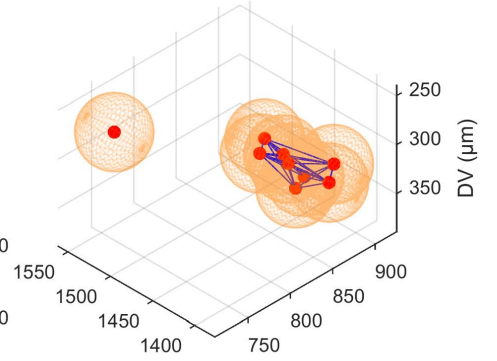

P7 Dataset #2

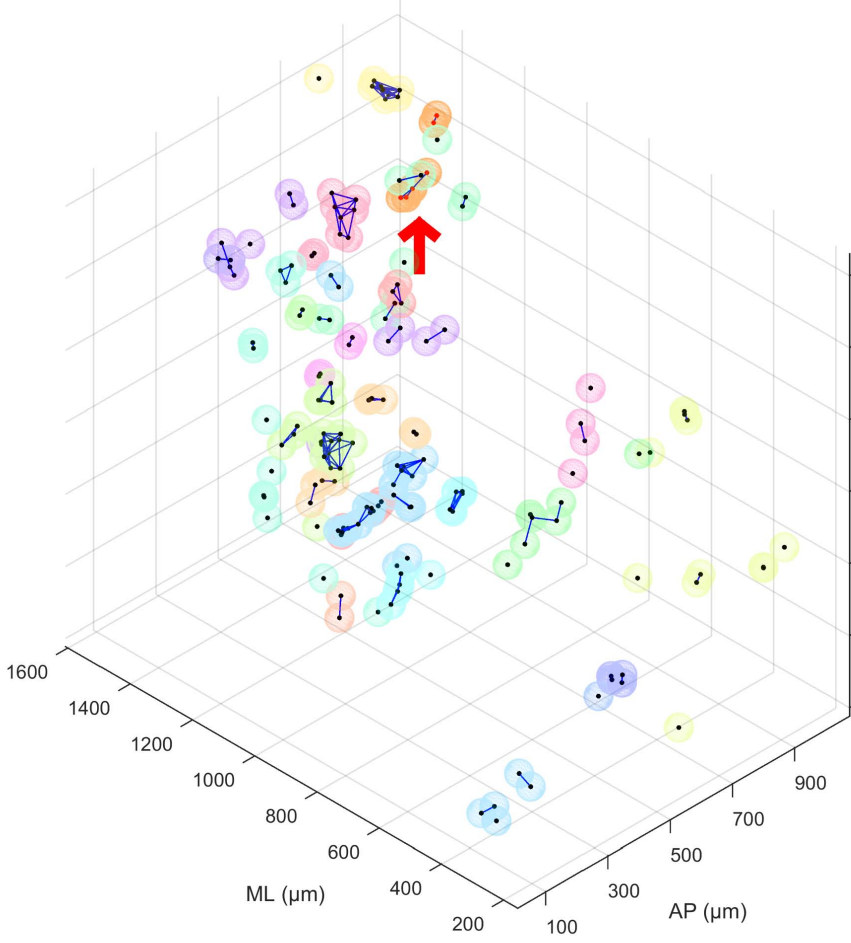

Clone #3

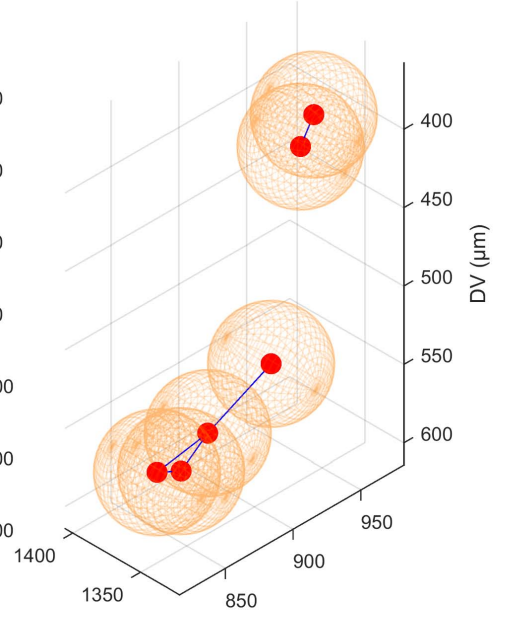



P7 Dataset #2

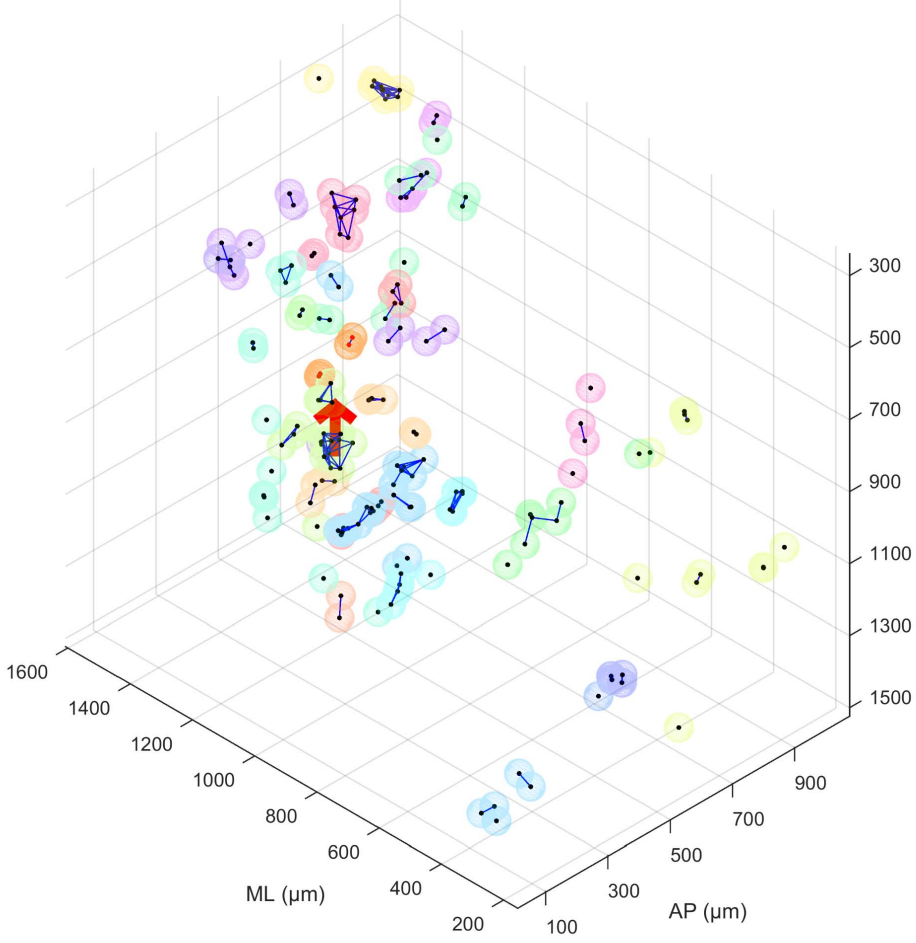

Clone #4

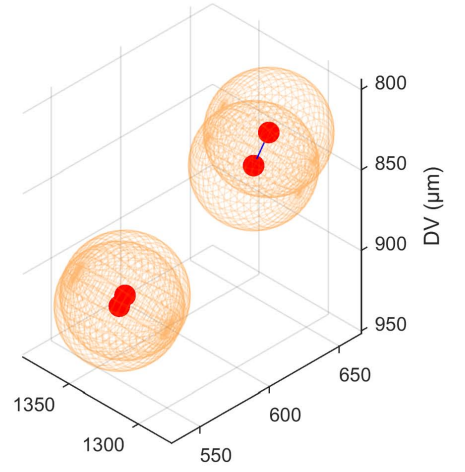

P7 Dataset #2

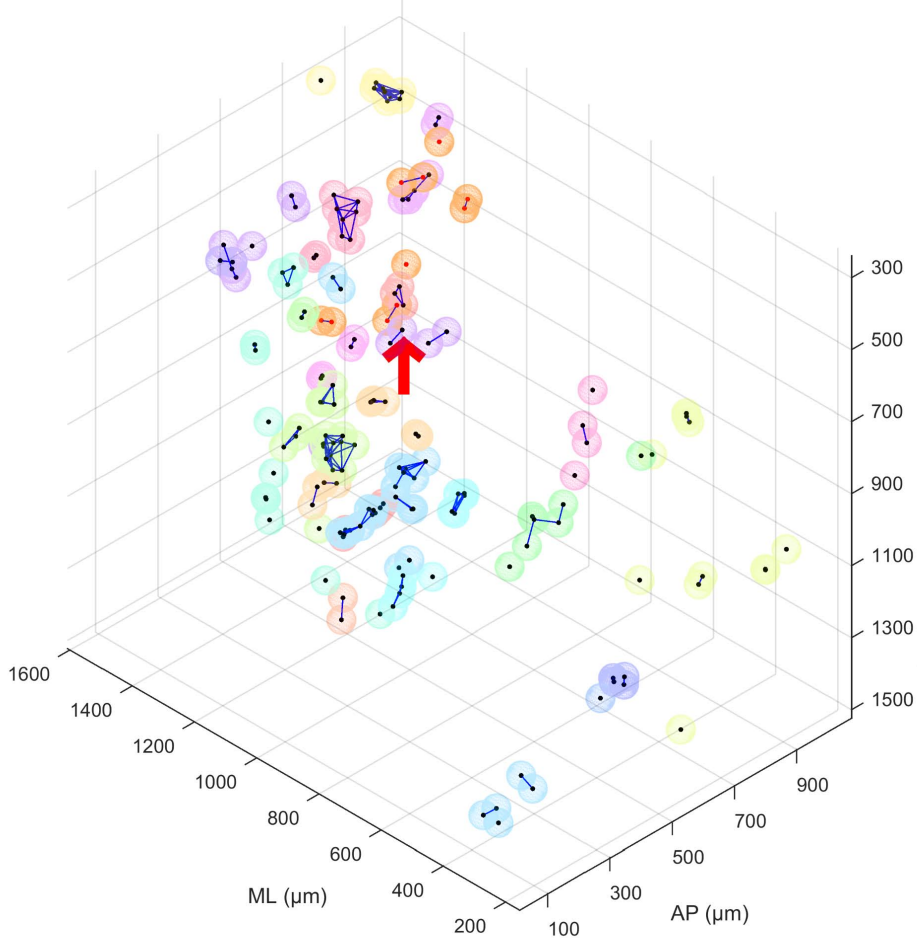

Clone #5

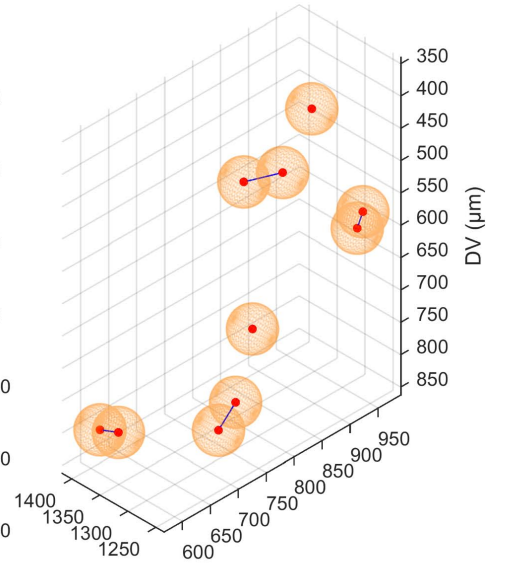

P7 Dataset #2

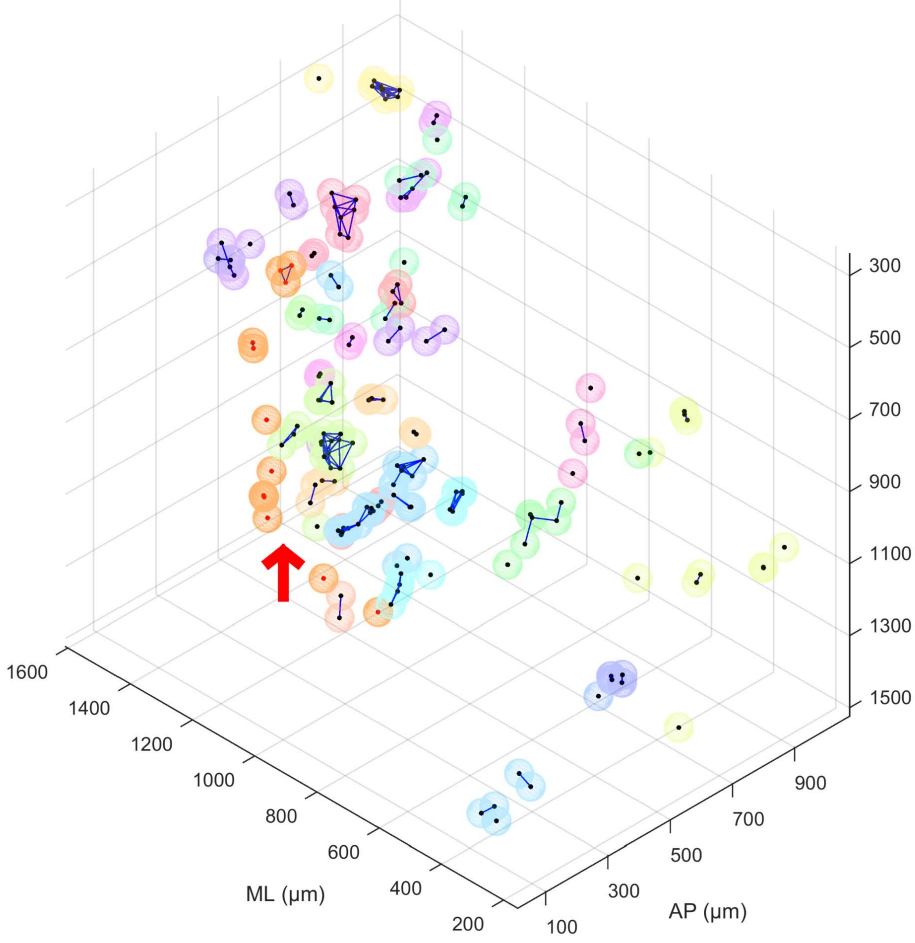

Clone #6

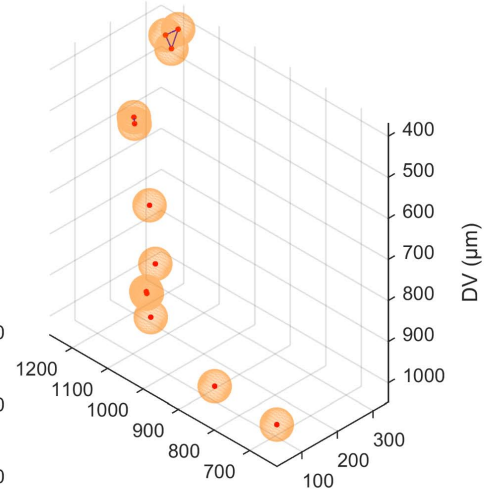

P7 Dataset #2

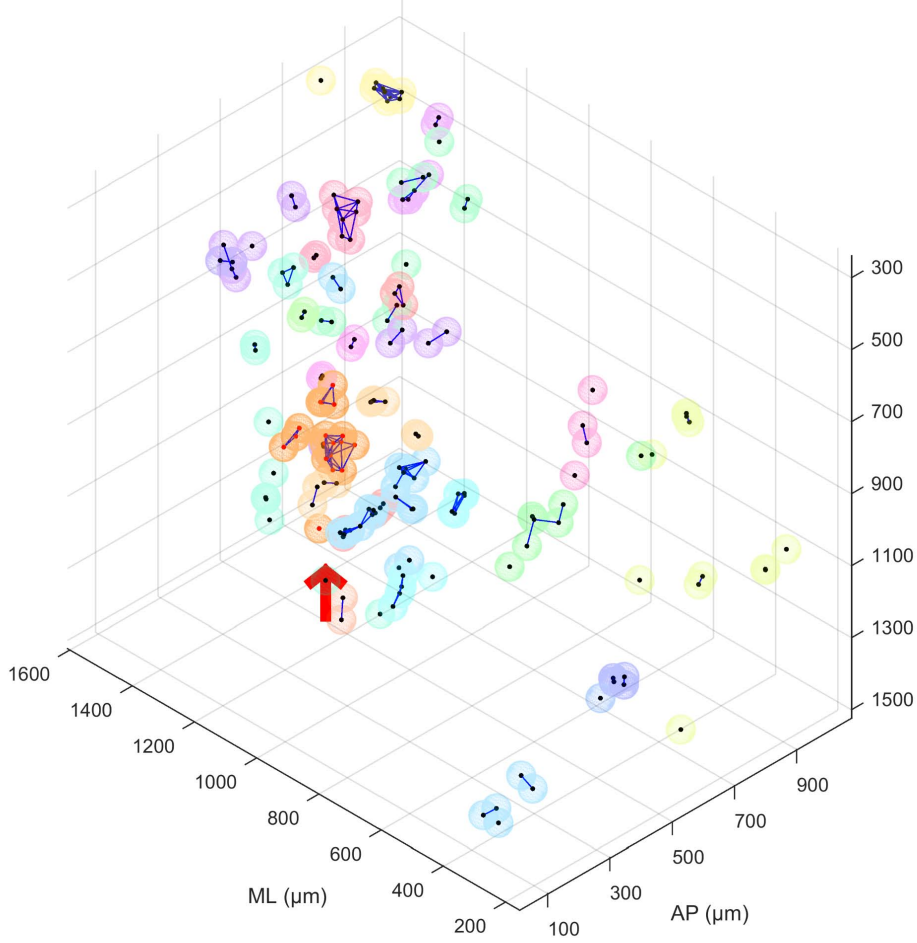

Clone #7

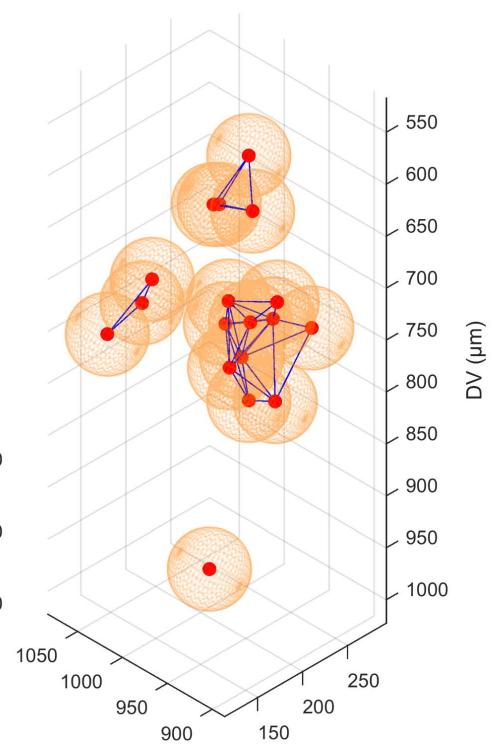

P7 Dataset #2

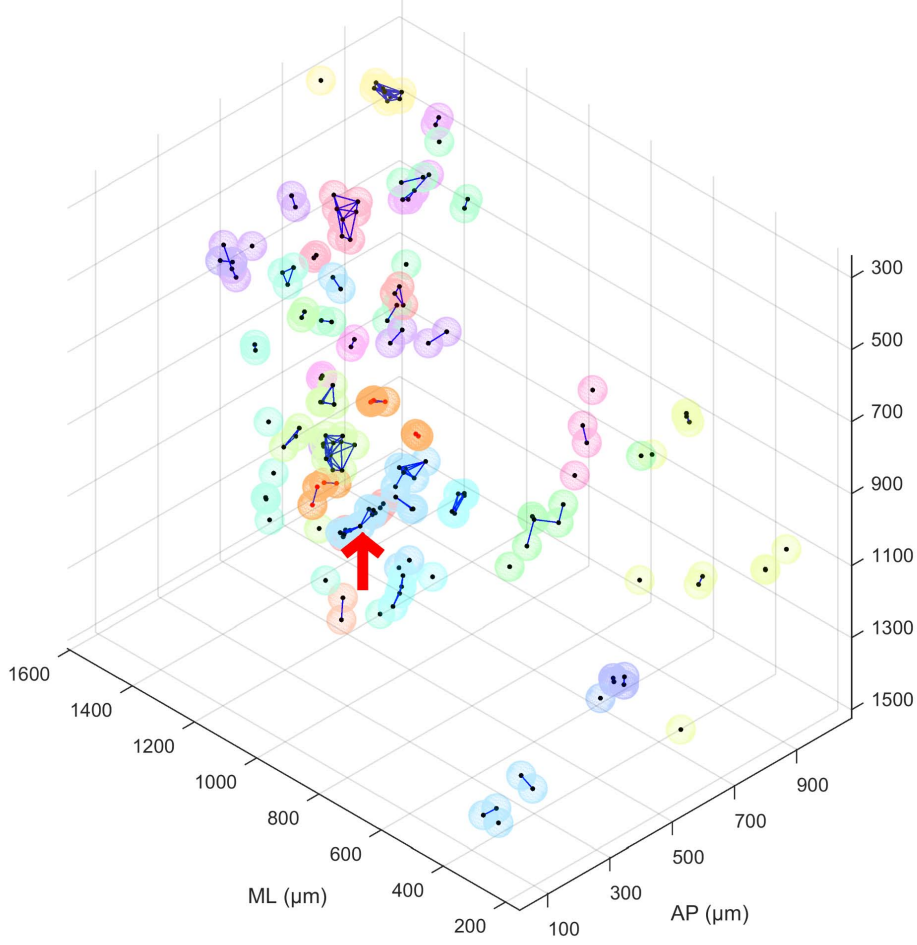

Clone #8

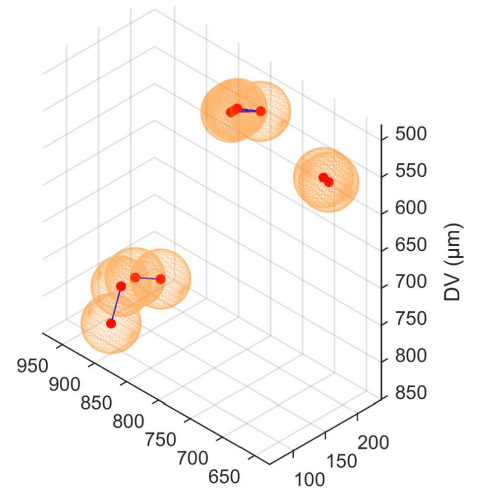

P7 Dataset #2

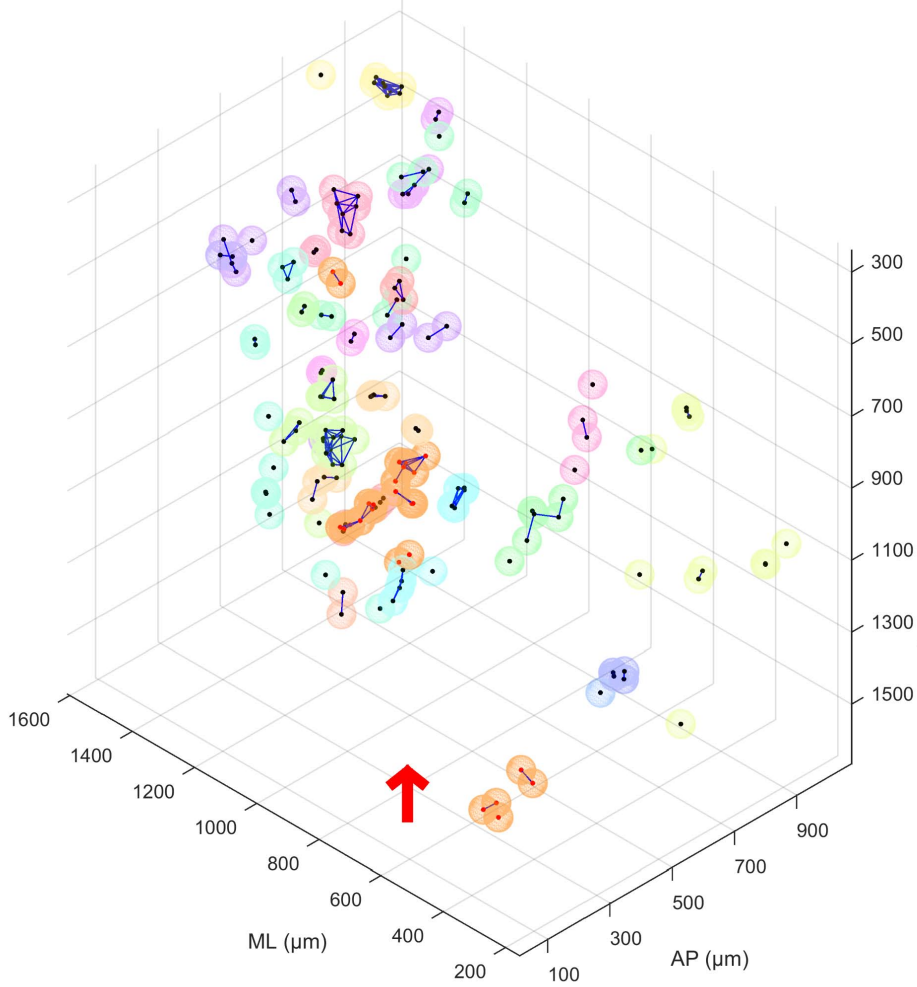

Clone #9

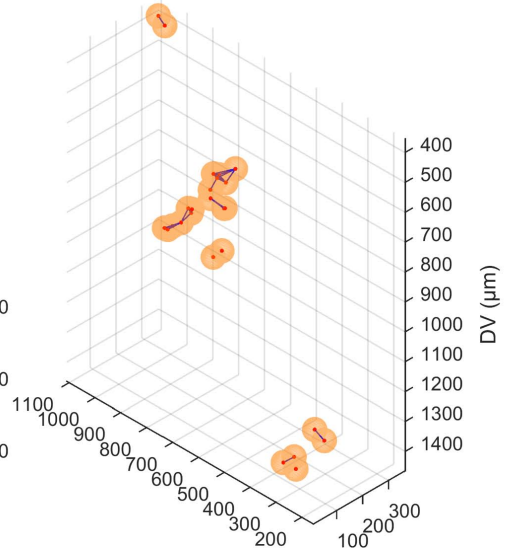

**P7 Dataset #2**

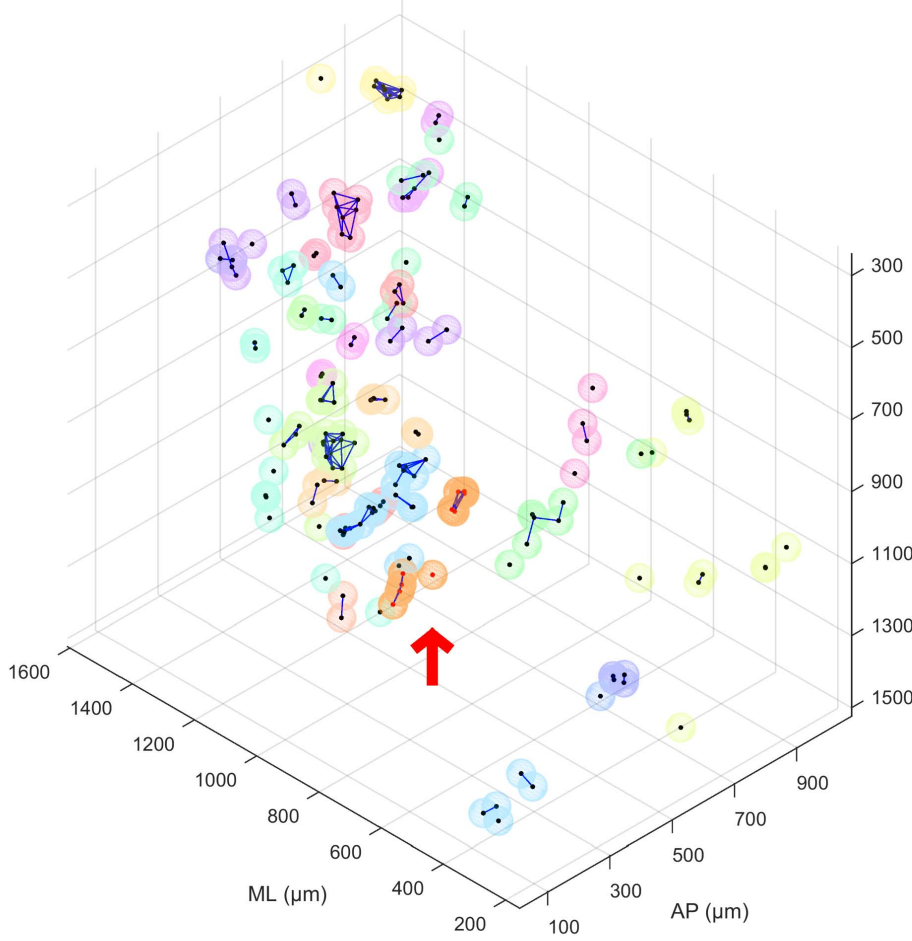

**Clone #10**

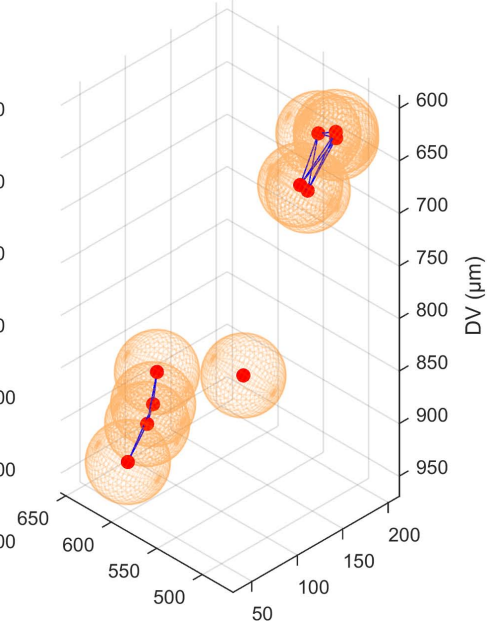

P7 Dataset #2

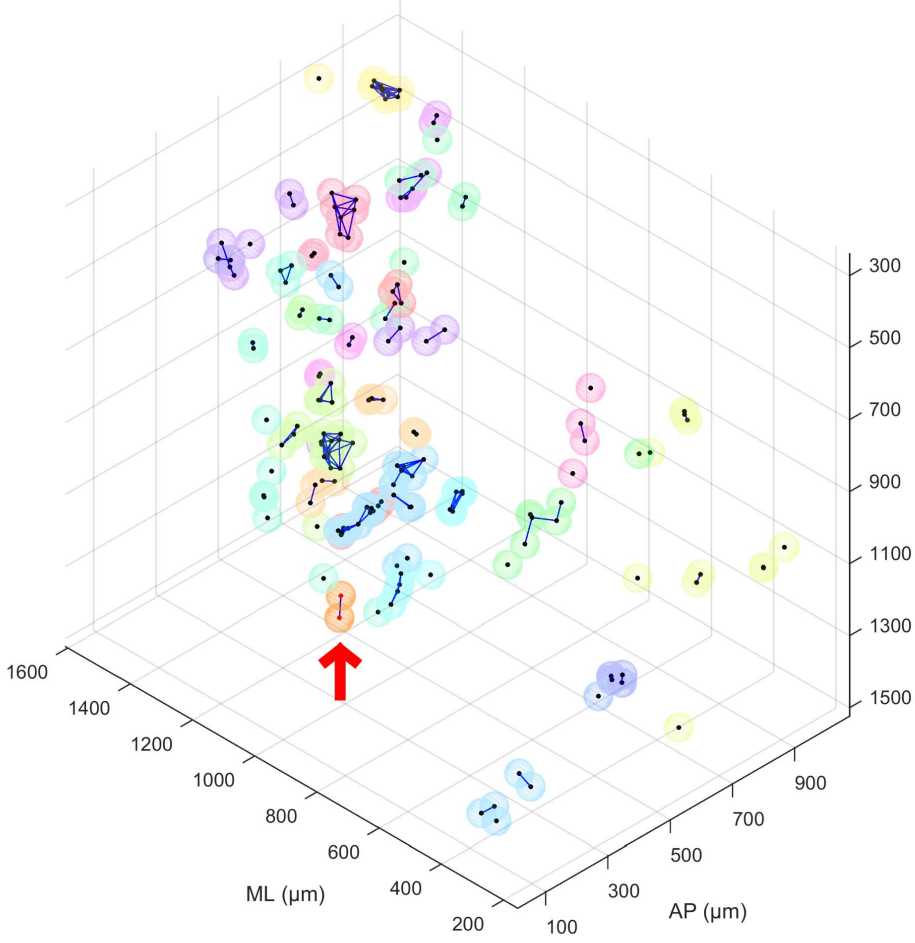

Clone #11

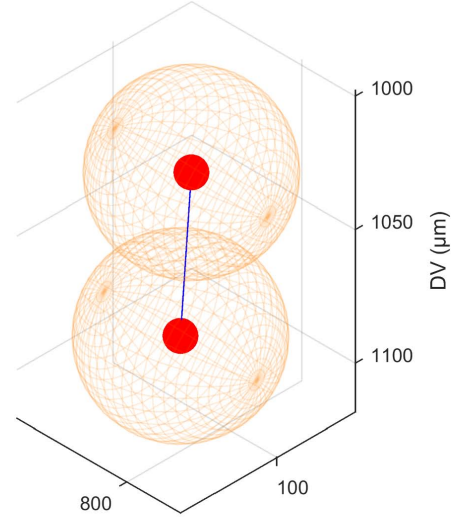



**P7 Dataset #2**

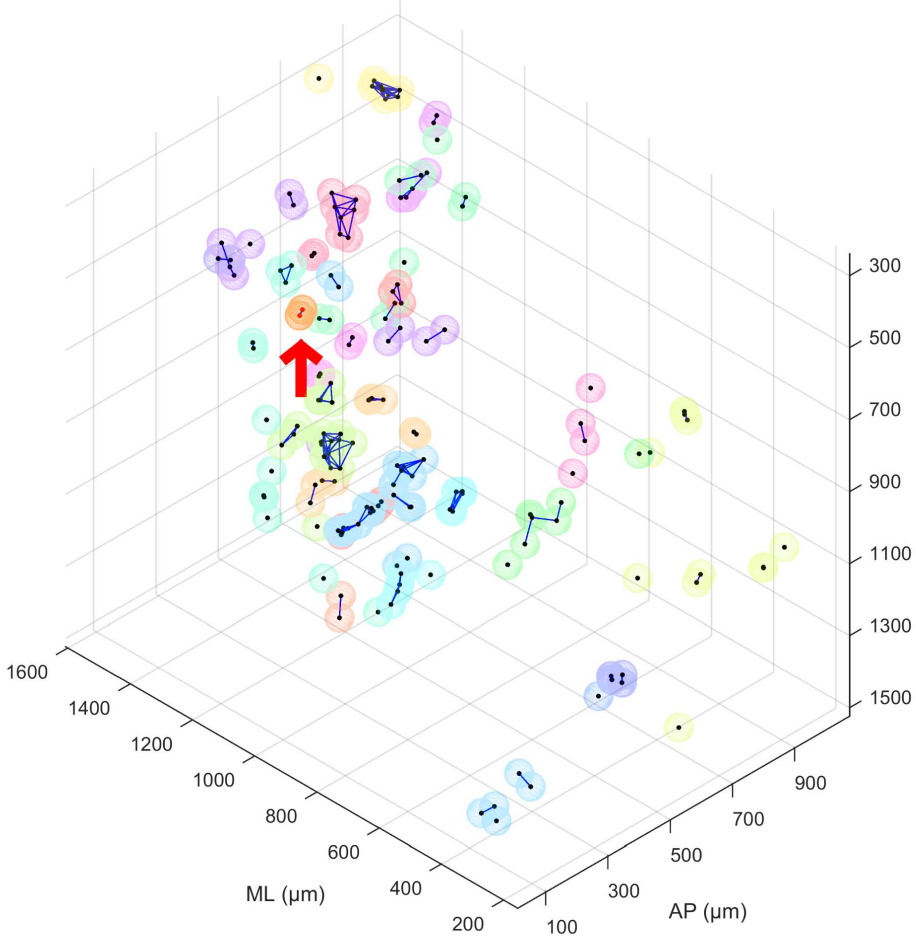

**Clone #12**

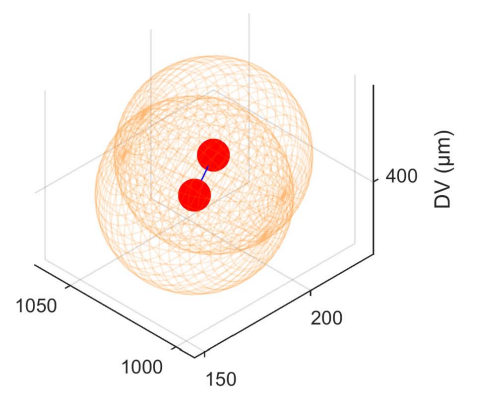

P7 Dataset #2

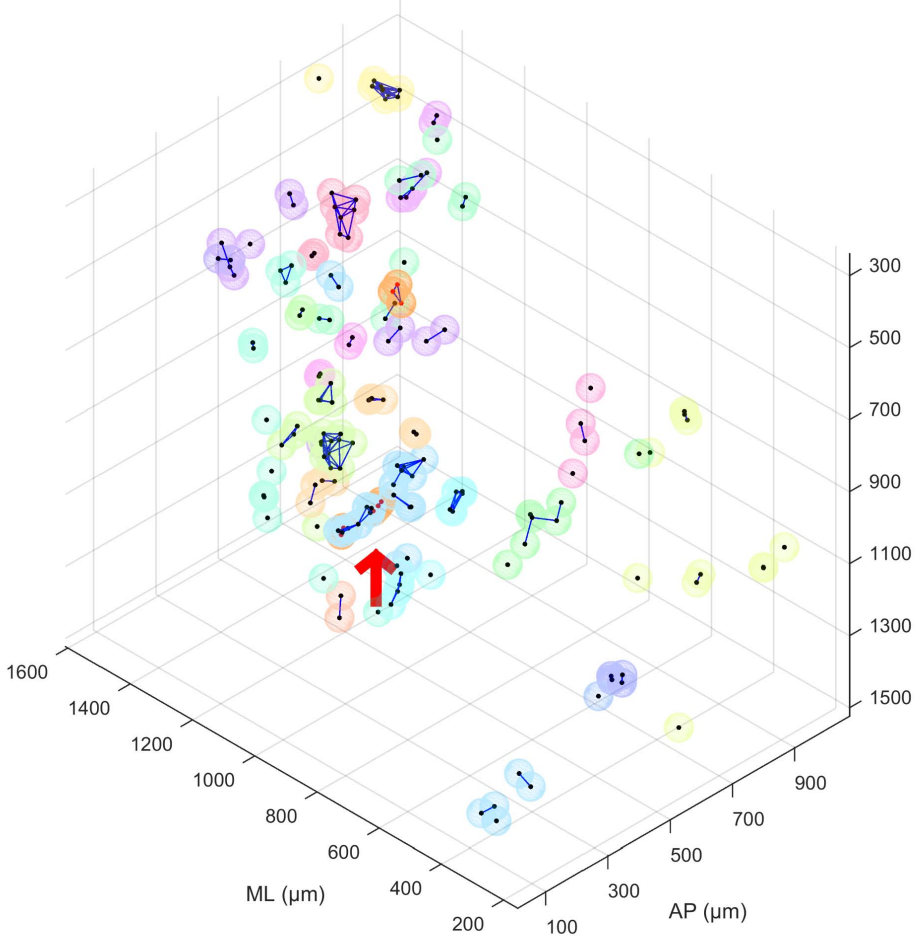

Clone #13

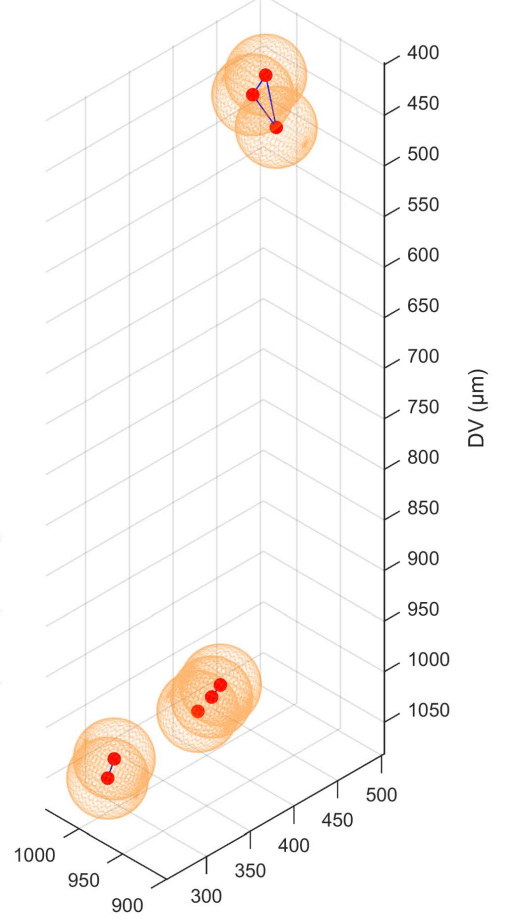

P7 Dataset #2

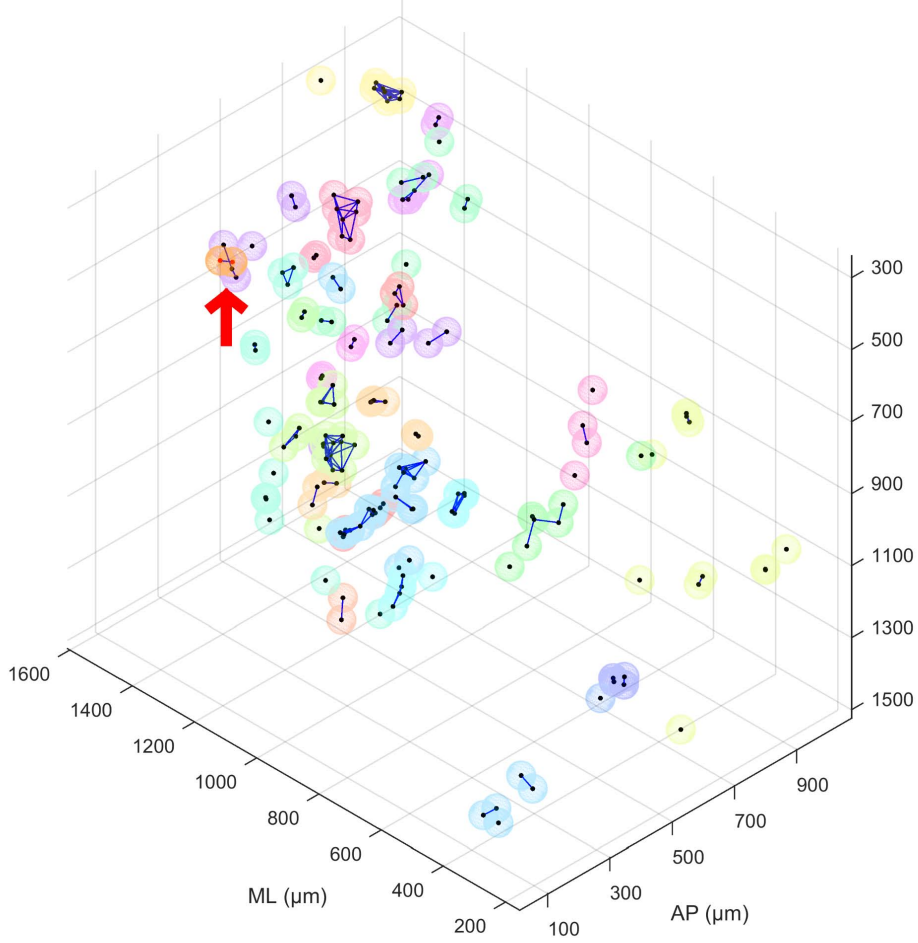

Clone #14

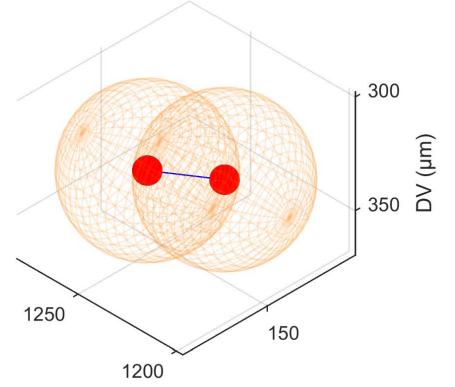

P7 Dataset #2

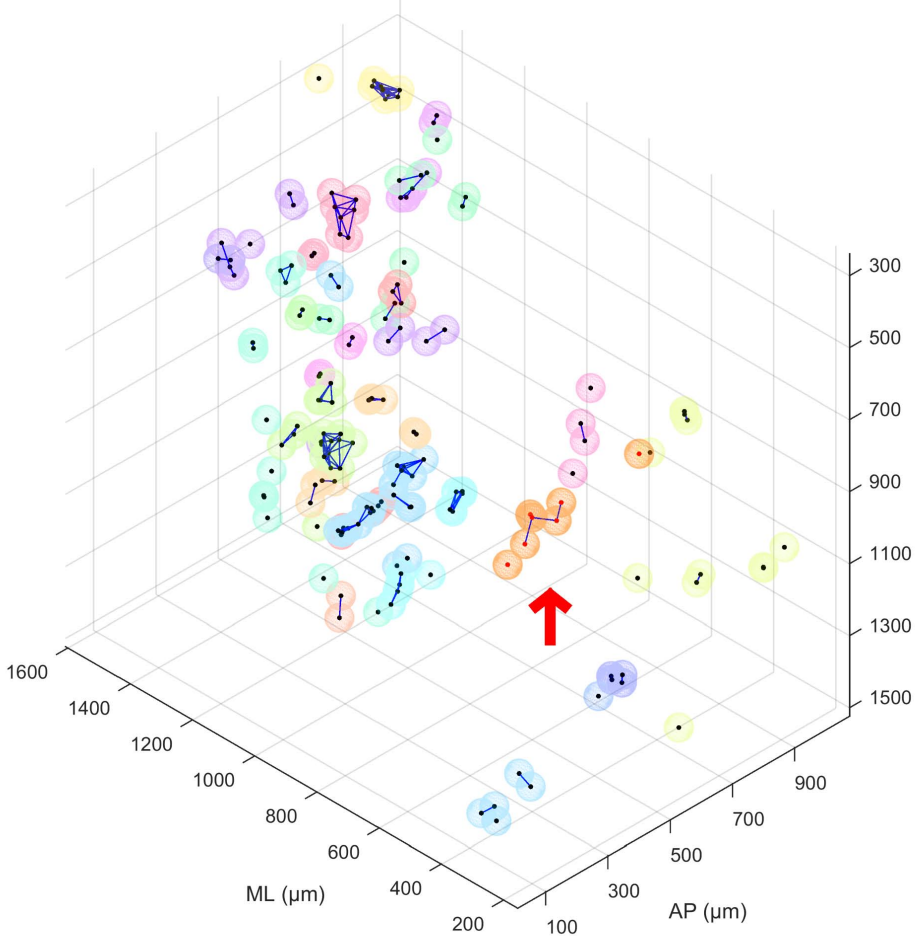

Clone #16

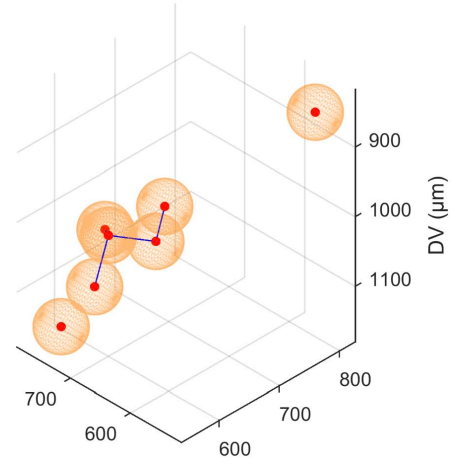

**P7 Dataset #2**

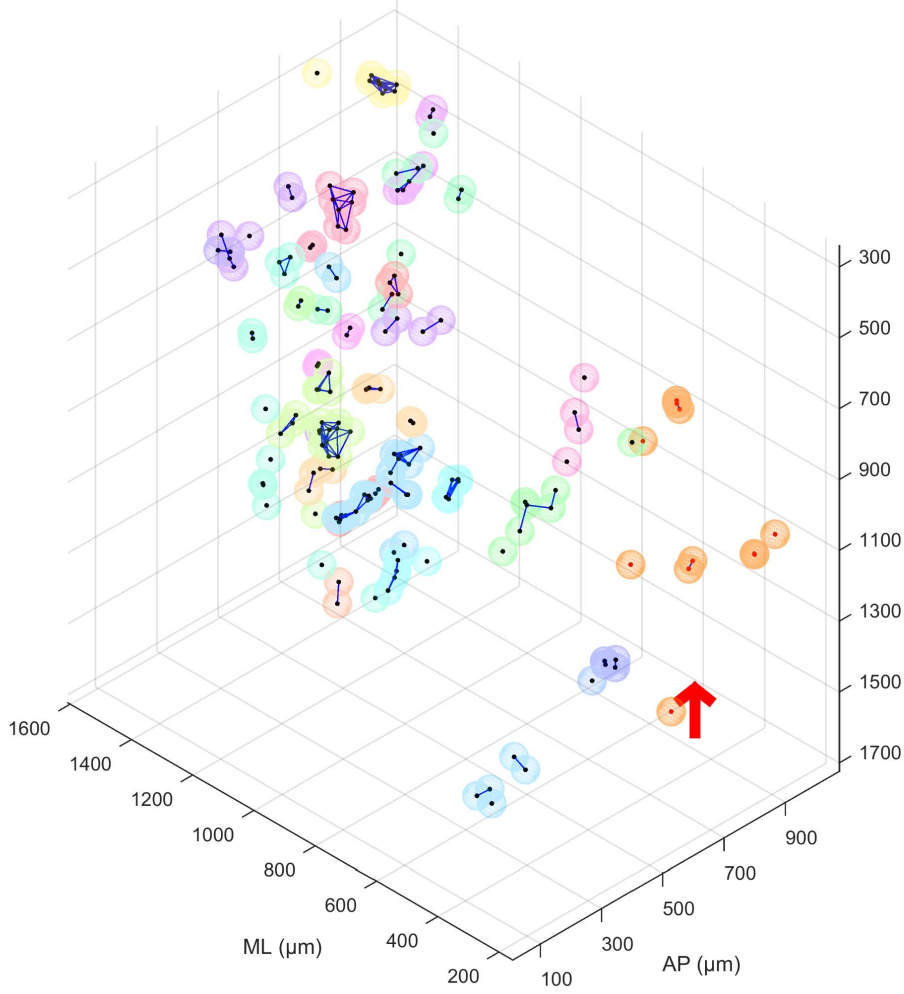

**Clone #17**

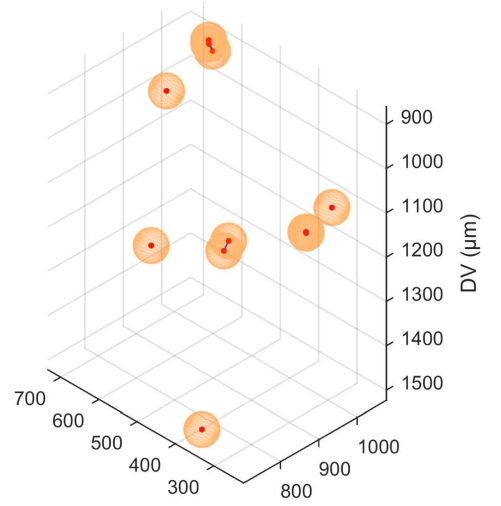

P7 Dataset #2

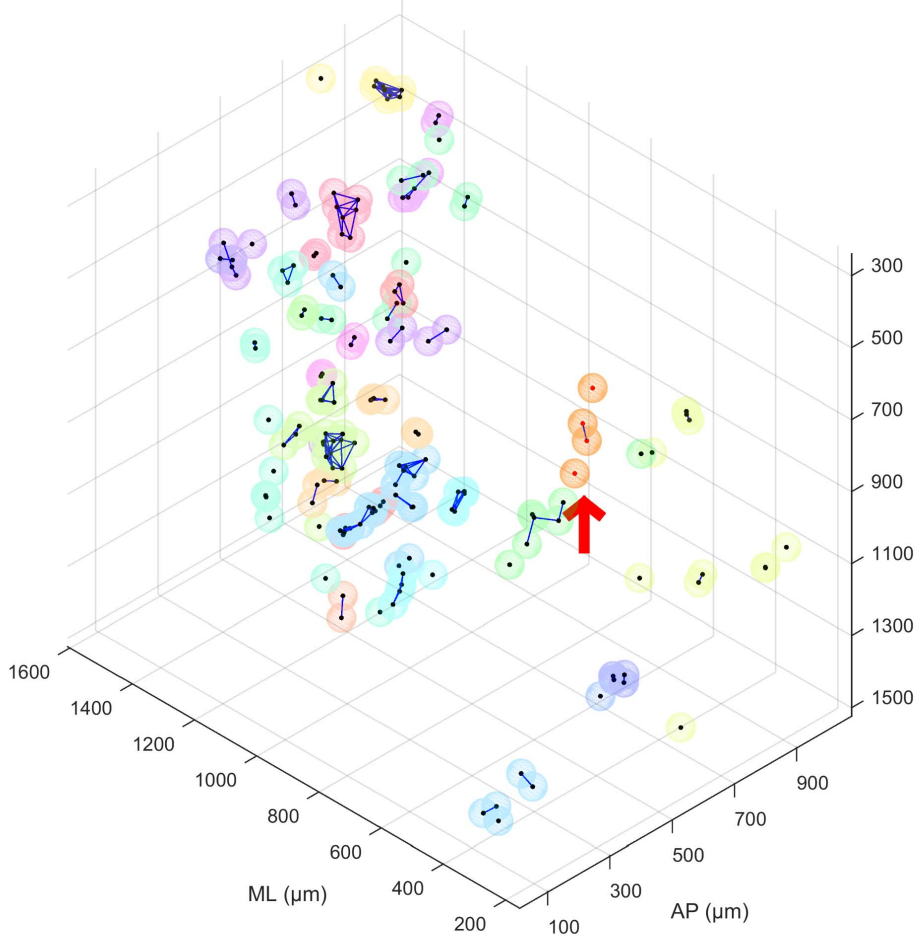

Clone #18

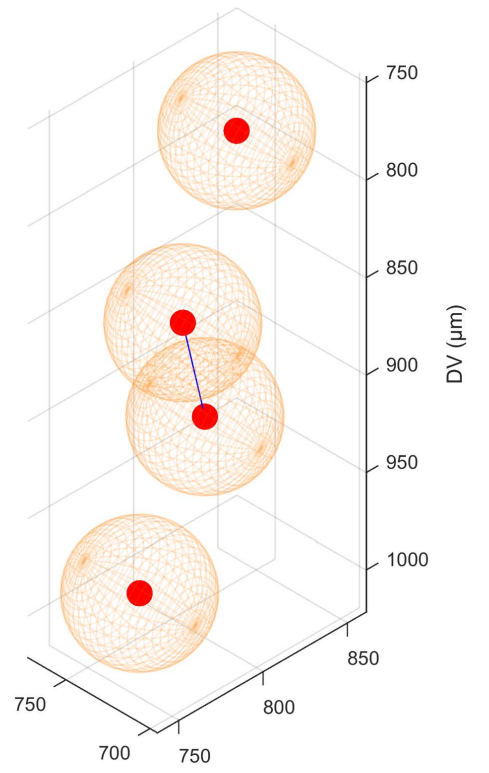

**P7 Dataset #2**

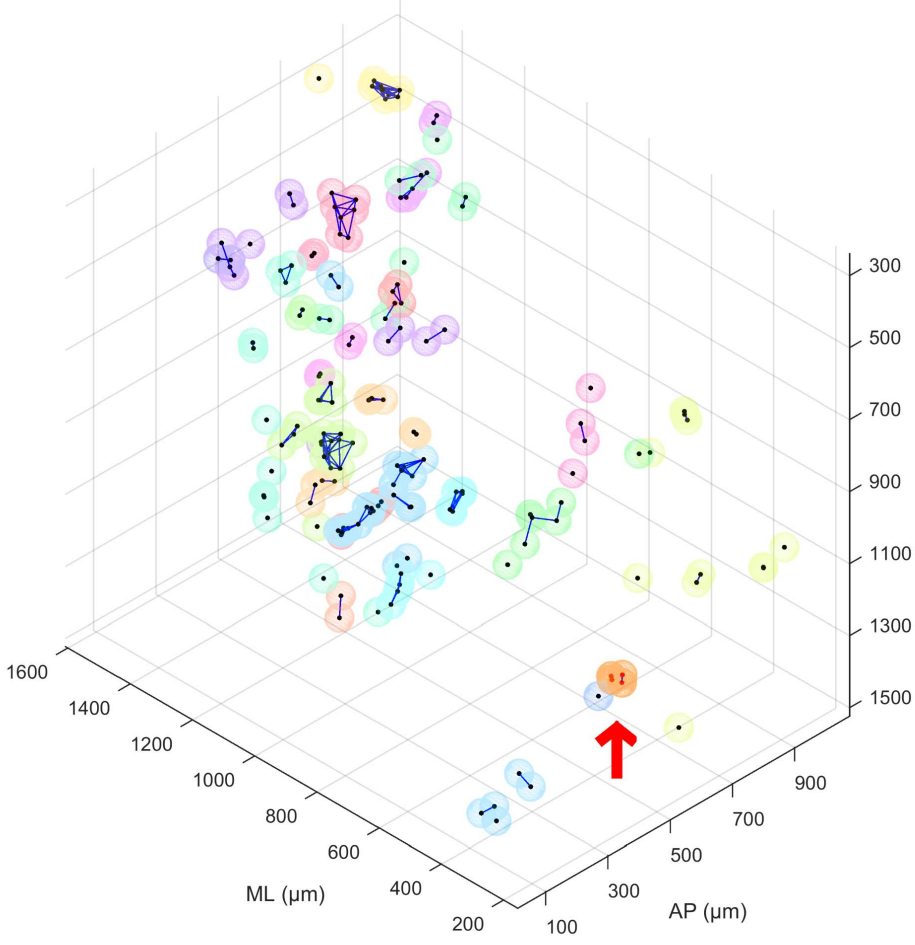

**Clone #19**

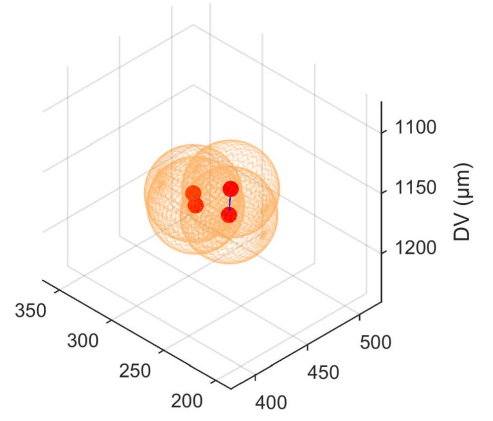

P7 Dataset #2

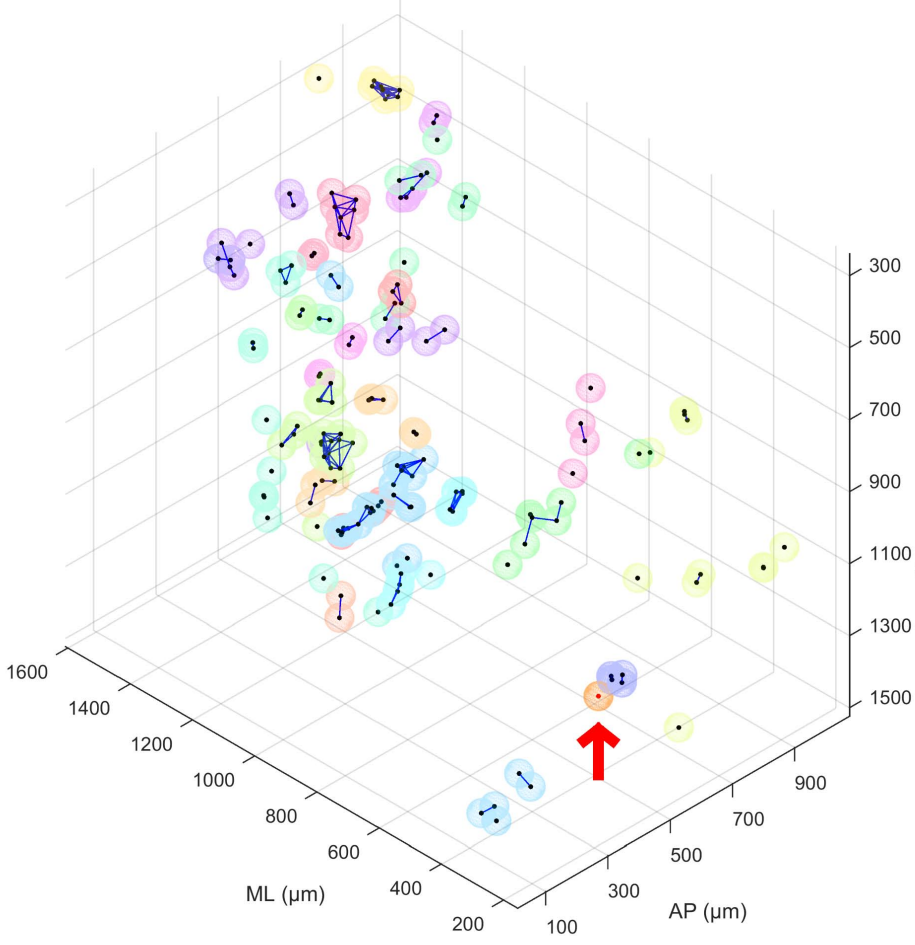

Clone #20

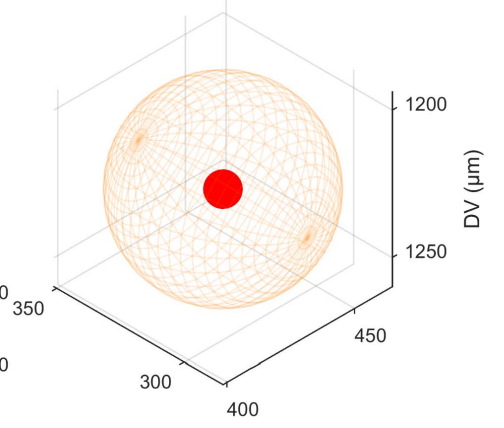



P7 Dataset #2

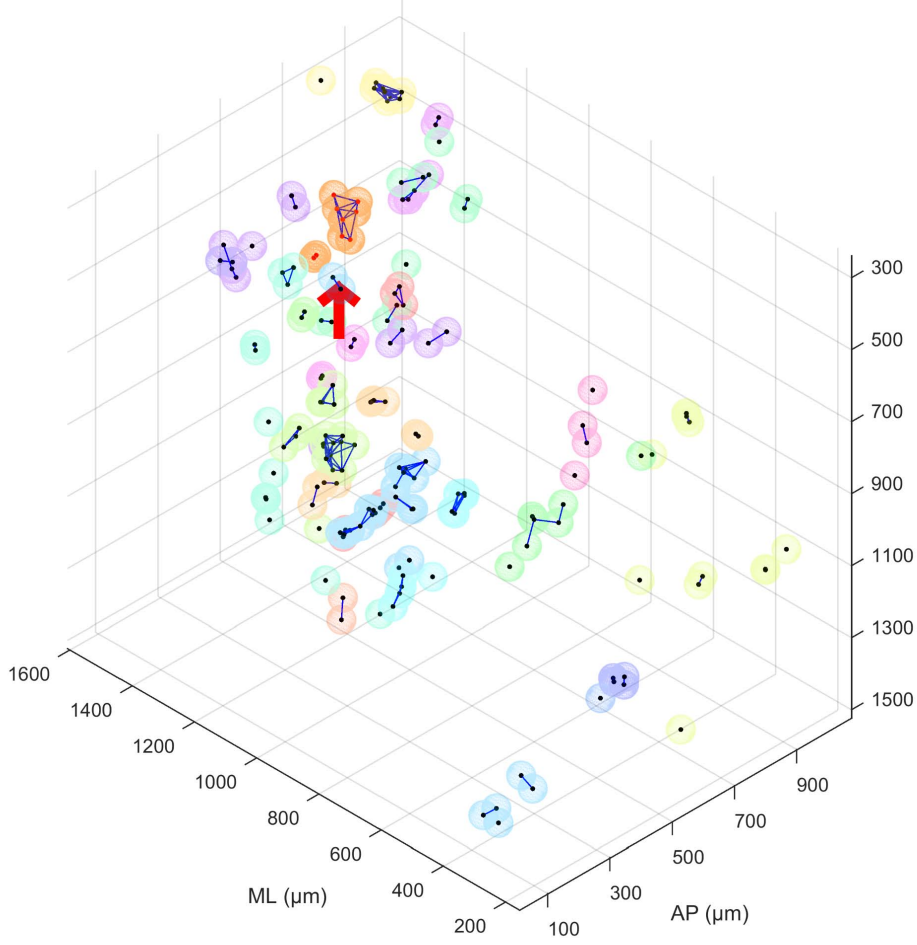

Clone #21

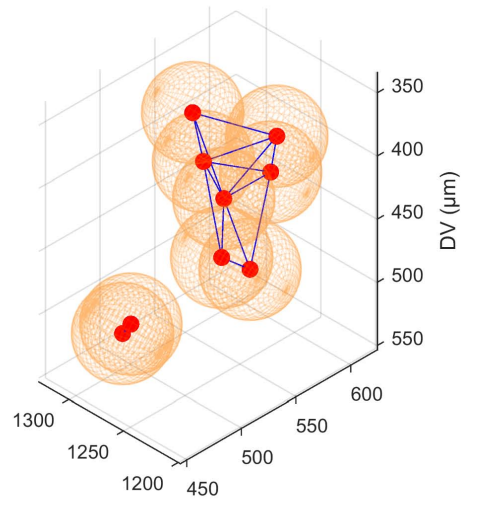

# **P21 Clones**

**P21 Dataset #1**

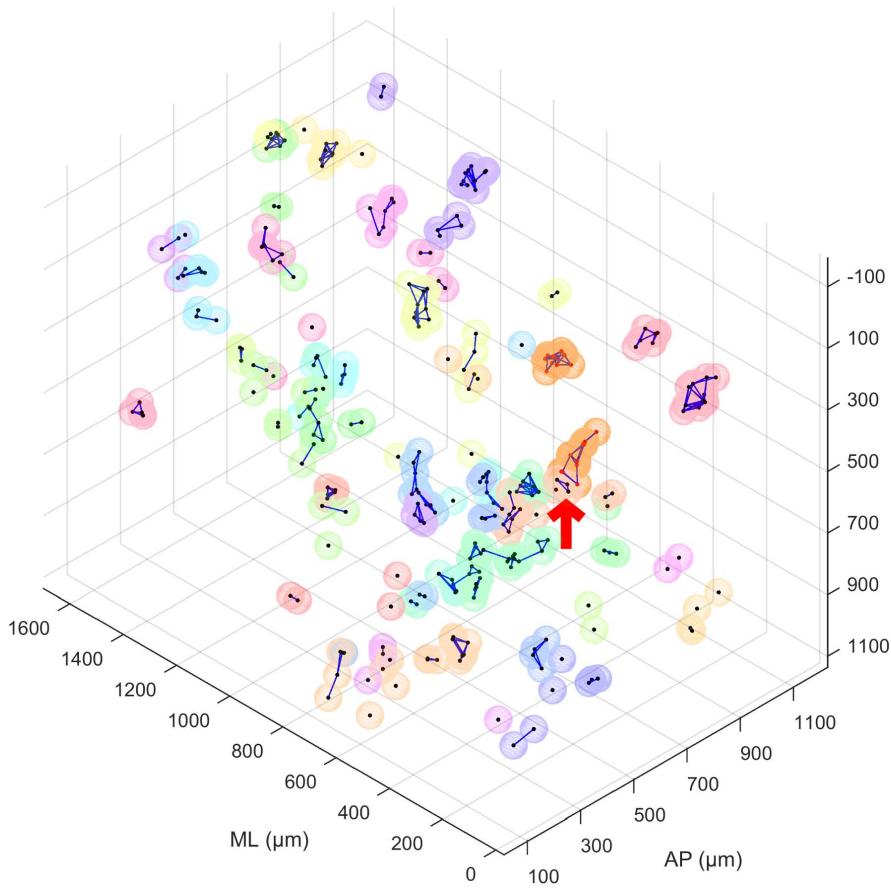

**Clone #1**

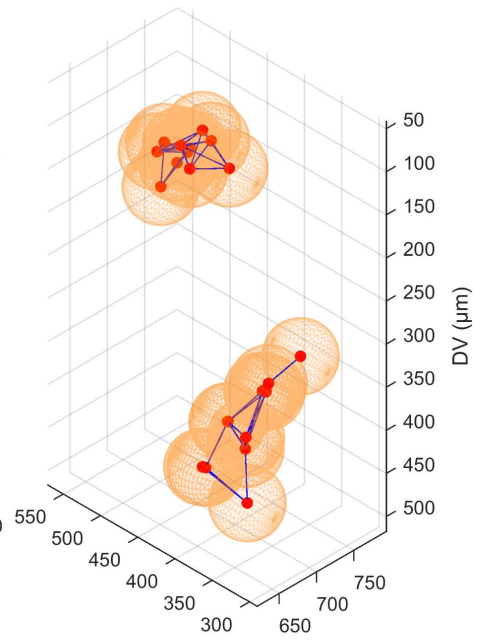

**P21 Dataset #1**

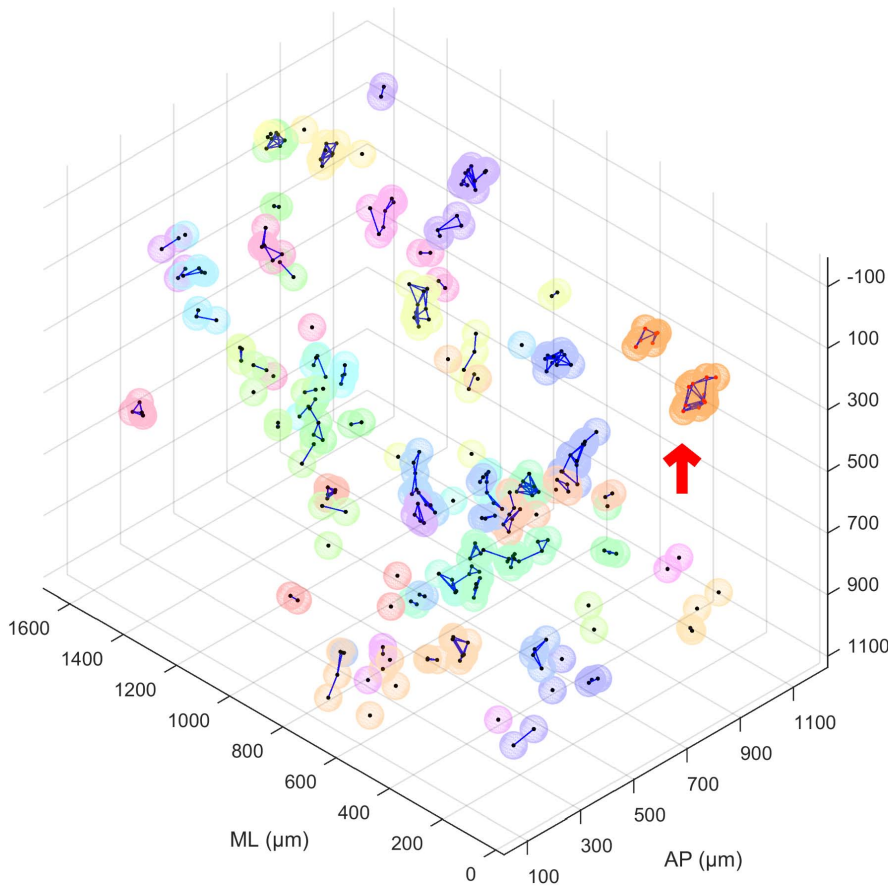

**Clone #2**

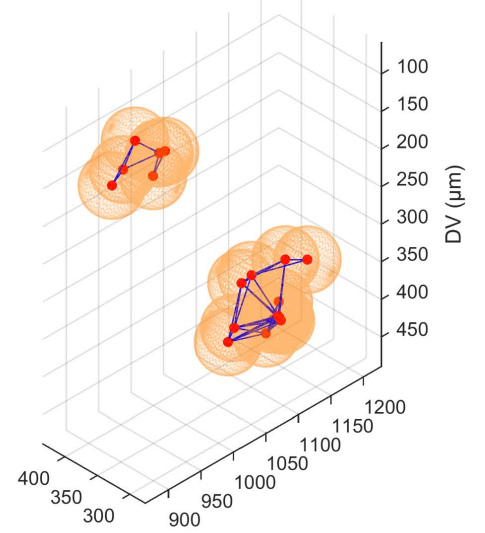

P21 Dataset #1

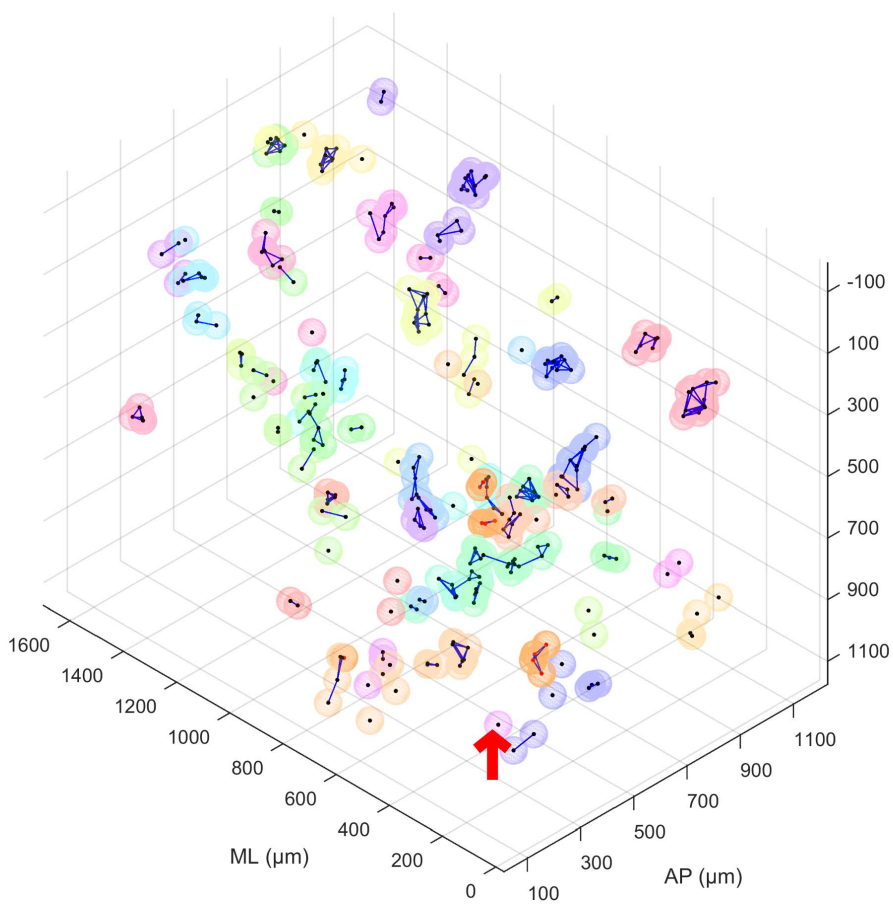

Clone #3

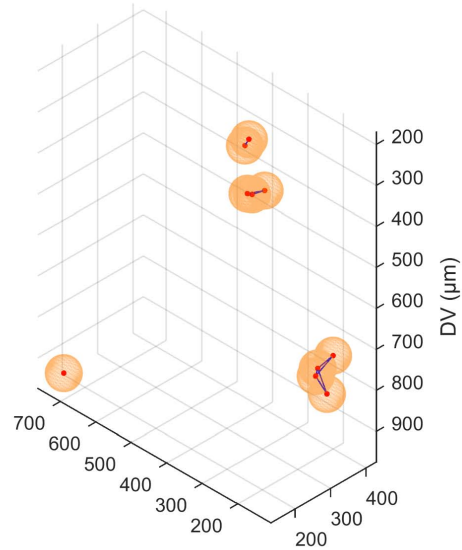

**P21 Dataset #1**

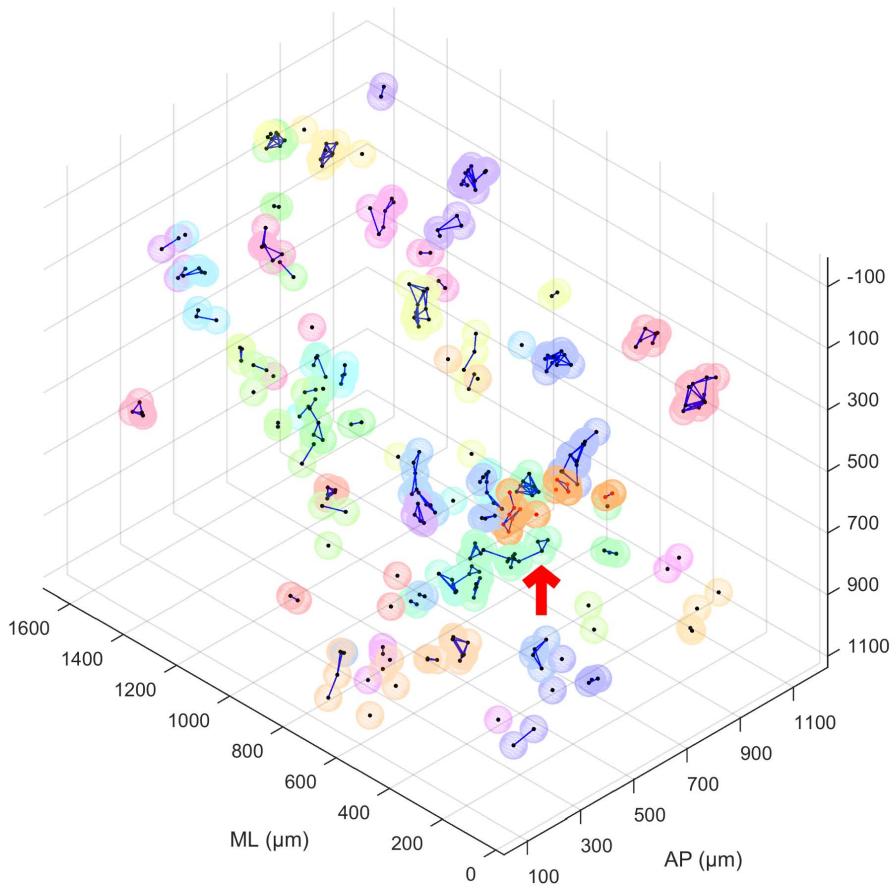

**Clone #4**

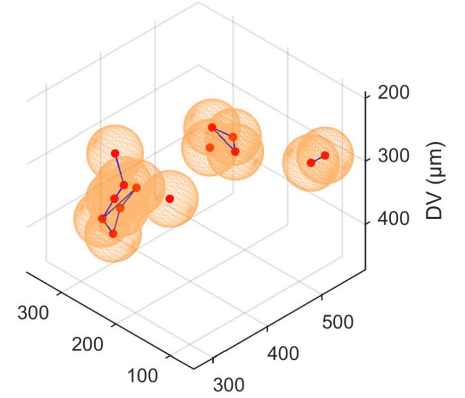

P21 Dataset #1

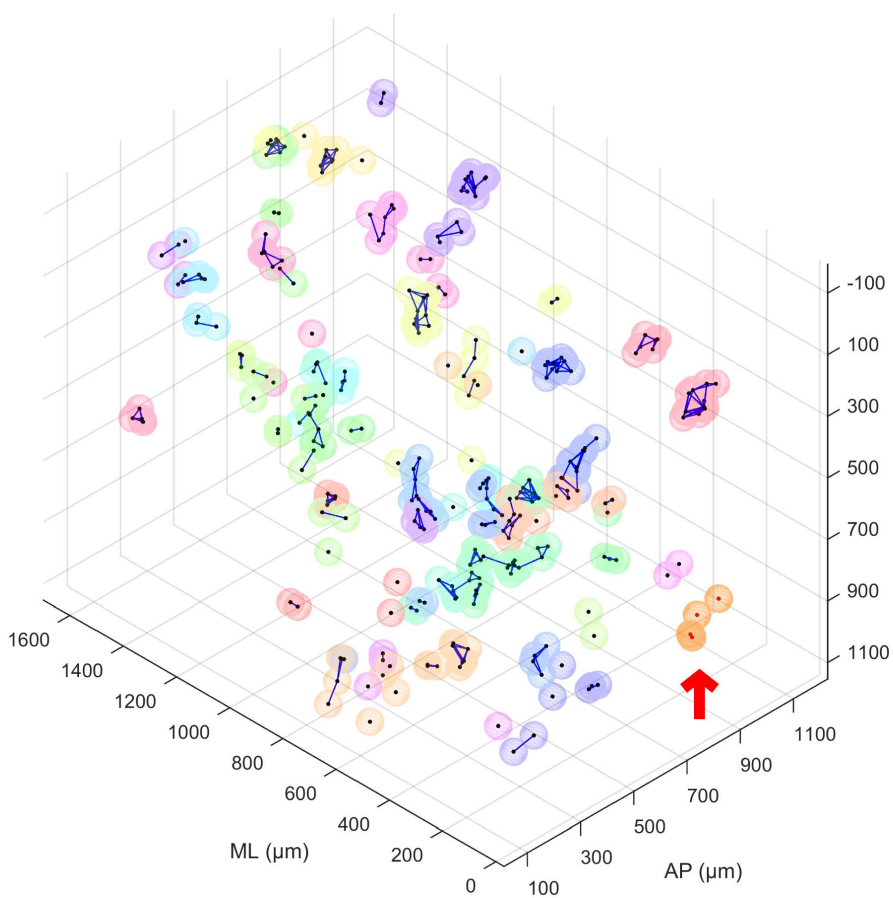

Clone #5

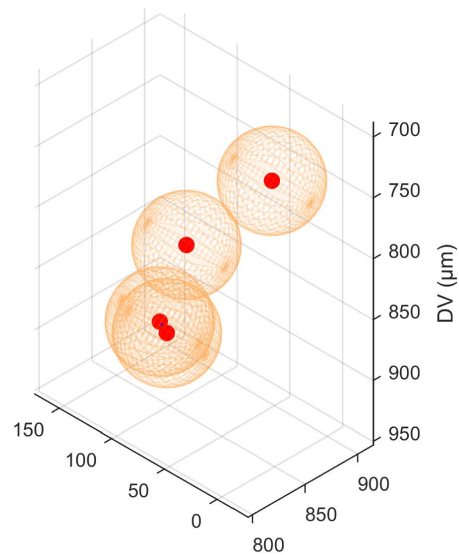

**P21 Dataset #1**

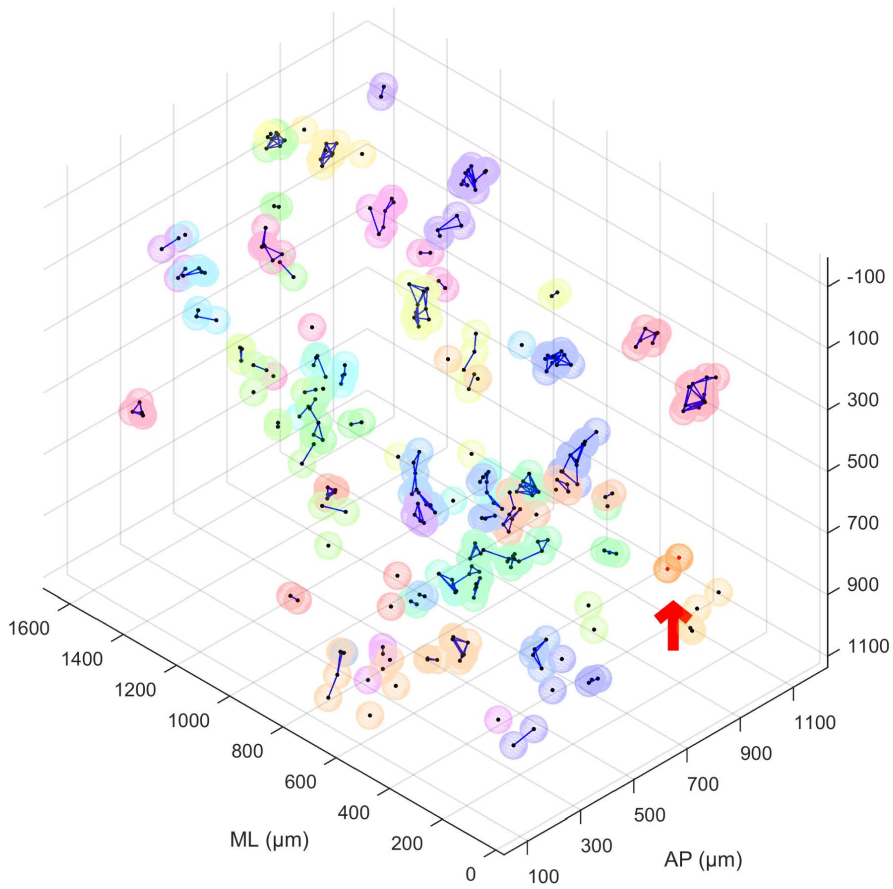

**Clone #6**

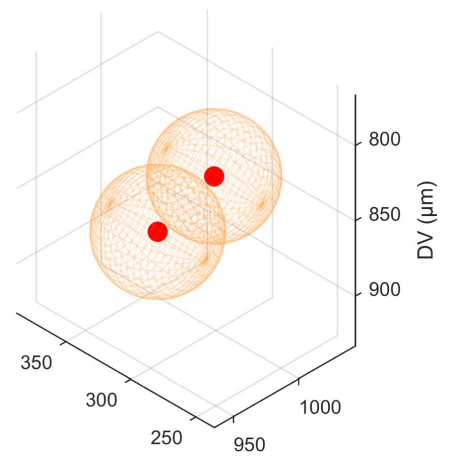



P21 Dataset #1

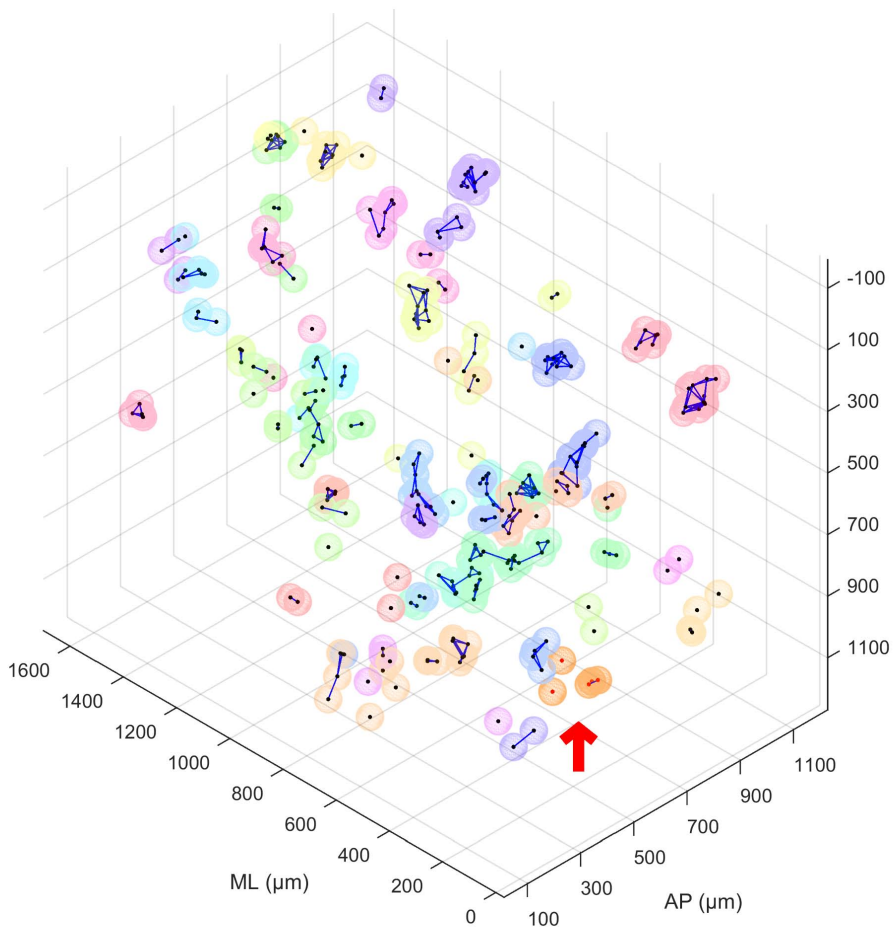

Clone #7

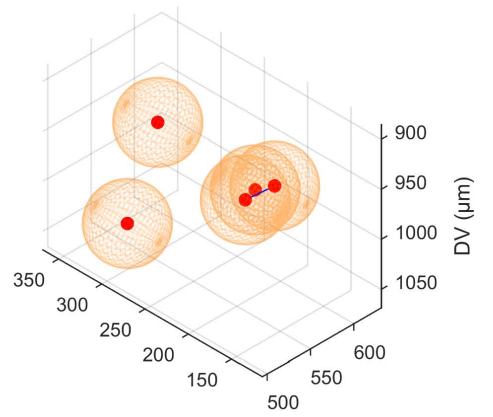

P21 Dataset #1

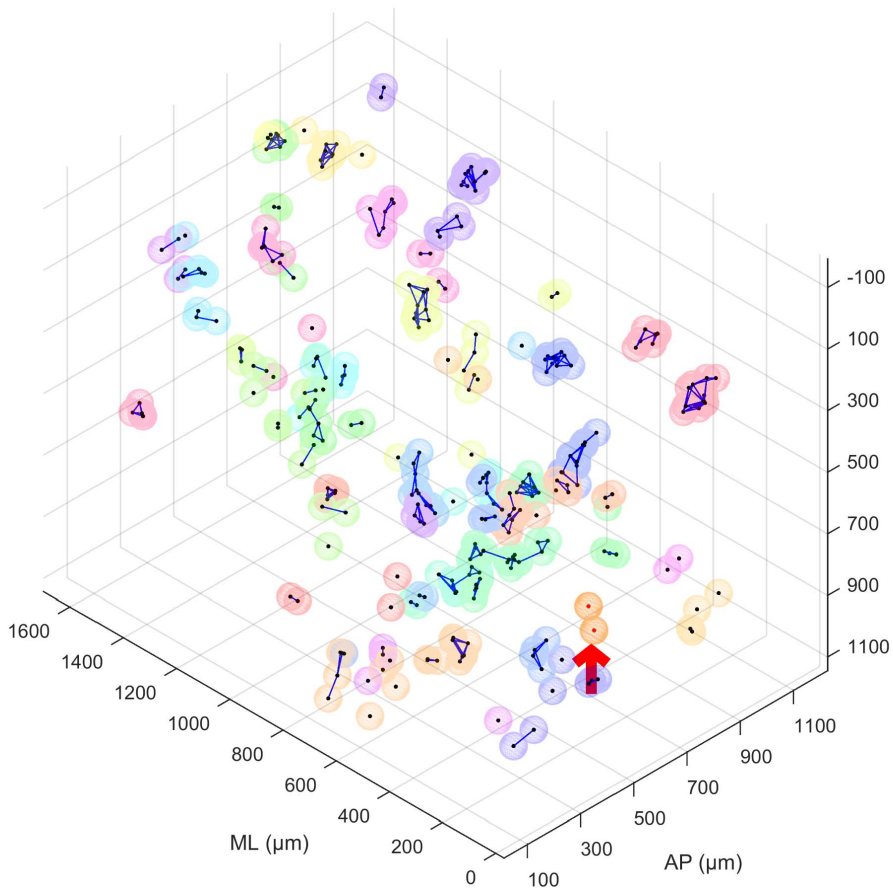

Clone #8

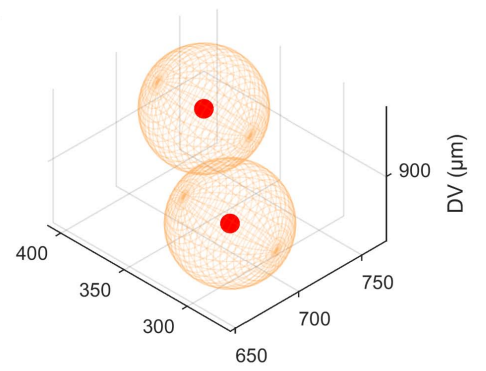

**P21 Dataset #1**

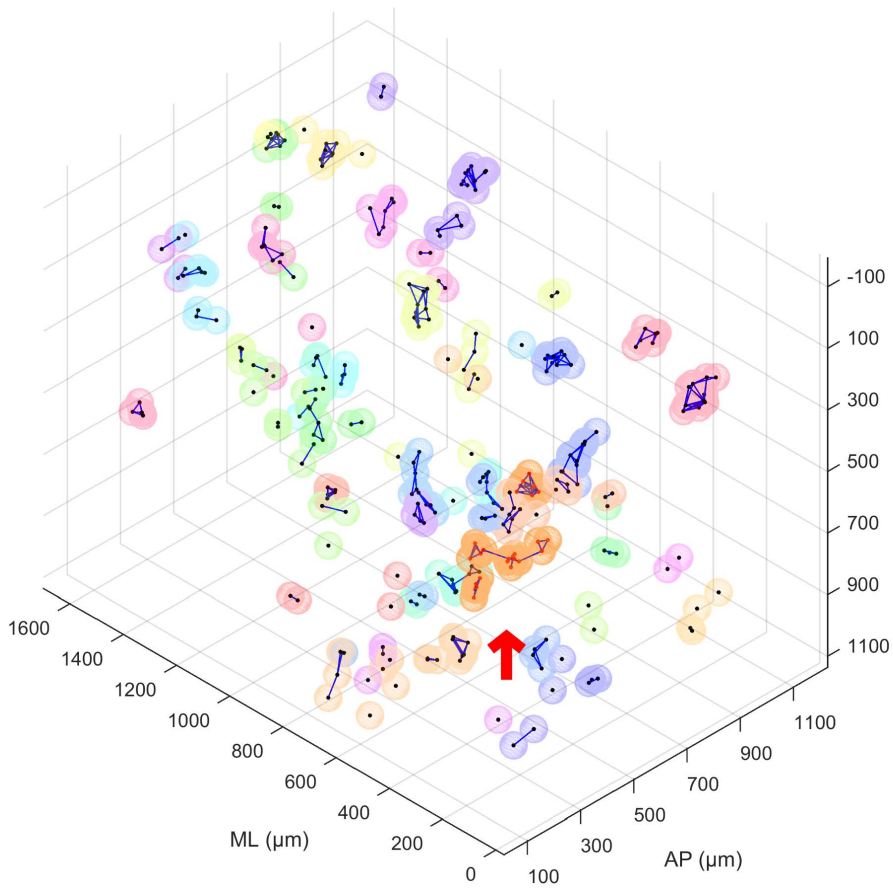

**Clone #9**

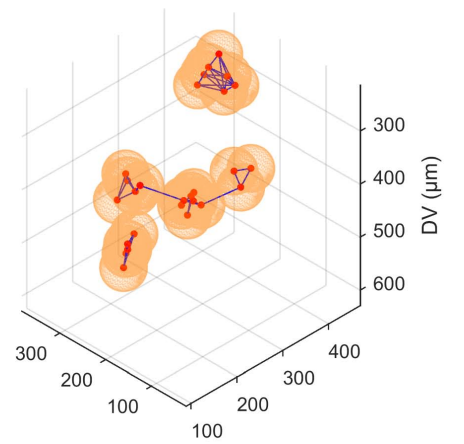

**P21 Dataset #1**

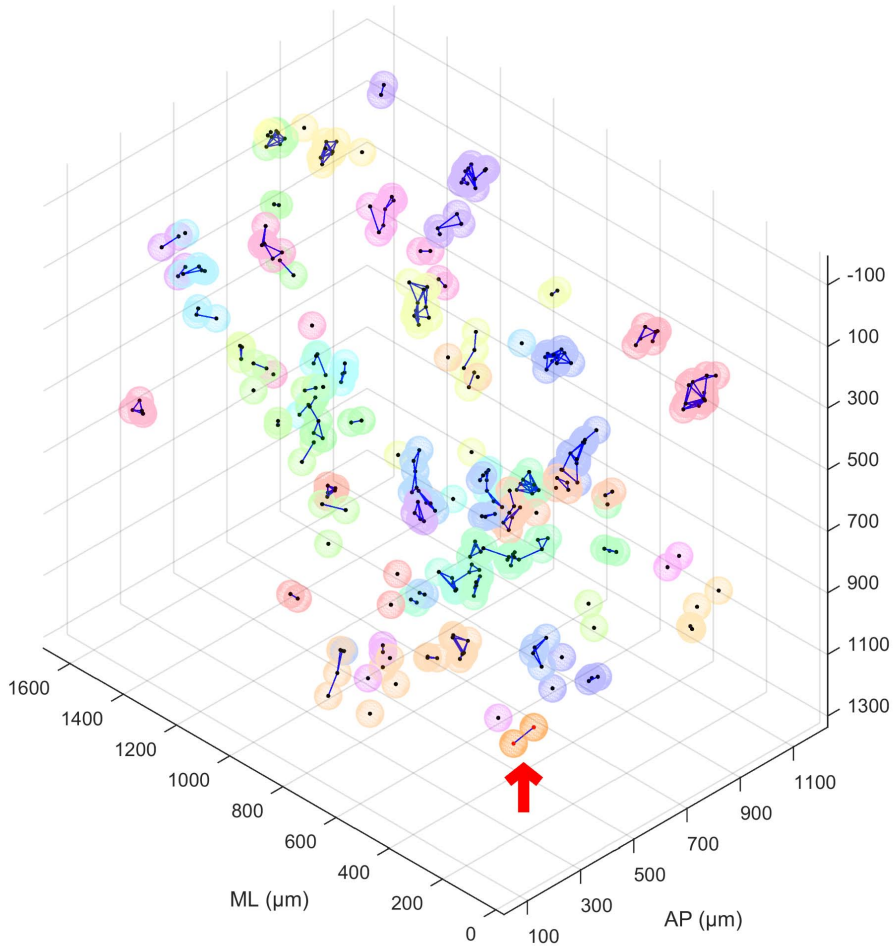

**Clone #10**

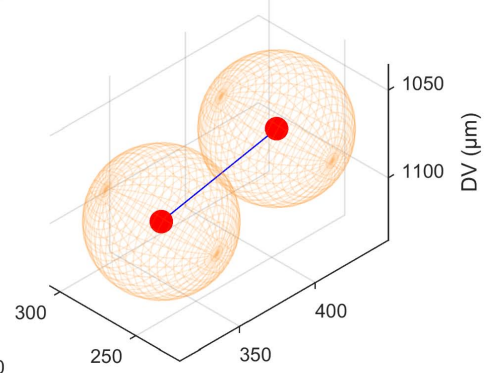

**P21 Dataset #1**

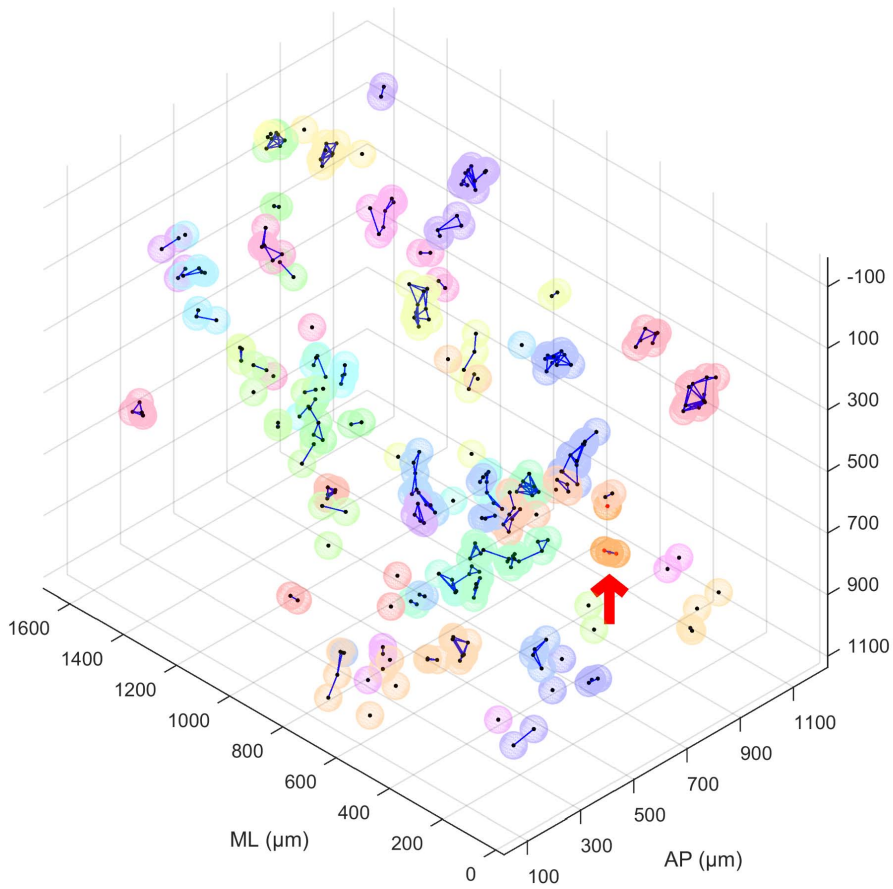

**Clone #11**

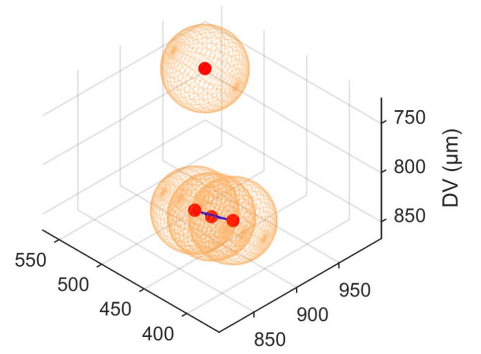

P21 Dataset #1

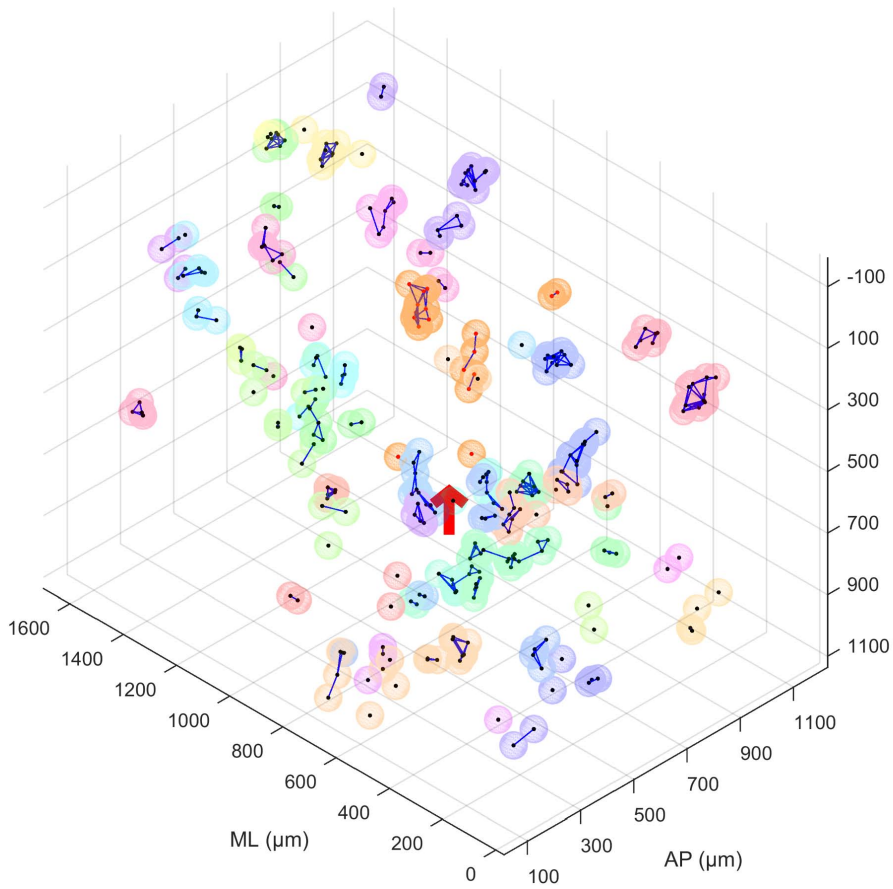

Clone #12

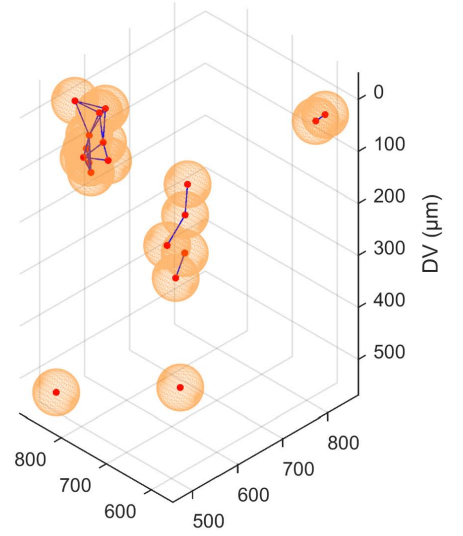

P21 Dataset #1

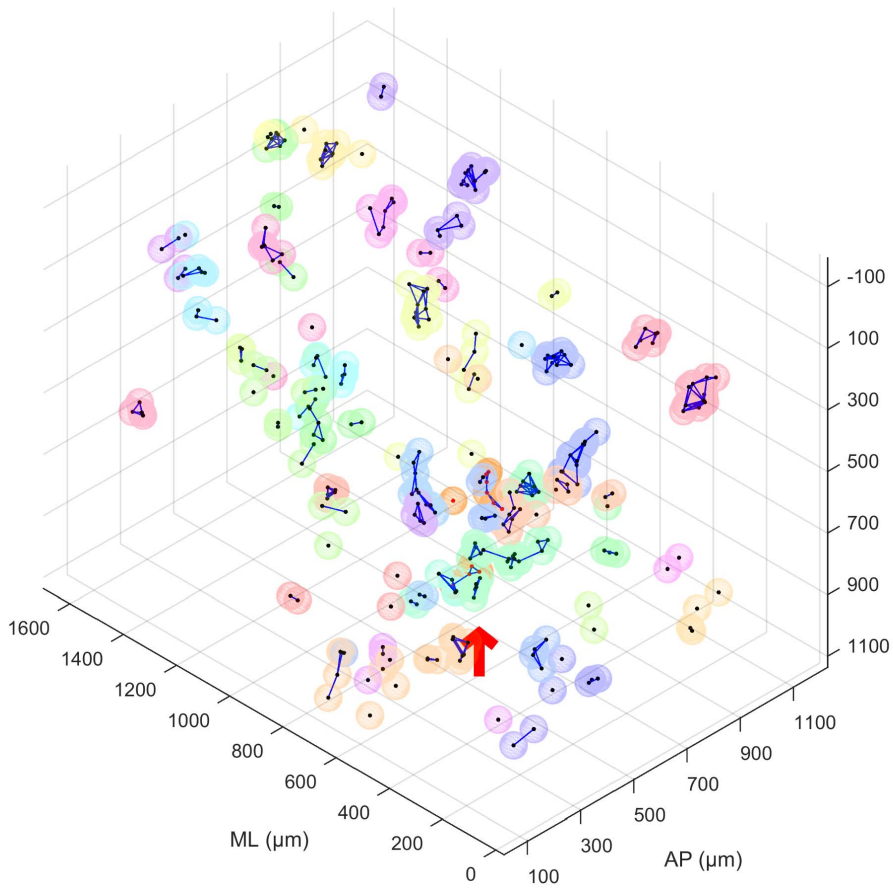

Clone #13

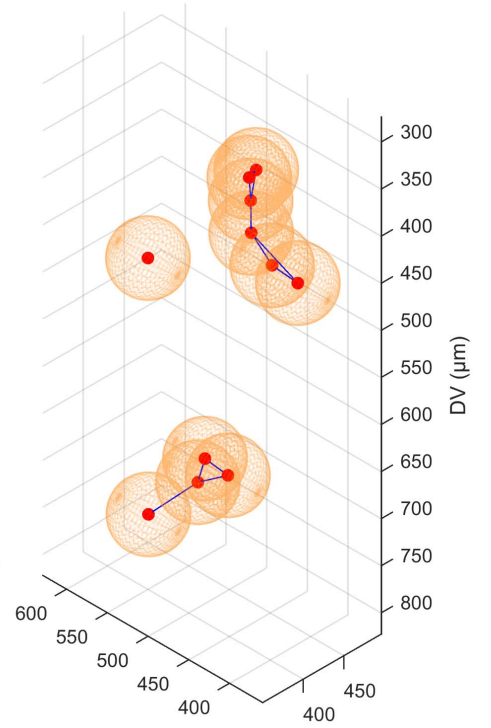

**P21 Dataset #1**

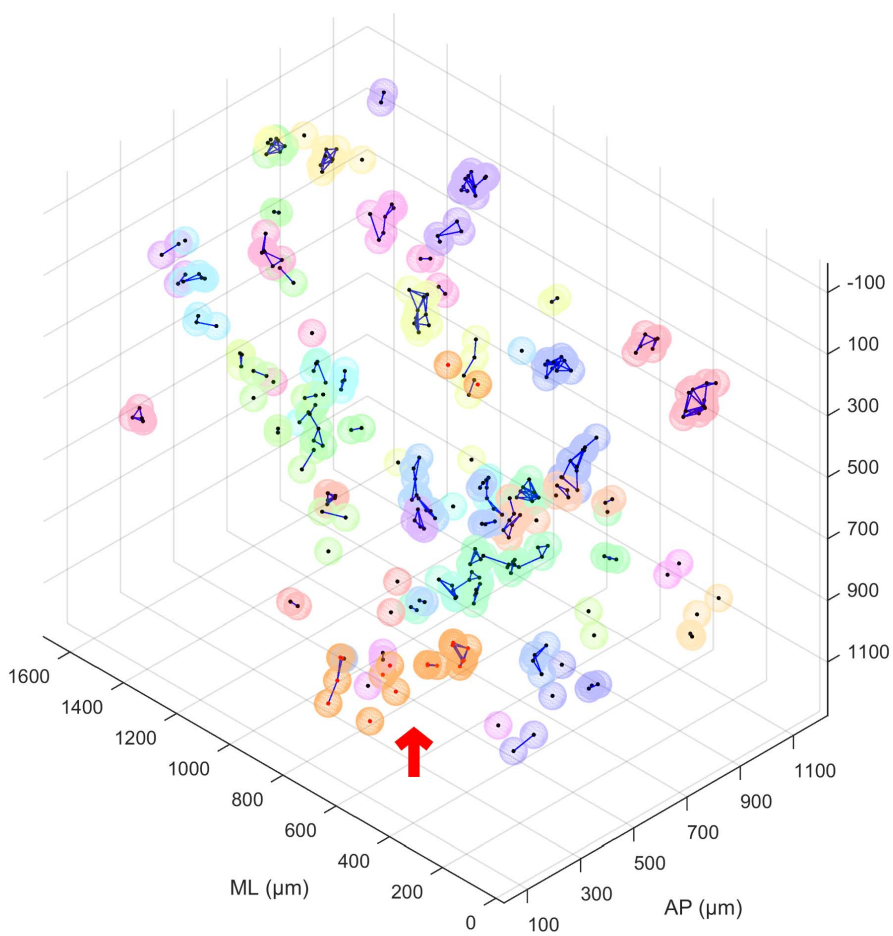

**Clone #14**

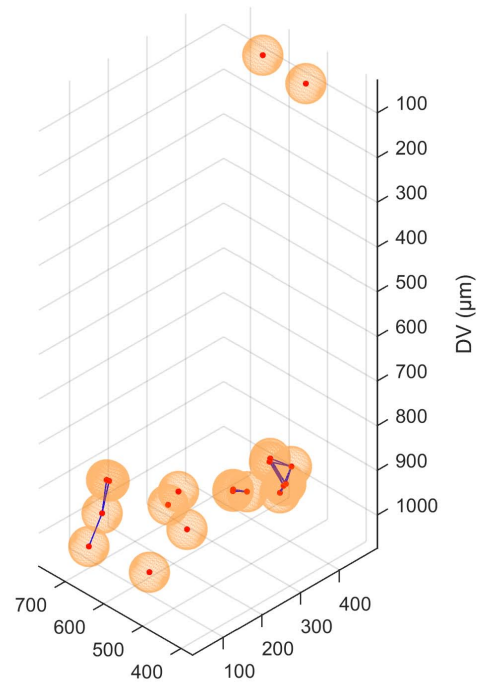



**P21 Dataset #1**

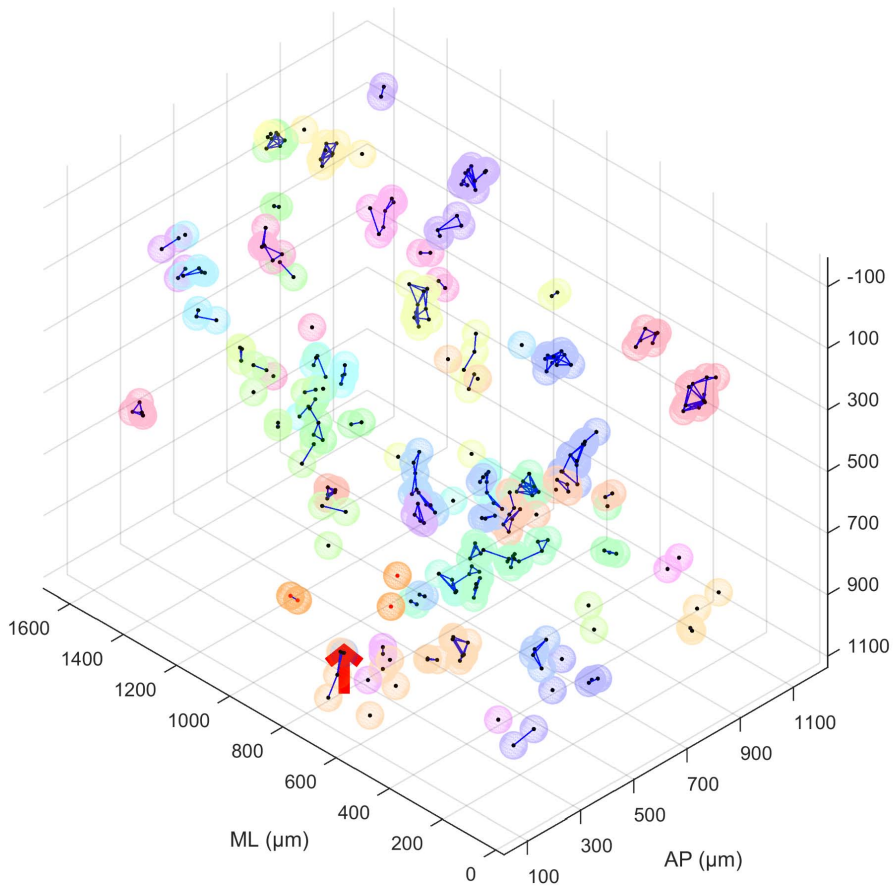

**Clone #15**

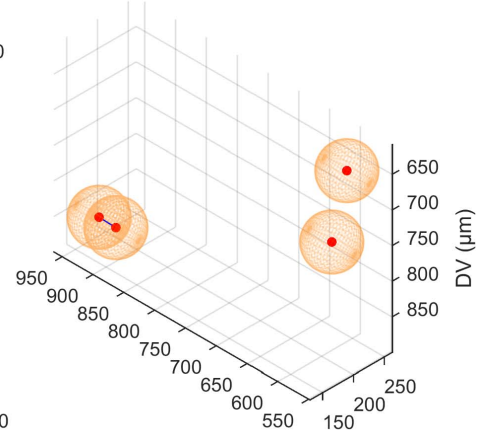

P21 Dataset #1

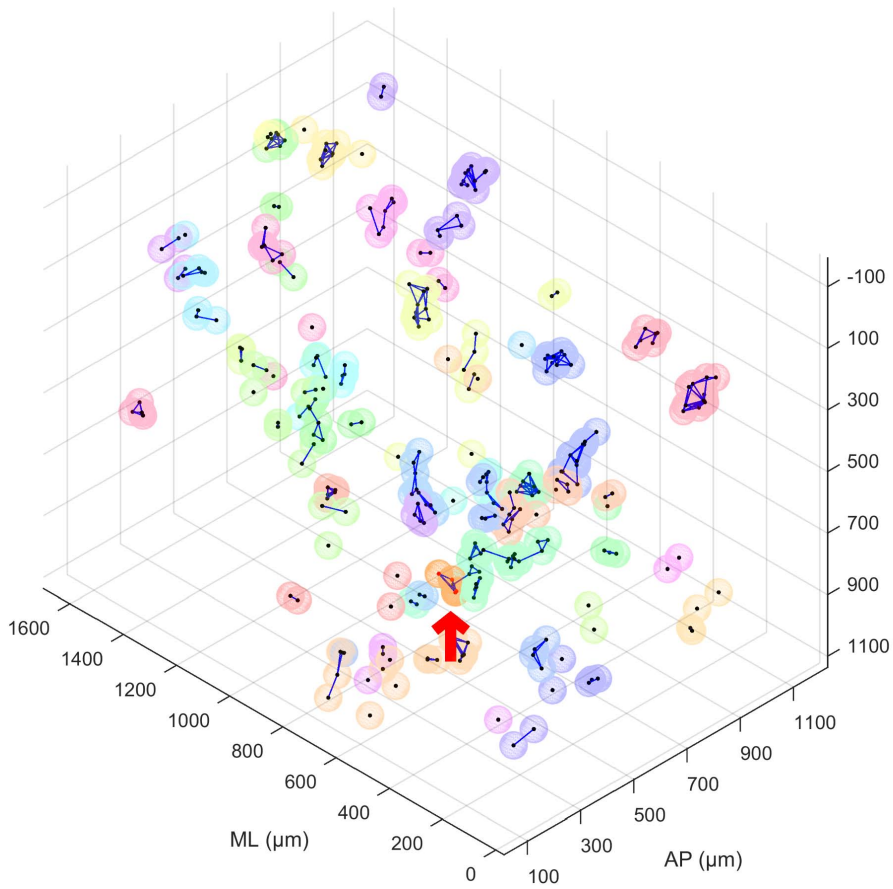

Clone #16

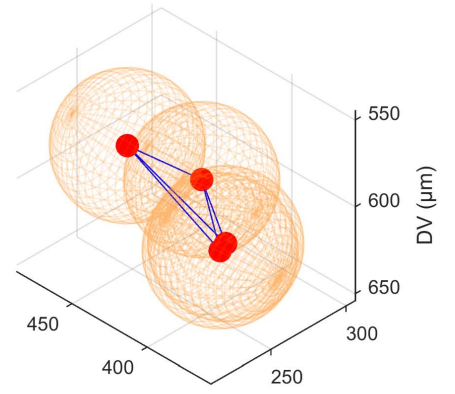

**P21 Dataset #1**

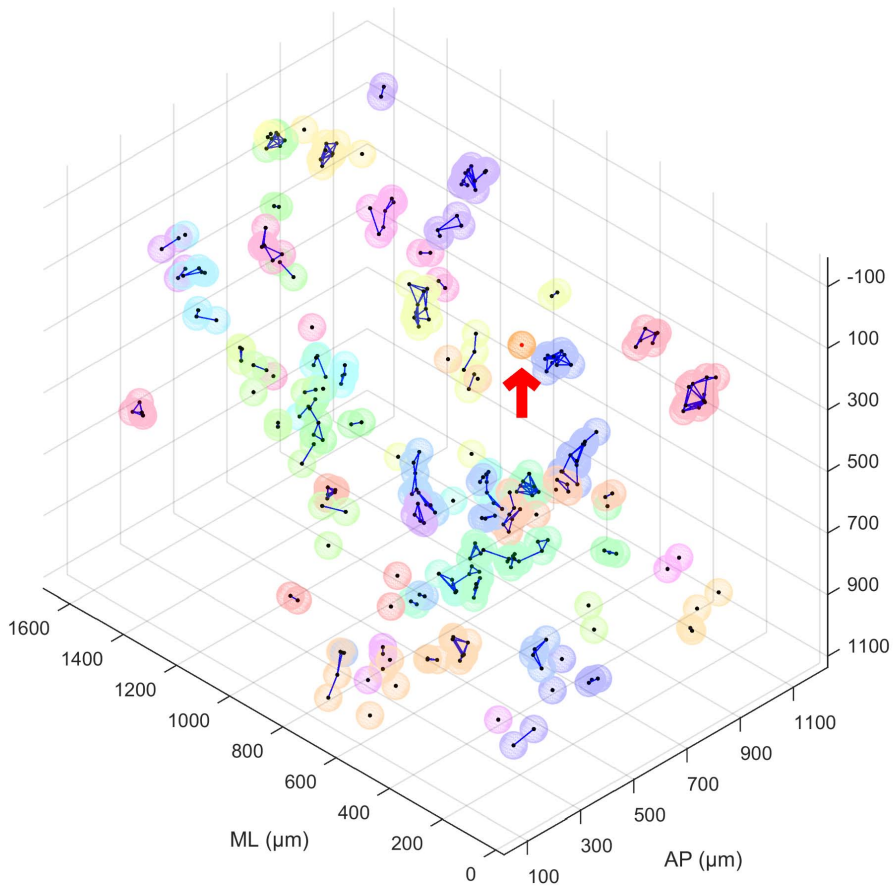

**Clone #17**

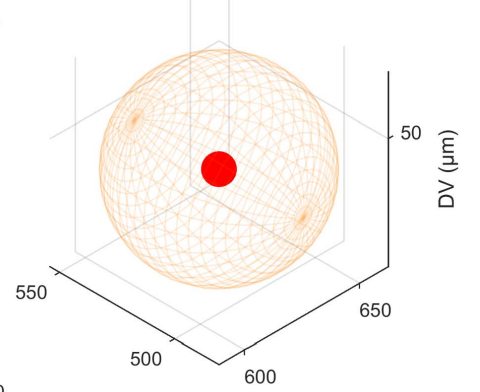

P21 Dataset #1

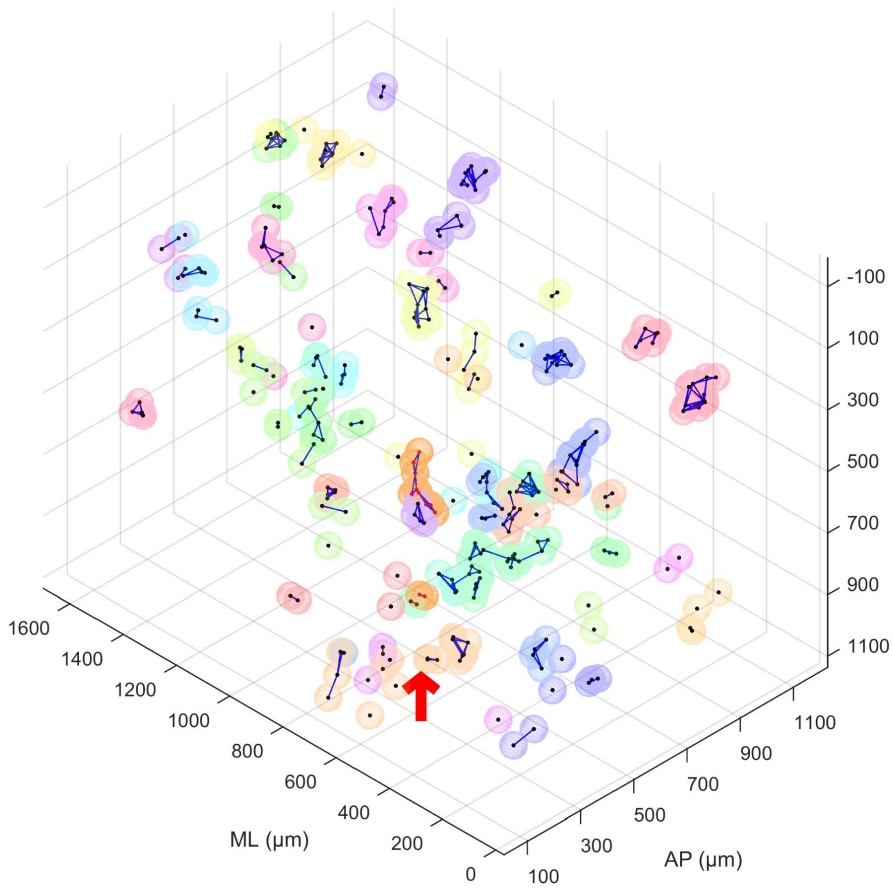

Clone #18

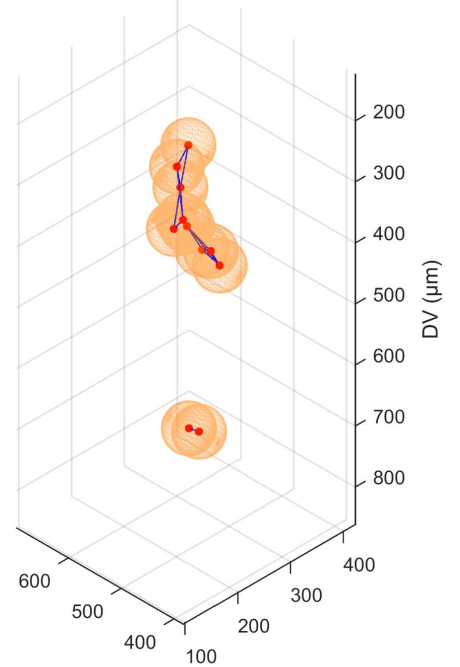

P21 Dataset #1

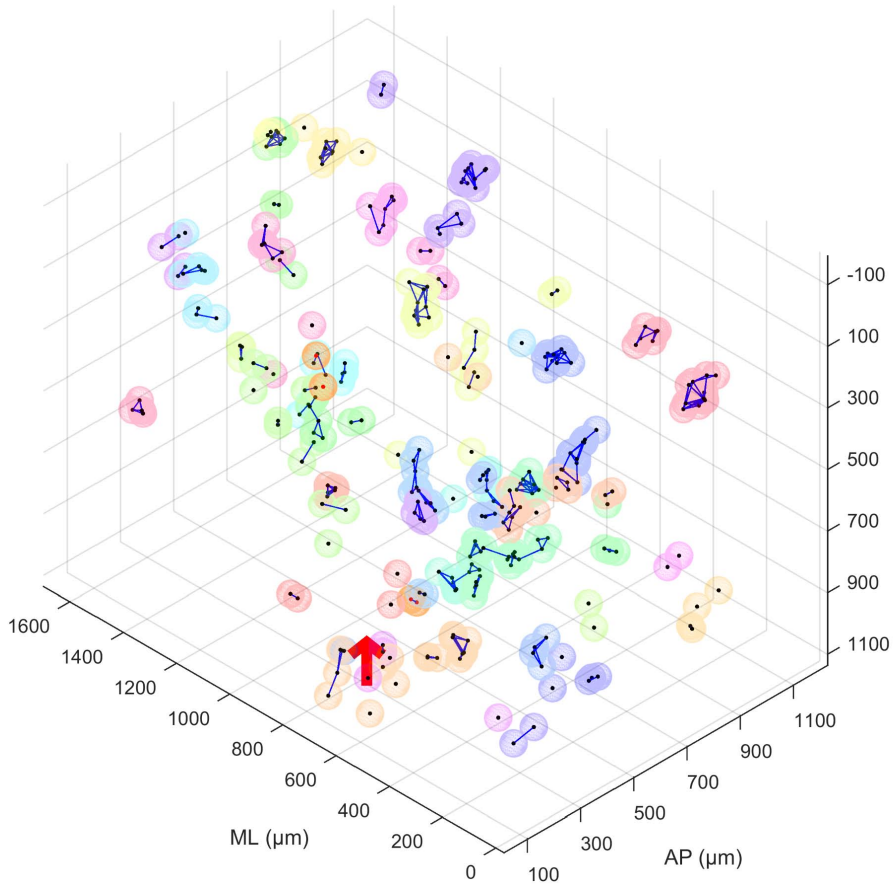

Clone #19

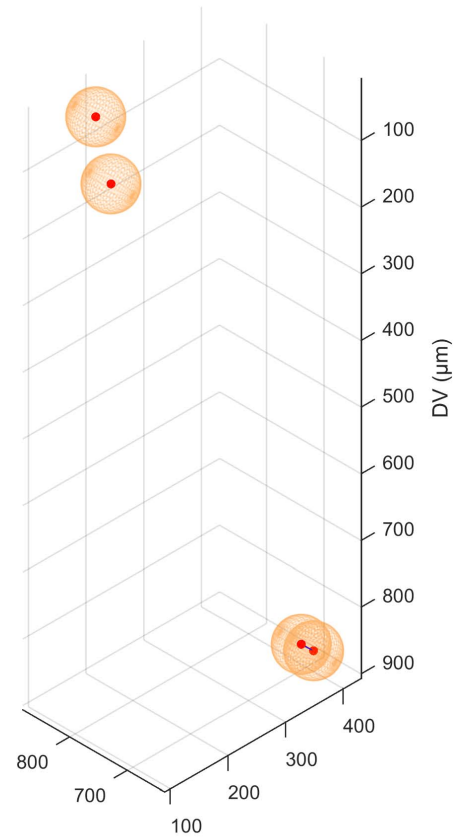

P21 Dataset #1

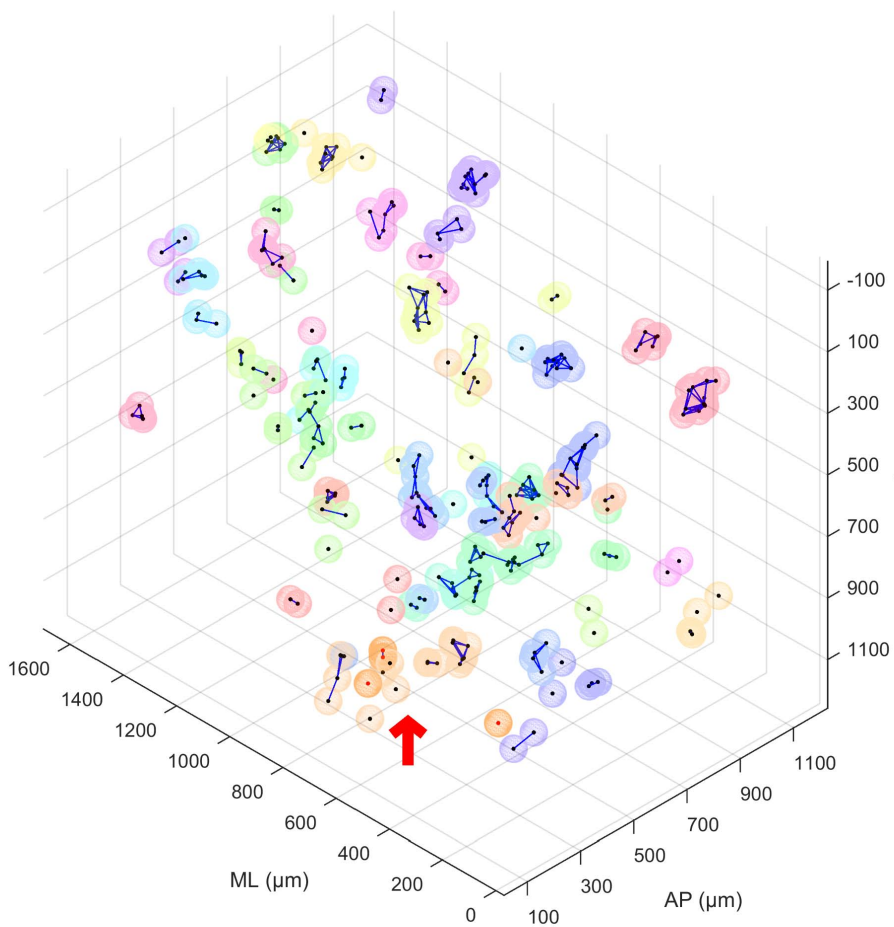

Clone #20

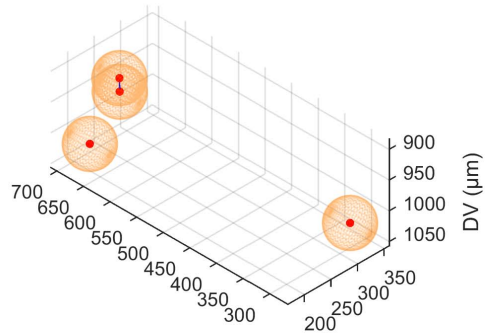

**P21 Dataset #1**

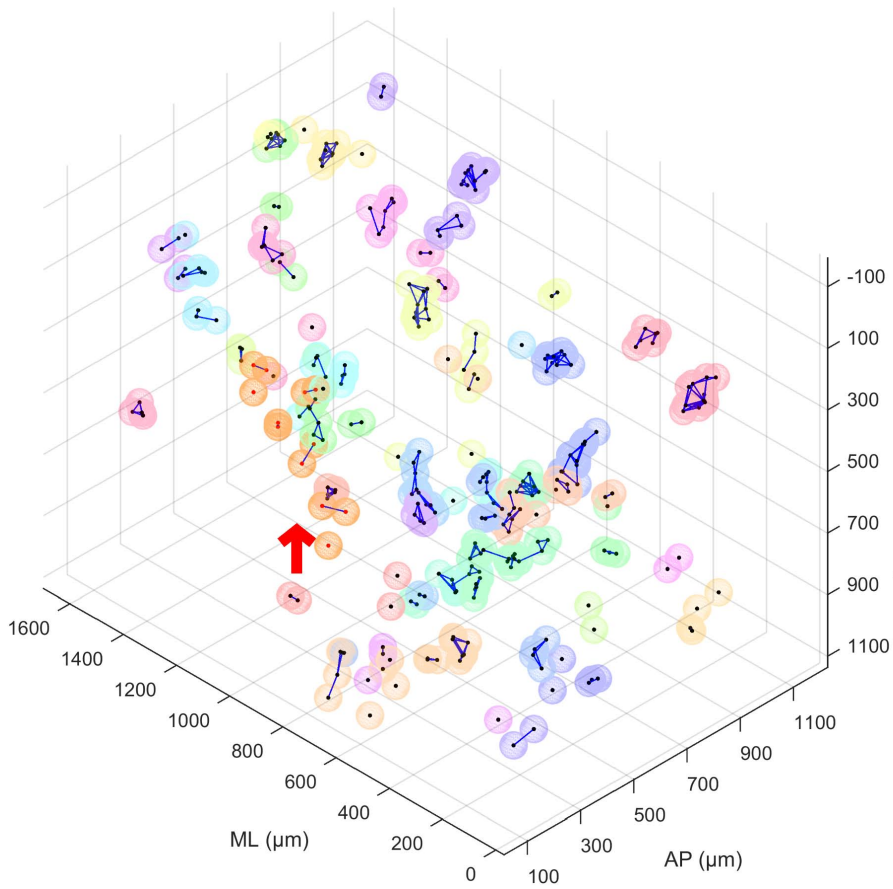

**Clone #21**

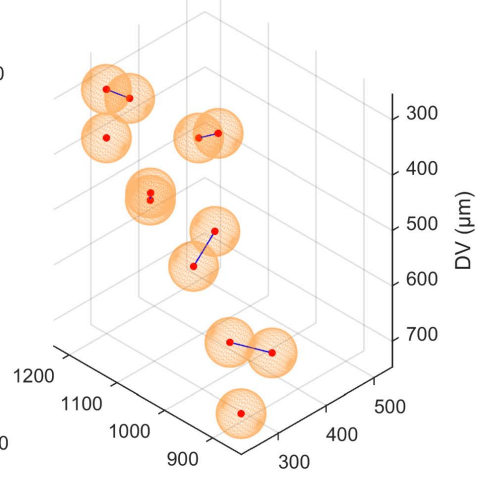

**P21 Dataset #1**

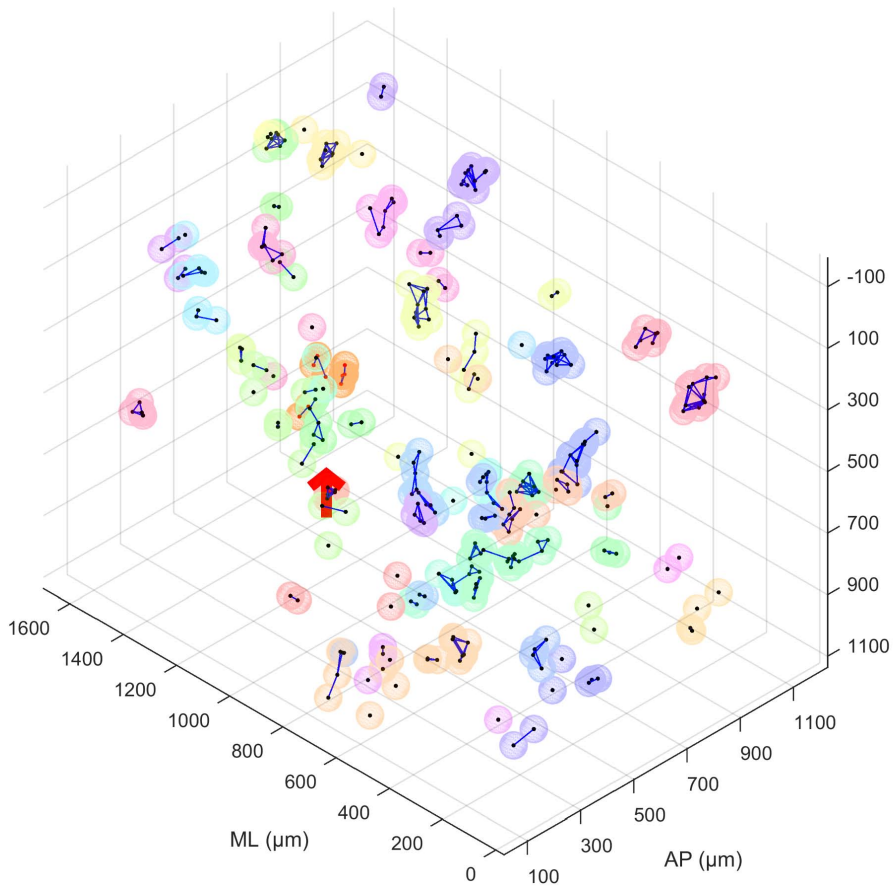

**Clone #22**

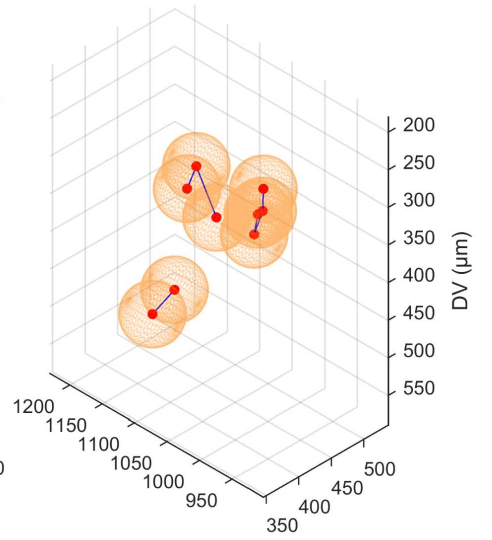



**P21 Dataset #1**

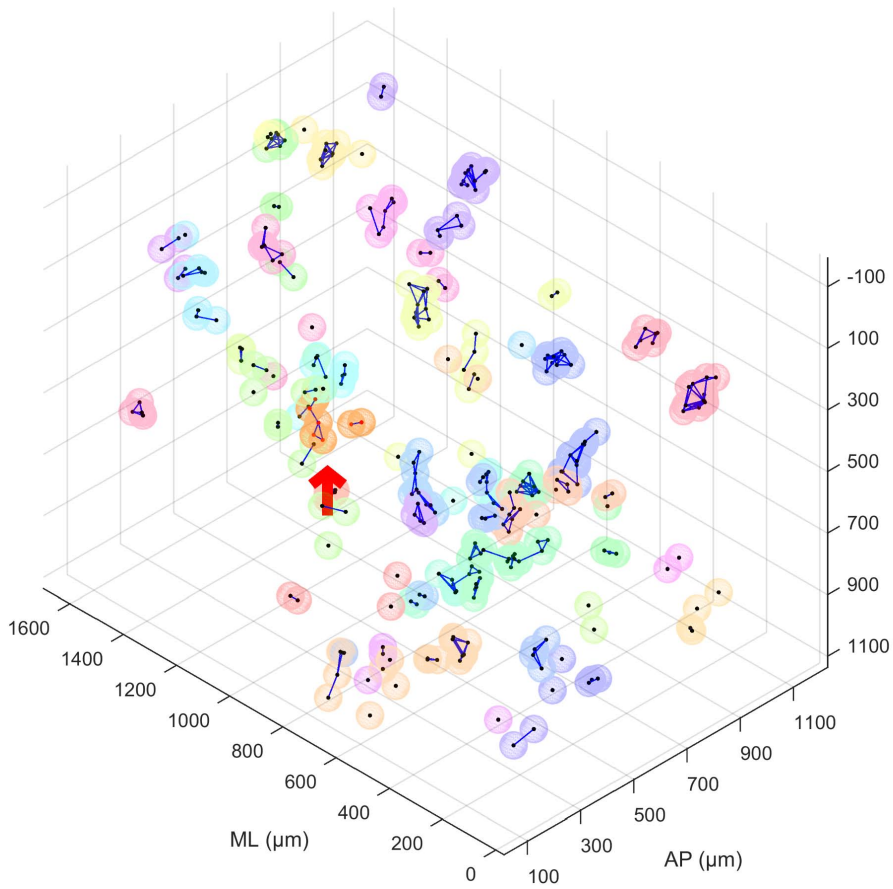

**Clone #23**

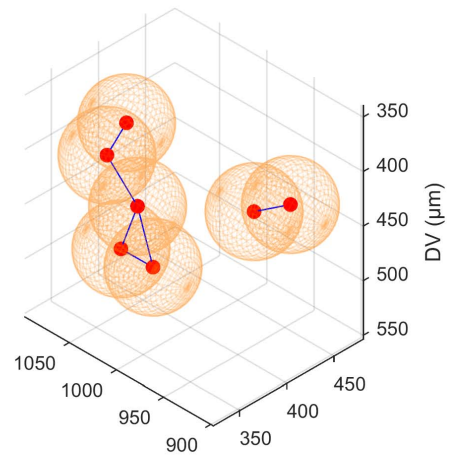

P21 Dataset #1

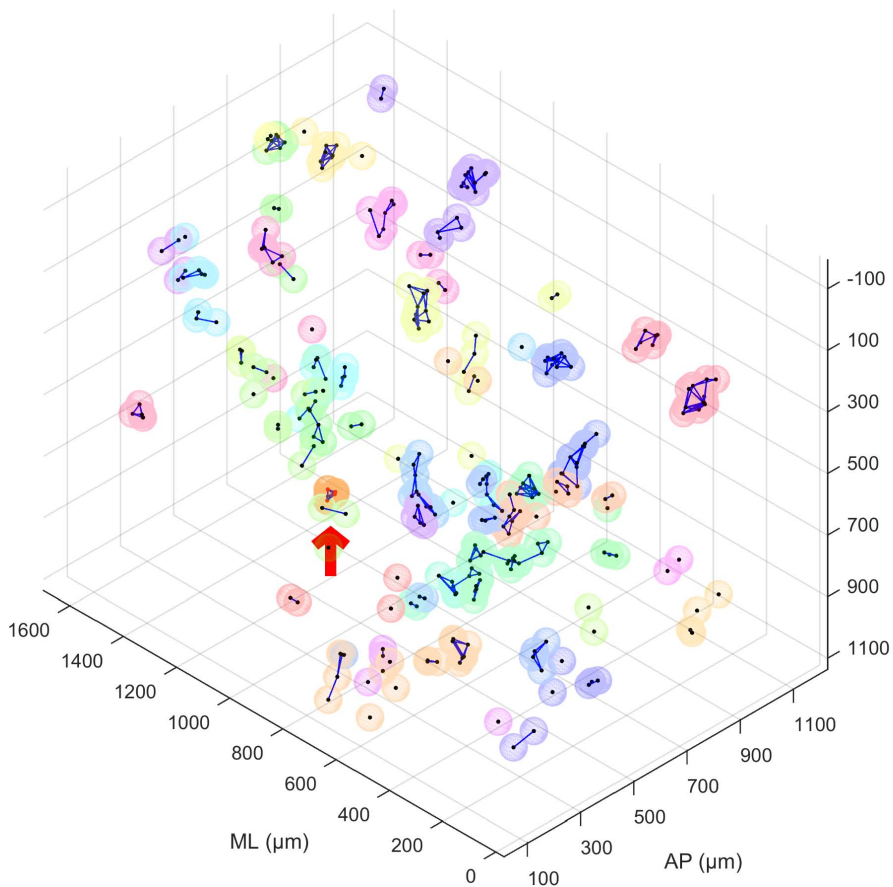

Clone #24

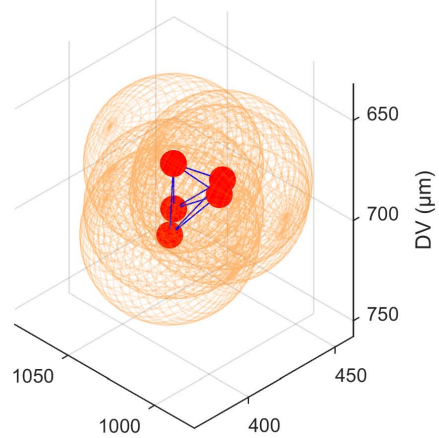

P21 Dataset #1

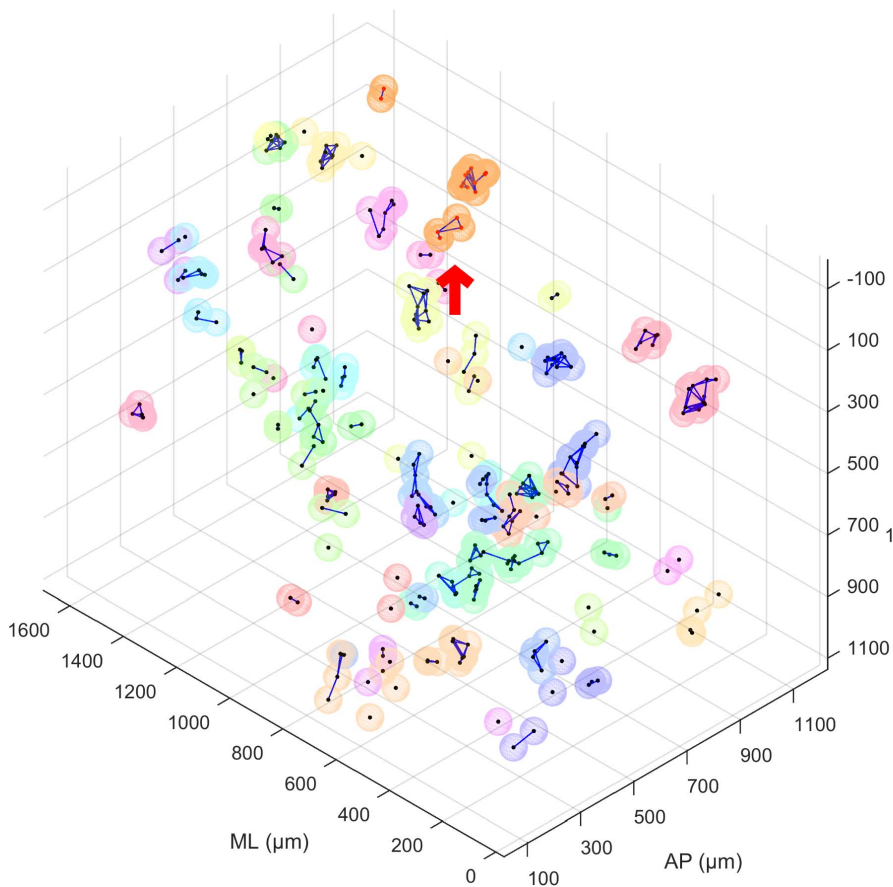

Clone #26

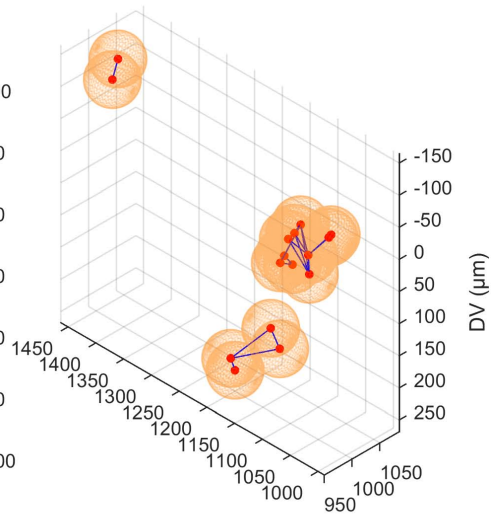

P21 Dataset #1

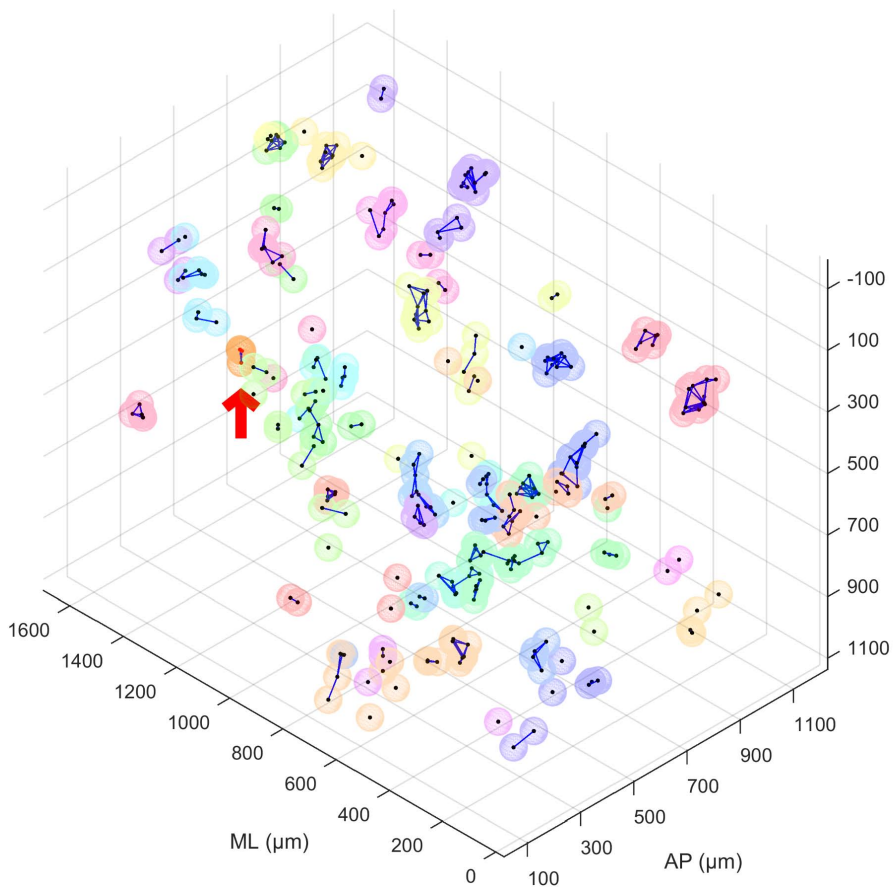

Clone #27

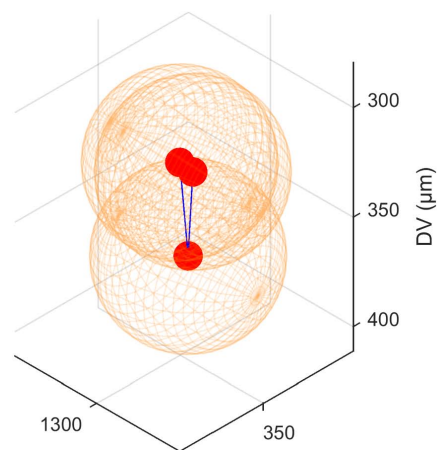

**P21 Dataset #1**

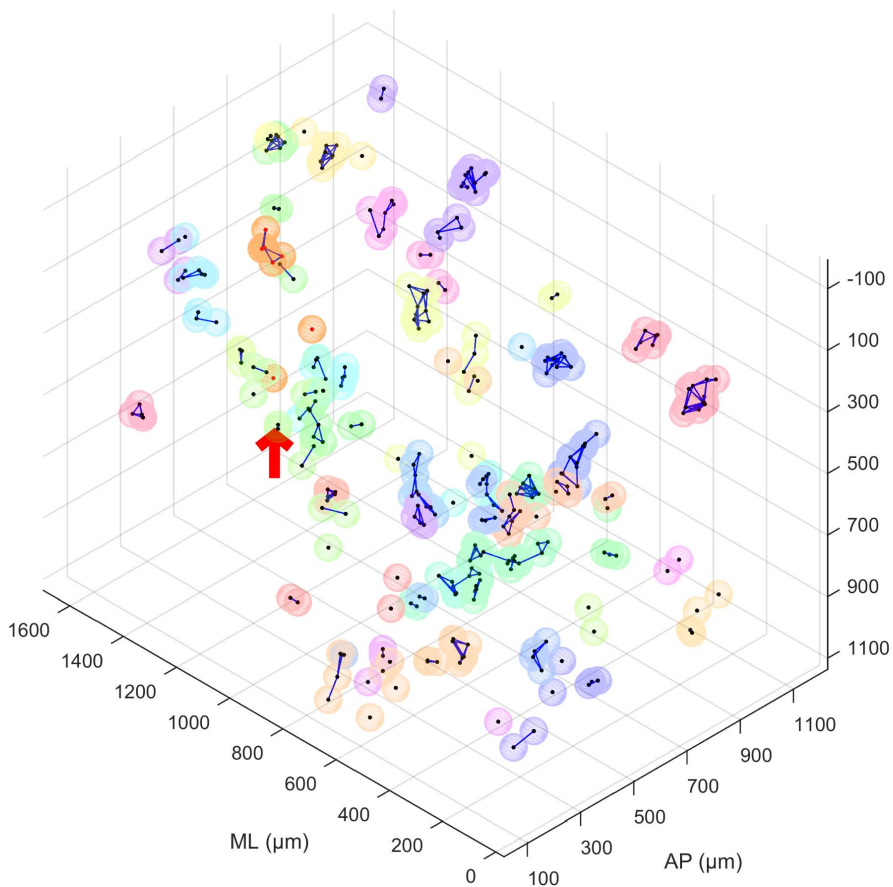

**Clone #28**

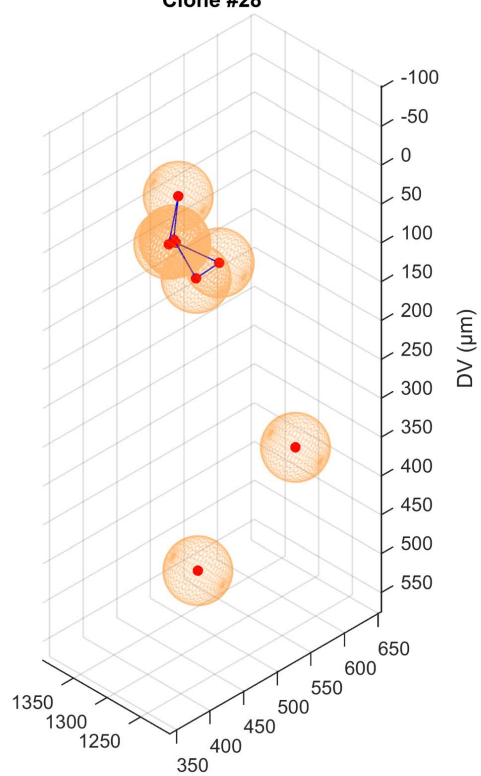

P21 Dataset #1

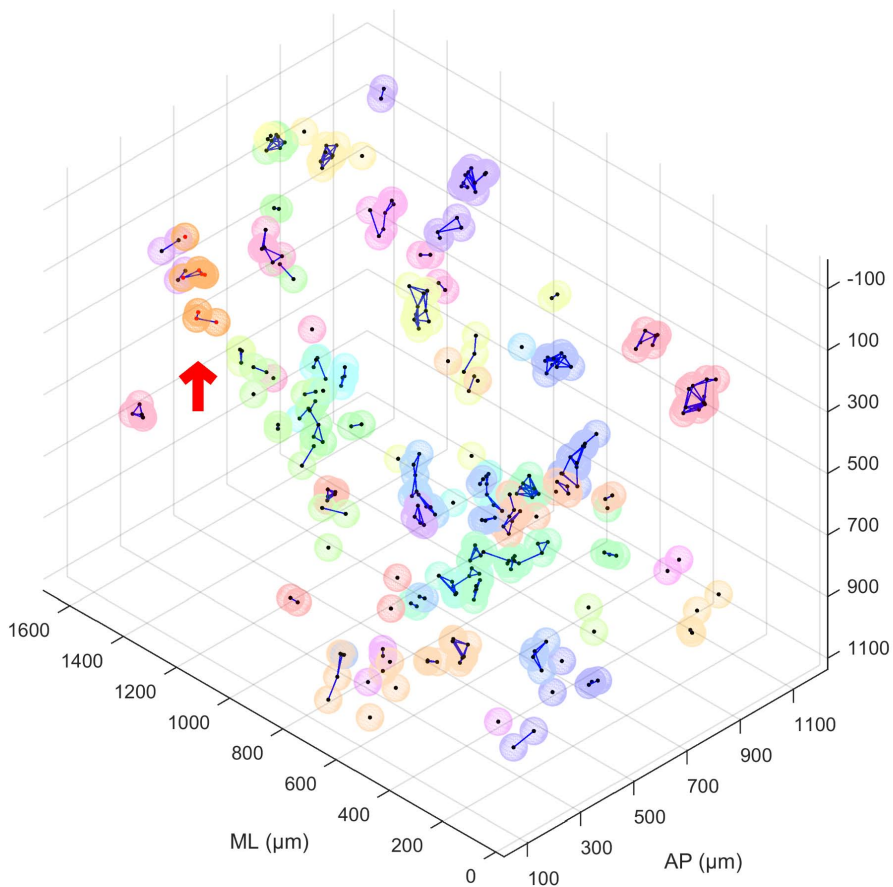

Clone #29

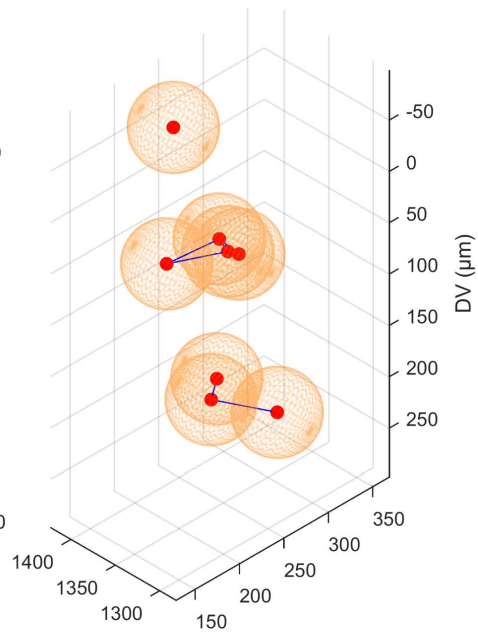

P21 Dataset #1

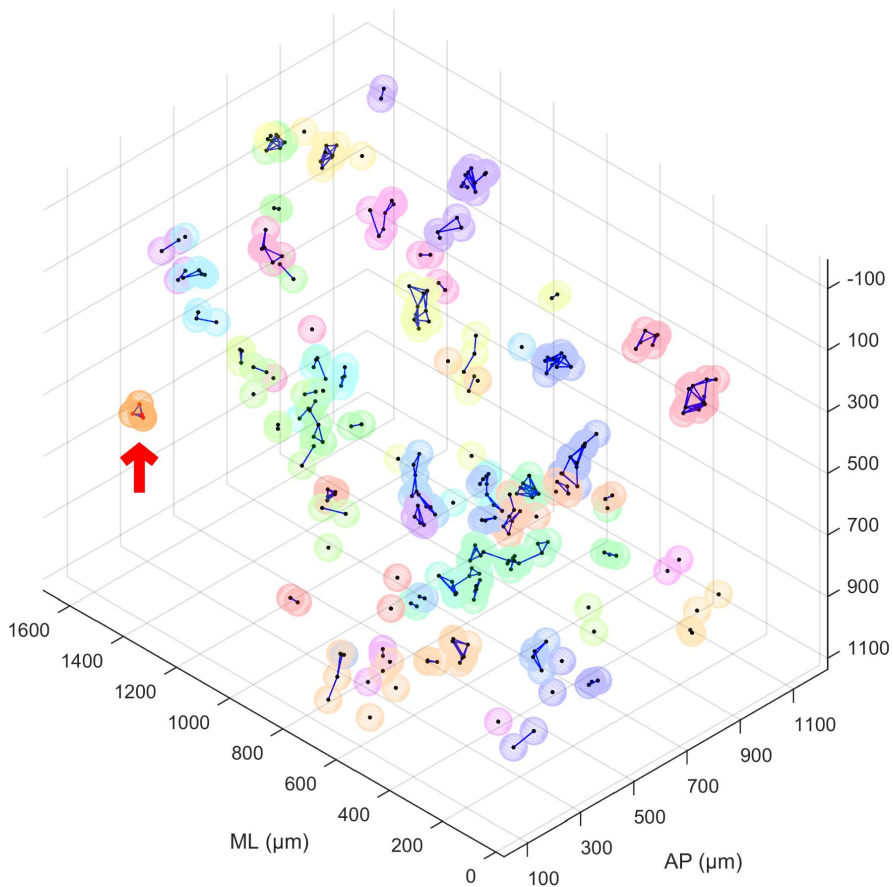

Clone #30

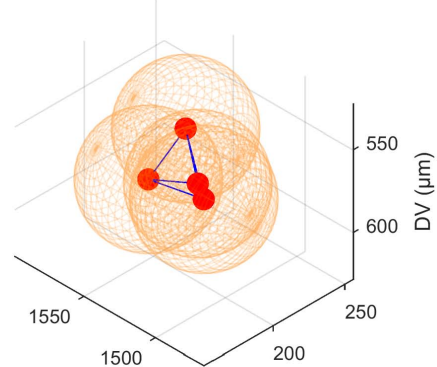

**P21 Dataset #1**

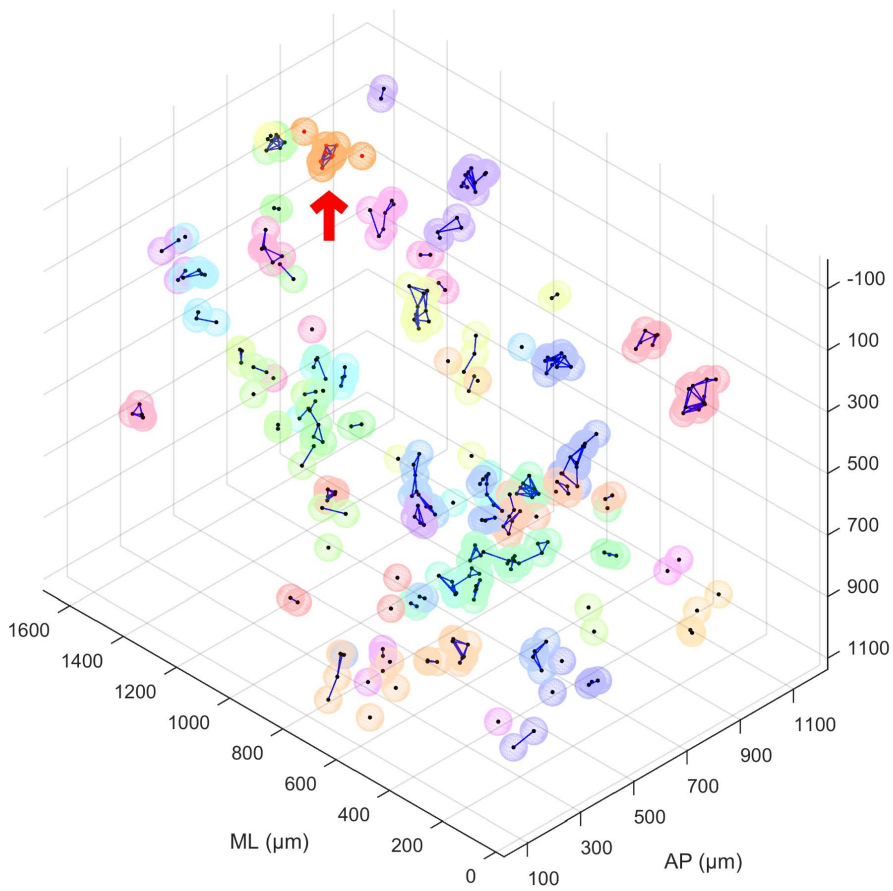

**Clone #31**

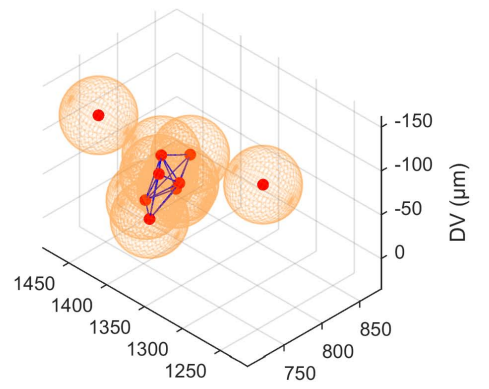



P21 Dataset #1

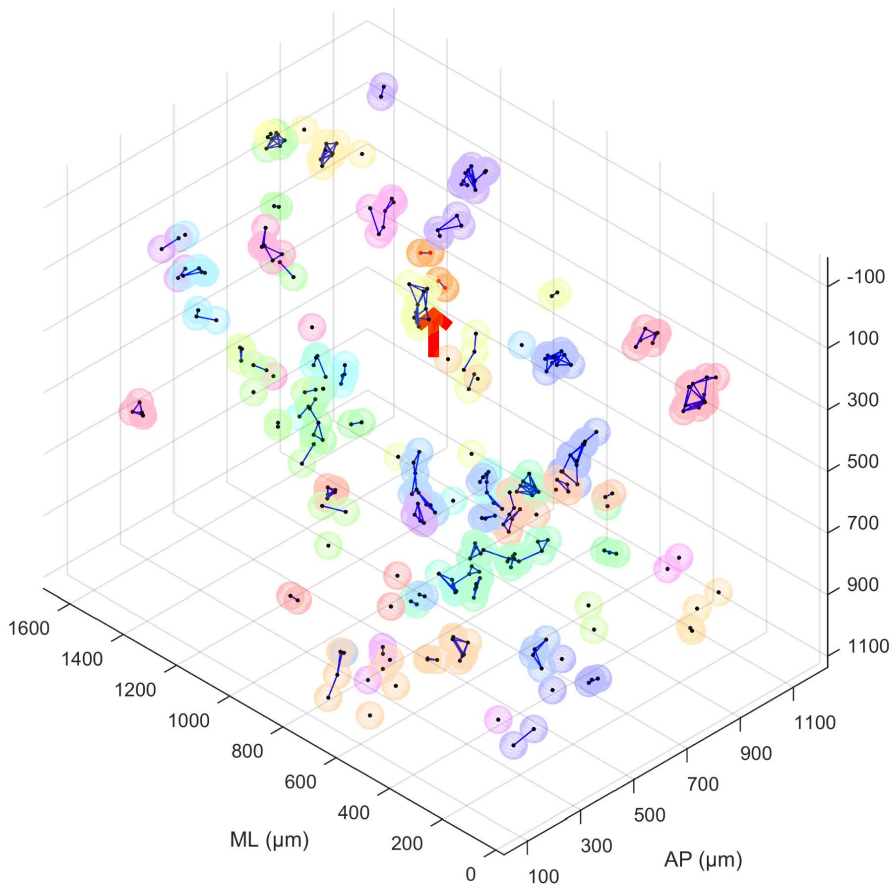

Clone #32

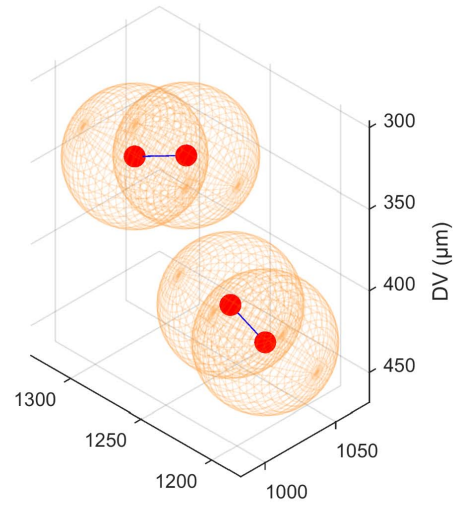

P21 Dataset #1

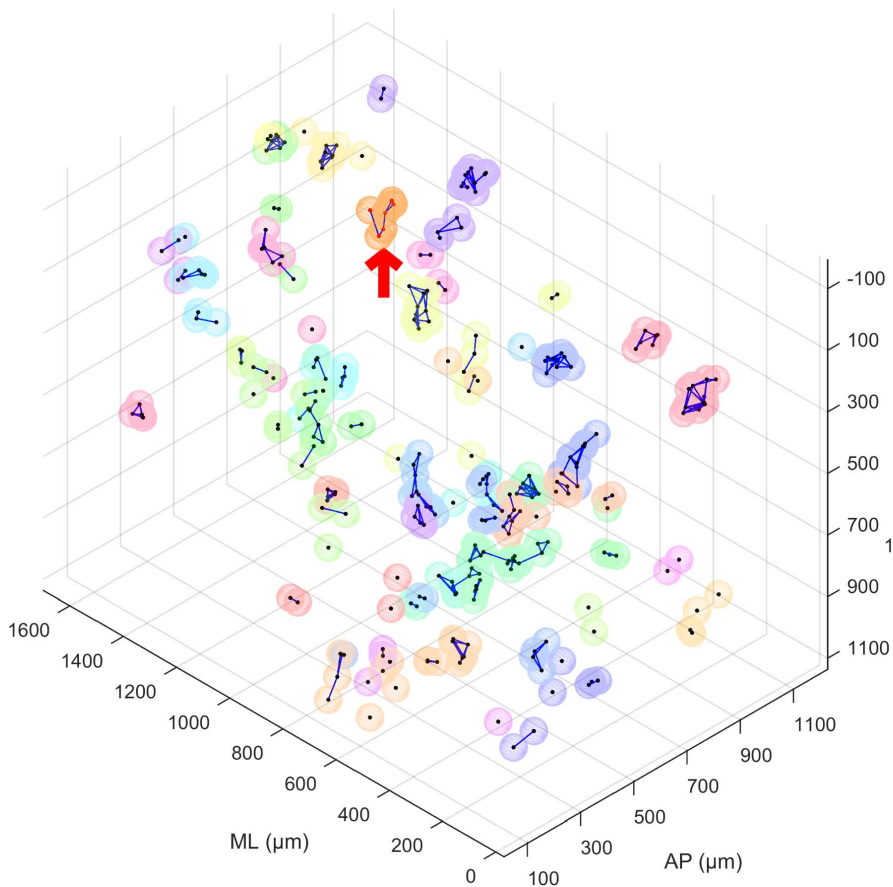

Clone #33

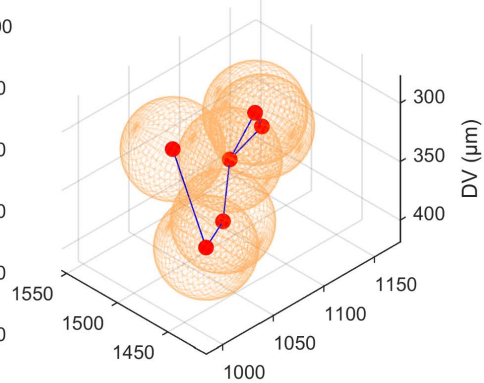

**P21 Dataset #1**

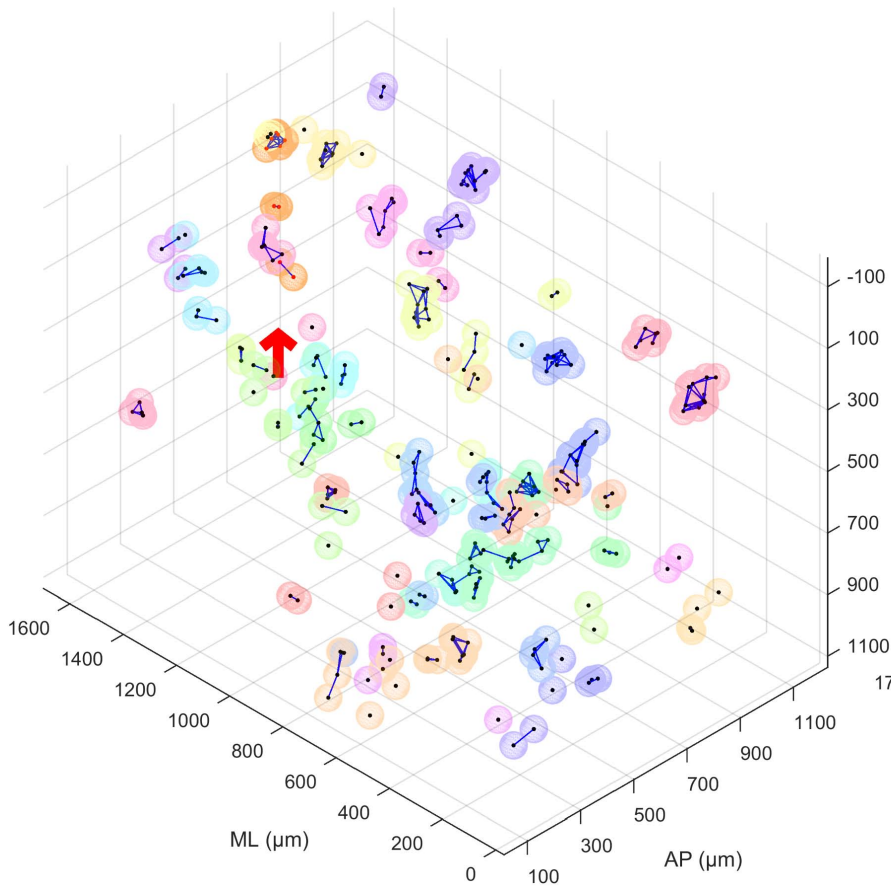

**Clone #34**

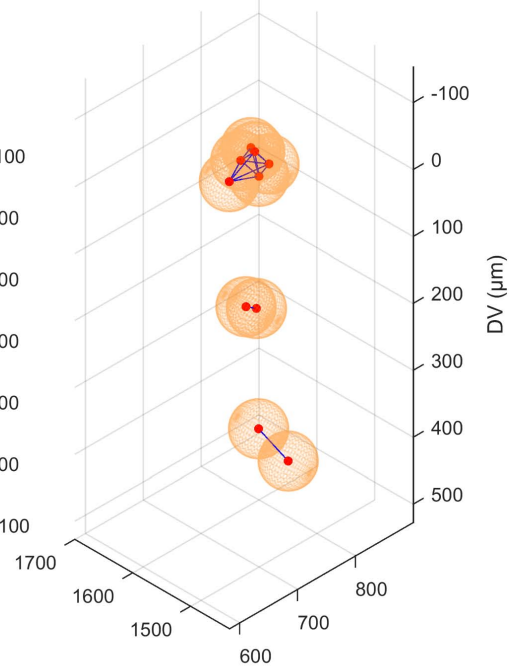

P21 Dataset #1

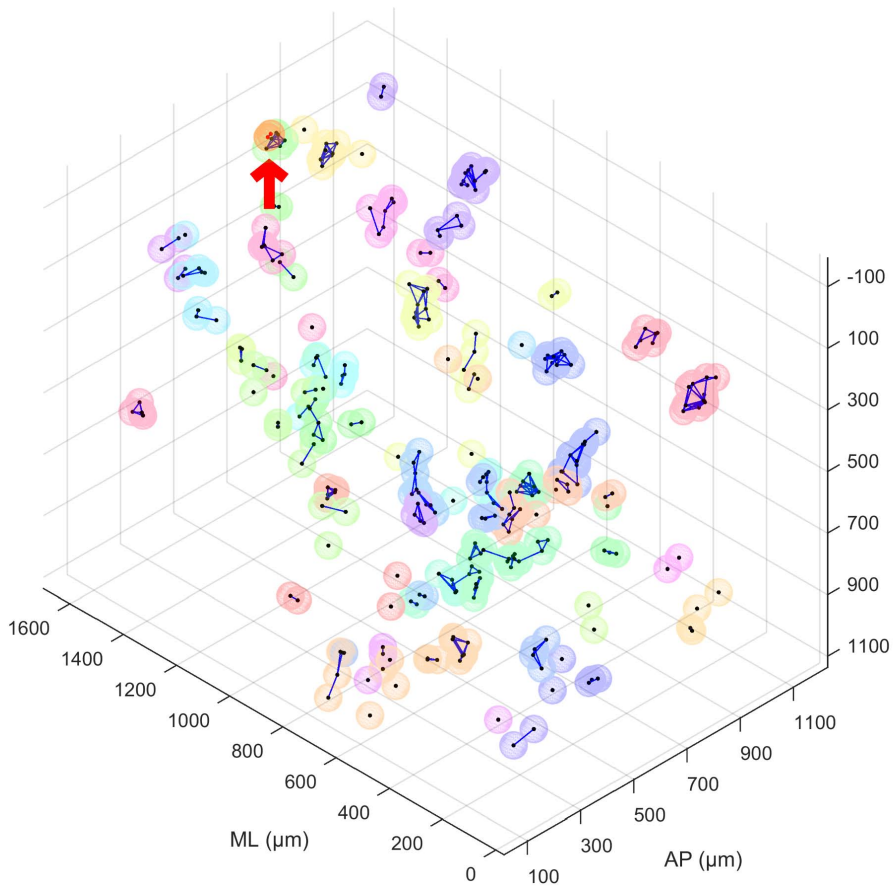

Clone #35

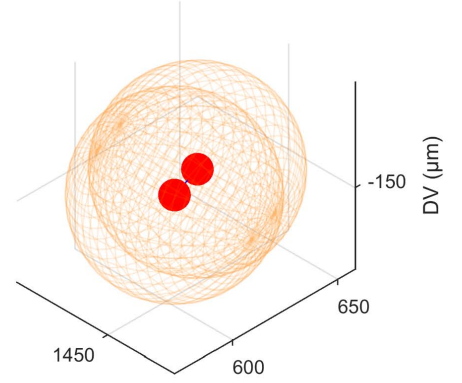

P21 Dataset #1

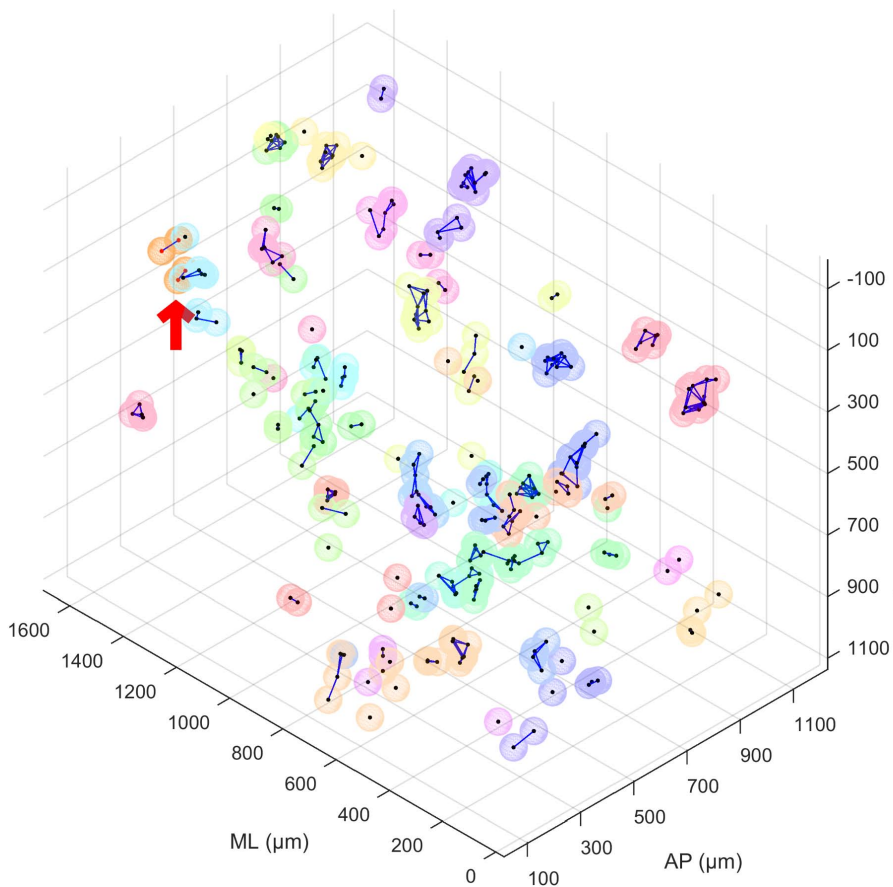

Clone #36

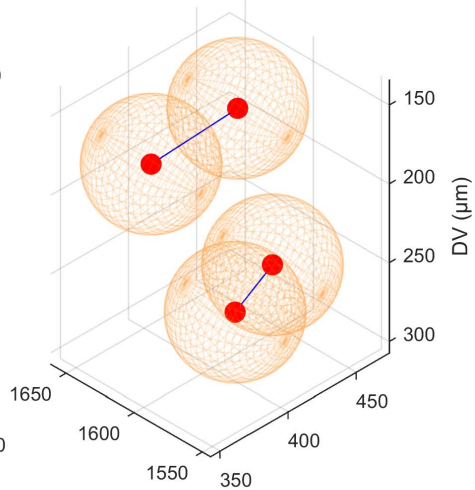

P21 Dataset #1

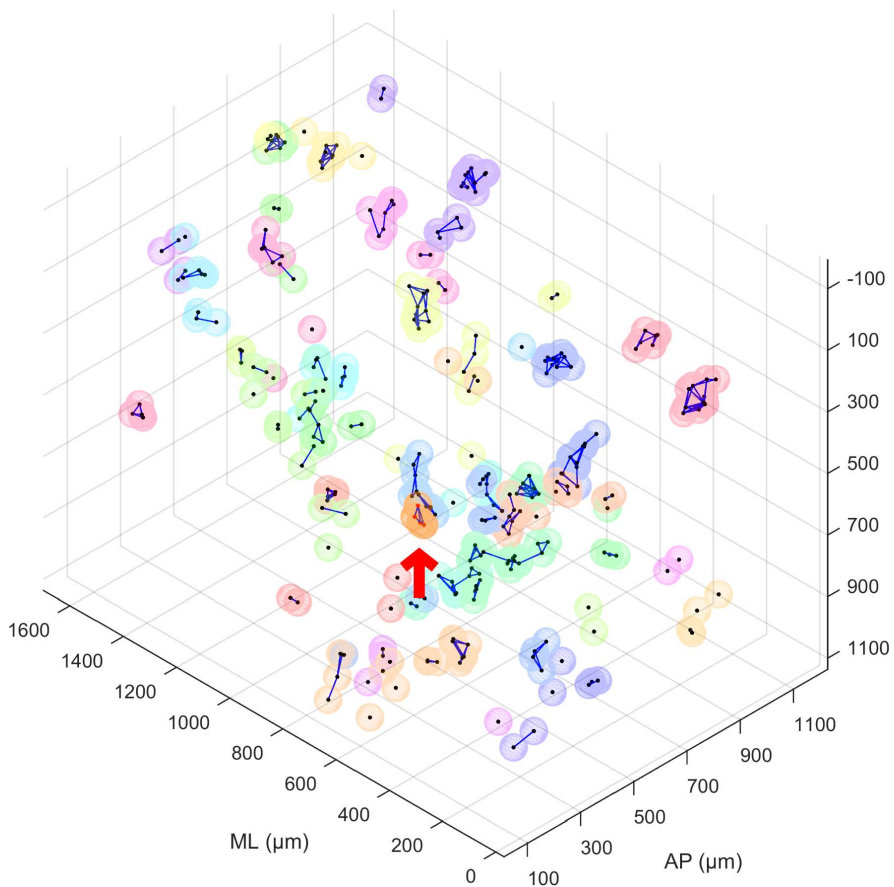

Clone #37

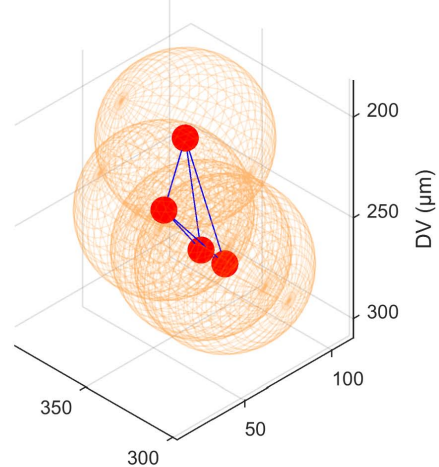

P21 Dataset #2

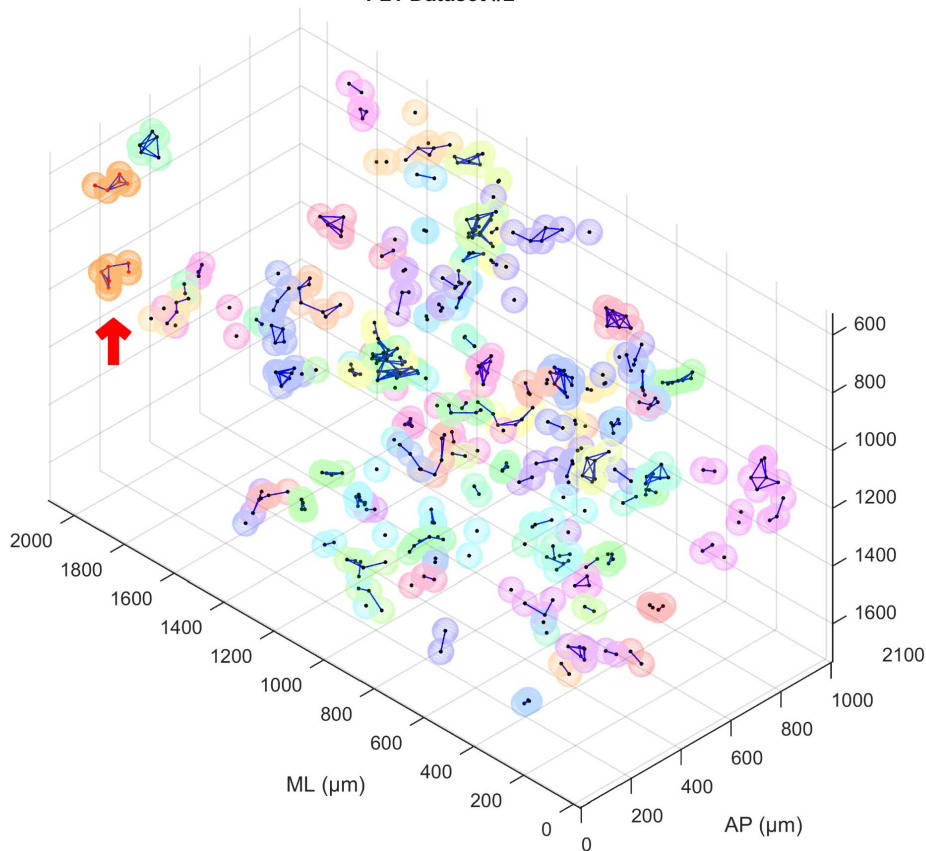

Clone #1

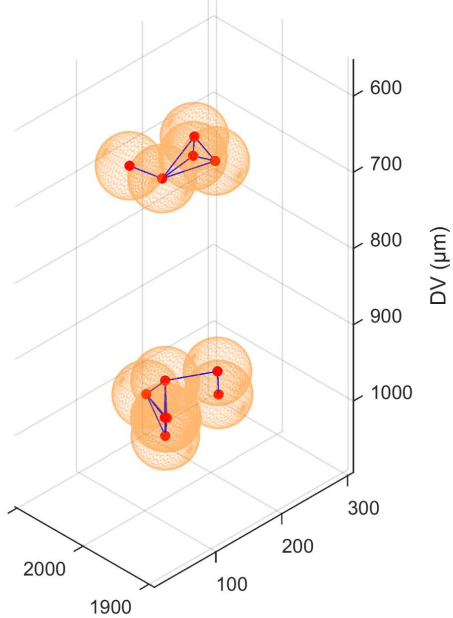

P21 Dataset #2

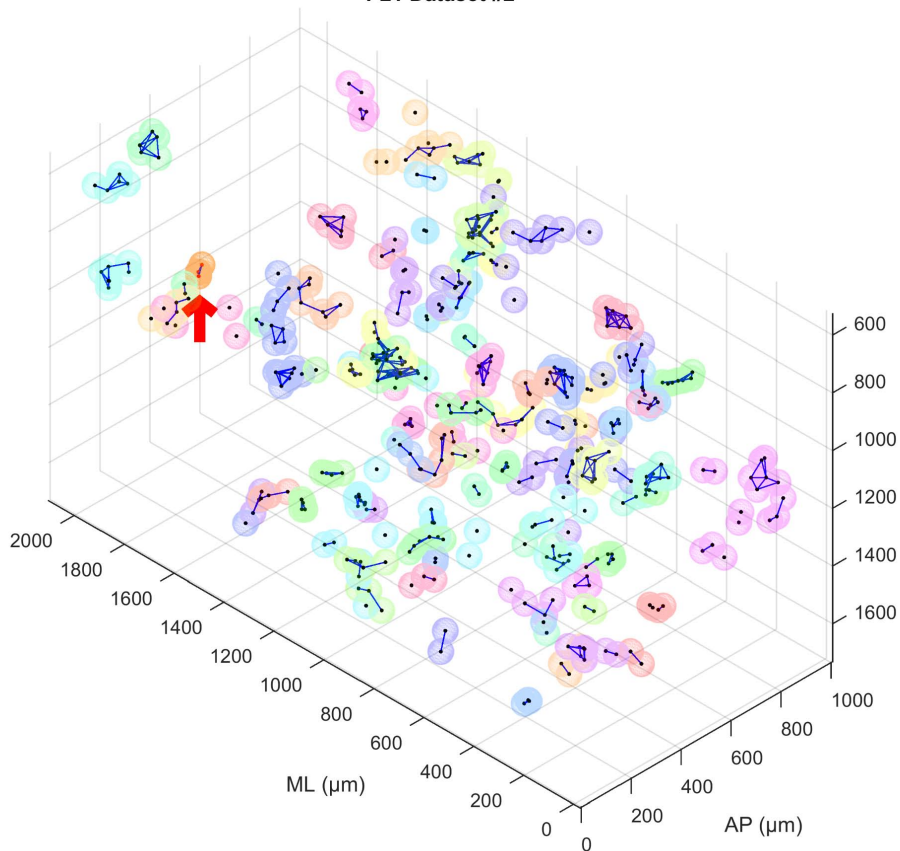

Clone #2

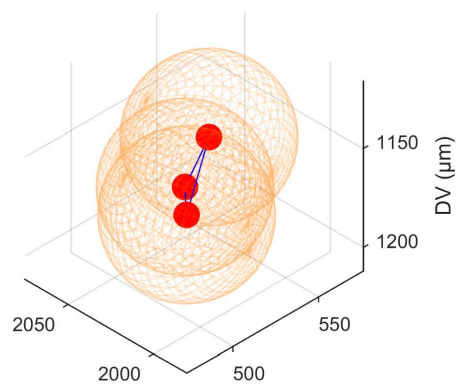



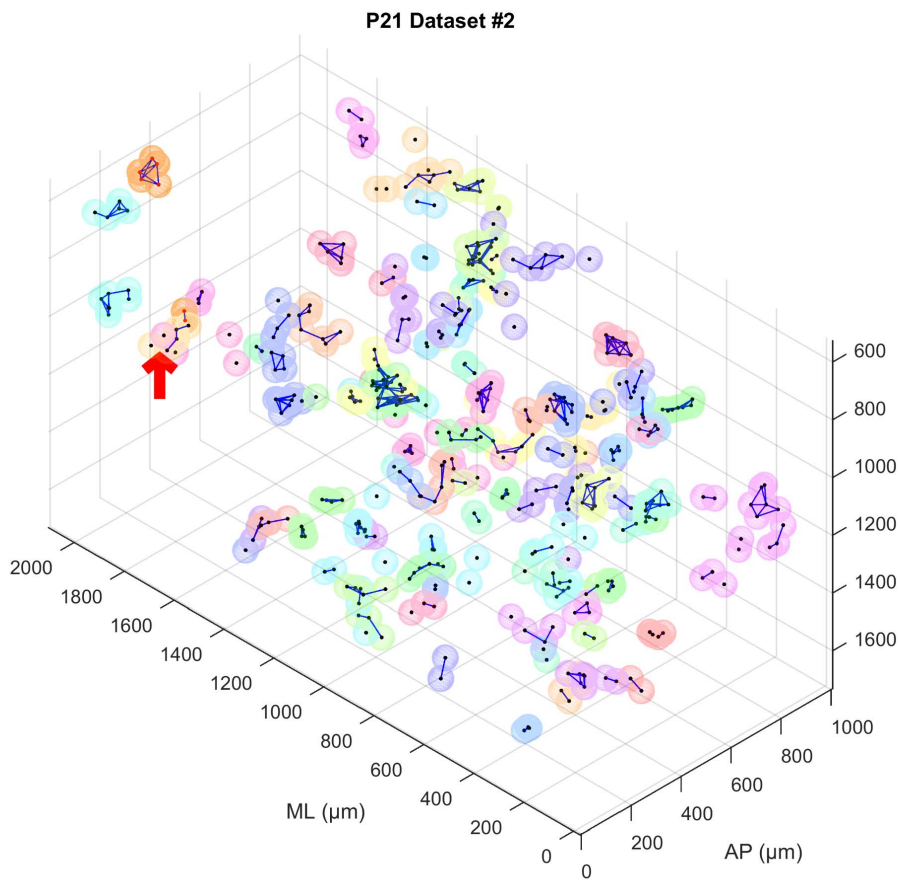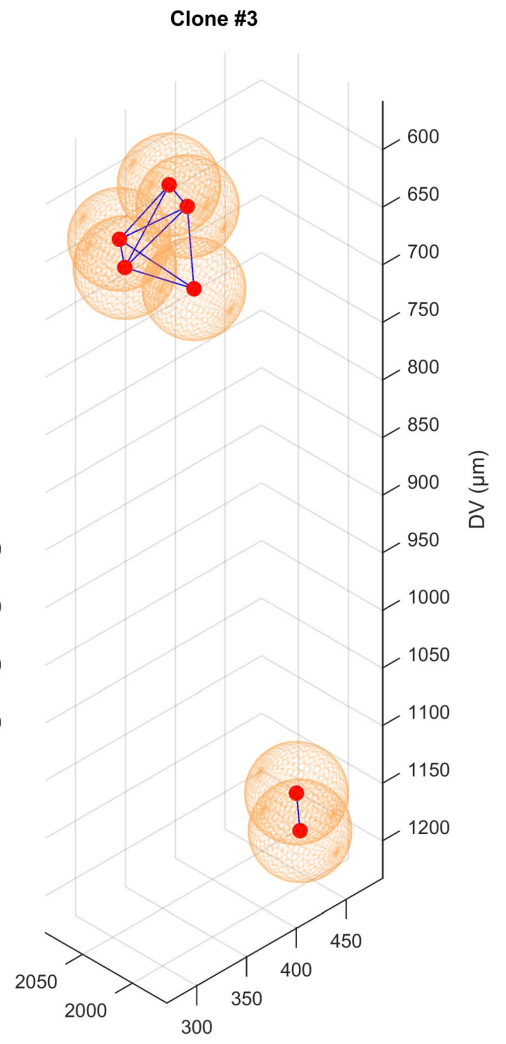

P21 Dataset #2

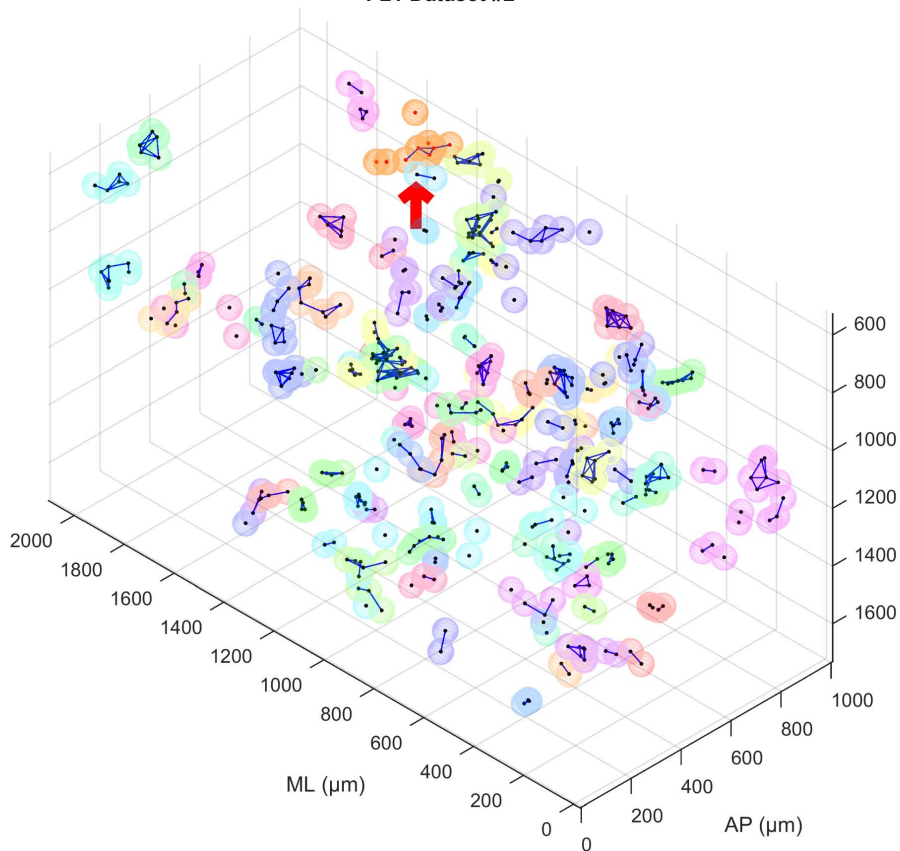

Clone #4

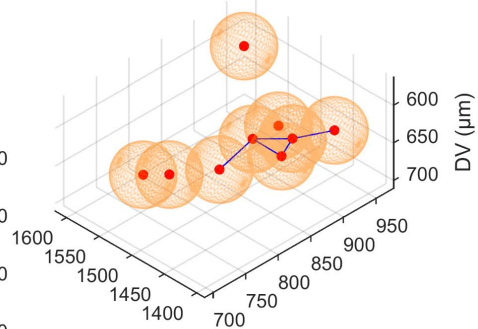

P21 Dataset #2

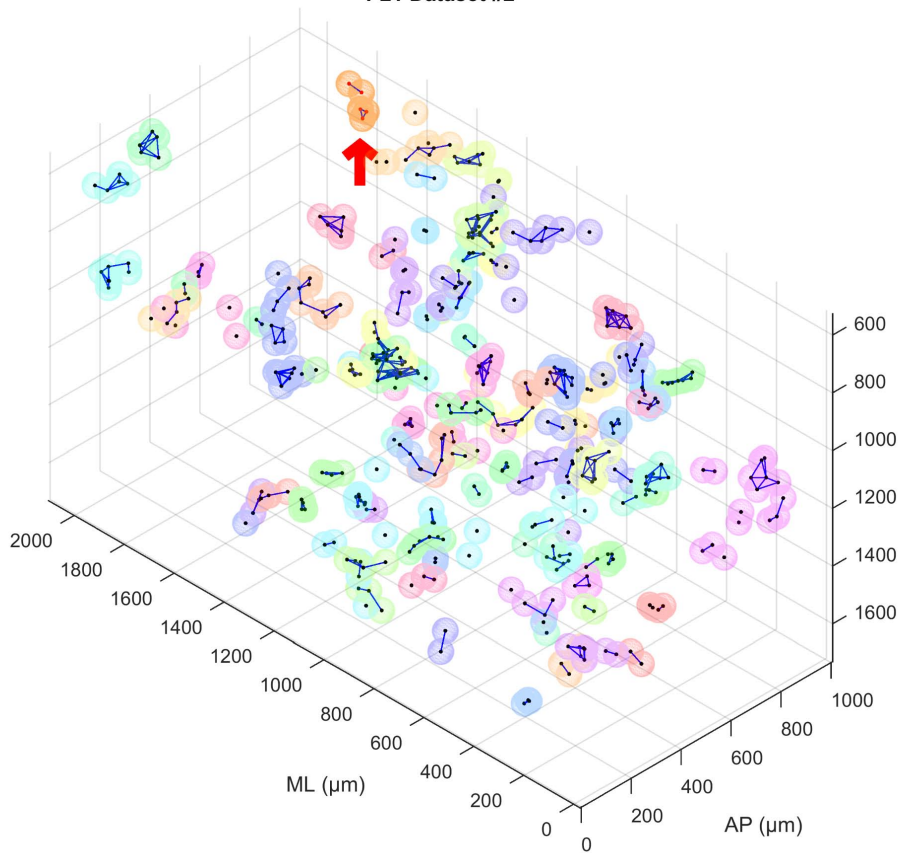

Clone #5

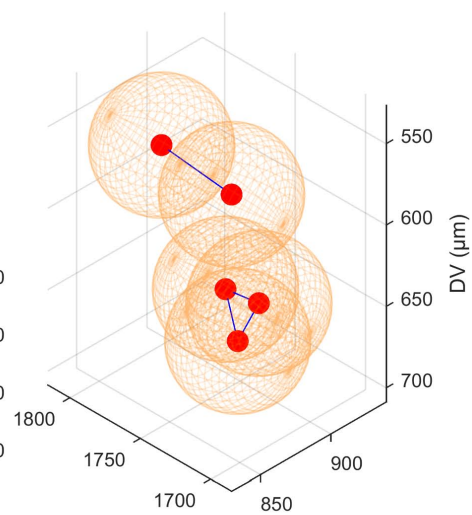

**P21 Dataset #2**

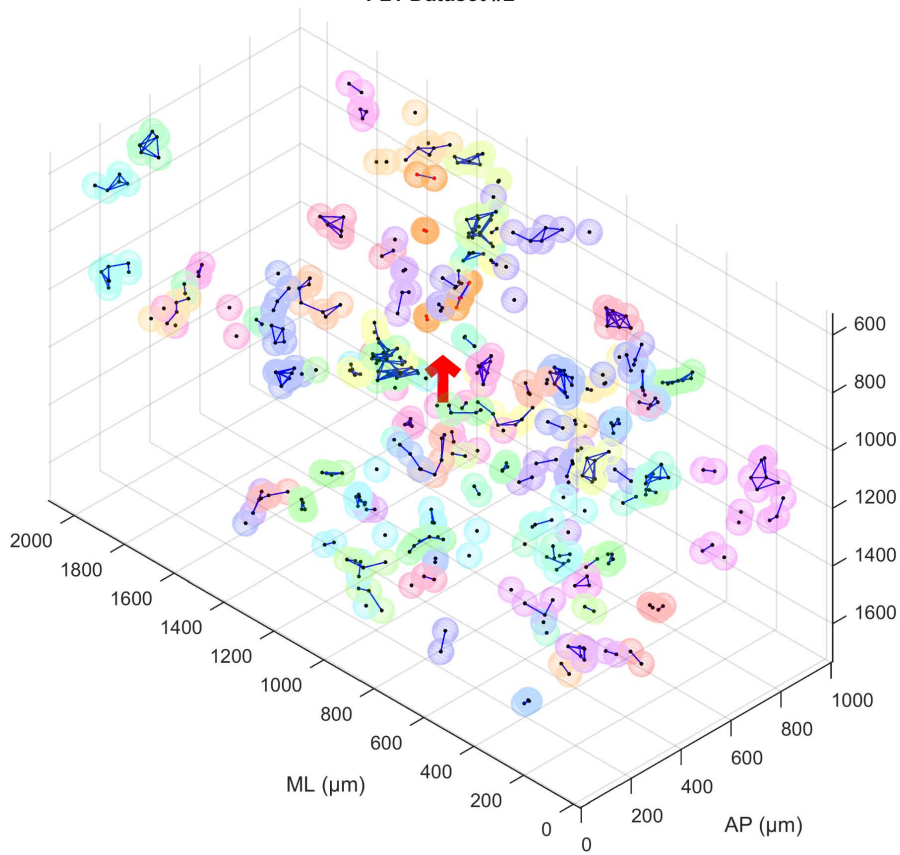

**Clone #6**

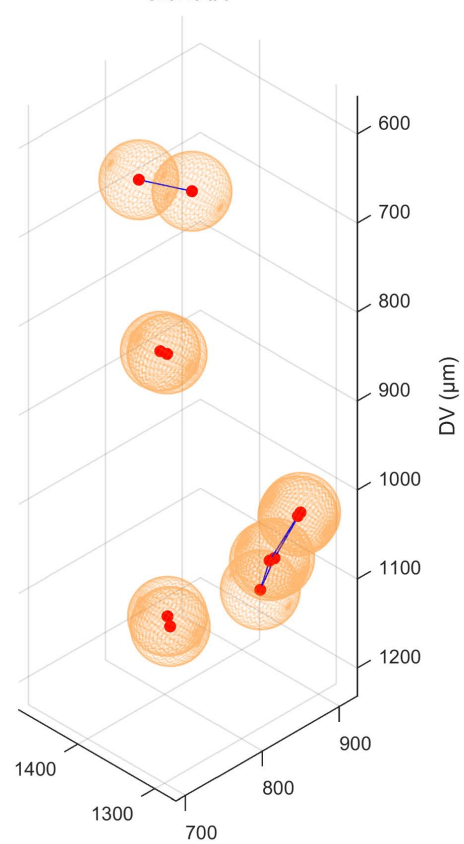

P21 Dataset #2

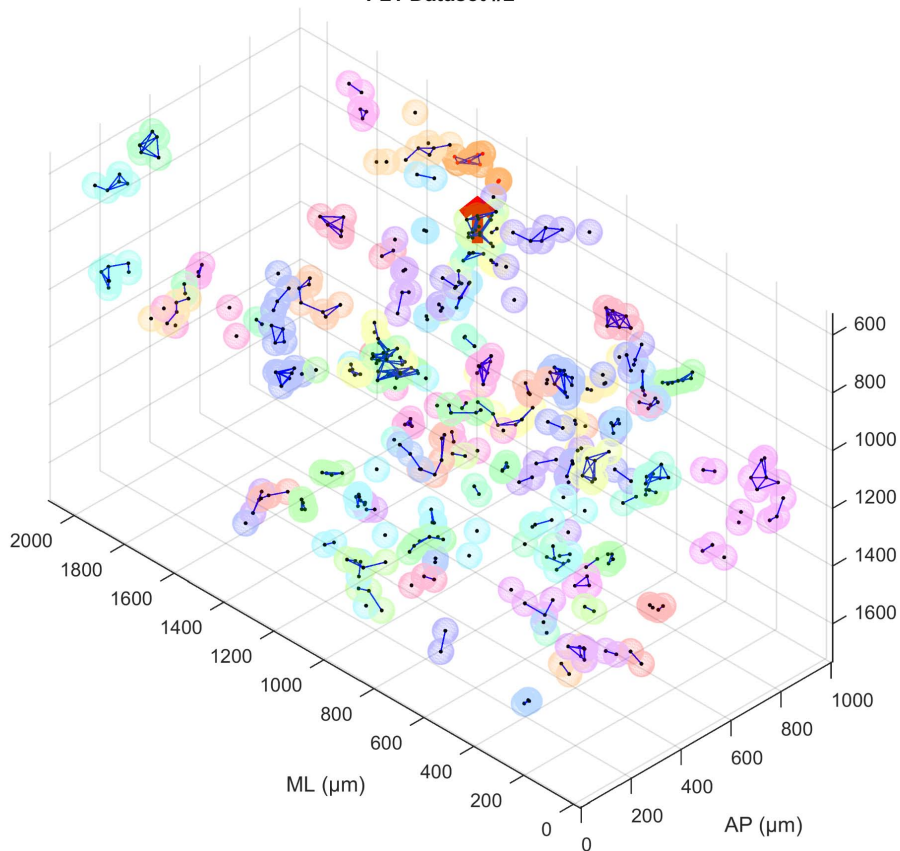

Clone #7

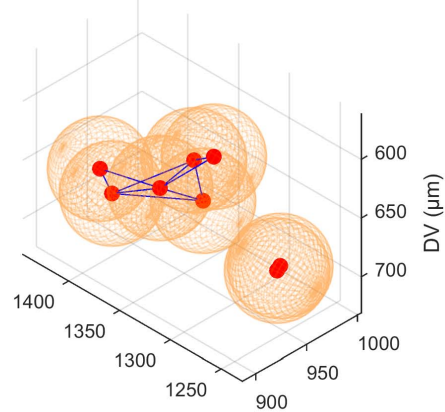

P21 Dataset #2

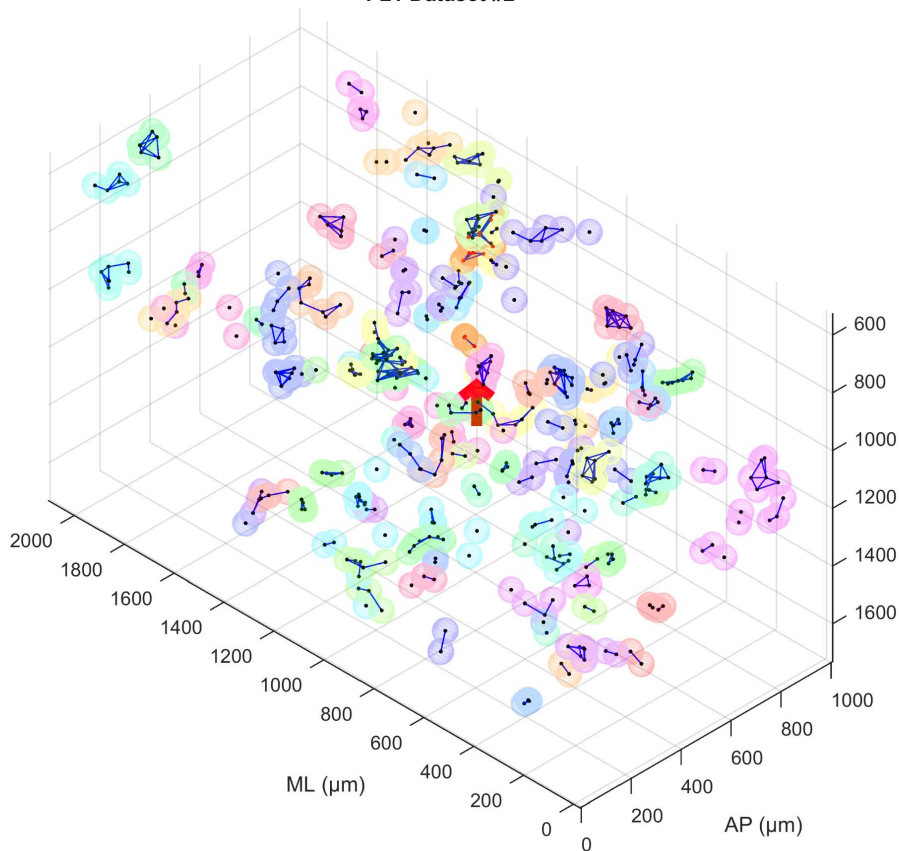

Clone #8

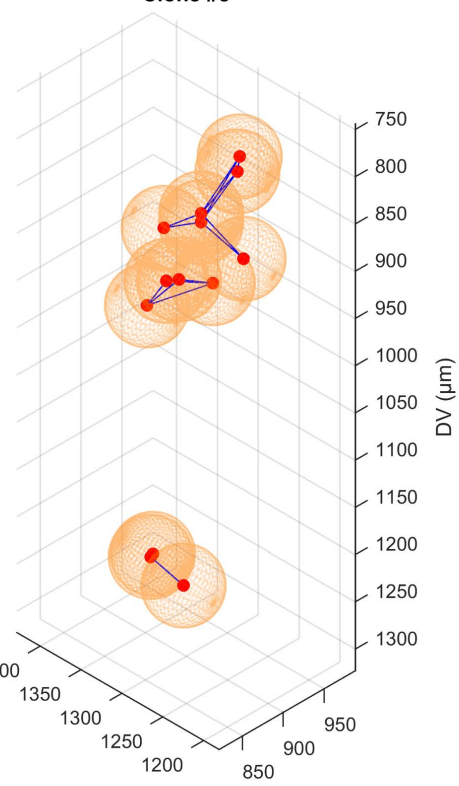

**P21 Dataset #2**

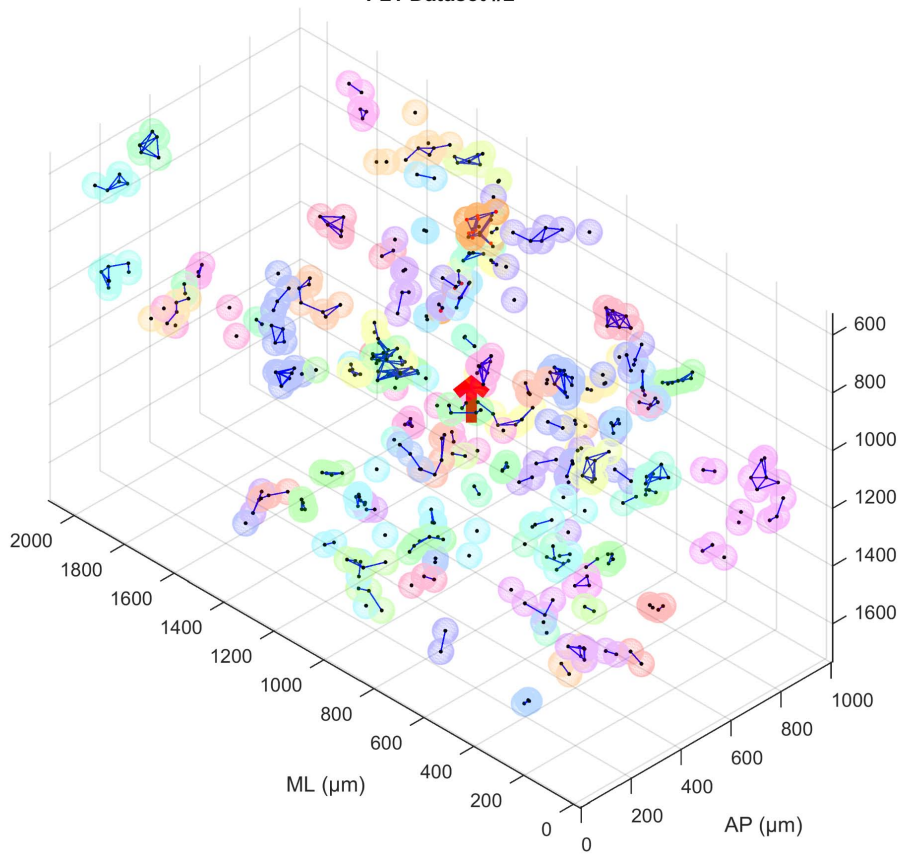

**Clone #9**

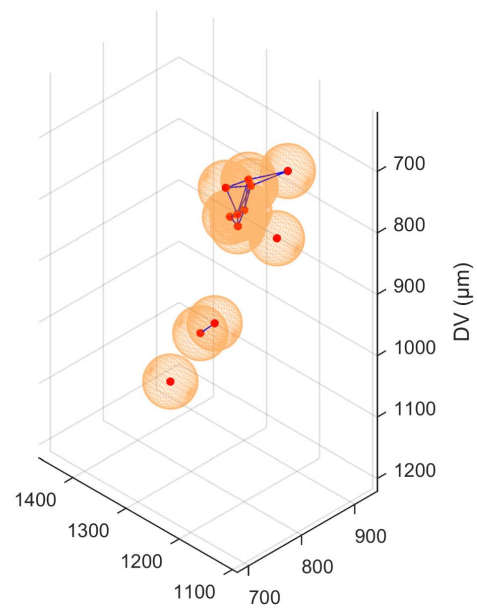

**P21 Dataset #2**

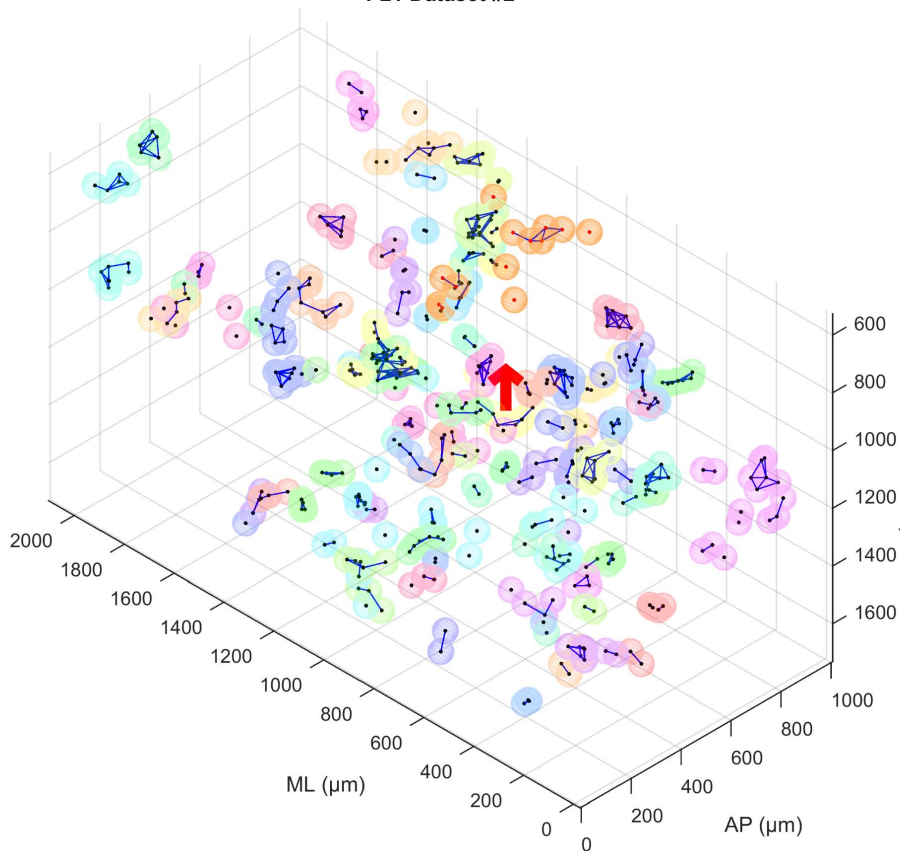

**Clone #10**

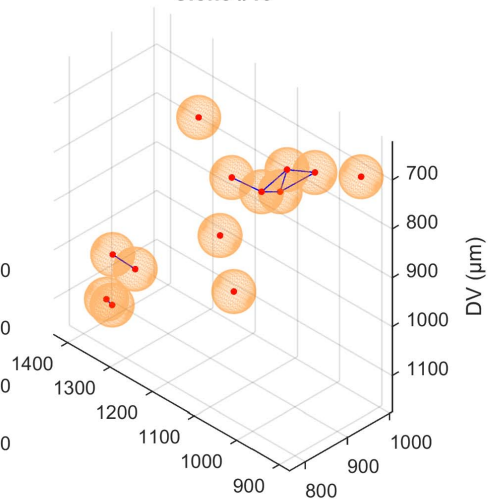



P21 Dataset #2

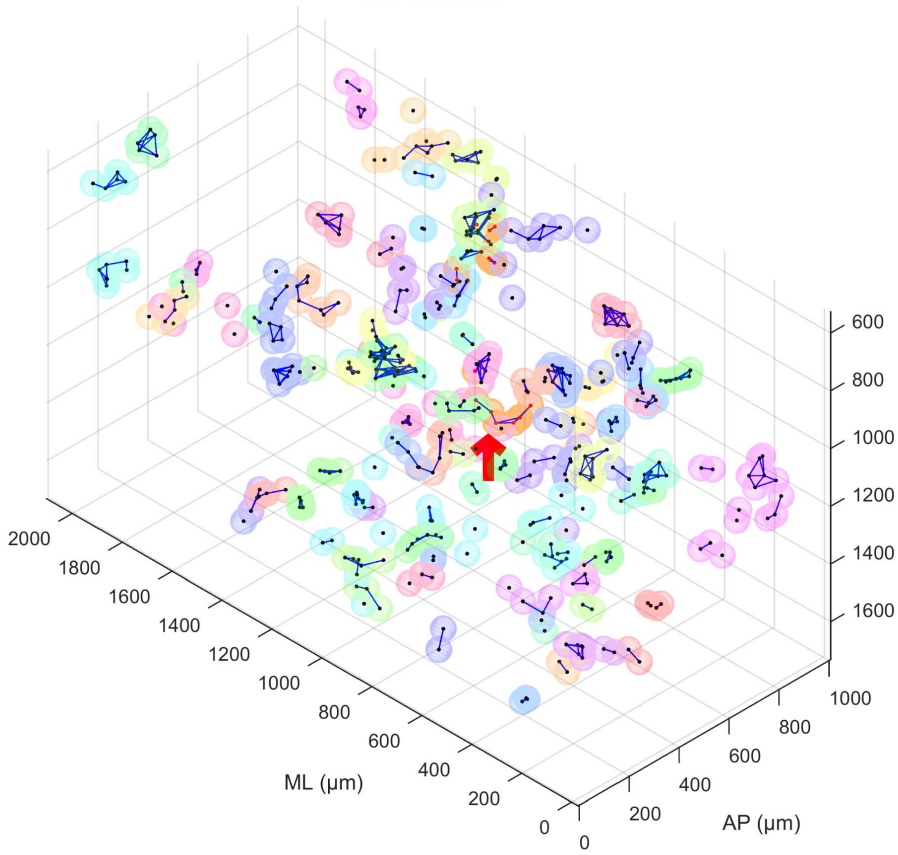

Clone #11

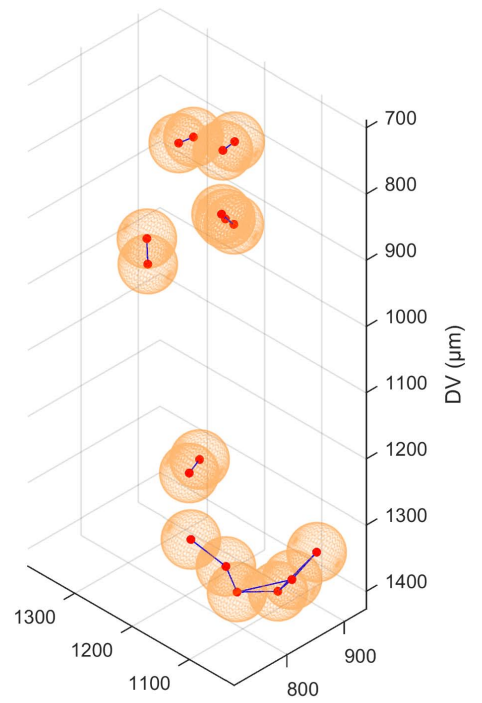

**P21 Dataset #2**

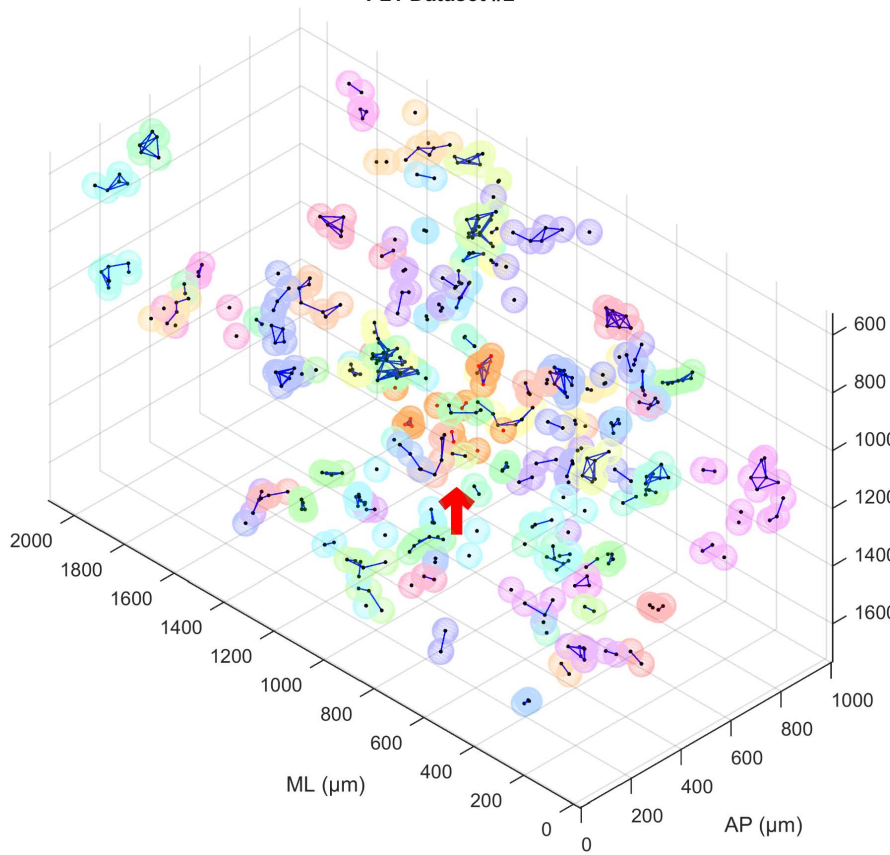

**Clone #12**

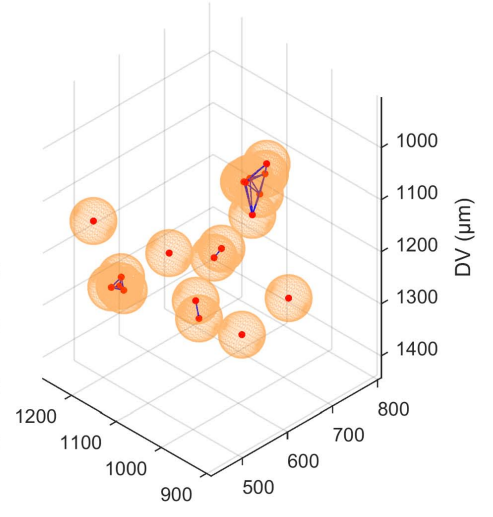

**P21 Dataset #2**

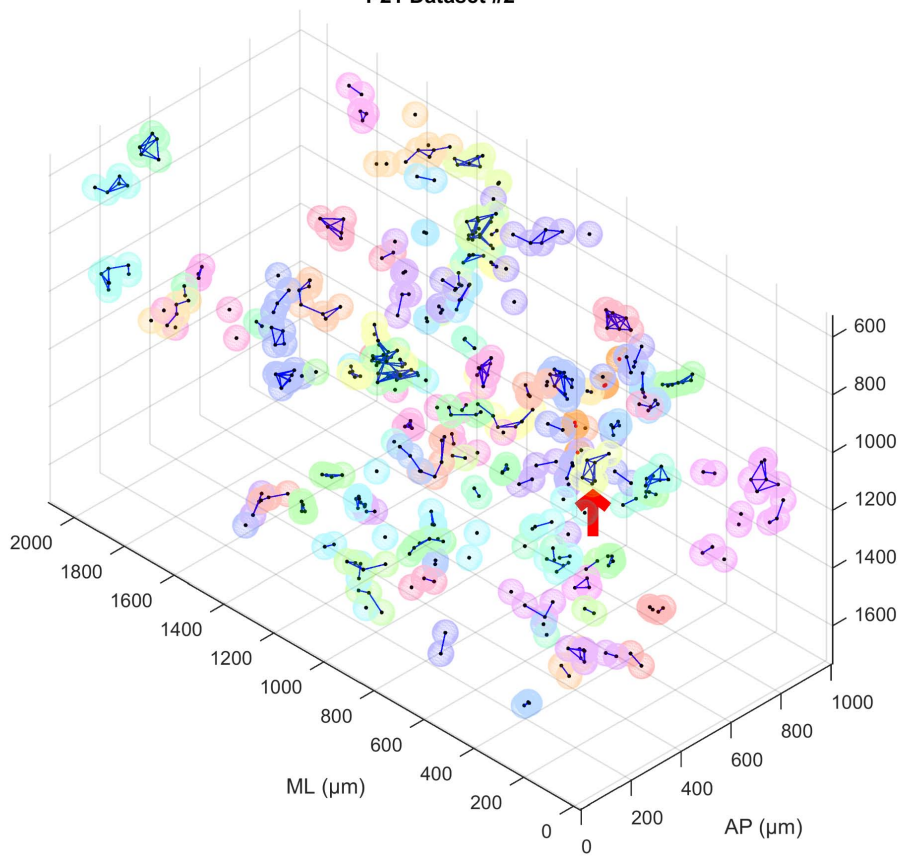

**Clone #13**

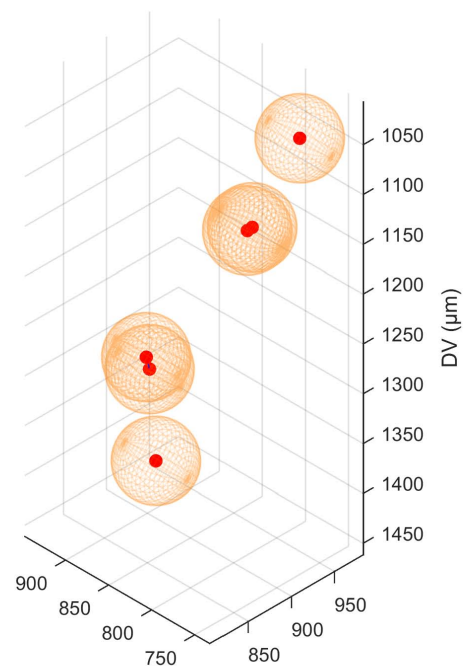

P21 Dataset #2

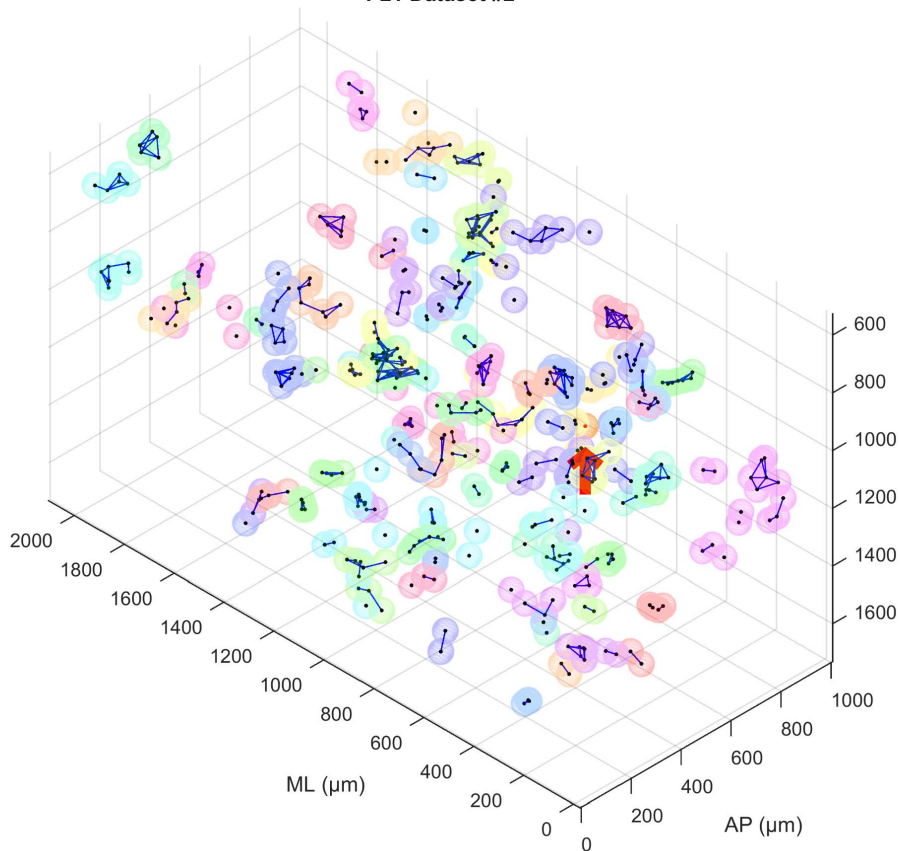

Clone #14

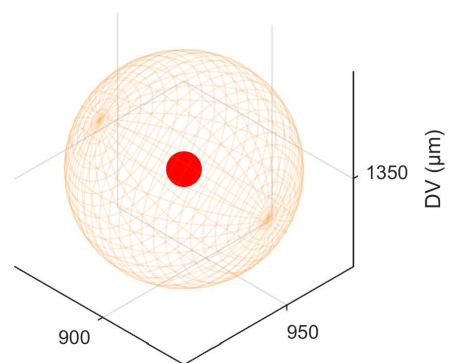

**P21 Dataset #2**

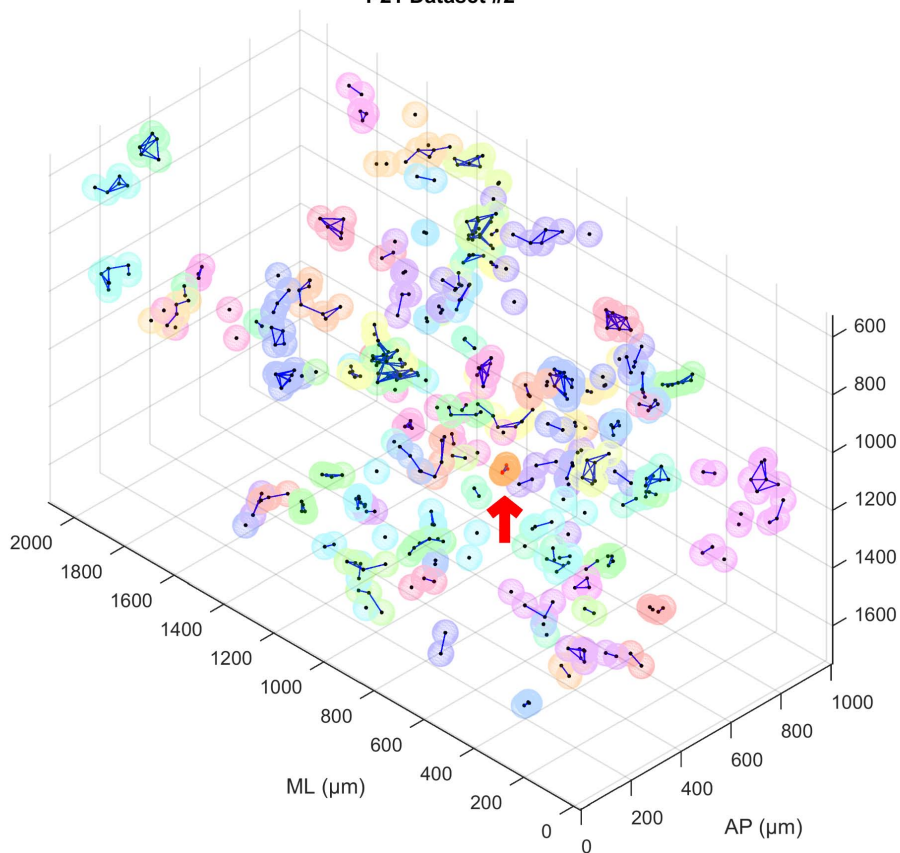

**Clone #15**

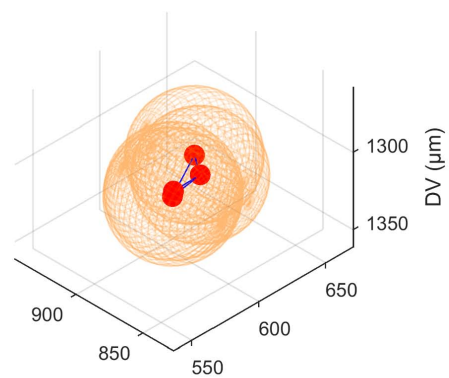

P21 Dataset #2

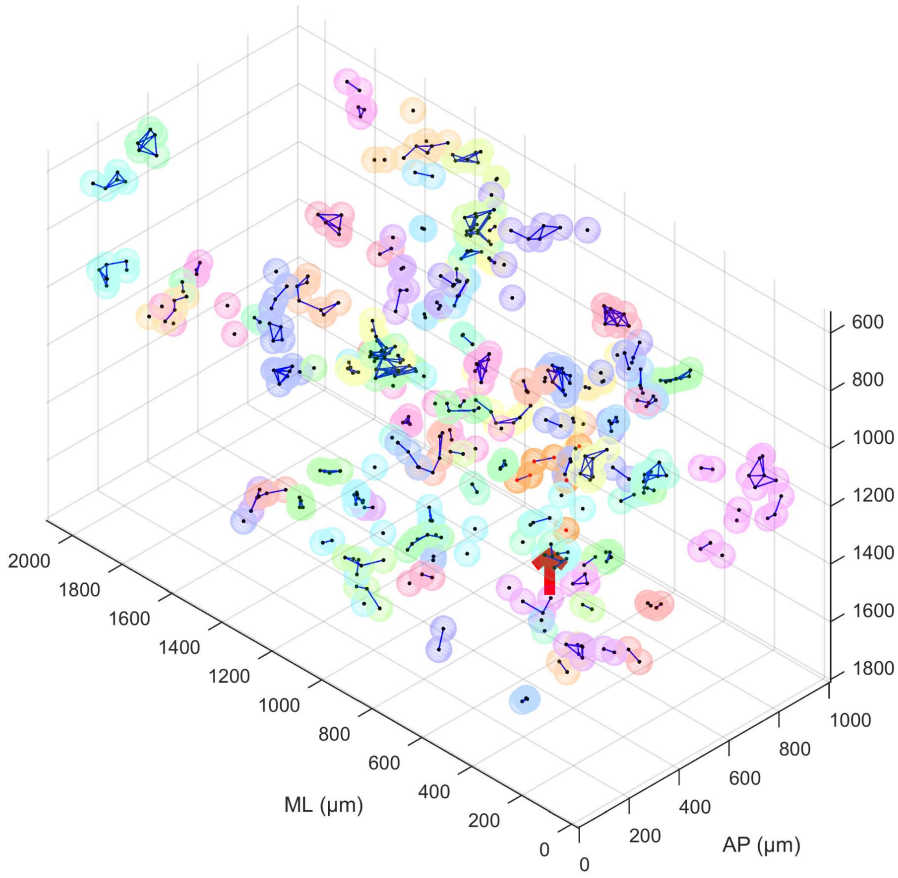

Clone #16

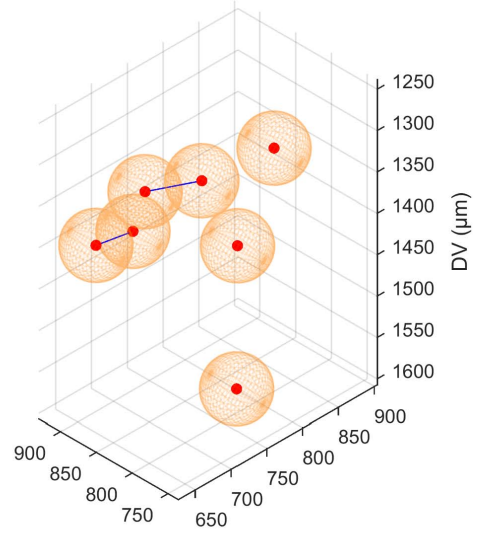

**P21 Dataset #2**

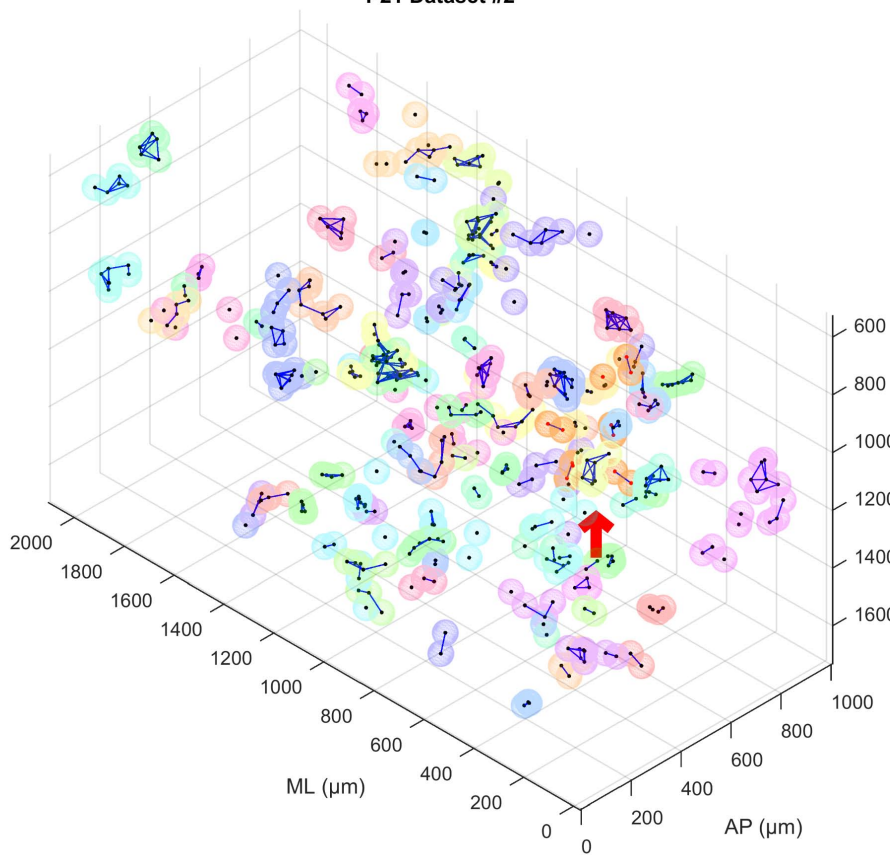

**Clone #17**

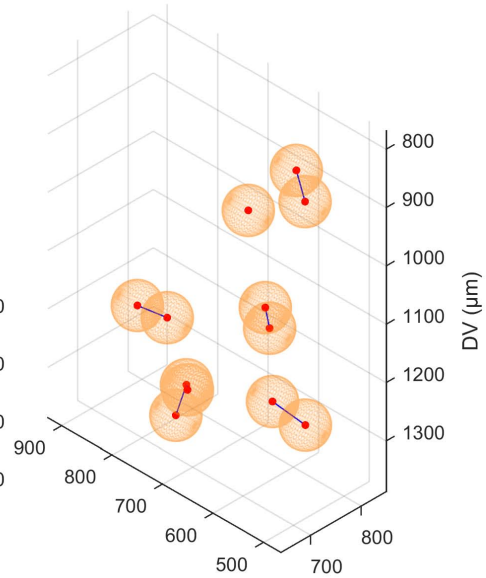

**P21 Dataset #2**

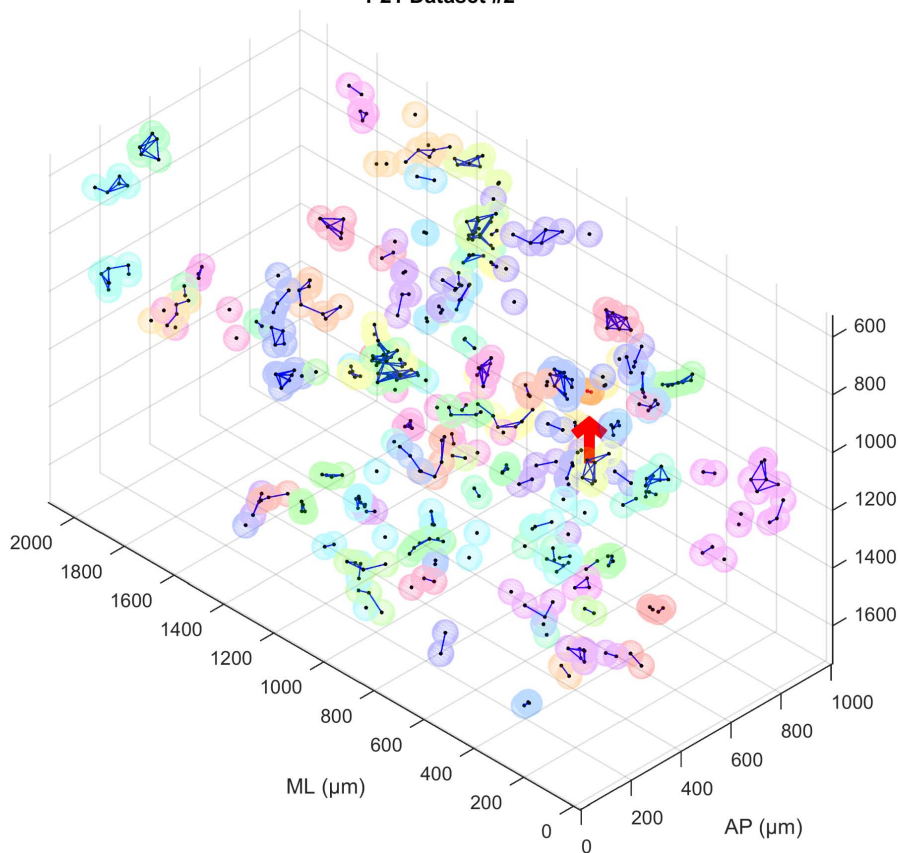

**Clone #18**

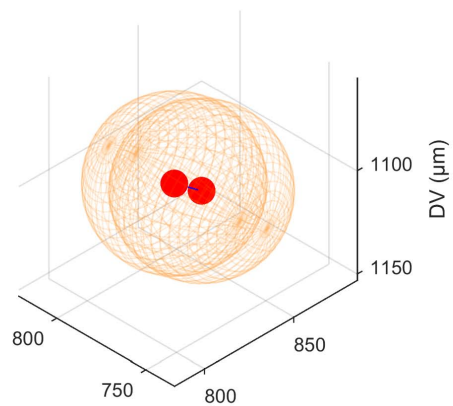



**P21 Dataset #2**

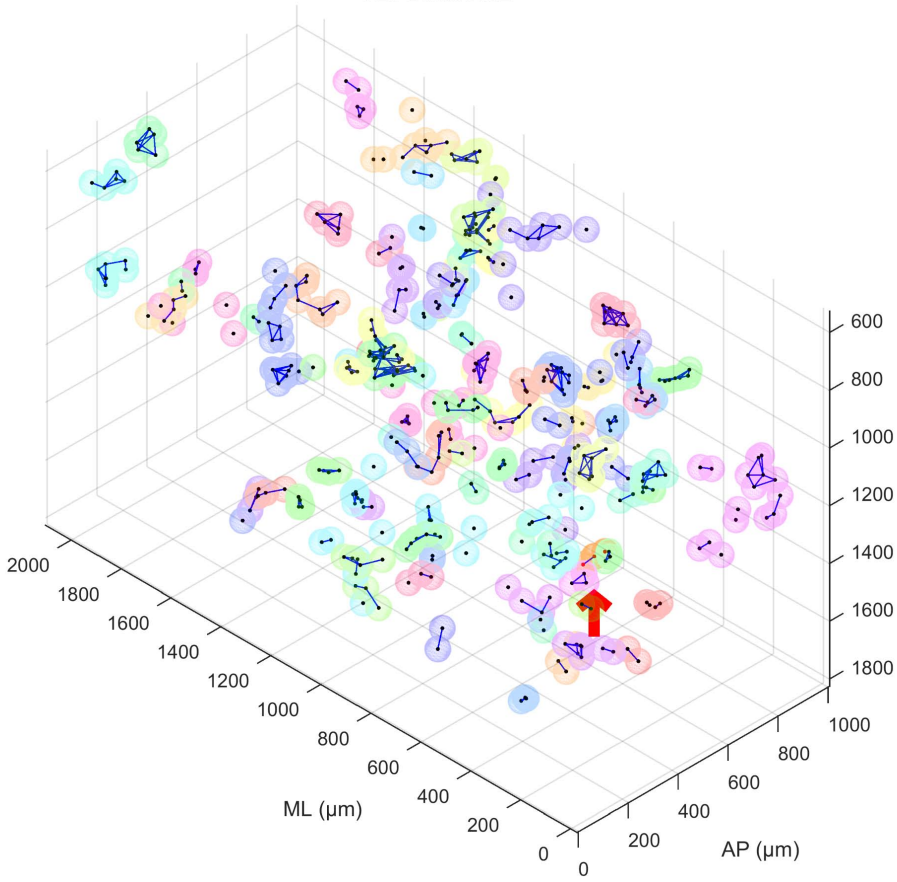

**Clone #19**

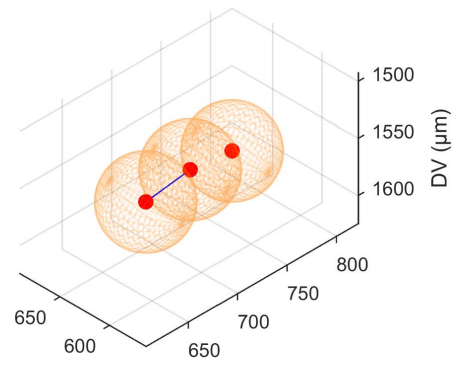

**P21 Dataset #2**

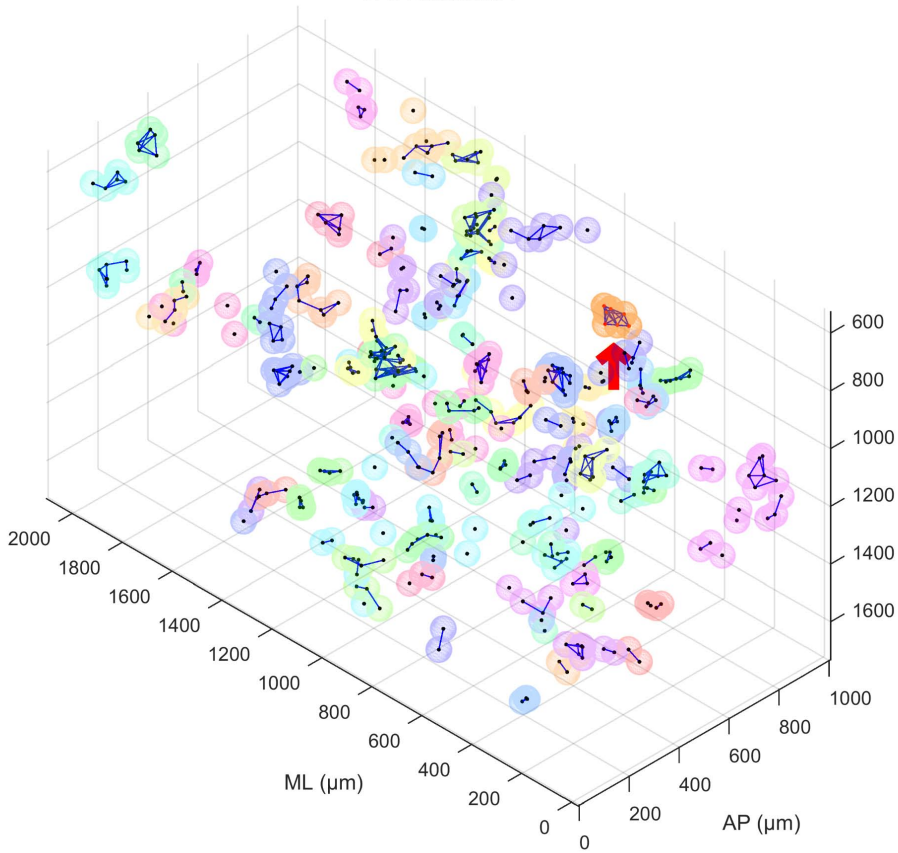

**Clone #20**

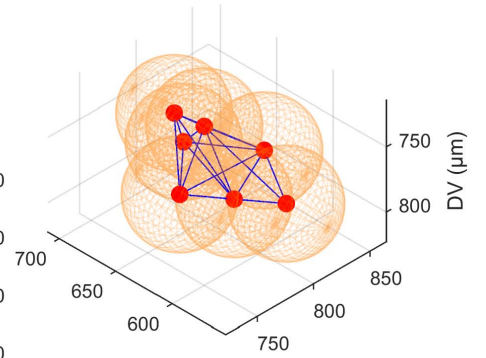

**P21 Dataset #2**

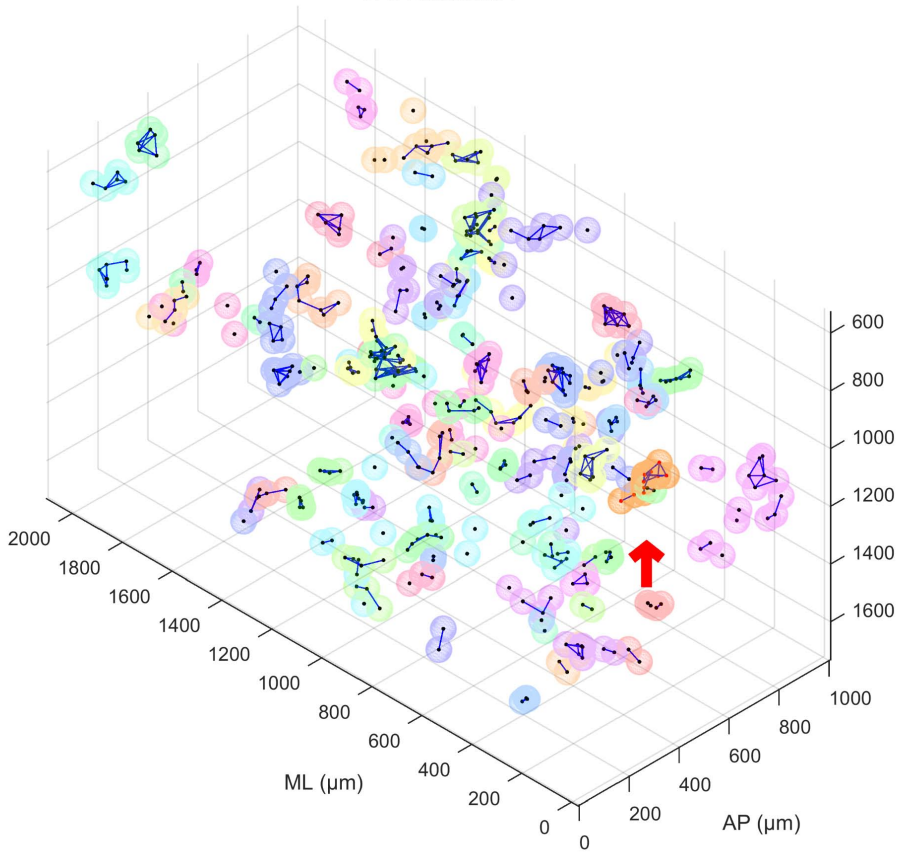

**Clone #21**

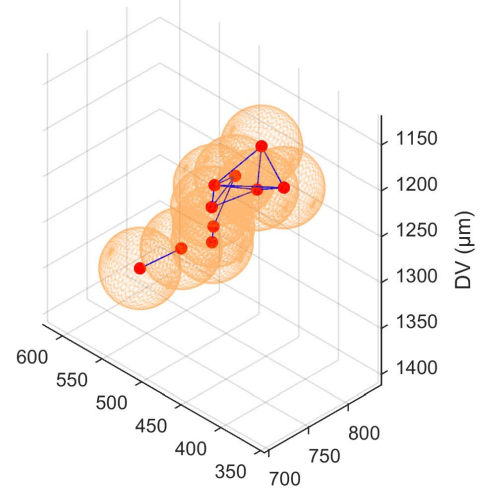

**P21 Dataset #2**

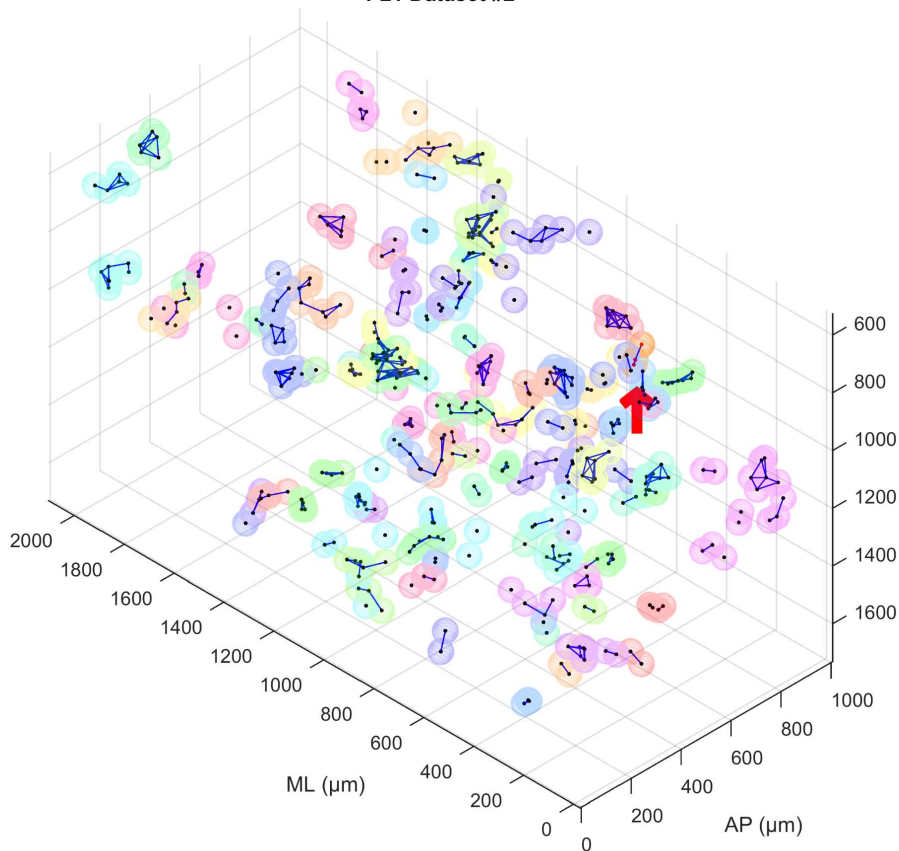

**Clone #22**

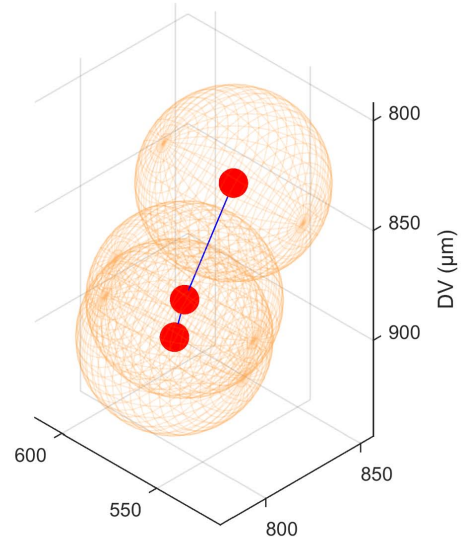

**P21 Dataset #2**

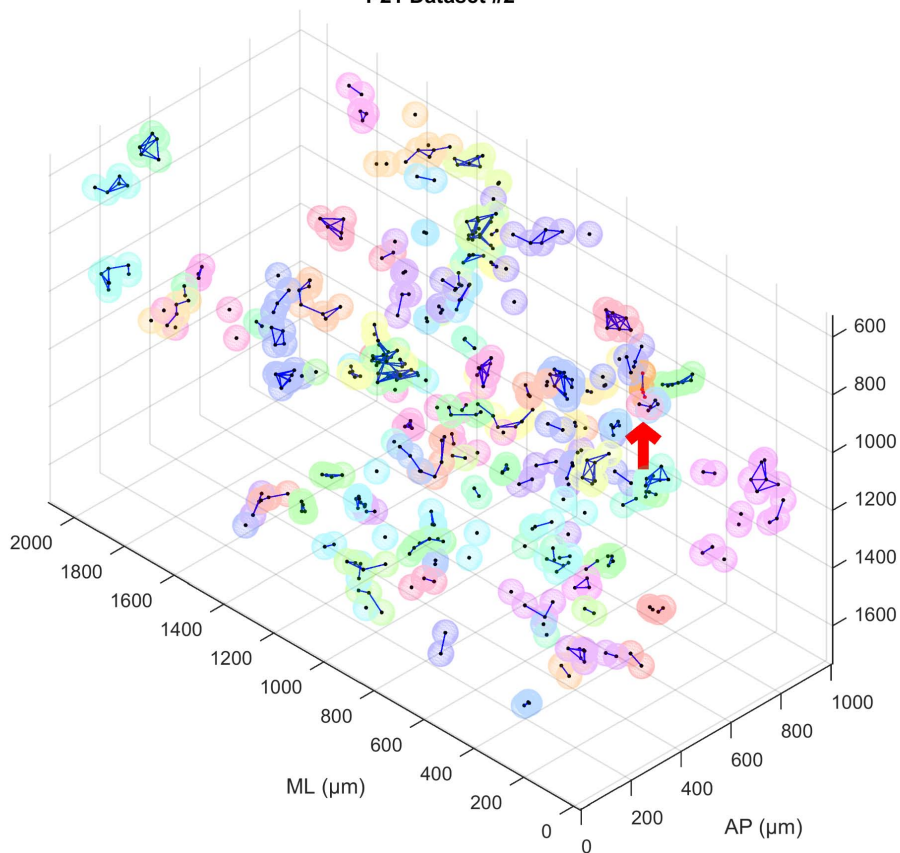

**Clone #23**

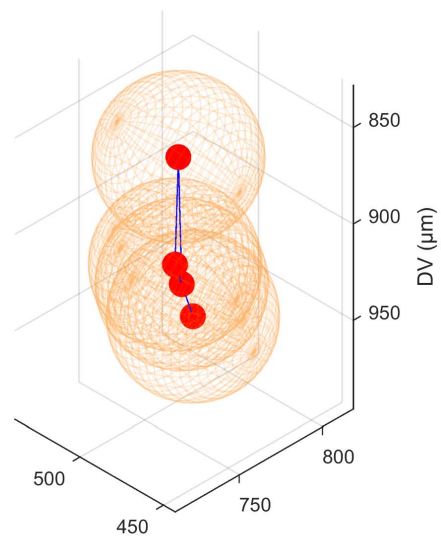

P21 Dataset #2

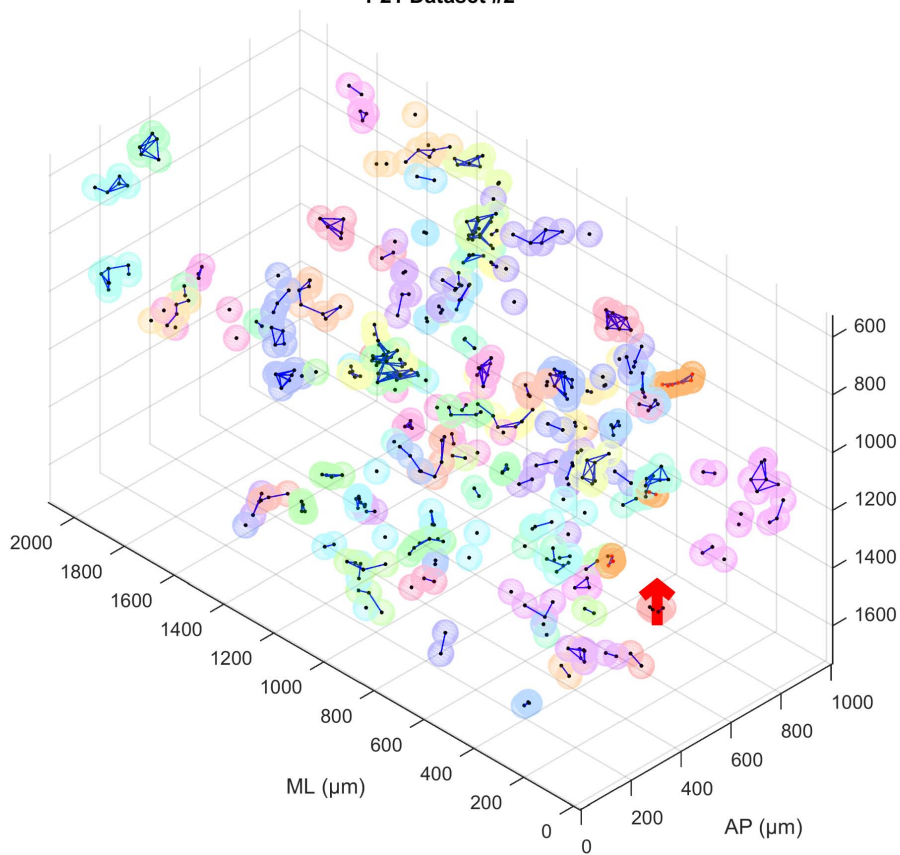

Clone #24

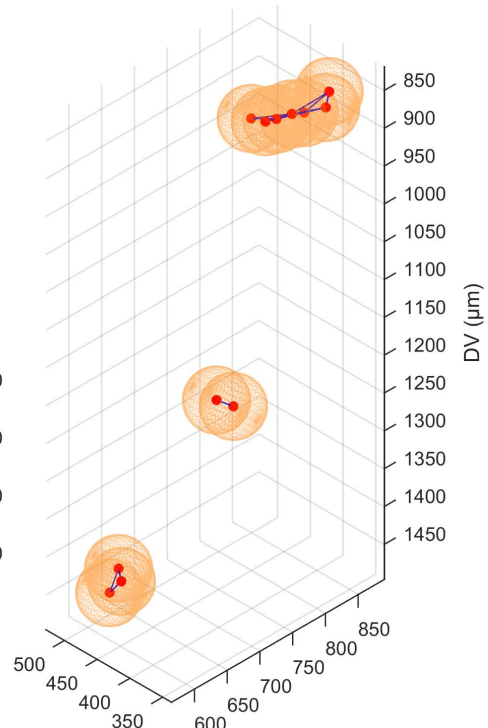

P21 Dataset #2

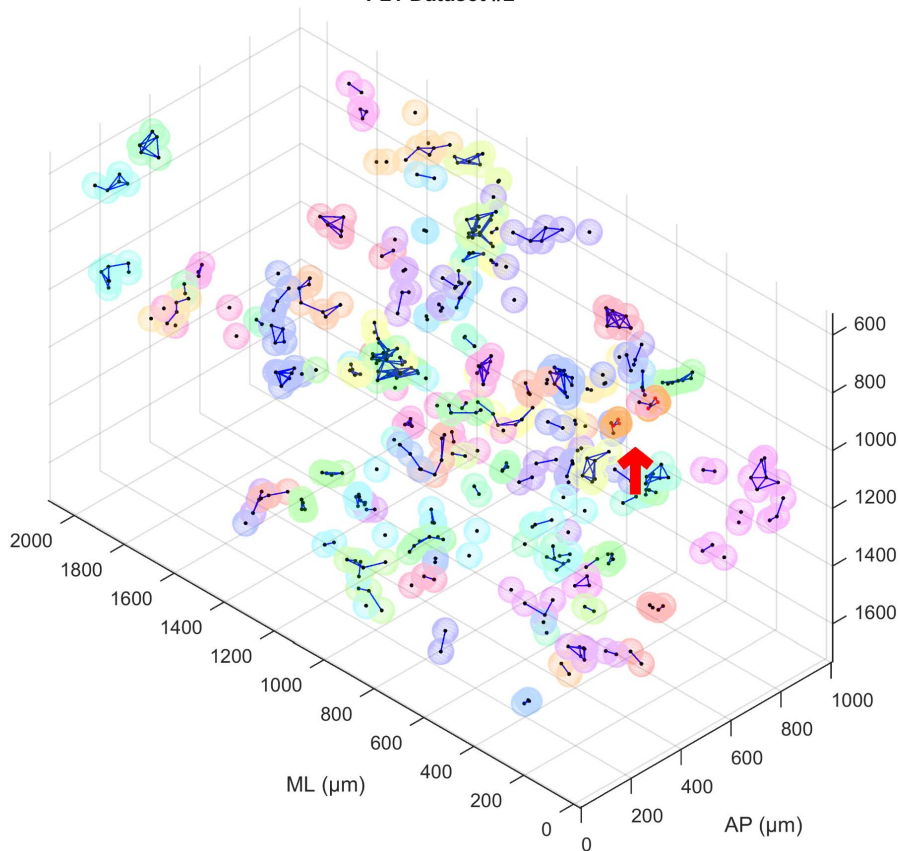

Clone #25

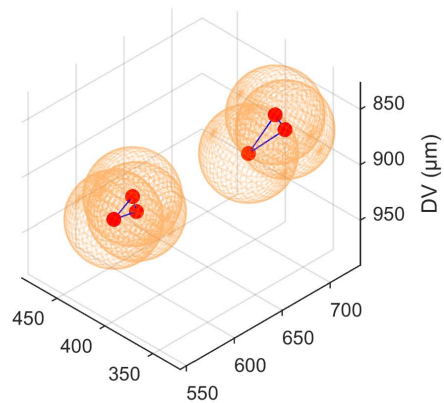

**P21 Dataset #2**

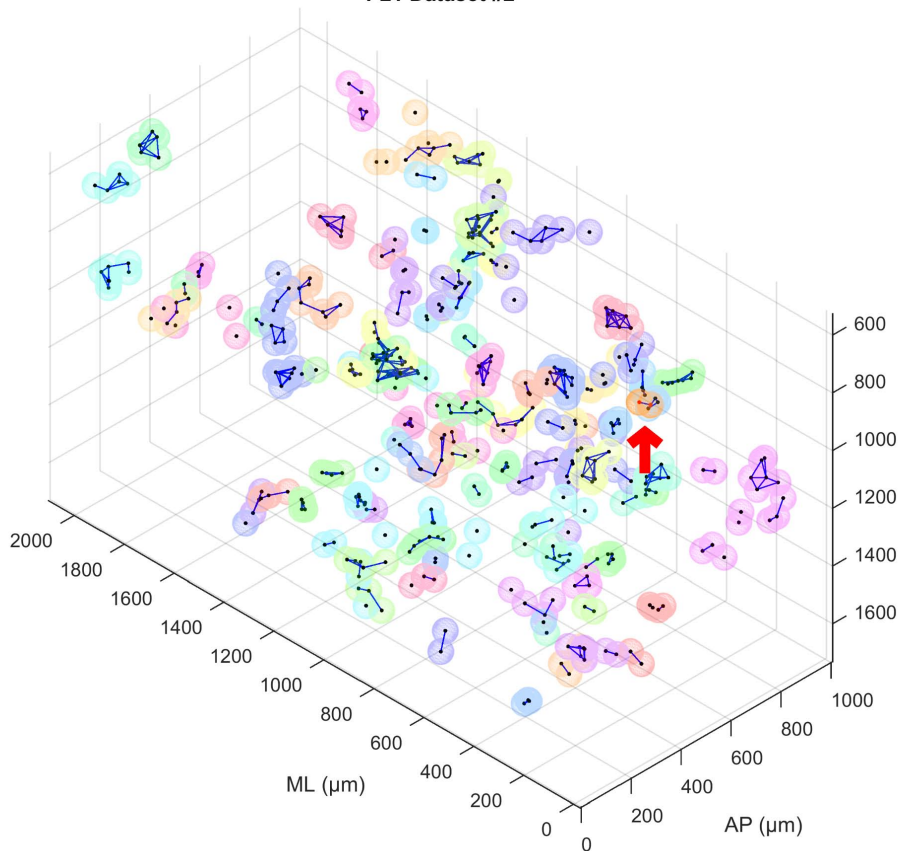

**Clone #26**

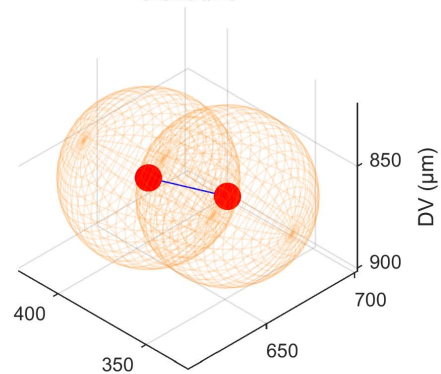



P21 Dataset #2

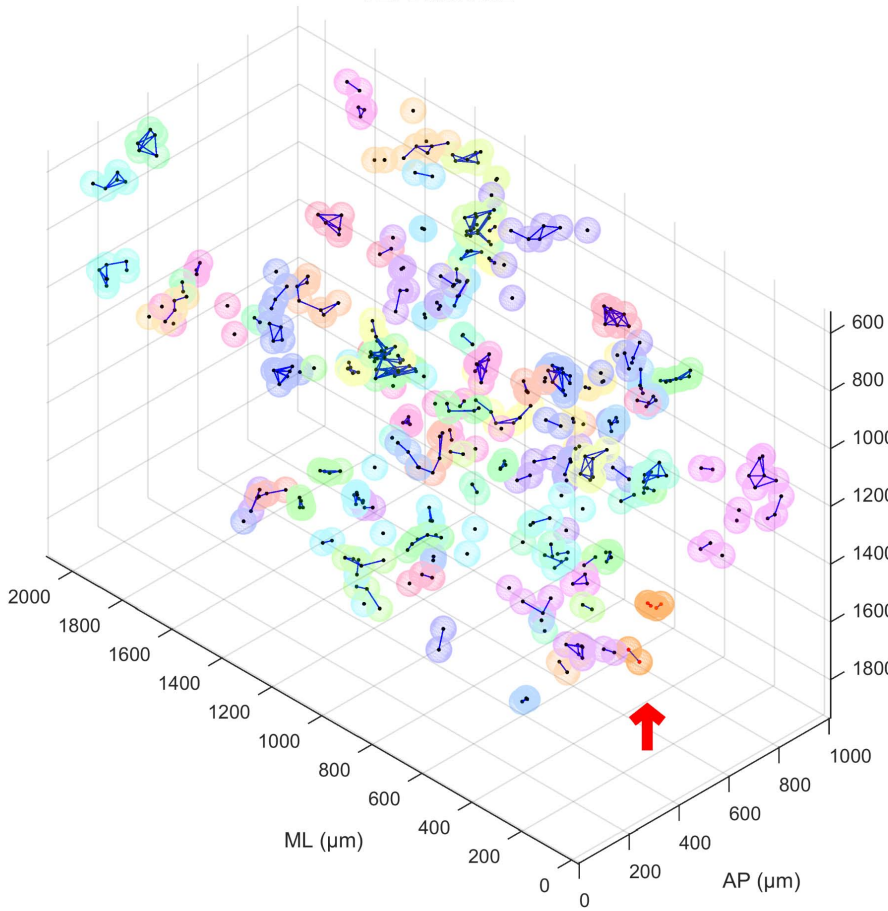

Clone #27

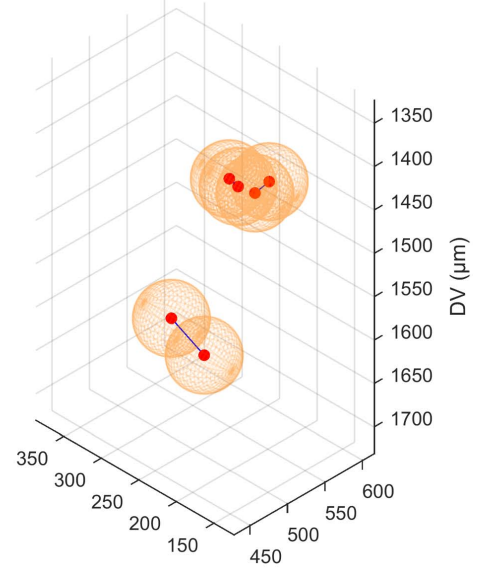

P21 Dataset #2

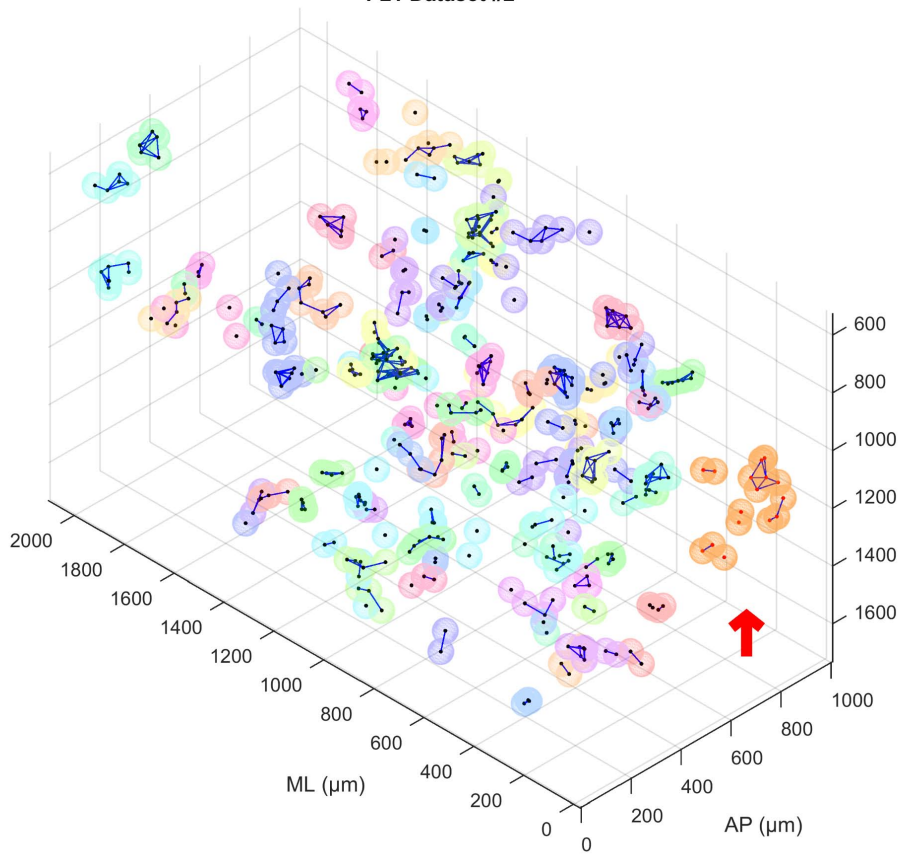

Clone #28

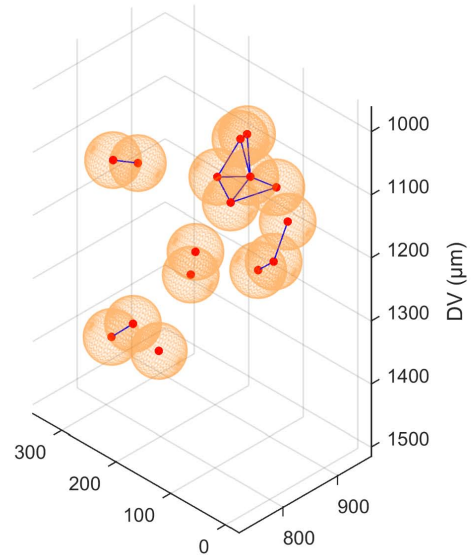

**P21 Dataset #2**

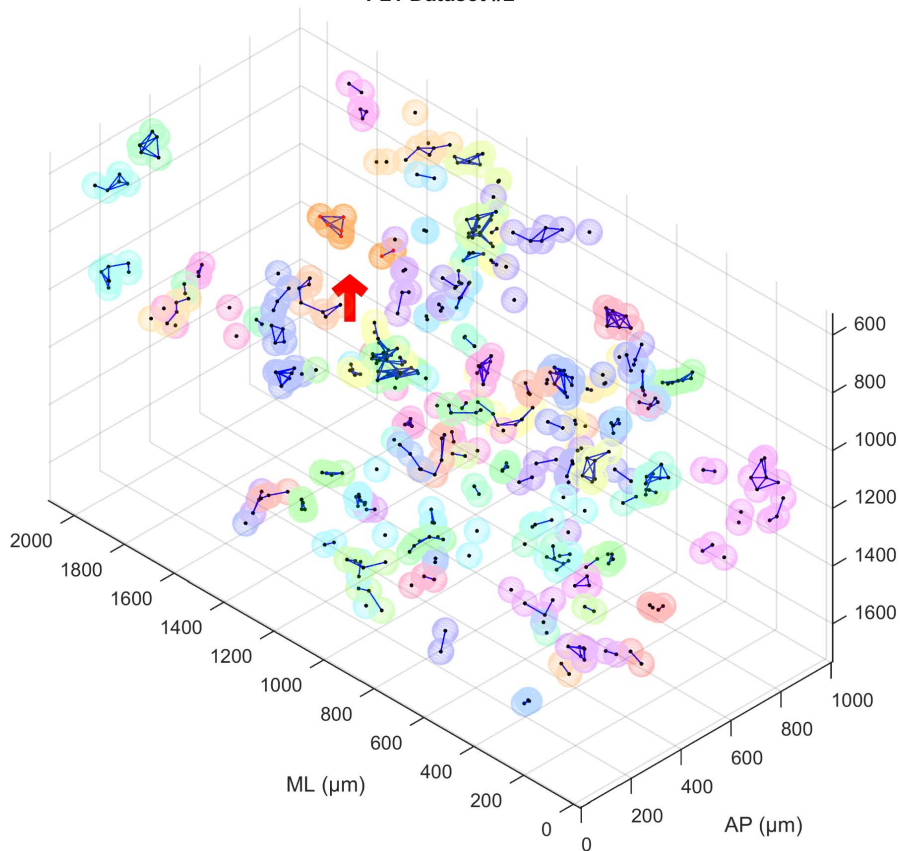

**Clone #29**

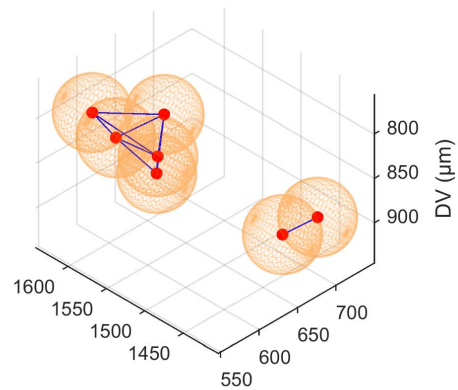

P21 Dataset #2

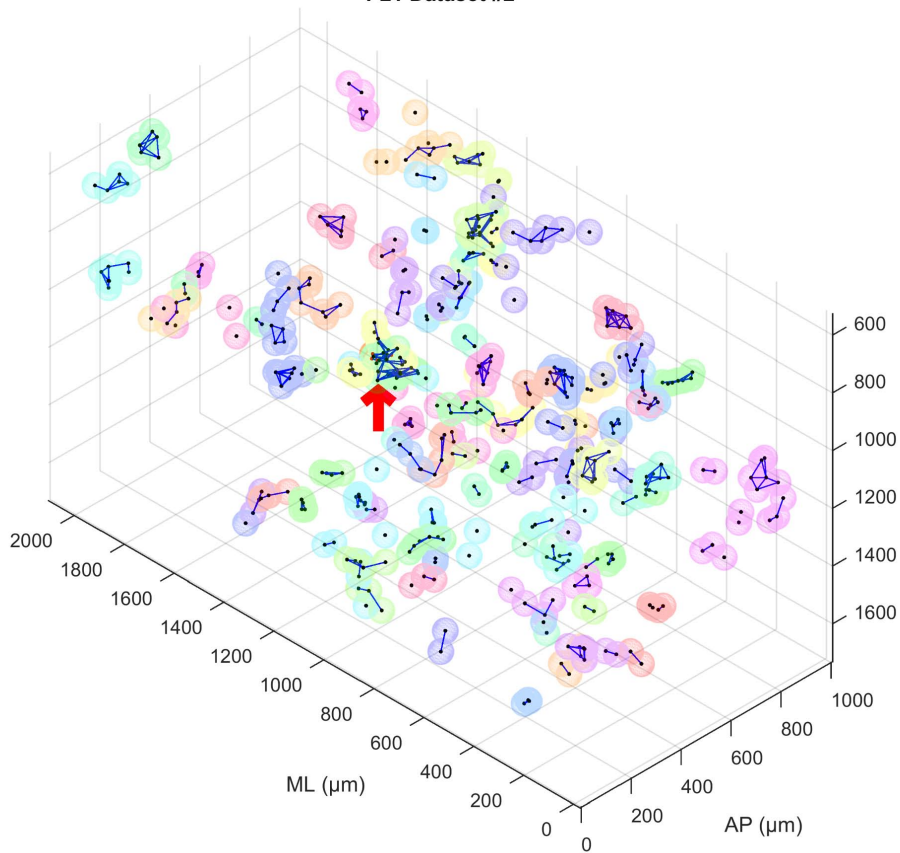

Clone #30

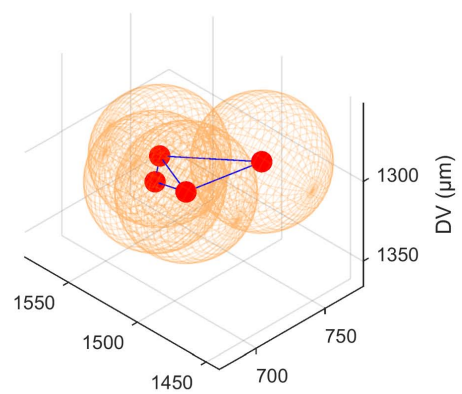

**P21 Dataset #2**

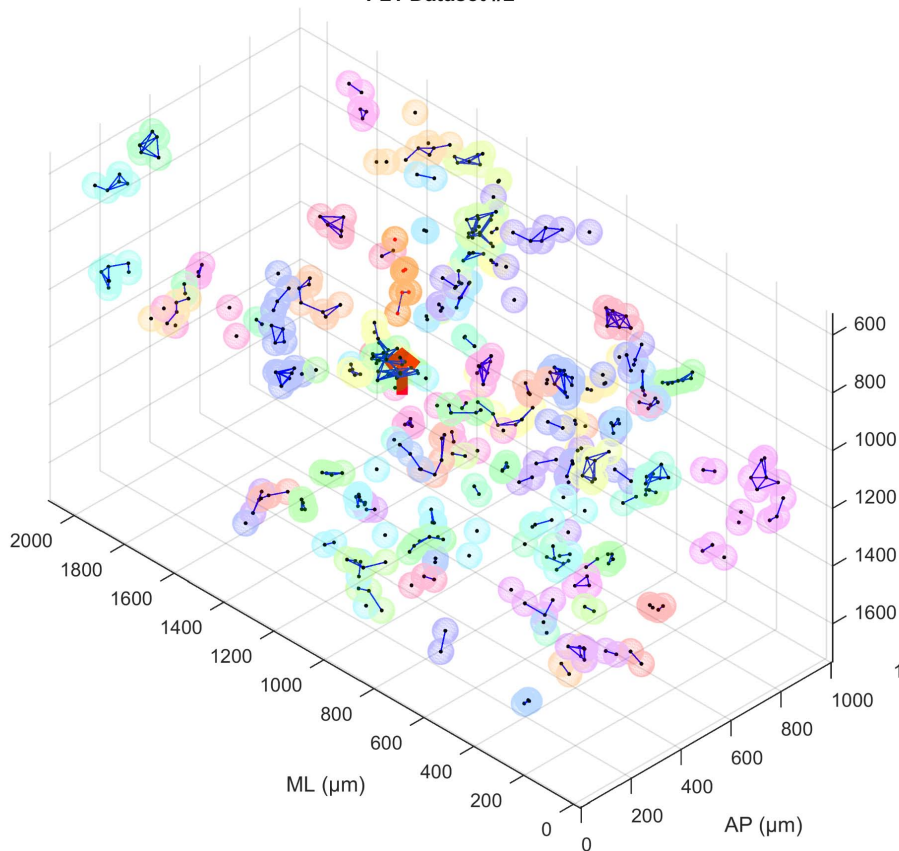

**Clone #31**

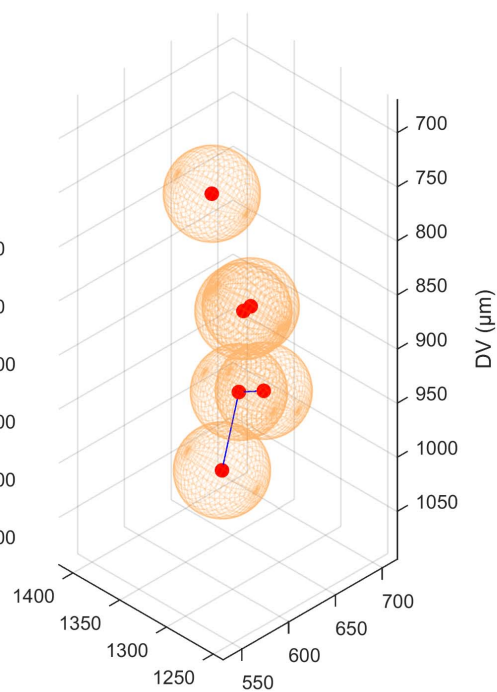

**P21 Dataset #2**

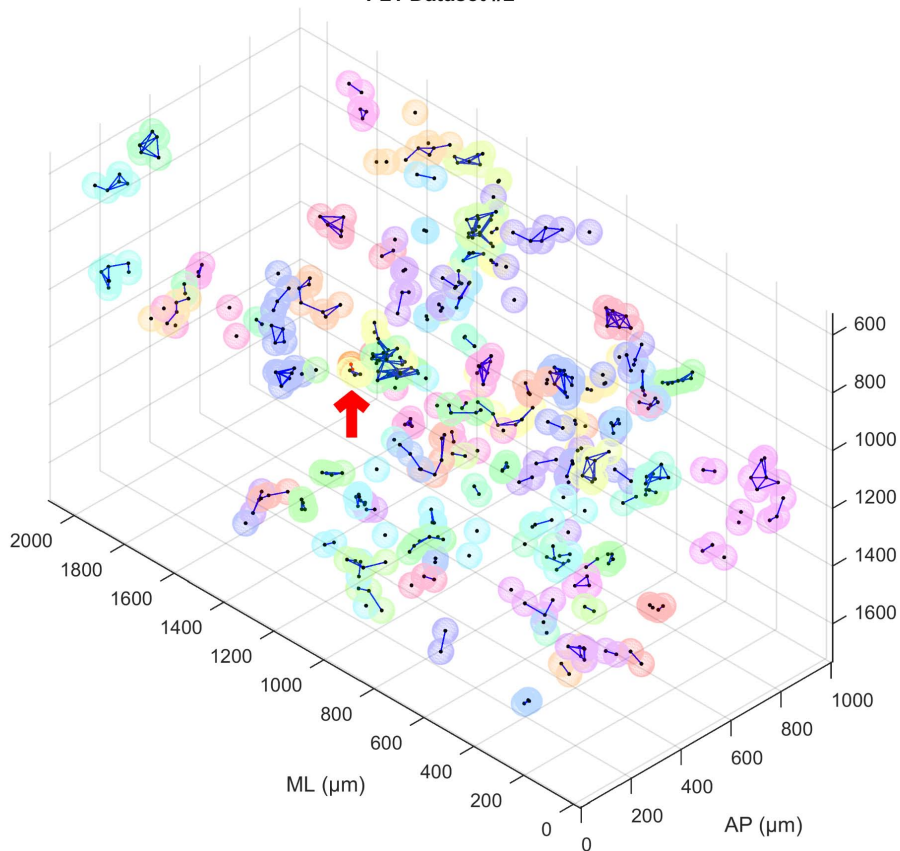

**Clone #32**

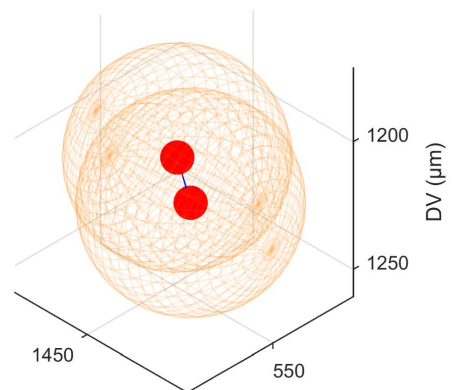

P21 Dataset #2

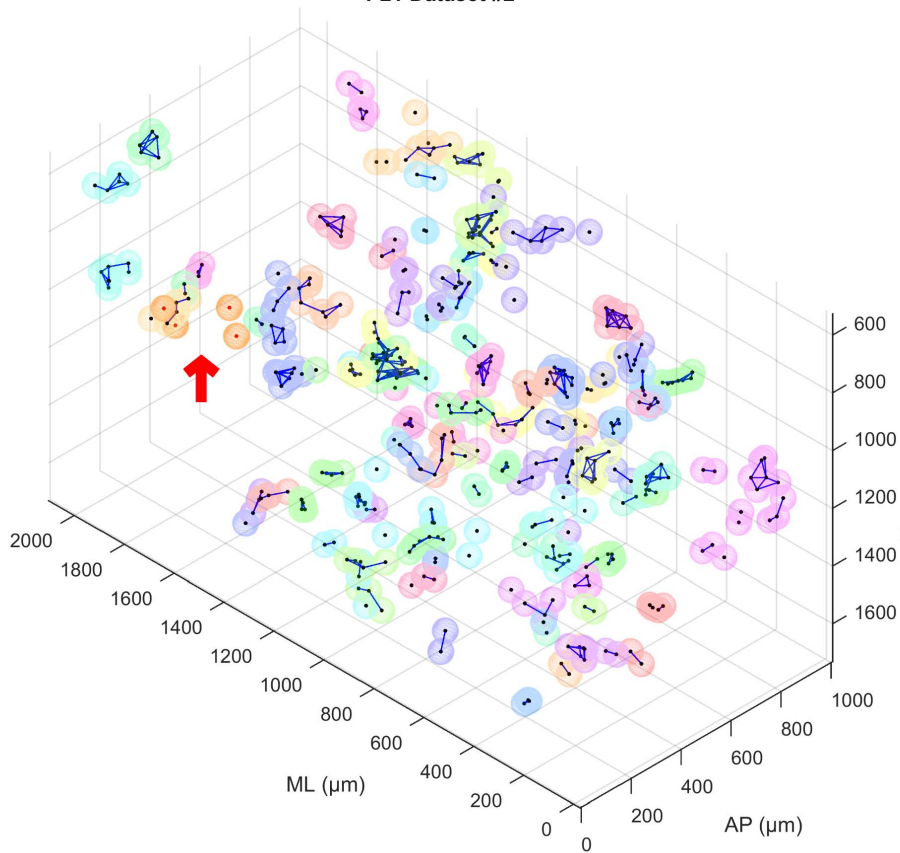

Clone #33

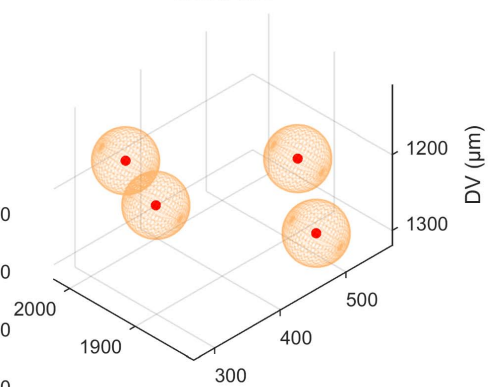

**P21 Dataset #2**

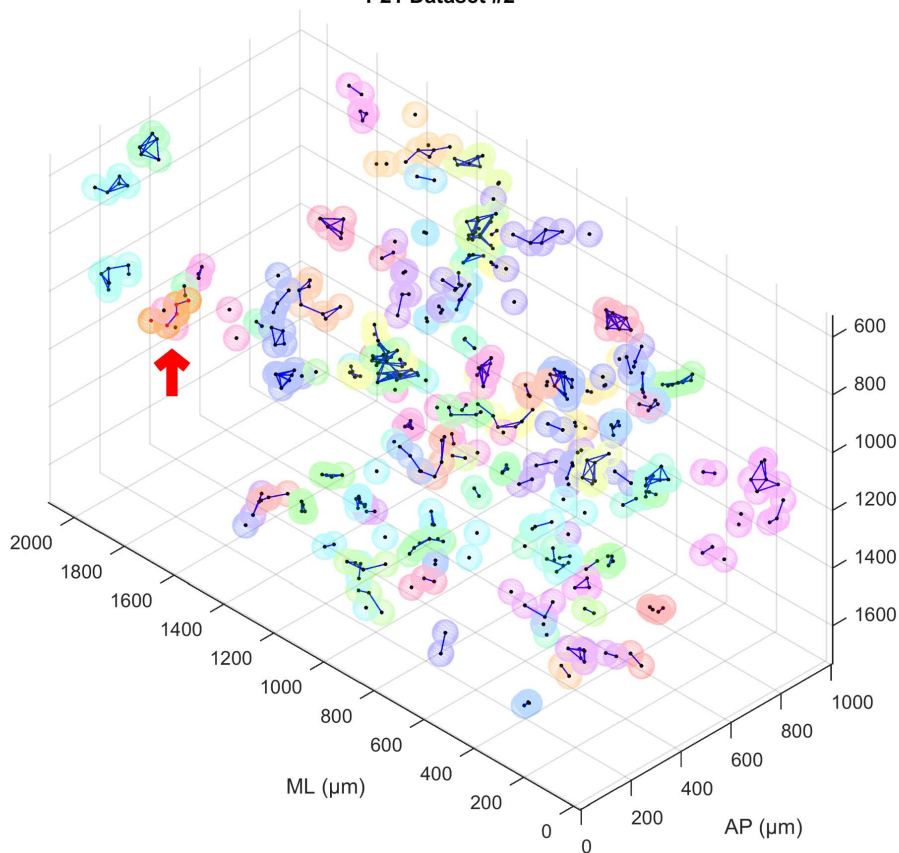

**Clone #34**

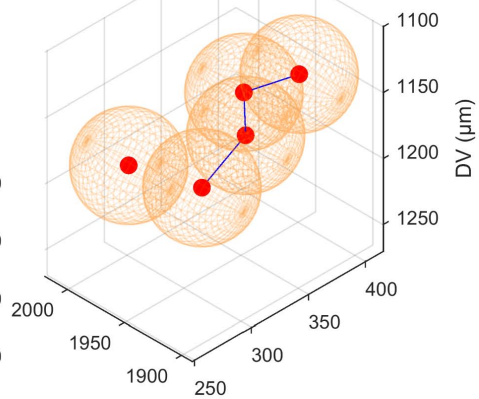



**P21 Dataset #2**

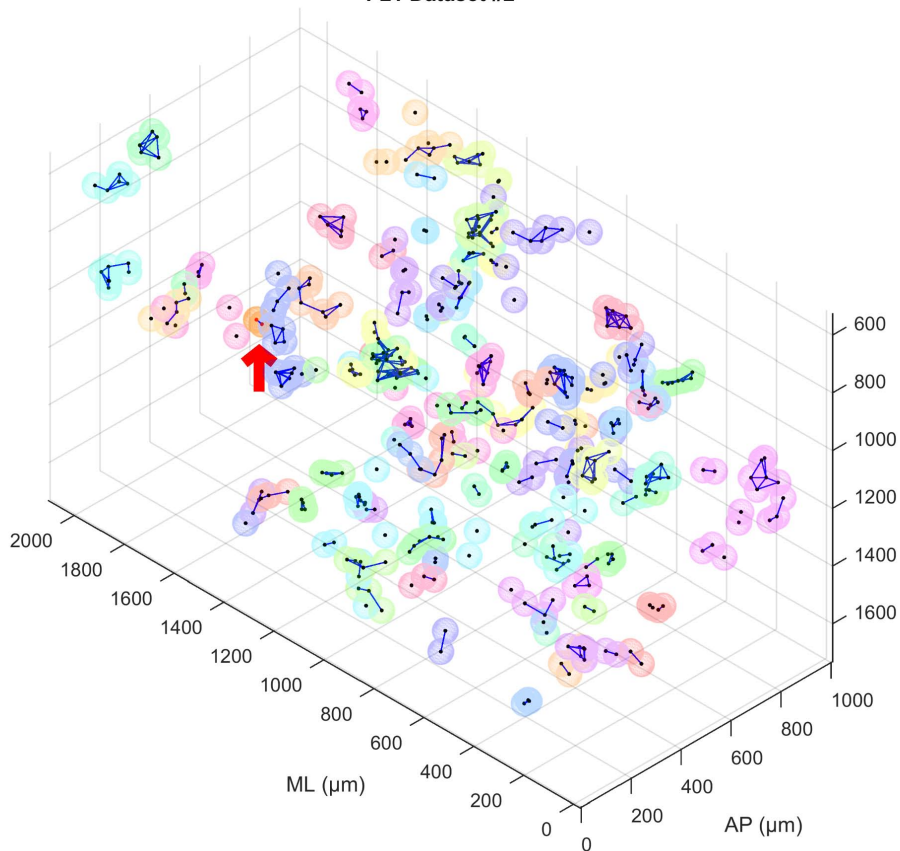

**Clone #35**

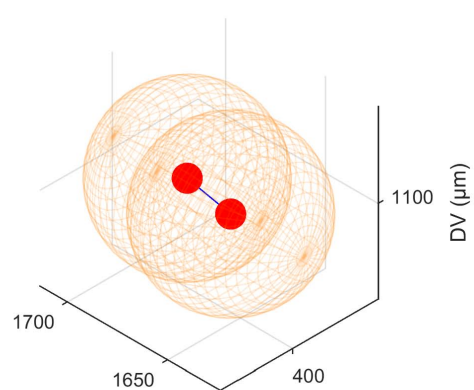

**P21 Dataset #2**

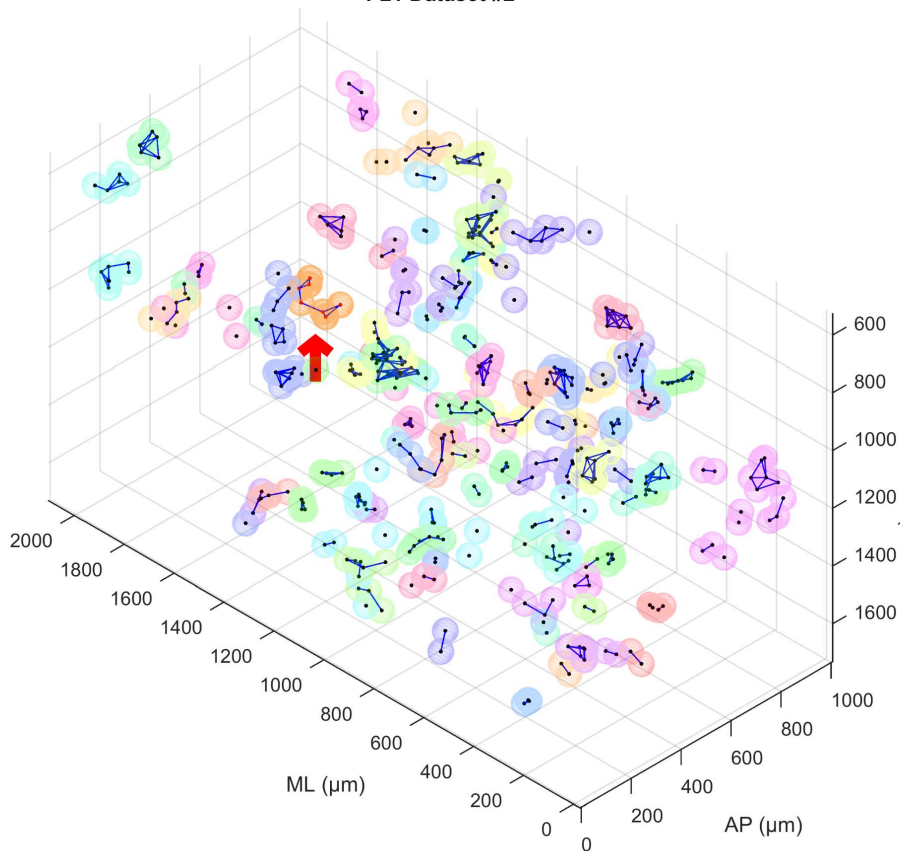

**Clone #36**

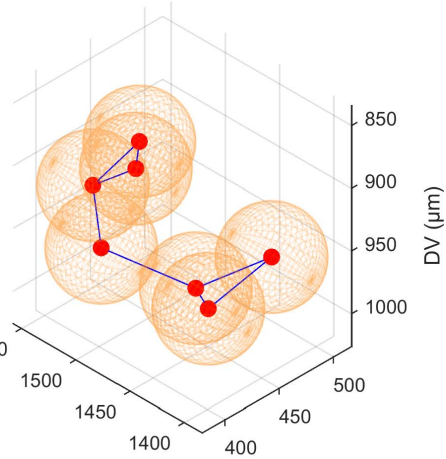

**P21 Dataset #2**

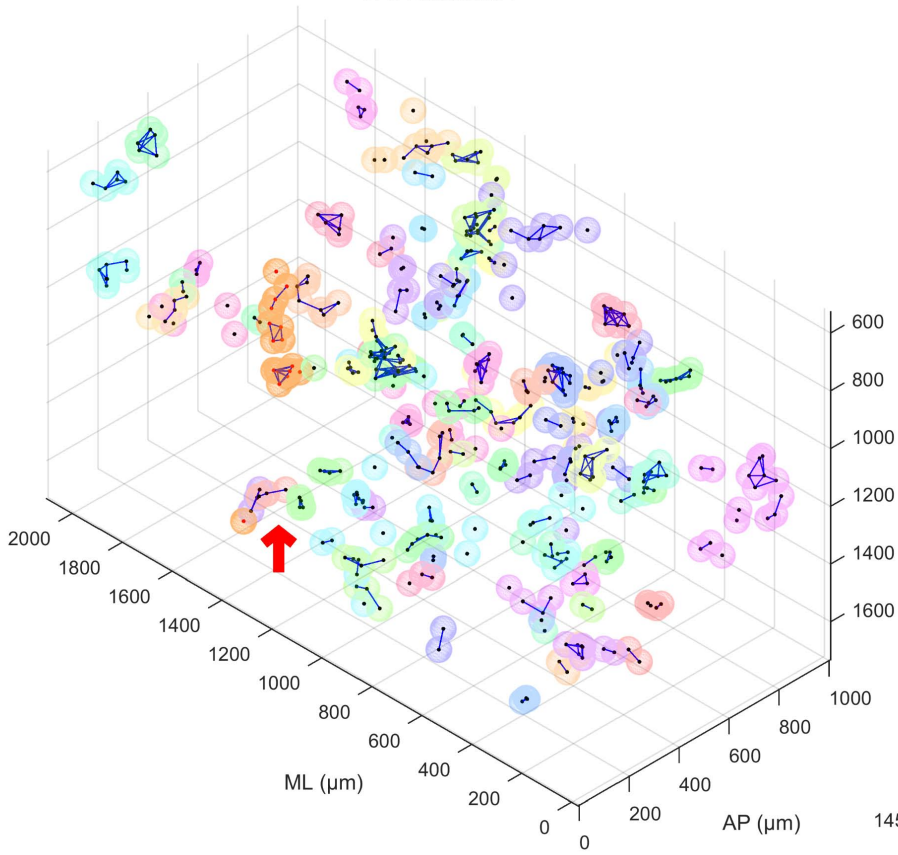

**Clone #37**

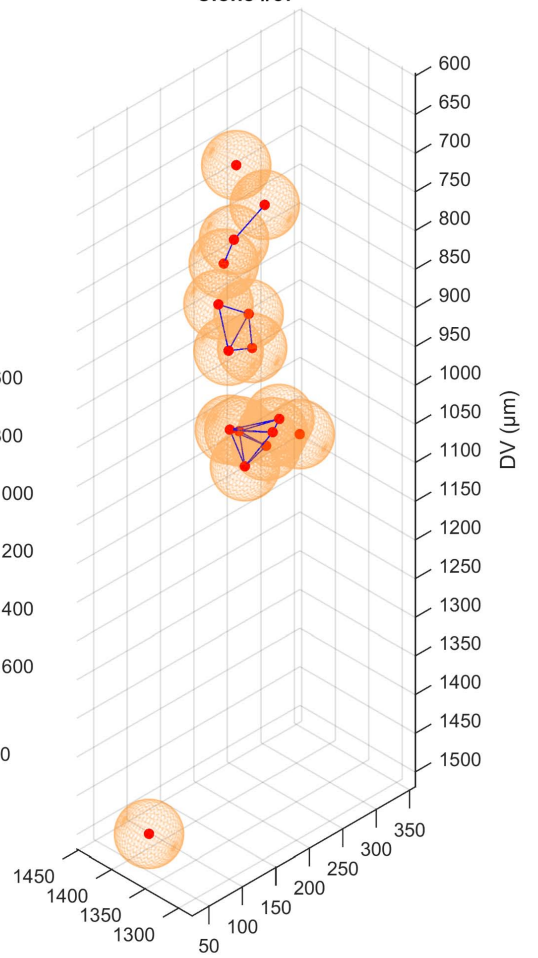

P21 Dataset #2

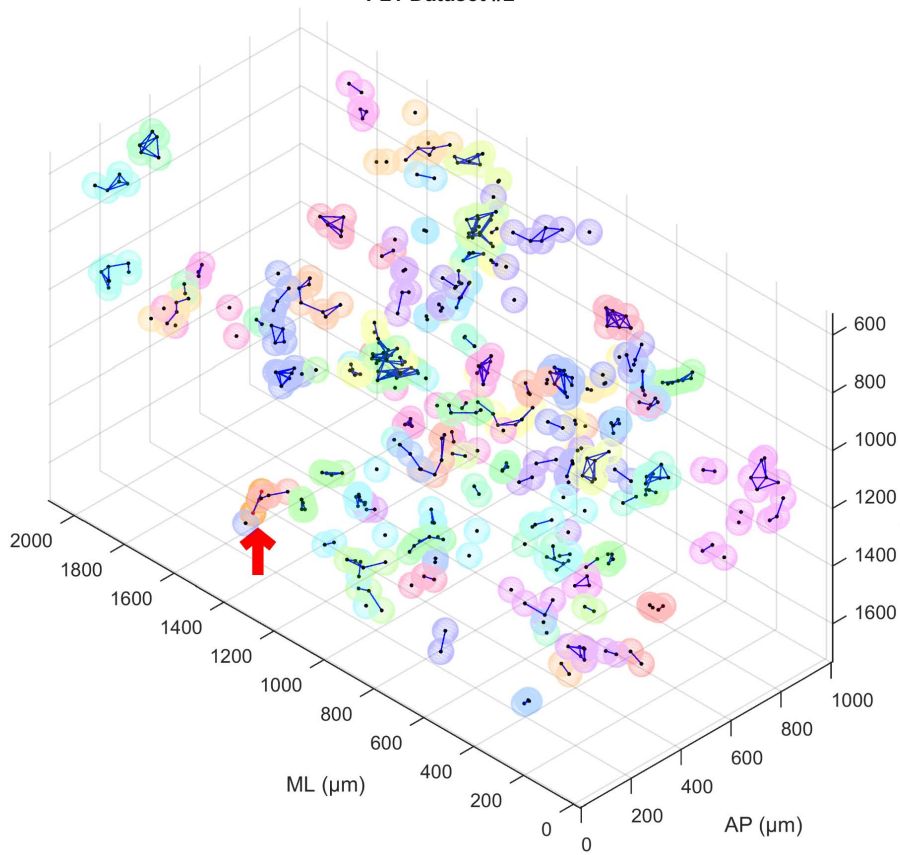

Clone #38

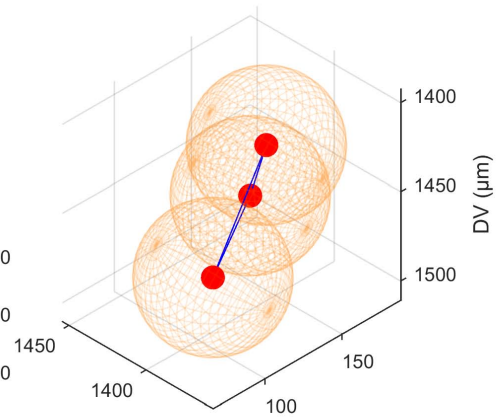

**P21 Dataset #2**

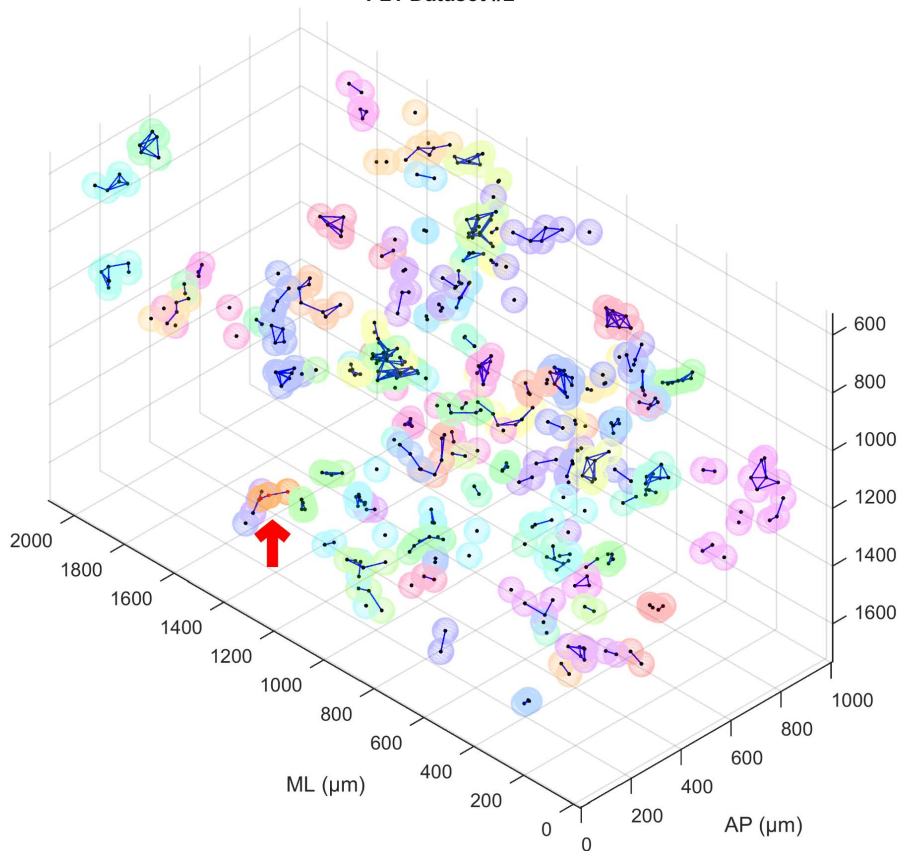

**Clone #39**

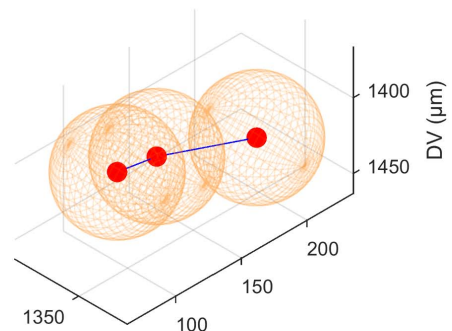

P21 Dataset #2

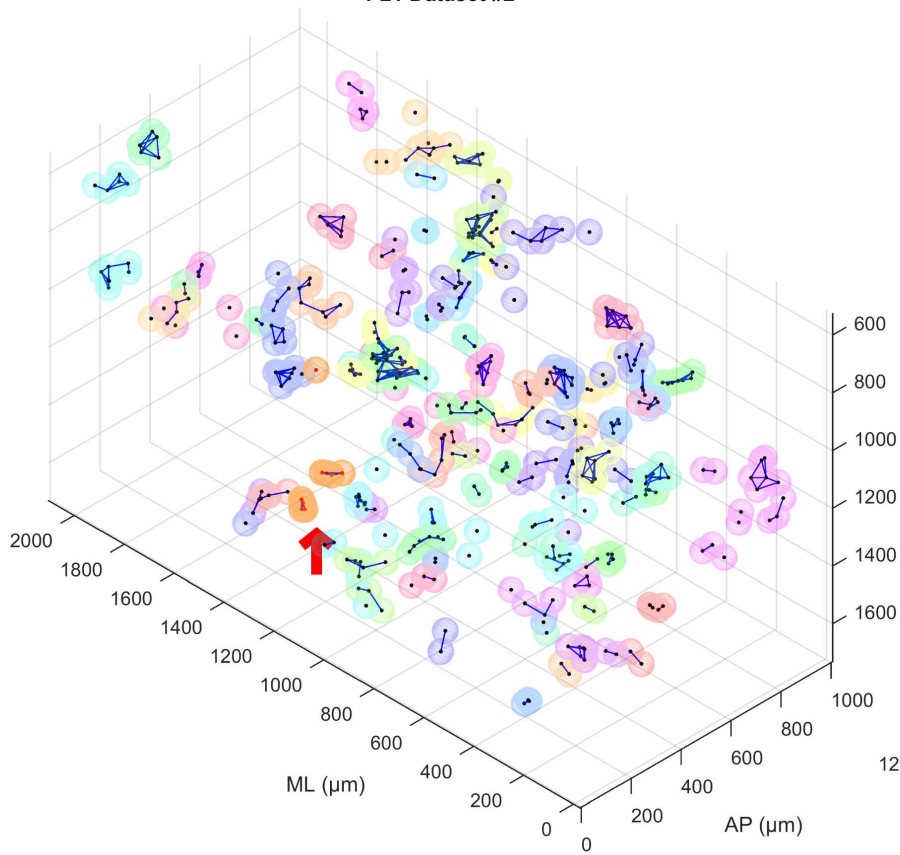

Clone #40

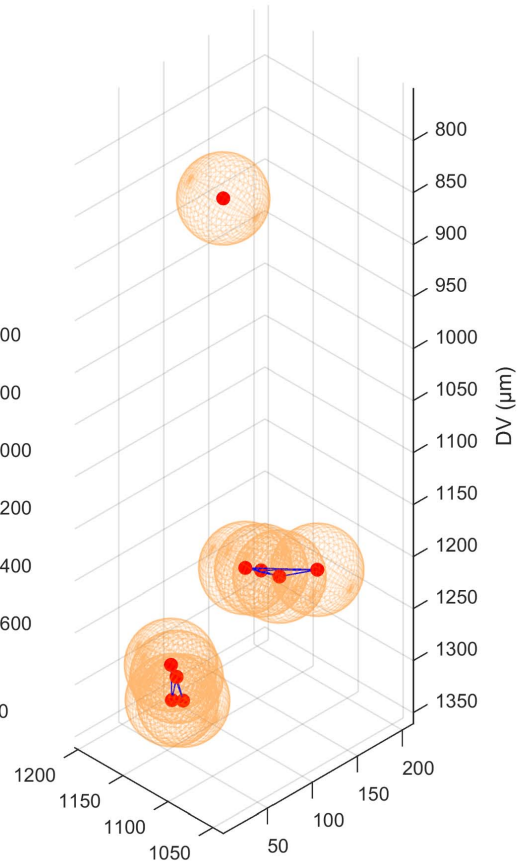

P21 Dataset #2

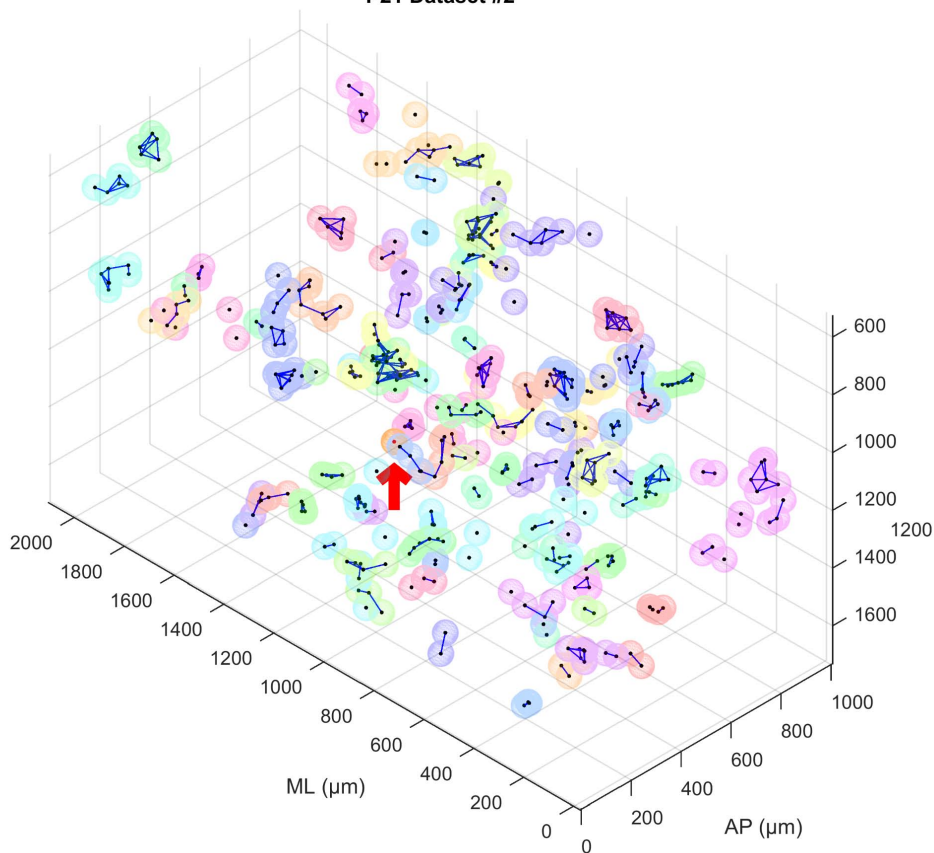

Clone #41

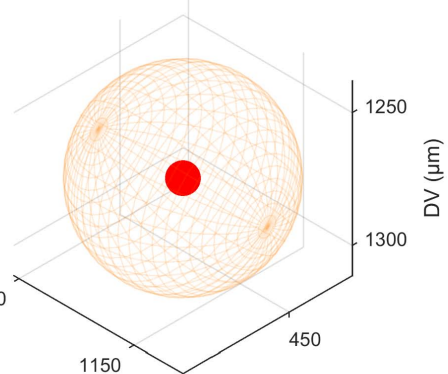

**P21 Dataset #2**

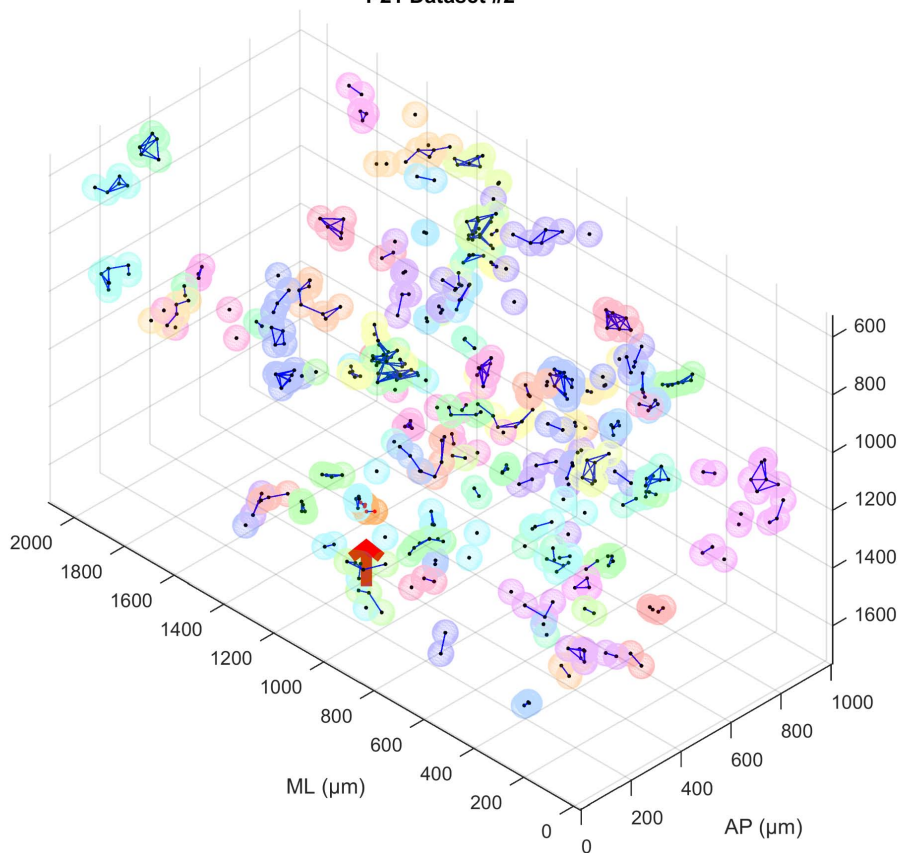

**Clone #42**

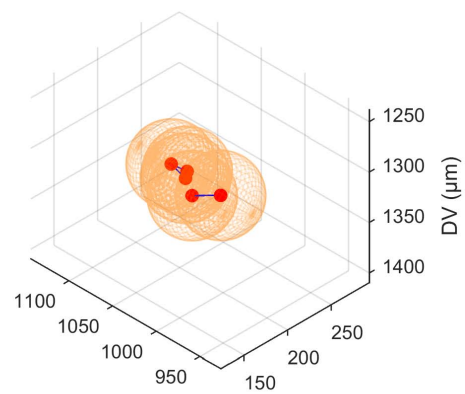



P21 Dataset #2

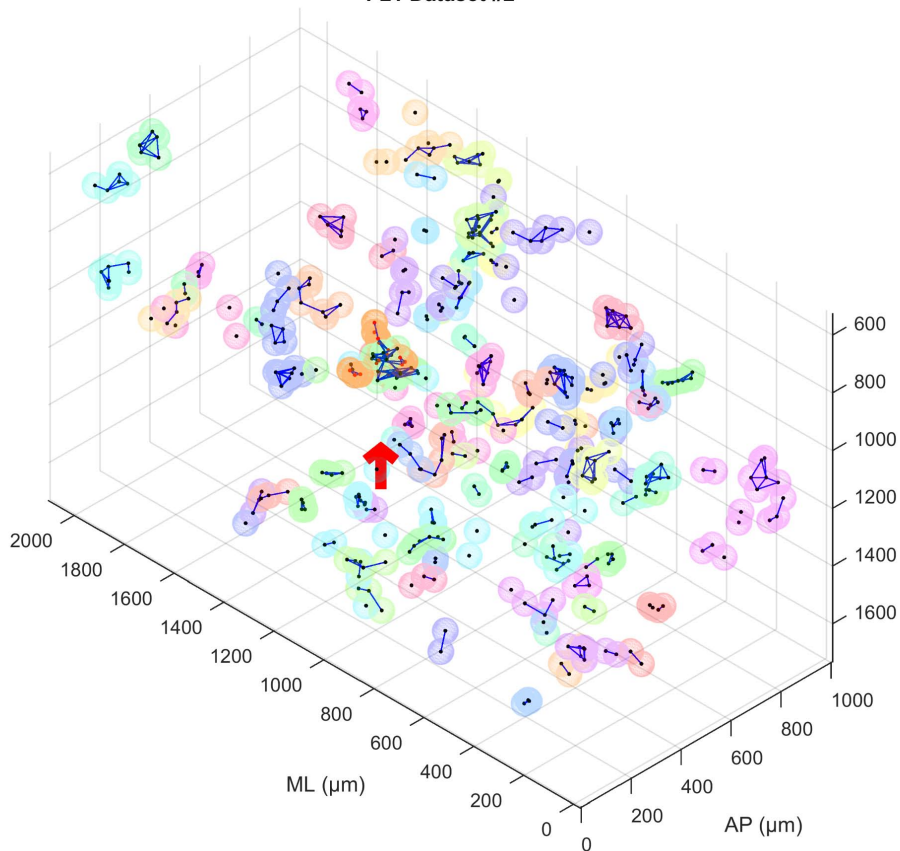

Clone #43

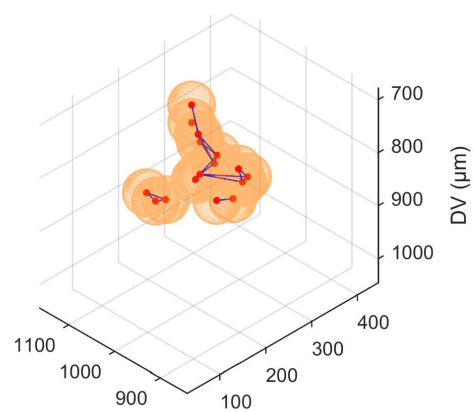

P21 Dataset #2

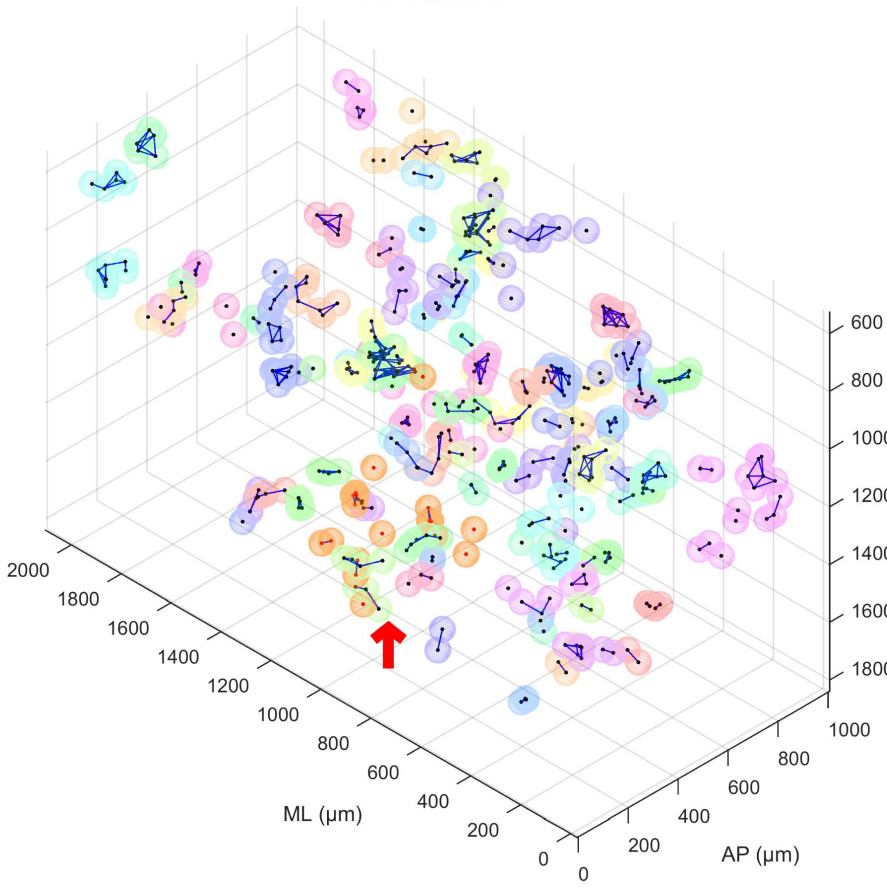

Clone #44

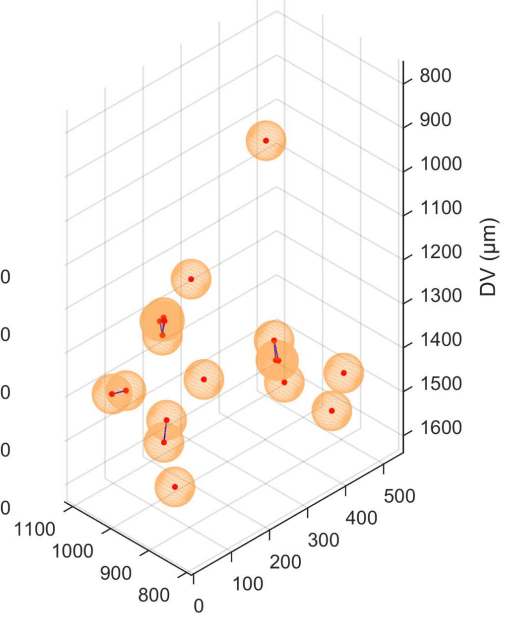

P21 Dataset #2

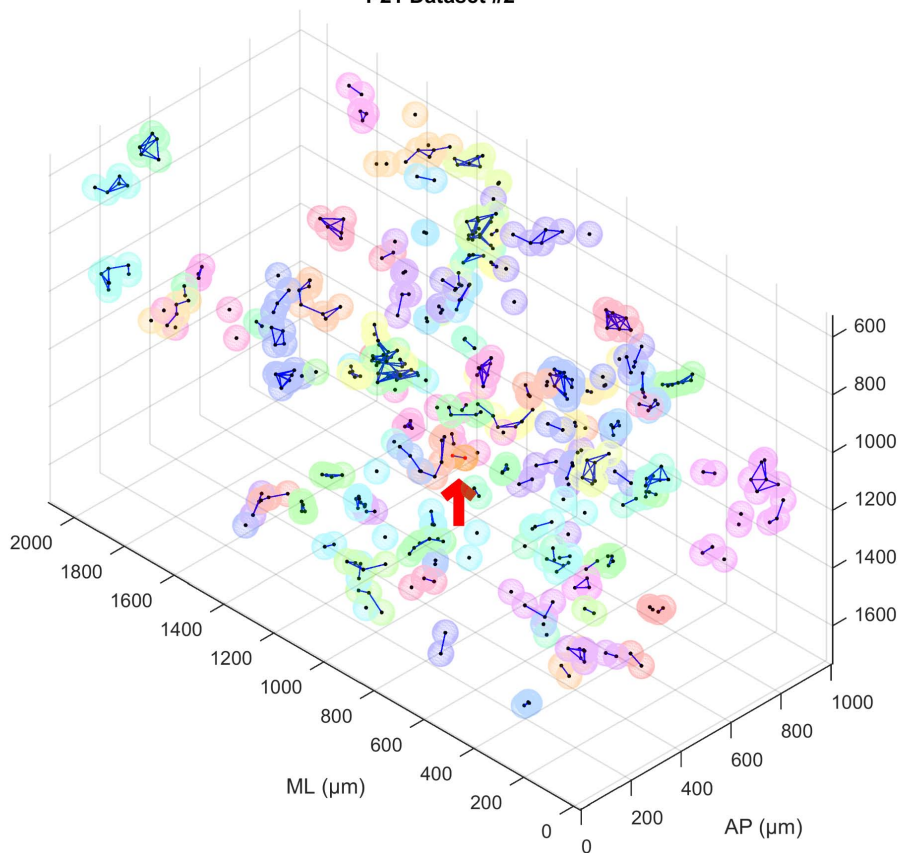

Clone #45

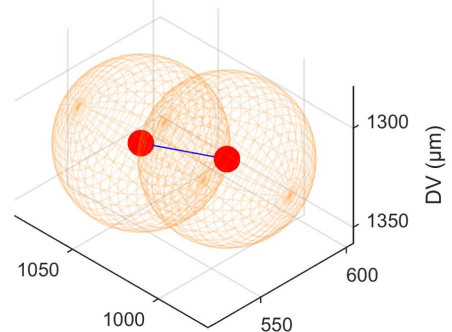

P21 Dataset #2

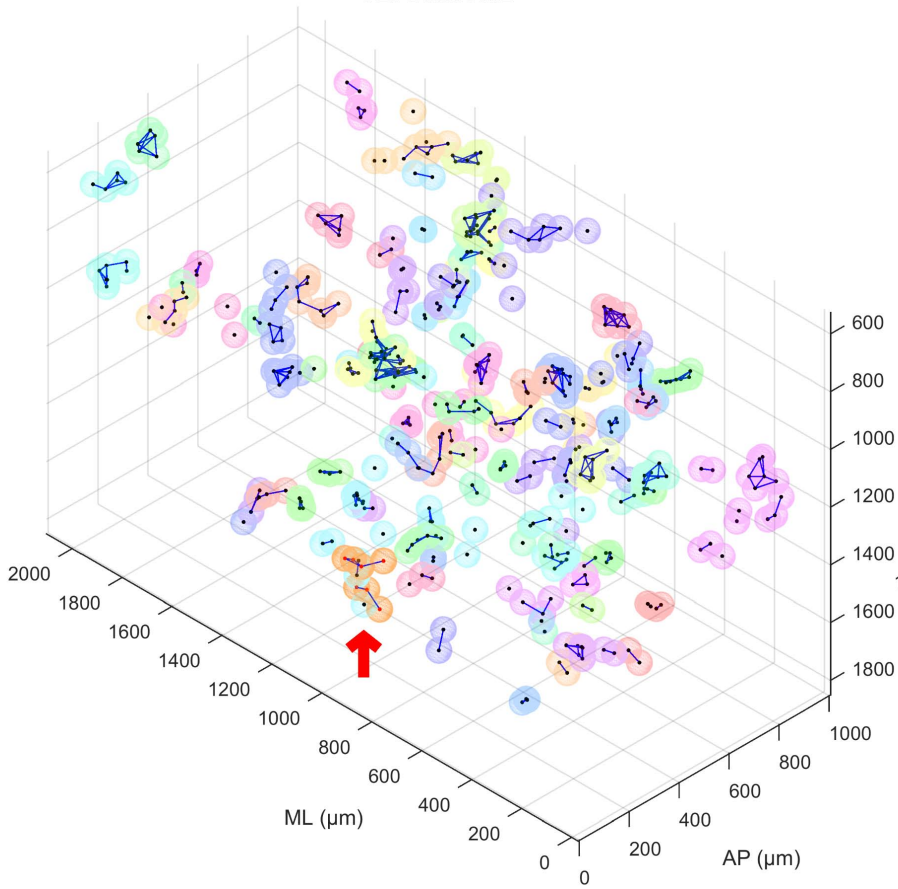

Clone #46

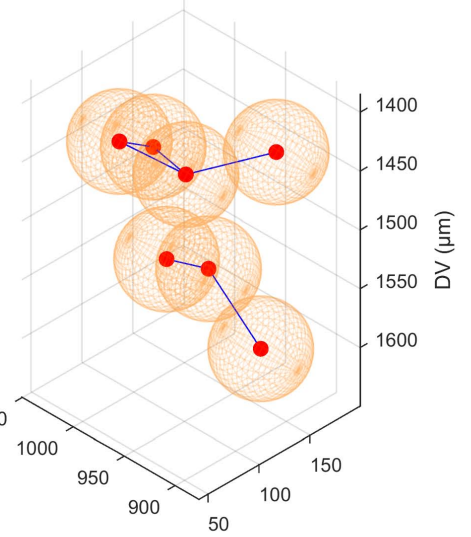

P21 Dataset #2

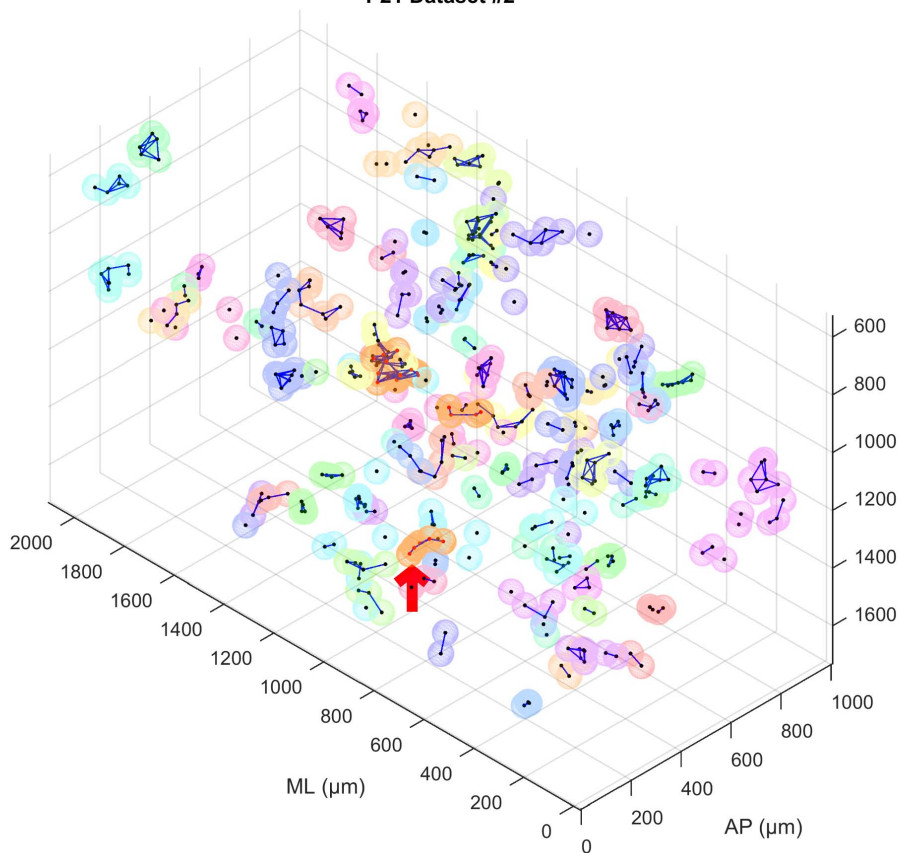

Clone #47

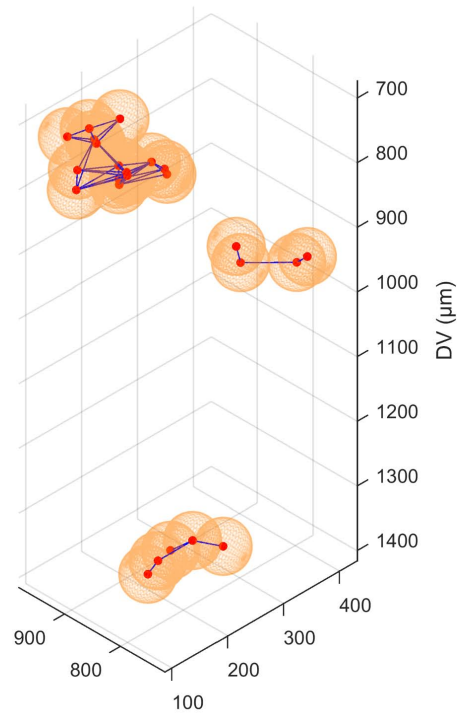

P21 Dataset #2

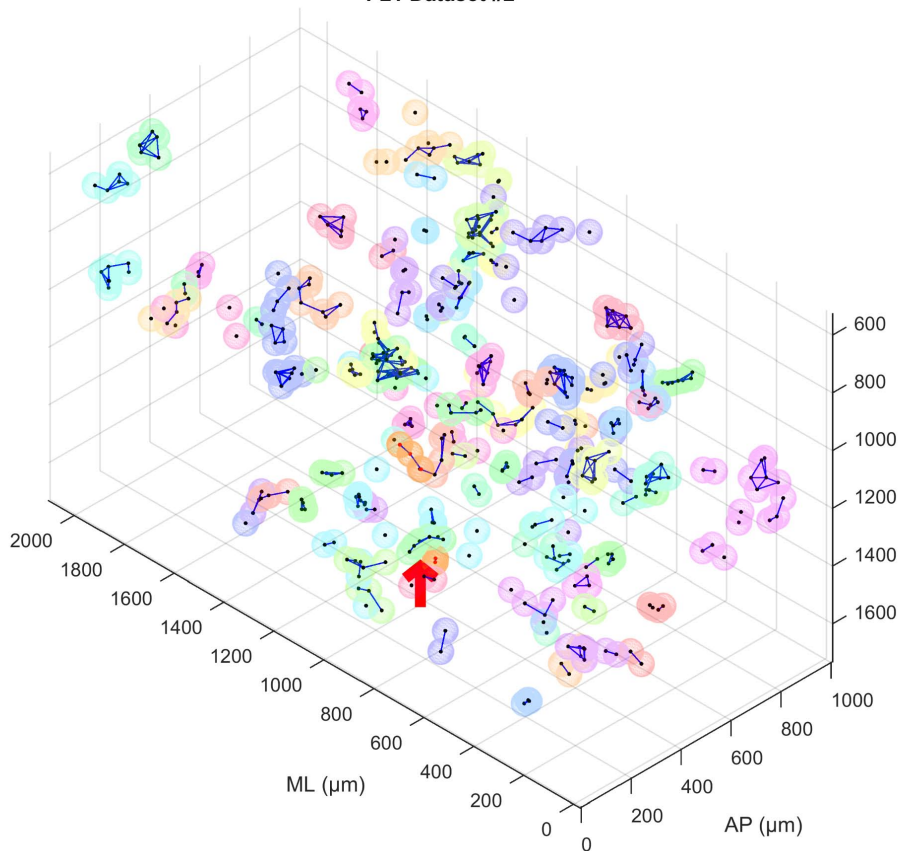

Clone #48

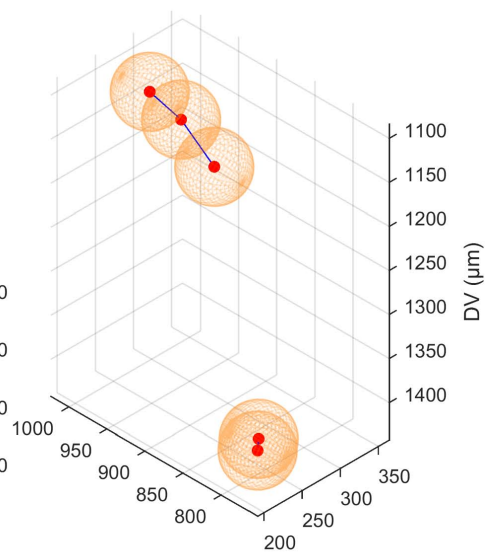

**P21 Dataset #2**

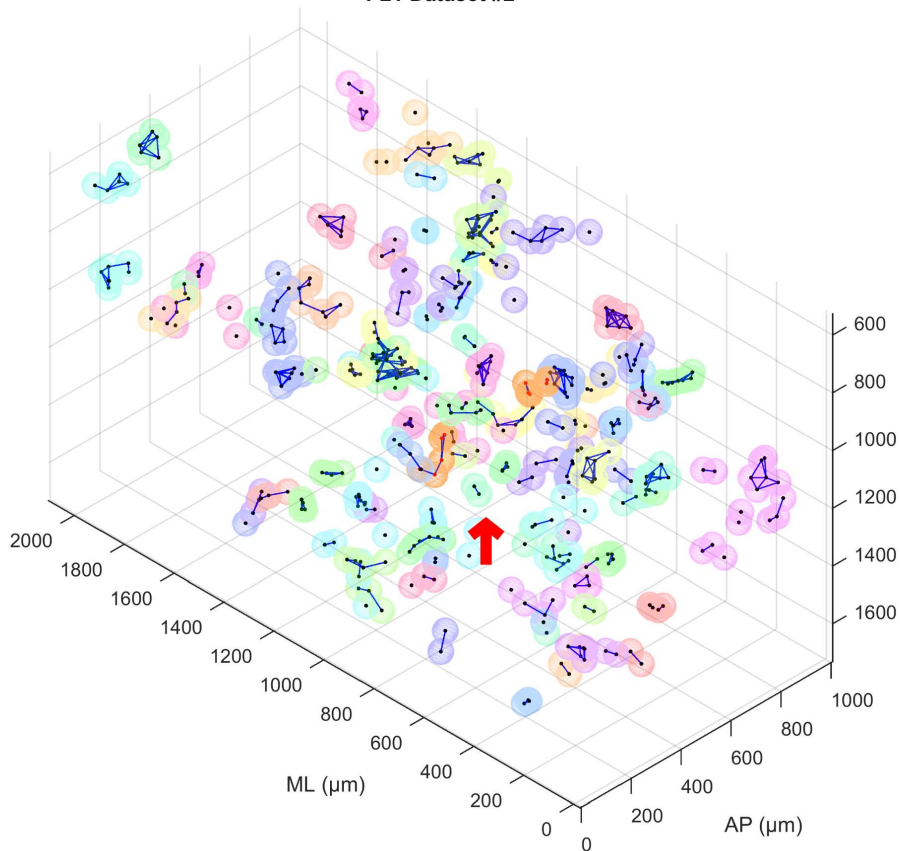

**Clone #49**

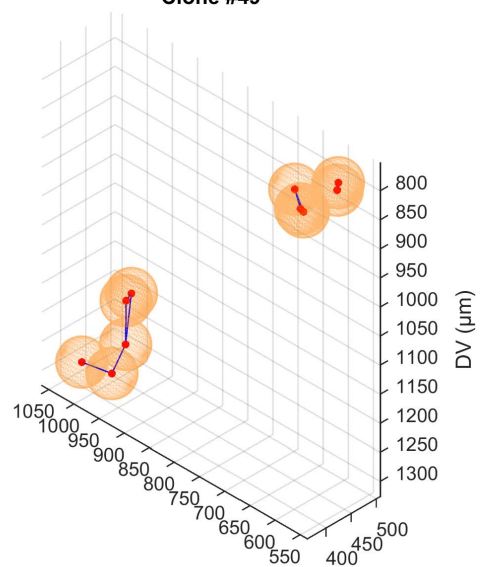

P21 Dataset #2

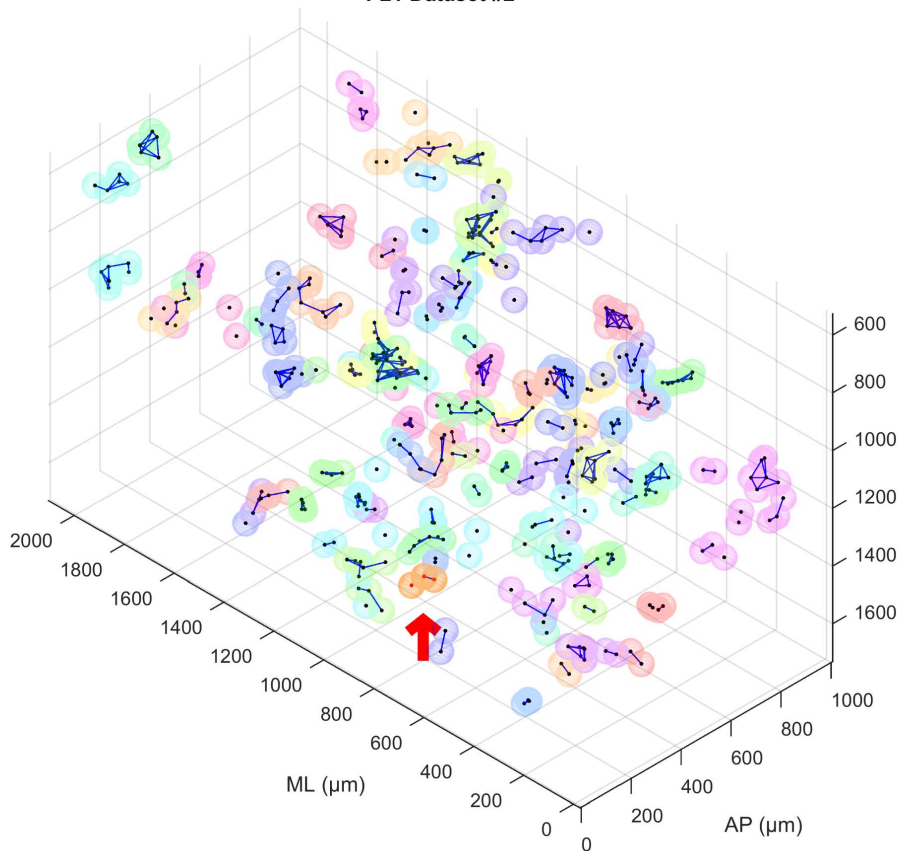

Clone #50

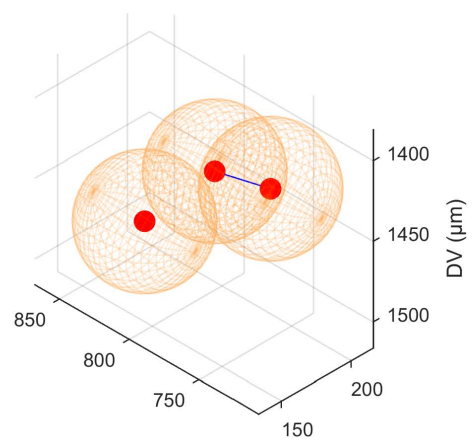



P21 Dataset #2

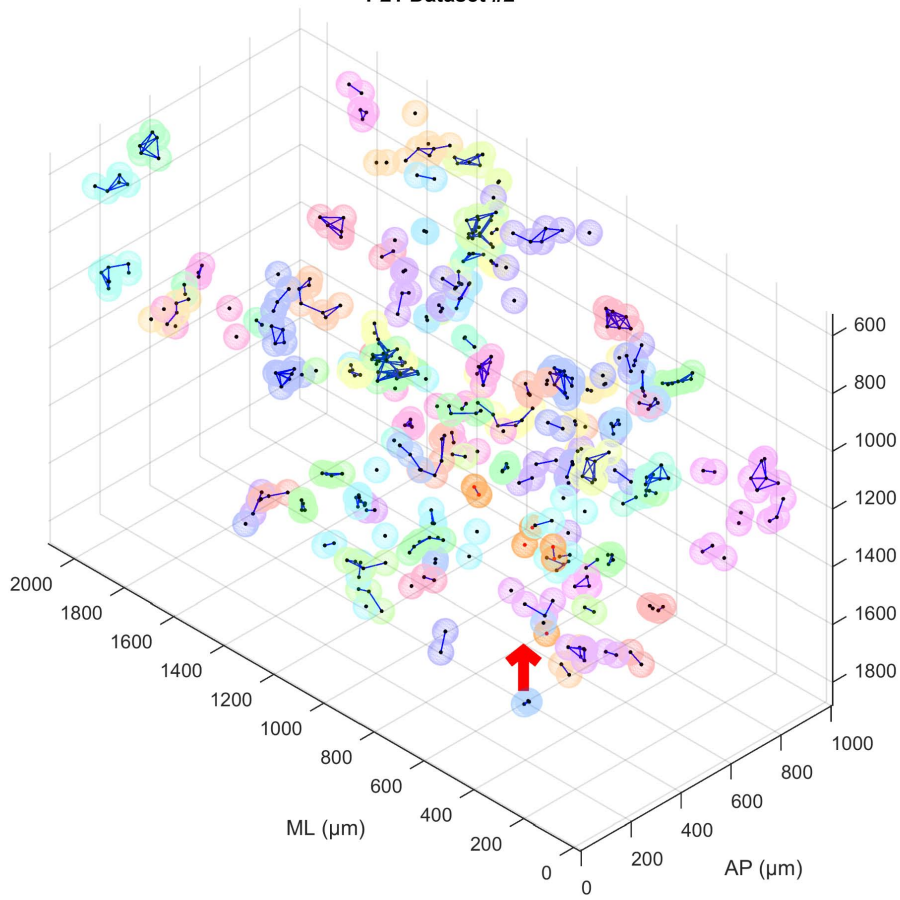

Clone #51

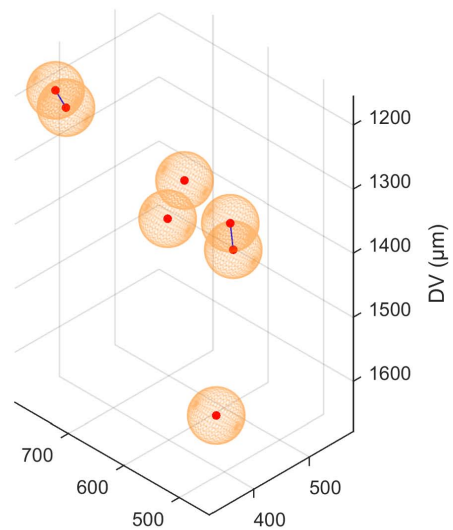

P21 Dataset #2

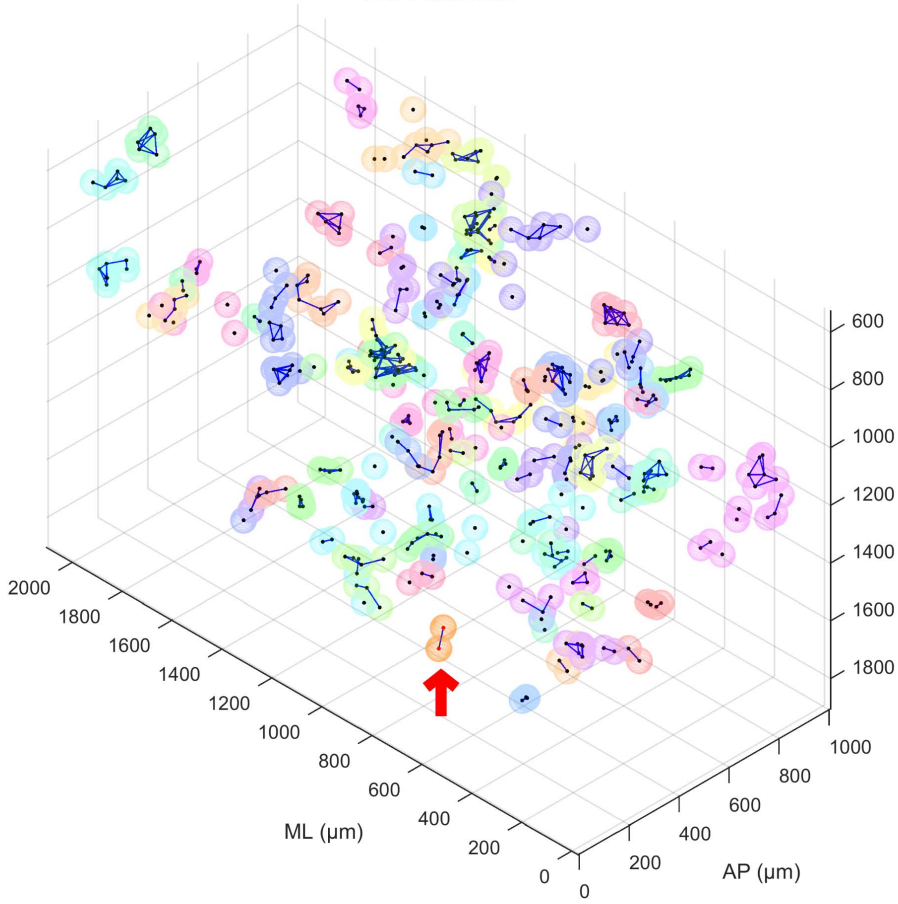

Clone #52

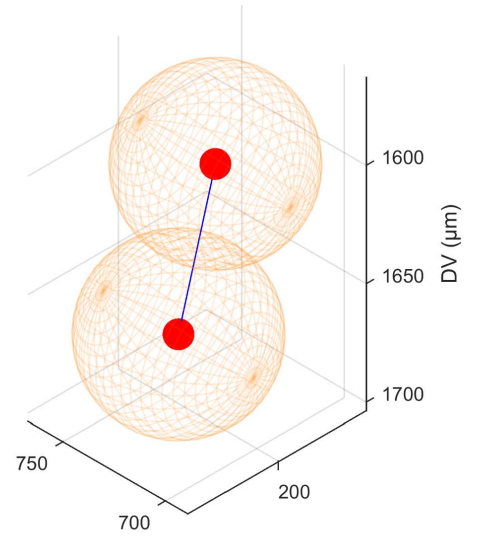

**P21 Dataset #2**

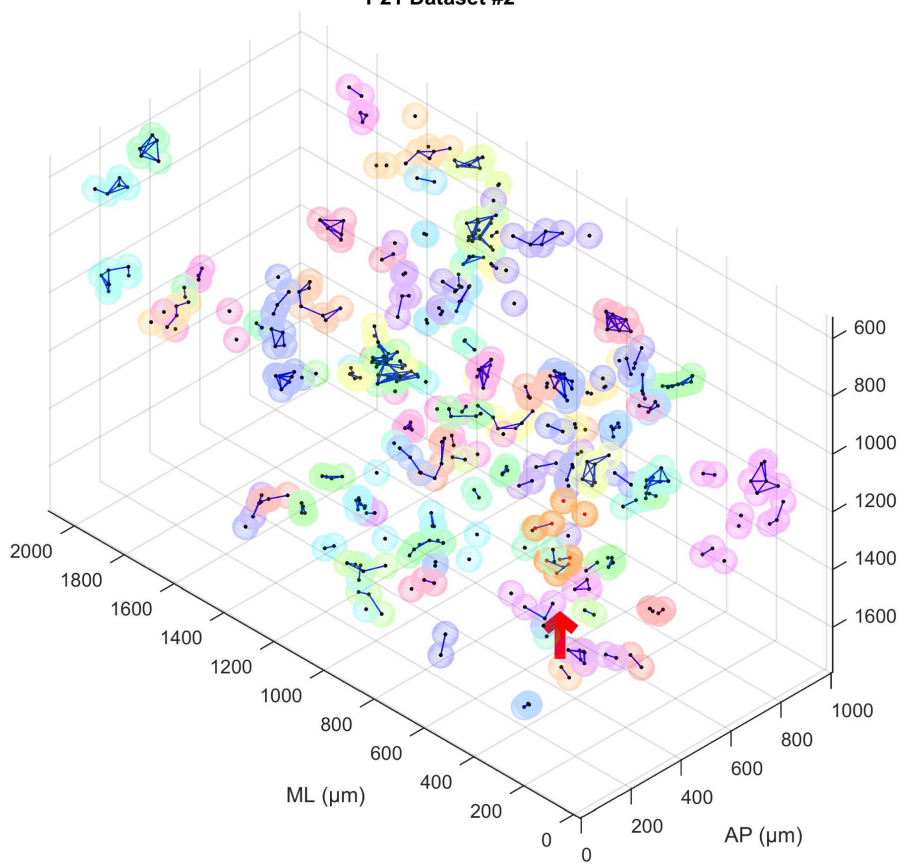

**Clone #53**

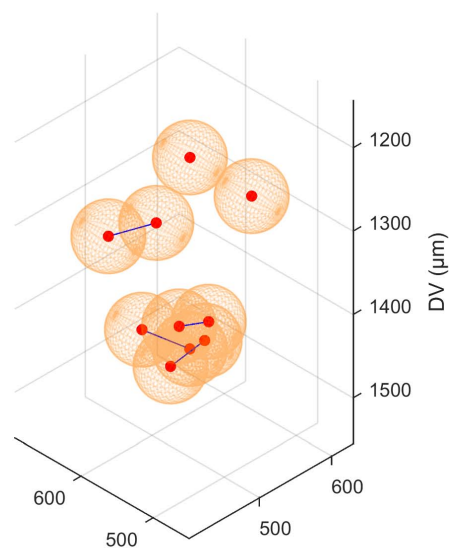

P21 Dataset #2

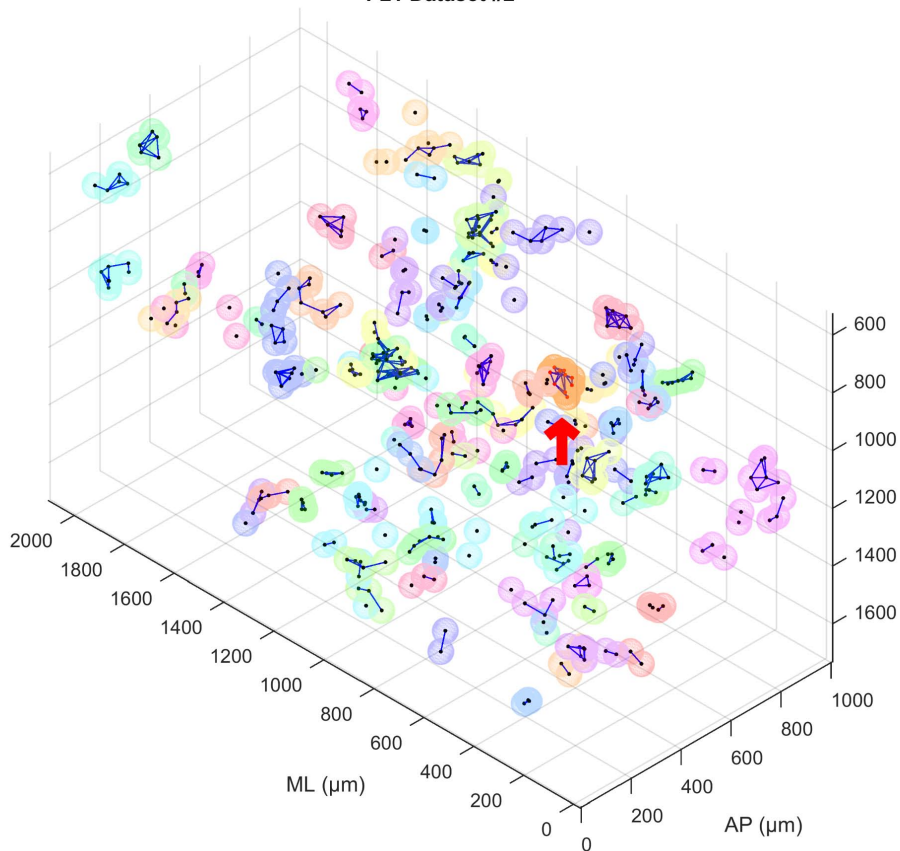

Clone #54

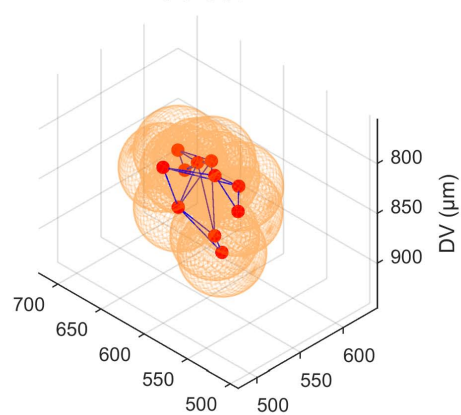

**P21 Dataset #2**

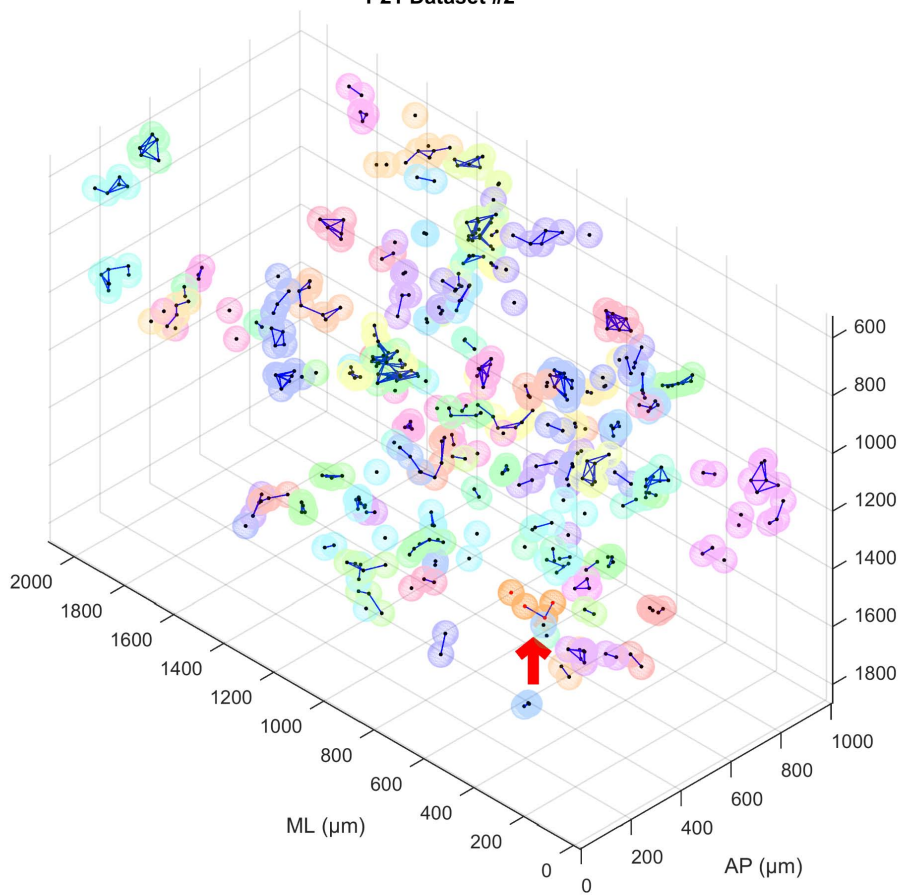

**Clone #55**

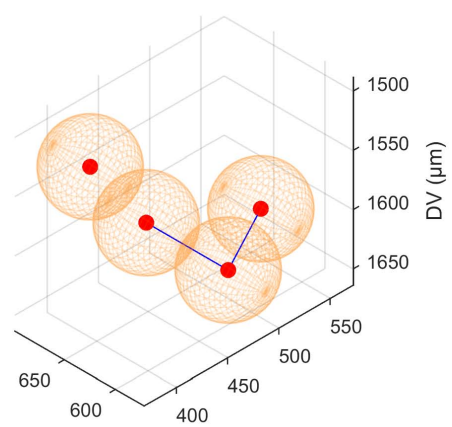

P21 Dataset #2

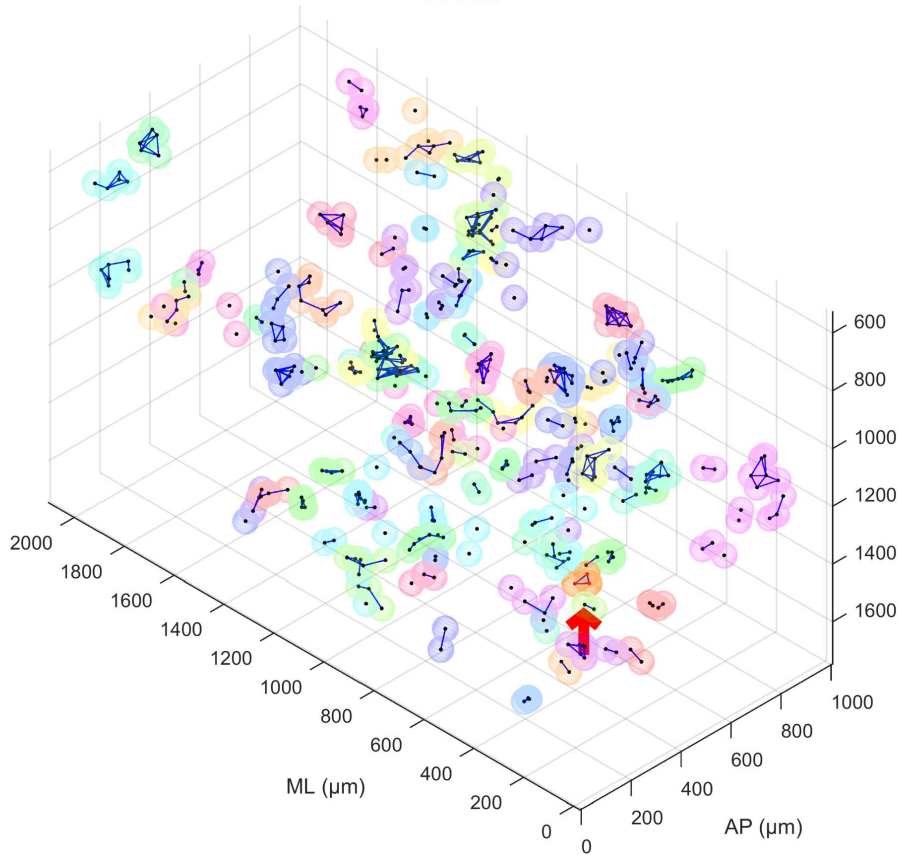

Clone #56

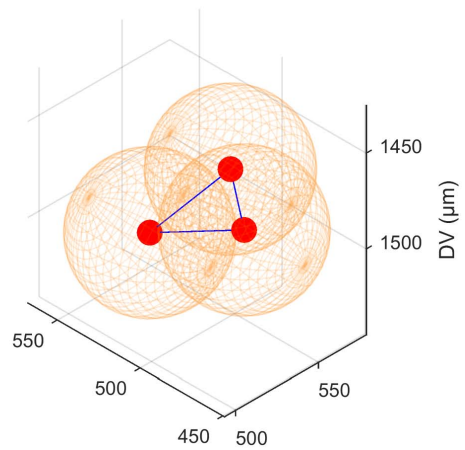

P21 Dataset #2

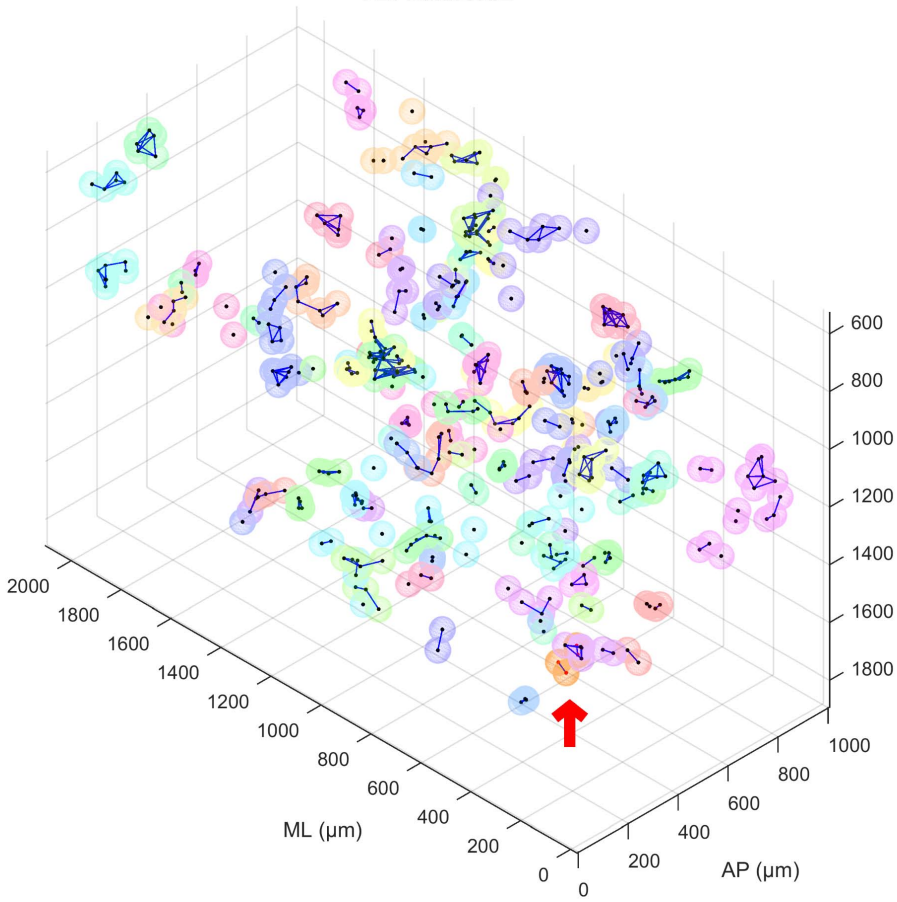

Clone #57

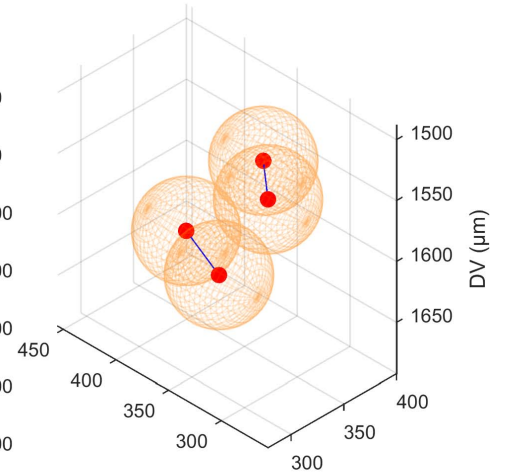

P21 Dataset #2

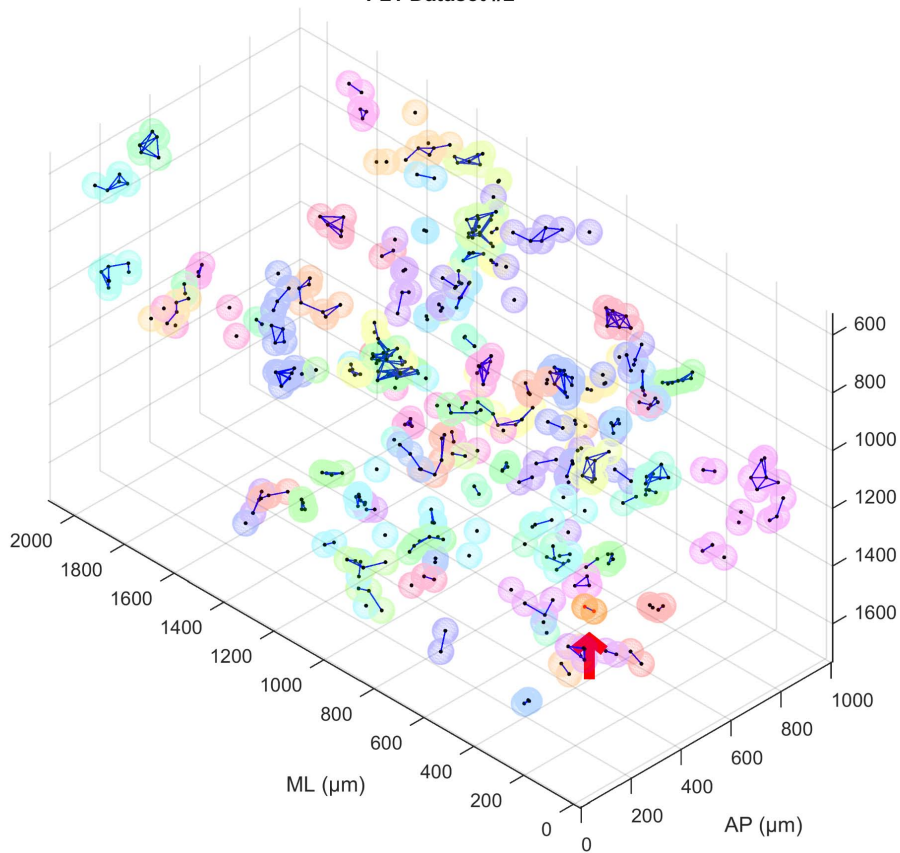

Clone #58

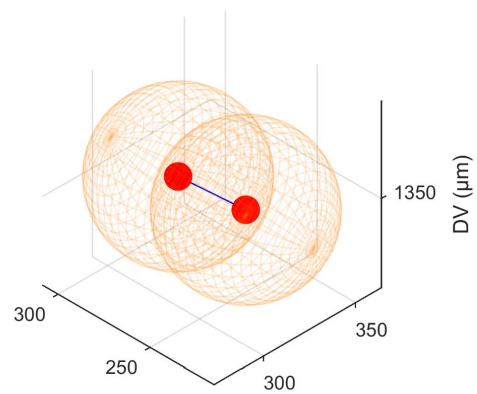



P21 Dataset #2

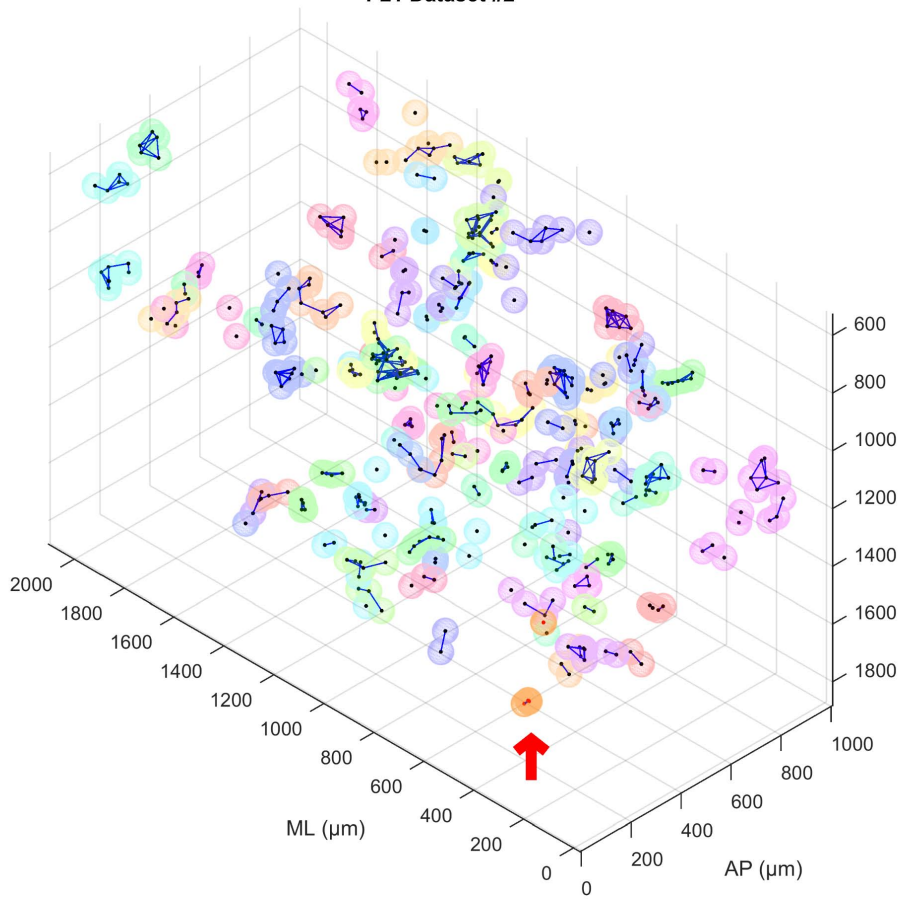

Clone #59

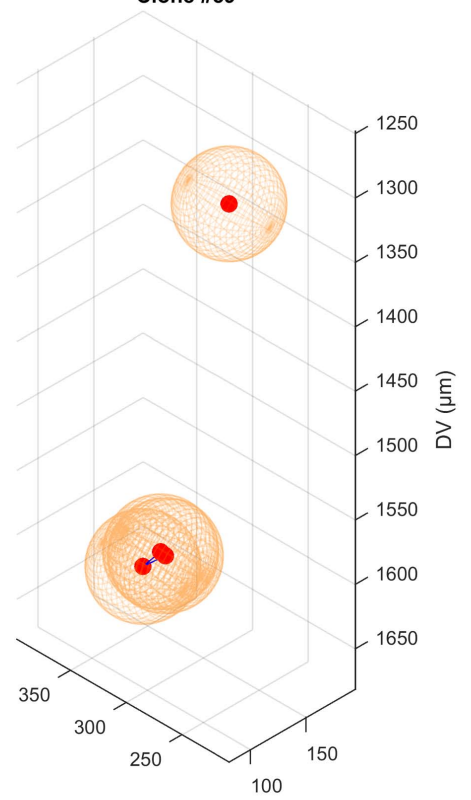

**P21 Dataset #2**

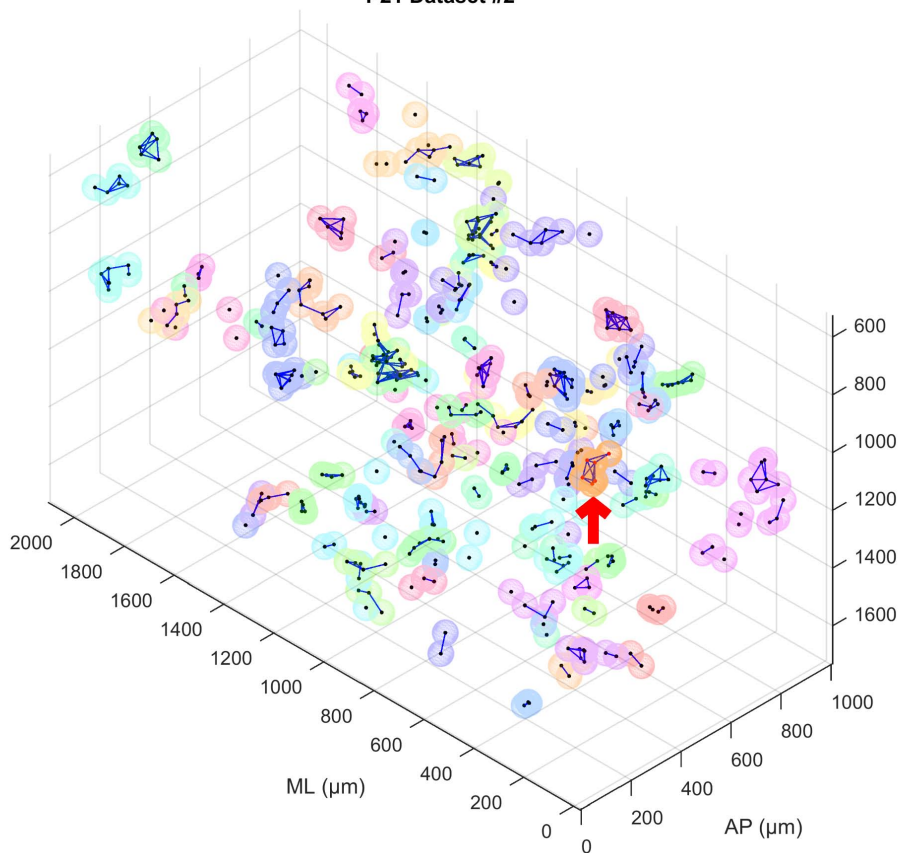

**Clone #60**

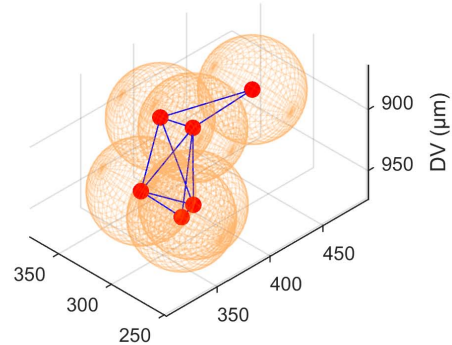

P21 Dataset #2

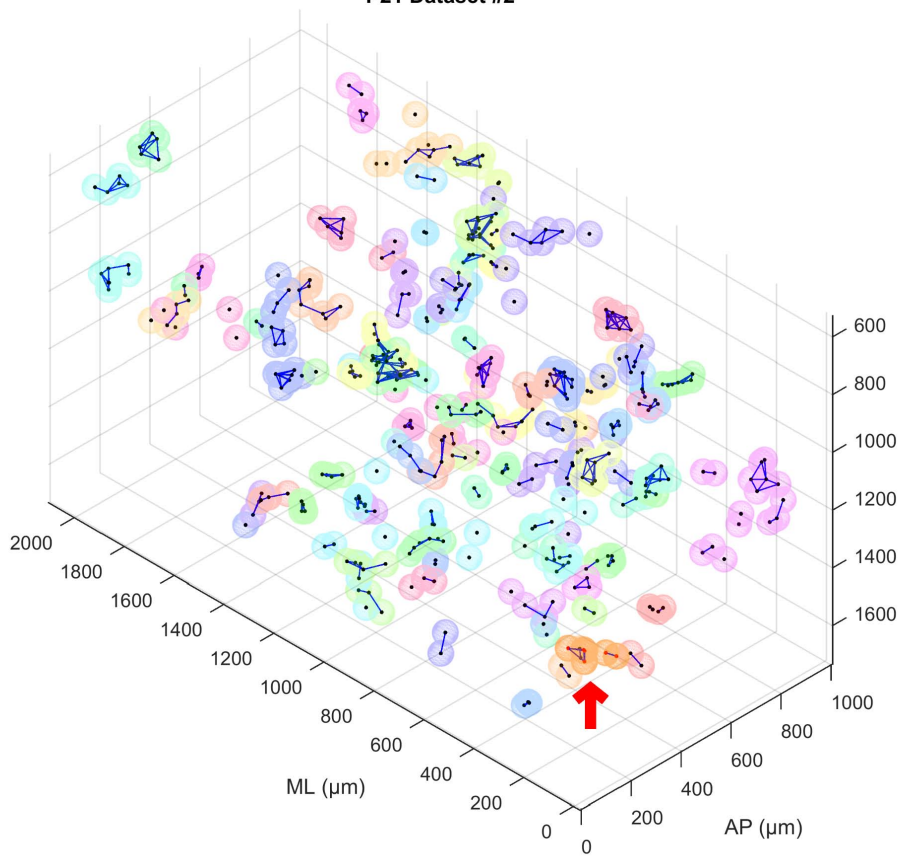

Clone #61

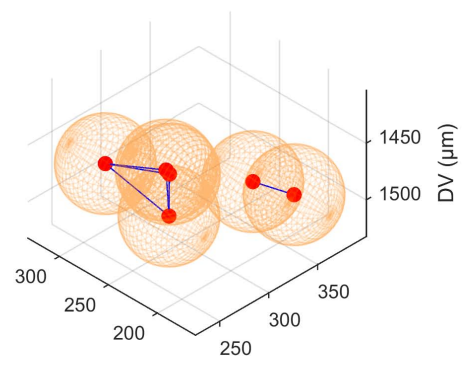

Supplement: 41467_2019_12791_MOESM4_ESM.pdf [file 41467_2019_12791_MOESM4_ESM.pdf]
